# Supplementary material
Source: publisher figshare collection journal article supplement (https://acs.figshare.com/ndownloader/files/4933384)
Supplement: Supplementary file 1 [file 4933384]

## Sheet: Supplementary Table S-2a
Supplementarty Table S-2a. Quantitative results in the experimental null (EN) samples using ion-current-based MS1 method.
Protein AC	Entry Name	Protein Name	Gene Name	Length	Peptide #	EN group 1 TIC (log2)	SEM	EN group 2 TIC (log2)	SEM	Ratio	SEM	p-value
A0A096MJ42	A0A096MJ42_RAT	Disks large homolog 3	Dlg3	817	6	25.2413	0.153727	25.1623	0.180909	0.946656	0.1156	>0.05
A0A096MJE6	A0A096MJE6_RAT	Tenascin R, isoform CRA_b (Tenascin-R)	Tnr rCG_46283	1358	28	27.3581	0.0252161	27.3685	0.0317161	1.00721	0.0224719	>0.05
A0A096MJM1	A0A096MJM1_RAT	Protein Rhog	Rhog	185	6	24.2707	0.041165	24.3001	0.055561	1.02059	0.0384091	>0.05
A0A096MJN4	A0A096MJN4_RAT	Protein Sept4	42251	459	7	22.9684	0.0282377	23.0138	0.0329875	1.03192	0.0236834	>0.05
A0A096MJW8	A0A096MJW8_RAT	Protein Plch1	Plch1	1648	2	20.0242	0.195243	19.9976	0.203095	0.981707	0.124831	>0.05
A0A097PE04	A0A097PE04_RAT	Cytochrome c oxidase subunit II	COX2	227	9	27.3502	0.0499824	27.3113	0.0402066	0.973385	0.0272687	>0.05
A0A0A0MXV4	A0A0A0MXV4_RAT	Protein Ace3	Ace3	1269	2	19.0921	0.10837	19.2893	0.0712554	1.1465	0.0566784	>0.05
A0A0A0MY13	A0A0A0MY13_RAT	Probable G-protein-coupled receptor 158	Gpr158	1206	12	23.642	0.0379369	23.6744	0.0619821	1.02268	0.0424433	>0.05
A0A0A0MY20	A0A0A0MY20_RAT	Uncharacterized protein (Fragment)	0	302	3	19.5242	0.144313	19.7665	0.0635295	1.18291	0.0494114	>0.05
A0JPJ7	OLA1_RAT	Obg-like ATPase 1	Ola1	396	8	23.9999	0.0381971	24.0668	0.0467321	1.04751	0.0335166	>0.05
A1A5L2	A1A5L2_RAT	Pgm1 protein (Fragment)	Pgm1	583	13	25.3001	0.0218587	25.3086	0.0204803	1.00589	0.0143277	>0.05
A1L108	ARP5L_RAT	Actin-related protein 2/3 complex subunit 5-like protein (Arp2/3 complex 16 kDa subunit 2) (ARC16-2)	Arpc5l	153	3	23.5231	0.0555541	23.4831	0.0891163	0.972618	0.0594009	>0.05
A1L1J8	A1L1J8_RAT	Protein Rab5b (RAB5B, member RAS oncogene family) (RAB5B, member RAS oncogene family (Predicted), isoform CRA_c)	Rab5b Rab5b_predicted rCG_42413	215	5	23.459	0.0471229	23.4102	0.0588111	0.966746	0.0403933	>0.05
A1L1L9	A1L1L9_RAT	RGD1563224 protein	Tmem65 RGD1563224	261	2	21.5004	0.0660339	21.6026	0.100583	1.07343	0.0798855	>0.05
A1L1M0	A1L1M0_RAT	Protein kinase, cAMP-dependent, catalytic, alpha (cAMP-dependent protein kinase catalytic subunit alpha)	Prkaca rCG_51506	351	11	26.1091	0.023131	26.071	0.0352241	0.973951	0.0229944	>0.05
A2VCW8	A2VCW8_RAT	Septin 7	42254	437	17	28.4414	0.035957	28.3995	0.0393692	0.971362	0.0251694	>0.05
A3FM27	A3FM27_RAT	Chloride intracellular channel protein	Clic4	253	3	21.7509	0.0469026	21.7137	0.0425038	0.974535	0.0286528	>0.05
A7VJC2	ROA2_RAT	Heterogeneous nuclear ribonucleoproteins A2/B1 (hnRNP A2/B1)	Hnrnpa2b1 Hnrnp Hnrpa2b1	353	12	27.3157	0.0235061	27.2699	0.0209733	0.968794	0.0139499	>0.05
B0BMW0	B0BMW0_RAT	RAB14, member RAS oncogene family (Ras-related protein Rab-14)	Rab14 rCG_45389	215	8	26.7759	0.0187927	26.7801	0.0352167	1.00297	0.0251294	>0.05
B0BMX3	B0BMX3_RAT	Protein S100a16 (S100 calcium binding protein A16 (Predicted), isoform CRA_a) (S100a16 protein)	S100a16 S100a16_predicted rCG_62722	123	2	21.3799	0.0561871	21.3731	0.0571867	0.995316	0.0388713	>0.05
B0BMY7	B0BMY7_RAT	Protein Twf2 (Protein tyrosine kinase 9-like (A6-related protein) (Predicted), isoform CRA_b) (Ptk9l protein)	Twf2 LOC684352 Ptk9l Ptk9l_predicted rCG_25118	349	4	21.0927	0.10299	21.2551	0.0717899	1.11911	0.0593743	>0.05
B0BN52	B0BN52_RAT	Mitochondrial carrier homolog 2 (C. elegans) (Mitochondrial carrier homolog 2 (C. elegans) (Predicted), isoform CRA_a) (Protein Mtch2)	Mtch2 Mtch2_predicted rCG_26739	303	6	24.7913	0.0522551	24.8675	0.027103	1.05424	0.0203683	>0.05
B0BN56	RT31_RAT	28S ribosomal protein S31, mitochondrial (MRP-S31) (S31mt)	Mrps31	387	2	20.5042	0.0936572	20.6515	0.0951856	1.10747	0.0747958	>0.05
B0BN63	B0BN63_RAT	LOC681996 protein (Protein Ahsa1) (RCG20659, isoform CRA_b)	Ahsa1 LOC681996 rCG_20659	338	3	23.7326	0.0374155	23.7892	0.0400833	1.03999	0.0280875	>0.05
B0BN65	B0BN65_RAT	Family with sequence similarity 49, member A (Protein Fam49a) (Putative uncharacterized protein RGD1305961_predicted)	Fam49a RGD1305961_predicted rCG_62196	323	8	23.5227	0.0297573	23.468	0.0254485	0.962779	0.0166815	>0.05
B0BN81	B0BN81_RAT	40S ribosomal protein S5 (Ribosomal protein S5, isoform CRA_b) (Rps5 protein)	Rps5 rCG_27438	204	2	23.5789	0.0637041	23.5767	0.0709191	0.998505	0.0468109	>0.05
B0BN85	SUGT1_RAT	Suppressor of G2 allele of SKP1 homolog	Sugt1	336	3	22.3894	0.191863	22.2813	0.204536	0.927863	0.106195	>0.05
B0BN93	PSD13_RAT	26S proteasome non-ATPase regulatory subunit 13 (26S proteasome regulatory subunit RPN9) (26S proteasome regulatory subunit S11) (26S proteasome regulatory subunit p40.5)	Psmd13	376	3	20.9338	0.034665	20.9001	0.0483226	0.976905	0.0327471	>0.05
B0BNB2	B0BNB2_RAT	Density-regulated protein	Denr LOC687565 rCG_21490	194	2	20.3573	0.0819231	20.4642	0.117666	1.07697	0.0885386	>0.05
B0BND0	ENPP6_RAT	Ectonucleotide pyrophosphatase/phosphodiesterase family member 6 (E-NPP 6) (NPP-6) (EC 3.1.4.-) (EC 3.1.4.38) (Choline-specific glycerophosphodiester phosphodiesterase) (Glycerophosphocholine cholinephosphodiesterase) (GPC-Cpde)	Enpp6	440	7	22.7706	0.0357862	22.7707	0.0188085	1.00005	0.0130973	>0.05
B0BNE5	ESTD_RAT	S-formylglutathione hydrolase (FGH) (EC 3.1.2.12) (Esterase D)	Esd	282	4	24.8889	0.0264899	24.862	0.0468768	0.981533	0.032887	>0.05
B0BNE6	B0BNE6_RAT	NADH dehydrogenase (Ubiquinone) Fe-S protein 8 (Predicted), isoform CRA_a (Ndufs8 protein) (Protein Ndufs8)	Ndufs8 Ndufs8_predicted rCG_47133	212	4	25.1122	0.0230656	25.1015	0.0150129	0.992622	0.0104841	>0.05
B0BNE7	B0BNE7_RAT	Tetraspanin	Tspan7 Tm4sf2_mapped rCG_42841	249	2	21.1827	0.110746	21.2896	0.120035	1.07688	0.0830297	>0.05
B0BNK1	B0BNK1_RAT	Protein Rab5c (RCG32615, isoform CRA_a) (Rab5c protein)	Rab5c rCG_32615	216	4	24.375	0.0305184	24.4003	0.0409475	1.01769	0.0290204	>0.05
B0BNL2	B0BNL2_RAT	PDZ domain-containing protein 2 (Peptidylprolyl cis/trans isomerase, NIMA-interacting 1) (Protein (Peptidyl-prolyl cis/trans isomerase) NIMA-interacting 1 (Predicted), isoform CRA_a)	LOC364561 Pin1 Pin1_predicted rCG_31594	165	5	24.097	0.0404082	24.0722	0.054135	0.982941	0.0364235	>0.05
B0BNM1	NNRE_RAT	NAD(P)H-hydrate epimerase (EC 5.1.99.6) (Apolipoprotein A-I-binding protein) (AI-BP) (NAD(P)HX epimerase)	Apoa1bp Aibp	282	4	24.0805	0.0305491	24.0814	0.0312658	1.00057	0.0212682	>0.05
B0BNM9	GLTP_RAT	Glycolipid transfer protein (GLTP)	GLTP	209	2	21.8924	0.0583835	21.9393	0.0739891	1.03307	0.0557752	>0.05
B0BNN3	CAH1_RAT	Carbonic anhydrase 1 (EC 4.2.1.1) (Carbonate dehydratase I) (Carbonic anhydrase I) (CA-I)	Ca1 Car1	261	2	21.5926	0.0655652	21.548	0.0474504	0.969508	0.0308357	>0.05
B0K008	B0K008_RAT	Eukaryotic translation initiation factor 1 (Protein Eif1) (RCG33041, isoform CRA_b)	Eif1 Eif1l1 Gm5471 rCG_33041	113	2	21.0221	0.0392507	21.0623	0.0386024	1.02825	0.0279279	>0.05
B0K014	B0K014_RAT	D-tyrosyl-tRNA(Tyr) deacylase (EC 3.1.-.-)	Dtd1	209	4	23.8791	0.0519631	23.8474	0.0365637	0.978224	0.0245468	>0.05
B0K020	CISD1_RAT	CDGSH iron-sulfur domain-containing protein 1 (MitoNEET)	Cisd1	108	6	26.7957	0.0123667	26.7604	0.0220376	0.975818	0.01459	>0.05
B0K031	B0K031_RAT	60S ribosomal protein L7 (RCG30479, isoform CRA_b) (Rpl7 protein)	Rpl7 rCG_30479	260	2	20.5151	0.0371145	20.4904	0.066274	0.983018	0.045858	>0.05
B1H239	B1H239_RAT	Leucine rich repeat containing 49 (Predicted) (Lrrc49 protein) (Protein Lrrc49)	Lrrc49 Lrrc49_predicted rCG_58039	686	2	23.8488	0.0665191	23.7703	0.0715812	0.947041	0.0489485	>0.05
B1WBS4	B1WBS4_RAT	Protein Vps26b (Similar to Vacuolar protein sorting 26 homolog (VPS26 protein homolog), isoform CRA_a) (Vps26b protein)	Vps26b LOC300472 rCG_22813	336	3	21.477	0.070922	21.5022	0.056838	1.01761	0.0393829	>0.05
B1WBV6	B1WBV6_RAT	Aplp1 protein	Aplp1	644	2	20.3503	0.151259	19.9886	0.191291	0.778235	0.108764	>0.05
B1WBW4	ARM10_RAT	Armadillo repeat-containing protein 10	Armc10	306	4	20.6212	0.074659	20.7236	0.0702823	1.07353	0.0535837	>0.05
B1WC26	B1WC26_RAT	N-acetylneuraminic acid synthase (N-acetylneuraminic acid synthase (Sialic acid synthase) (Predicted), isoform CRA_a) (Protein Nans)	Nans Nans_predicted rCG_55111	359	4	23.0308	0.0302097	23.0072	0.0353552	0.983764	0.0244971	>0.05
B1WC34	B1WC34_RAT	Protein Prkcsh (Protein kinase C substrate 80K-H) (Protein kinase C substrate 80K-H (Predicted), isoform CRA_b)	Prkcsh Prkcsh_predicted rCG_31596	525	5	22.5072	0.0285341	22.5077	0.0363232	1.00036	0.0254111	>0.05
B1WC50	B1WC50_RAT	Ewsr1 protein (Protein Ewsr1) (RCG36110, isoform CRA_a)	Ewsr1 rCG_36110	655	3	21.3523	0.0601601	21.3397	0.0597848	0.991322	0.0398907	>0.05
B1WC61	B1WC61_RAT	Acad9 protein (Protein Acad9)	Acad9	625	7	22.5436	0.0555636	22.5992	0.0399473	1.03933	0.0292696	>0.05
B1WC64	B1WC64_RAT	Cyp46a1 protein	Cyp46a1	500	5	21.211	0.0415932	21.1839	0.0705205	0.981421	0.0534871	>0.05
B2DD29	BRSK1_RAT	Serine/threonine-protein kinase BRSK1 (EC 2.7.11.1) (EC 2.7.11.26) (Brain-specific serine/threonine-protein kinase 1) (BR serine/threonine-protein kinase 1) (Serine/threonine-protein kinase SAD-B)	Brsk1 Sadb	778	2	20.1671	0.163597	20.1692	0.231475	1.00145	0.150482	>0.05
B2GUV5	B2GUV5_RAT	ATPase, H transporting, lysosomal V1 subunit G1 (Protein Atp6v1g1) (RCG55259, isoform CRA_c)	Atp6v1g1 rCG_55259	118	3	23.5372	0.073814	23.5661	0.0905395	1.02022	0.0689902	>0.05
B2GUY4	B2GUY4_RAT	Epb4.9 protein (Protein Dmtn)	Dmtn Epb4.9 Epb49	354	4	23.8736	0.0519512	23.9058	0.0499167	1.02255	0.0361213	>0.05
B2GUZ3	B2GUZ3_RAT	Mthfd1l protein (Protein Mthfd1l)	Mthfd1l	977	3	20.6952	0.243241	20.4247	0.181651	0.829044	0.130152	>0.05
B2GUZ5	CAZA1_RAT	F-actin-capping protein subunit alpha-1 (CapZ alpha-1)	Capza1	286	6	23.8591	0.0297965	23.8964	0.0358898	1.02618	0.0253719	>0.05
B2GUZ9	B2GUZ9_RAT	Fam49b protein (Protein Fam49b) (Similar to 0910001A06Rik protein (Predicted), isoform CRA_a)	Fam49b RGD1307697_predicted rCG_59591	324	9	24.6313	0.0335867	24.6795	0.0380836	1.03395	0.0275239	>0.05
B2GV06	SCOT1_RAT	Succinyl-CoA:3-ketoacid coenzyme A transferase 1, mitochondrial (EC 2.8.3.5) (3-oxoacid CoA-transferase 1) (Somatic-type succinyl-CoA:3-oxoacid CoA-transferase) (SCOT-s)	Oxct1 Oxct Scot	520	5	23.3631	0.0463498	23.4454	0.0598153	1.05871	0.0425764	>0.05
B2GV54	NCEH1_RAT	Neutral cholesterol ester hydrolase 1 (NCEH) (EC 3.1.1.-) (Arylacetamide deacetylase-like 1)	Nceh1 Aadacl1	408	4	21.2807	0.0486319	21.2768	0.0525684	0.997285	0.0371948	>0.05
B2GV72	B2GV72_RAT	Carbonyl reductase 3 (Carbonyl reductase 3 (Predicted)) (Protein Cbr3)	Cbr3 Cbr3_predicted rCG_53069	277	7	22.771	0.0286606	22.8408	0.0323599	1.04958	0.0236554	>0.05
B2GV73	B2GV73_RAT	Actin-related protein 2/3 complex subunit 3 (Arp2/3 complex 21 kDa subunit)	Arpc3 Arpc3_predicted rCG_21863	178	2	21.0347	0.0506	21.0543	0.111042	1.01367	0.0767826	>0.05
B2GV74	B2GV74_RAT	Kinesin light chain 2 (Predicted), isoform CRA_b (Klc2 protein) (Protein Klc2)	Klc2 Klc2_predicted rCG_48462	622	5	21.4103	0.0415674	21.4275	0.0450409	1.01203	0.0329469	>0.05
B2GVB4	B2GVB4_RAT	Sept9 protein (Fragment)	42256	550	6	21.9493	0.140467	22.1315	0.178592	1.13462	0.18401	>0.05
B2RYG6	OTUB1_RAT	Ubiquitin thioesterase OTUB1 (EC 3.4.19.12) (Deubiquitinating enzyme OTUB1) (OTU domain-containing ubiquitin aldehyde-binding protein 1) (Otubain-1) (Ubiquitin-specific-processing protease OTUB1)	Otub1	271	10	25.9933	0.026424	26.0014	0.0270881	1.00562	0.0192465	>0.05
B2RYJ7	B2RYJ7_RAT	ARP1 actin-related protein 1 homolog B (Yeast) (Protein Actr1b) (RCG22324, isoform CRA_a)	Actr1b rCG_22324	376	8	25.3086	0.0101143	25.3142	0.0271359	1.00386	0.0183432	>0.05
B2RYQ2	B2RYQ2_RAT	Serine/threonine-protein phosphatase 2A activator (EC 5.2.1.8) (Phosphotyrosyl phosphatase activator)	Ppp2r4 Ppp2r4_predicted rCG_45567	323	7	23.3663	0.0380749	23.4055	0.0357976	1.0276	0.02546	>0.05
B2RYS2	B2RYS2_RAT	Cytochrome b-c1 complex subunit 7	LOC685596 Uqcrb rCG_60159	111	5	26.5196	0.0231944	26.4879	0.0266604	0.97826	0.0178375	>0.05
B2RYS8	B2RYS8_RAT	NADH dehydrogenase (Ubiquinone) 1 beta subcomplex 8 (NADH dehydrogenase (Ubiquinone) 1 beta subcomplex 8 (Predicted), isoform CRA_a) (Protein Ndufb8)	Ndufb8 Ndufb8_predicted rCG_57427	186	5	24.9509	0.0546672	24.9317	0.0435441	0.986837	0.0297194	>0.05
B2RYT5	B2RYT5_RAT	Cox7a2l protein (Cytochrome c oxidase subunit VIIa polypeptide 2 like (Predicted), isoform CRA_d)	Cox7a2l Cox7a2l_predicted rCG_61728	113	4	23.5027	0.0348617	23.5151	0.0381002	1.00865	0.0271278	>0.05
B2RYW3	B2RYW3_RAT	NADH dehydrogenase (Ubiquinone) 1 beta subcomplex, 9 (NADH dehydrogenase (Ubiquinone) 1 beta subcomplex, 9 (Predicted)) (Ndufb9 protein) (Protein Ndufb9)	Ndufb9 Ndufb9_predicted rCG_60288	179	4	24.0729	0.0636145	23.8849	0.0603839	0.877818	0.0382073	<0.05
B2RYW9	FAHD2_RAT	Fumarylacetoacetate hydrolase domain-containing protein 2 (EC 3.-.-.-)	Fahd2 Fahd2a	313	6	24.5117	0.0280733	24.5442	0.027183	1.02279	0.0188767	>0.05
B2RYX1	B2RYX1_RAT	LOC685322 protein (RCG36127, isoform CRA_c)	Uqcr10 LOC685322 rCG_36127	64	2	25.7494	0.0386706	25.8207	0.0275383	1.05064	0.020045	>0.05
B2RZ27	B2RZ27_RAT	Protein Sh3bgrl3 (SH3 domain binding glutamic acid-rich protein-like 3) (SH3 domain binding glutamic acid-rich protein-like 3 (Predicted), isoform CRA_b)	Sh3bgrl3 Sh3bgrl3_predicted rCG_30780	93	4	23.0918	0.0267412	23.067	0.0272305	0.982957	0.0183622	>0.05
B2RZ33	B2RZ33_RAT	Nck1 protein (Non-catalytic region of tyrosine kinase adaptor protein 1 (Predicted), isoform CRA_a)	Nck1 Nck1_predicted rCG_25905	377	2	21.1773	0.301019	21.033	0.268108	0.904764	0.183615	>0.05
B2RZ37	REEP5_RAT	Receptor expression-enhancing protein 5 (Polyposis locus protein 1 homolog)	Reep5 Dp1	189	3	22.6369	0.0388902	22.6002	0.0409058	0.974896	0.0286937	>0.05
B2RZ72	B2RZ72_RAT	Actin related protein 2/3 complex, subunit 4 (Predicted), isoform CRA_a (Arpc4 protein) (Protein Arpc4)	Arpc4 Arpc4_predicted rCG_56555	168	5	24.0657	0.0353193	24.0733	0.0262565	1.00528	0.0187062	>0.05
B2RZ78	VPS29_RAT	Vacuolar protein sorting-associated protein 29 (Vesicle protein sorting 29)	Vps29	182	3	21.9183	0.05546	21.9003	0.0343674	0.987579	0.0232683	>0.05
B2RZA9	B2RZA9_RAT	Protein Ube2l3 (Ube2l3 protein)	Ube2l3	154	4	24.8779	0.0218385	24.9017	0.010263	1.01662	0.00727094	>0.05
B2RZC6	B2RZC6_RAT	Ilf2 protein (RCG62739, isoform CRA_a)	Ilf2 rCG_62739	390	3	21.0813	0.035521	21.1283	0.0788405	1.0331	0.063185	>0.05
B2RZD6	B2RZD6_RAT	Ndufa4 protein (Protein Ndufa4) (RCG28086, isoform CRA_a)	Ndufa4 rCG_28086	82	2	26.9114	0.0617222	27.032	0.0403834	1.08716	0.0301678	>0.05
B3GNI6	SEP11_RAT	Septin-11	42258	431	16	27.3482	0.0434436	27.3581	0.0420464	1.0069	0.0289981	>0.05
B4F772	B4F772_RAT	Heat shock 70 kDa protein 4L (Heat shock 70kDa protein 4-like (Predicted), isoform CRA_b) (Hspa4l protein)	Hspa4l Hspa4l_predicted rCG_41537	838	21	25.0426	0.0288956	25.0733	0.0322417	1.02148	0.02242	>0.05
B4F774	B4F774_RAT	Ganglioside-induced differentiation-associated protein 1-like 1 (Predicted) (Gdap1l1 protein) (Protein Gdap1l1)	Gdap1l1 Gdap1l1_predicted rCG_32097	366	7	22.7152	0.0431693	22.7567	0.0438875	1.02912	0.0334424	>0.05
B4F7A3	B4F7A3_RAT	Galectin	Lgalsl Hspc159 rCG_23337	172	2	21.8252	0.0807541	21.9046	0.0567635	1.05658	0.0435819	>0.05
B4F7C2	B4F7C2_RAT	Protein Tubb4a (RCG45085) (Tubulin, beta 4)	Tubb4a Tubb4 rCG_45085	444	41	33.0943	0.0191011	33.0826	0.021935	0.991945	0.0151791	>0.05
B4F7C7	B4F7C7_RAT	Hebp1 protein (Heme binding protein 1 (Predicted), isoform CRA_a)	Hebp1 Hebp1_predicted rCG_29707	190	7	24.2983	0.0371505	24.2878	0.0389722	0.992747	0.0282044	>0.05
B5DEL2	B5DEL2_RAT	Cpsf1 protein	Cpsf1	1439	4	22.7198	0.114271	22.634	0.0636648	0.94227	0.0429108	>0.05
B5DEL8	B5DEL8_RAT	NADH dehydrogenase (Ubiquinone) Fe-S protein 5 (Protein LOC100361505) (RCG31129, isoform CRA_b)	LOC100361505 LOC100363268 Ndufs5 rCG_31129	106	4	24.0404	0.0514561	24.106	0.0439242	1.0465	0.0325132	>0.05
B5DEN5	B5DEN5_RAT	Eukaryotic translation elongation factor 1 beta 2 (Protein Eef1b2) (RCG22471, isoform CRA_b)	Eef1b2 rCG_22471	225	4	23.3784	0.0484442	23.4189	0.0498933	1.02849	0.0356337	>0.05
B5DF41	SNPH_RAT	Syntaphilin	Snph	504	4	21.932	0.045536	21.9275	0.0488991	0.996838	0.0356079	>0.05
B5DF55	B5DF55_RAT	Protein Stam (RCG55706) (Signal transducing adaptor molecule (SH3 domain and ITAM motif) 1)	Stam rCG_55706	547	3	22.0717	0.0497834	22.0376	0.0577699	0.976636	0.0383853	>0.05
B5DF65	B5DF65_RAT	Biliverdin reductase B (Flavin reductase (NADPH)) (Biliverdin reductase B (Flavin reductase (NADPH)) (Predicted), isoform CRA_b) (Protein Blvrb)	Blvrb Blvrb_predicted LOC681468 rCG_53861	206	4	24.6636	0.0339487	24.7011	0.0382758	1.02632	0.0283858	>0.05
B5DF89	CUL3_RAT	Cullin-3	Cul3	768	3	21.4232	0.0515082	21.483	0.0686645	1.04232	0.0487562	>0.05
B5DF91	B5DF91_RAT	ELAV-like protein	Elavl1 Elavl1_predicted hur rCG_58936	326	3	21.3209	0.0192439	21.3714	0.0415234	1.03564	0.0304636	>0.05
B5DFC3	B5DFC3_RAT	Protein Sec23a (SEC23A (S. cerevisiae) (Predicted)) (Sec23 homolog A (S. cerevisiae))	Sec23a Sec23a_predicted rCG_62116	765	4	22.5187	0.14378	22.5885	0.131918	1.04953	0.104004	>0.05
B5DFD8	B5DFD8_RAT	SH3 domain-binding glutamic acid-rich-like protein	Sh3bgrl Sh3bgrl_predicted rCG_38007	114	2	20.6767	0.0572048	20.5938	0.106244	0.944152	0.0644227	>0.05
B5DFE0	B5DFE0_RAT	Mpp6 protein (Protein Mpp6) (RCG52465, isoform CRA_b)	Mpp6 rCG_52465	540	3	21.9581	0.0371952	21.9384	0.0426948	0.986438	0.0299838	>0.05
B5DFF7	B5DFF7_RAT	Dusp3 protein	Dusp3	185	4	24.5907	0.01633	24.5592	0.0240079	0.978429	0.0163101	>0.05
B5DFG5	B5DFG5_RAT	Protein Sept6 (RCG53214, isoform CRA_d) (Sept6 protein)	Sept6 Nkrf rCG_53214	427	13	27.1661	0.0385509	27.1924	0.0284978	1.01838	0.0200637	>0.05
B5DFI9	B5DFI9_RAT	Pdk3 protein (Protein Pdk3) (Pyruvate dehydrogenase kinase, isoenzyme 3 (Mapped), isoform CRA_a)	Pdk3 Pdk3_mapped rCG_36457	415	5	21.7513	0.0367708	21.7577	0.0286389	1.00443	0.0196884	>0.05
B5DFK1	B5DFK1_RAT	Coatomer subunit alpha	Copa	1224	4	21.2834	0.171725	21.6453	0.152465	1.2851	0.145245	>0.05
B5DFK6	B5DFK6_RAT	AP-3 complex subunit delta	Ap3d1 rCG_29405	1204	10	24.0766	0.031289	24.1274	0.0225297	1.03583	0.0165176	>0.05
B5DFM3	B5DFM3_RAT	Ly6h protein (Fragment)	Ly6h	181	2	26.032	0.101184	26.1129	0.119164	1.05764	0.0844997	>0.05
B5DFN2	B5DFN2_RAT	Adenosylhomocysteinase (EC 3.3.1.1) (Fragment)	Ahcyl1	482	5	23.9342	0.0191576	23.9405	0.0222116	1.00433	0.0155954	>0.05
B6DTP5	B6DTP5_RAT	DEAD (Asp-Glu-Ala-Asp) box polypeptide 5 (Fragment)	Ddx5	614	9	25.7108	0.177349	25.5947	0.122499	0.922665	0.0928975	>0.05
B6RK61	B6RK61_RAT	Myosin heavy chain 7B (Protein Myh7b)	Myh7b	1941	3	19.4361	0.0941974	19.5366	0.0772601	1.07212	0.0527688	>0.05
C7E1V2	C7E1V2_RAT	Inositol 1,4,5-trisphosphate receptor type 1	Itpr1	2748	13	26.3231	0.103181	26.4827	0.0491078	1.11702	0.0378073	>0.05
D0UFD0	D0UFD0_RAT	Prostate leucine zipper variant 2	PrLZ	224	4	21.968	0.0251809	21.9668	0.0346862	0.99913	0.0243181	>0.05
D3Z8I7	D3Z8I7_RAT	Protein Gstt3 (Similar to Glutathione S-transferase, theta 3 (Predicted))	Gstt3 RGD1562732_predicted rCG_60614	210	3	23.4999	0.0241295	23.5327	0.0289853	1.023	0.019988	>0.05
D3Z8P5	D3Z8P5_RAT	Uncharacterized protein (Fragment)	RGD1566085	319	5	22.6127	0.0383148	22.5423	0.0337956	0.952408	0.0228222	>0.05
D3Z8U8	D3Z8U8_RAT	Uncharacterized protein	0	315	4	28.907	0.0857918	28.7956	0.0762486	0.9257	0.0504234	>0.05
D3Z955	D3Z955_RAT	Protein Pgm2l1 (RCG40012, isoform CRA_a)	Pgm2l1 rCG_40012	621	5	22.7054	0.0764788	22.6211	0.0811653	0.943273	0.0520218	>0.05
D3Z9L0	D3Z9L0_RAT	Protein Agk (Similar to putative lipid kinase (Predicted), isoform CRA_c)	Agk RGD1562046_predicted rCG_27864	421	3	21.2981	0.0782248	21.2863	0.098594	0.991871	0.0630916	>0.05
D3Z9W4	D3Z9W4_RAT	Protein LOC100909620 (Fragment)	RGD1564380 LOC100909620	229	2	20.3301	0.141184	20.5806	0.0702922	1.18965	0.0605241	>0.05
D3ZA19	D3ZA19_RAT	Protein Satl1	Satl1	758	2	18.1159	0.144172	18.3595	0.134962	1.18392	0.105403	>0.05
D3ZA85	D3ZA85_RAT	Histone cell cycle regulation defective interacting protein 5 (Predicted), isoform CRA_a (Protein Nfu1)	Nfu1 Hirip5_predicted rCG_56512	253	2	20.6238	0.0588015	20.6941	0.0523896	1.04989	0.0383672	>0.05
D3ZAA0	D3ZAA0_RAT	PRA1 domain family 2 (Predicted) (Protein Praf2)	Praf2 Praf2_predicted rCG_22882	178	2	21.7921	0.0689094	21.7594	0.0451402	0.977619	0.030076	>0.05
D3ZAA9	D3ZAA9_RAT	Membrane protein, palmitoylated 2 (MAGUK p55 subfamily member 2), isoform CRA_a (Protein Mpp2)	Mpp2 rCG_34691	552	2	20.1112	0.043709	20.1228	0.0641933	1.00808	0.0463699	>0.05
D3ZAE5	D3ZAE5_RAT	Calcium-transporting ATPase (EC 3.6.3.8)	Atp2b1 rCG_48704	1220	32	28.961	0.0191557	28.9811	0.0215236	1.01402	0.0151678	>0.05
D3ZAF6	ATPK_RAT	ATP synthase subunit f, mitochondrial	Atp5j2	88	2	22.4044	0.325475	22.2388	0.370049	0.891558	0.332668	>0.05
D3ZAN3	D3ZAN3_RAT	Alpha glucosidase 2 alpha neutral subunit (Predicted) (Protein Ganab)	Ganab Ganab_predicted rCG_48309	797	3	21.2858	0.0363598	21.3251	0.0561712	1.02761	0.0400873	>0.05
D3ZAP9	D3ZAP9_RAT	Glycerol-3-phosphate dehydrogenase [NAD(+)] (EC 1.1.1.8)	Gpd1l	351	4	22.5777	0.0428997	22.6279	0.0599253	1.03537	0.0446102	>0.05
D3ZBC8	D3ZBC8_RAT	Protein Stk31	Stk31	924	2	21.0068	0.304139	21.5204	0.335442	1.42757	0.446474	>0.05
D3ZBS6	D3ZBS6_RAT	Protein RGD1559864	RGD1559864	400	14	26.9914	0.0268507	26.9662	0.0217202	0.982674	0.0145064	>0.05
D3ZBU7	D3ZBU7_RAT	Protein RGD1310819 (Fragment)	RGD1310819	1109	12	23.8121	0.00931332	23.8188	0.0221854	1.00469	0.0153224	>0.05
D3ZBX4	D3ZBX4_RAT	Ribosomal protein	RGD1559639	217	3	20.7285	0.0277446	20.7201	0.0337476	0.994218	0.0244444	>0.05
D3ZC07	D3ZC07_RAT	Protein Pkn3	Pkn3	958	3	20.7969	0.0874731	20.7786	0.103127	0.987389	0.0722072	>0.05
D3ZC15	D3ZC15_RAT	Protein Rltpr	Rltpr RGD1562390	1297	2	19.8297	0.0571539	19.917	0.0843876	1.06238	0.0633775	>0.05
D3ZC55	D3ZC55_RAT	Heat shock 70kDa protein 12A (Predicted), isoform CRA_a (Protein Hspa12a)	Hspa12a Hspa12a_predicted rCG_57494	675	20	27.311	0.019967	27.2899	0.0198148	0.985486	0.0136216	>0.05
D3ZC56	D3ZC56_RAT	Protein Dst (Fragment)	Dst	7350	5	22.3285	0.105466	22.1313	0.134944	0.872262	0.0917752	>0.05
D3ZC63	D3ZC63_RAT	Protein Cmpk2 (Thymidylate kinase family LPS-inducible member (Predicted))	Cmpk2 Tyki_predicted rCG_62144	417	3	21.6384	0.0856808	21.7971	0.0531028	1.11632	0.0399022	>0.05
D3ZC84	D3ZC84_RAT	Ubiquitin carboxyl-terminal hydrolase (EC 3.4.19.12)	Usp9x Usp9x_predicted rCG_42844	2547	5	21.6657	0.0360748	21.7005	0.0278767	1.02446	0.0197431	>0.05
D3ZCA0	D3ZCA0_RAT	Proline synthetase co-transcribed (Predicted) (Protein Prosc)	Prosc Prosc_predicted rCG_43085	275	2	20.9698	0.0529859	20.9342	0.041292	0.975643	0.0261334	>0.05
D3ZCV0	D3ZCV0_RAT	Protein Actn2 (RCG30552)	Actn2 rCG_30552	894	38	27.3295	0.0152134	27.3088	0.0131976	0.985775	0.00900749	>0.05
D3ZCZ9	D3ZCZ9_RAT	Protein LOC100912599 (RCG41951, isoform CRA_a)	LOC100912599 LOC679739 rCG_41951	116	5	25.4365	0.0204655	25.3934	0.0271848	0.97058	0.018668	>0.05
D3ZD04	D3ZD04_RAT	Dystrobrevin	Dtna	687	2	19.0426	0.140375	19.063	0.127586	1.01423	0.0906519	>0.05
D3ZD09	D3ZD09_RAT	Cytochrome c oxidase subunit 6B1	Cox6b1 LOC681754	86	5	28.0481	0.0350611	27.9987	0.024204	0.96631	0.0163623	>0.05
D3ZD73	D3ZD73_RAT	Protein Ddx6 (RCG58047)	Ddx6 rCG_58047	483	3	20.2354	0.113035	20.2866	0.103439	1.03611	0.0796877	>0.05
D3ZDT1	D3ZDT1_RAT	Protein Epb41l2	Epb41l2	919	15	26.0574	0.106472	26.182	0.096751	1.09021	0.0774697	>0.05
D3ZE15	D3ZE15_RAT	Protein LOC100911483 (RCG38845, isoform CRA_b)	LOC100911483 Ndufa13 rCG_38845	144	5	24.6173	0.0332947	24.6364	0.0347928	1.01332	0.0252538	>0.05
D3ZE32	D3ZE32_RAT	Protein Vat1l	Vat1l LOC361414	416	7	23.9827	0.0377434	24.0885	0.0249273	1.07616	0.0184022	<0.05
D3ZEI4	D3ZEI4_RAT	Protein Hepacam	Hepacam	417	4	23.9074	0.0339761	23.9018	0.0389487	0.996137	0.0265659	>0.05
D3ZER6	D3ZER6_RAT	Protein Tnpo2 (Transportin 2 (Importin 3, karyopherin beta 2b) (Predicted))	Tnpo2 Tnpo2_predicted rCG_51621	913	2	18.7666	0.168543	19.0661	0.185546	1.23079	0.177084	>0.05
D3ZF07	D3ZF07_RAT	Protein RGD1562402	RGD1562402	148	4	21.9033	0.0393051	21.8742	0.0735929	0.979986	0.046678	>0.05
D3ZF11	D3ZF11_RAT	Hepatitis B virus x interacting protein (Predicted), isoform CRA_a (Protein Lamtor5)	Lamtor5 Hbxip_predicted rCG_28577	156	2	19.1069	0.114086	19.1283	0.0662668	1.01493	0.0486317	>0.05
D3ZF13	D3ZF13_RAT	Acyl carrier protein	LOC683884 Ndufab1_predicted rCG_40178	156	5	24.2367	0.0459389	24.2357	0.0446792	0.999302	0.0318473	>0.05
D3ZF21	D3ZF21_RAT	Protein Gprin3	Gprin3	757	10	23.2968	0.039447	23.2798	0.0371661	0.988308	0.0255569	>0.05
D3ZFB6	PRRT2_RAT	Proline-rich transmembrane protein 2 (Dispanin subfamily B member 3) (DSPB3)	Prrt2	344	3	22.9884	0.172904	22.7726	0.105454	0.861081	0.0656782	>0.05
D3ZFD0	D3ZFD0_RAT	Uncharacterized protein	Myo18a	2044	8	20.6425	0.12806	20.7829	0.124512	1.10222	0.0939904	>0.05
D3ZFY8	D3ZFY8_RAT	Protein LOC100362142	LOC100912618 LOC100362142	147	4	25.3968	0.0466408	25.4406	0.0506517	1.0308	0.0369376	>0.05
D3ZG43	D3ZG43_RAT	NADH dehydrogenase (Ubiquinone) Fe-S protein 3 (Predicted), isoform CRA_c (Protein Ndufs3)	Ndufs3 Ndufs3_predicted rCG_26180	264	8	28.0396	0.0253157	28.0901	0.0345782	1.03568	0.0260576	>0.05
D3ZGL0	D3ZGL0_RAT	GRIP1-associated protein 1	Gripap1	793	5	21.6445	0.0848383	21.8166	0.0739858	1.12667	0.0594045	>0.05
D3ZGN2	D3ZGN2_RAT	Copine 5 protein (Copine V (Predicted)) (Protein Cpne5)	Cpne5 Cpne5_predicted rCG_60637	593	11	23.3709	0.0522127	23.3447	0.0294518	0.98201	0.019901	>0.05
D3ZGQ8	D3ZGQ8_RAT	Protein Rsf1	Rsf1	1444	3	24.7002	0.0674438	24.7443	0.0822299	1.03108	0.0604821	>0.05
D3ZGS3	OCRL_RAT	Inositol polyphosphate 5-phosphatase OCRL-1 (EC 3.1.3.36)	Ocrl	902	3	21.0007	0.0486371	21.0701	0.0405076	1.04929	0.0293803	>0.05
D3ZHI9	D3ZHI9_RAT	Protein Ppp2r5e (Protein phosphatase 2, regulatory subunit B (B56), epsilon isoform (Predicted))	Ppp2r5e Ppp2r5e_predicted rCG_62385	429	5	22.3915	0.133503	22.5715	0.104561	1.13285	0.0898099	>0.05
D3ZHX3	D3ZHX3_RAT	Protein Diras2	Diras2	199	3	19.828	0.0994459	19.7764	0.128658	0.964822	0.0894471	>0.05
D3ZHZ3	D3ZHZ3_RAT	Oxysterol-binding protein	Osbpl3 RGD1564287_predicted rCG_52333	855	2	18.197	0.266867	17.9968	0.238661	0.870415	0.132266	>0.05
D3ZIE9	D3ZIE9_RAT	Protein Aldh18a1 (Pyrroline-5-carboxylate synthetase (Glutamate gamma-semialdehyde synthetase) (Predicted))	Aldh18a1 Pycs_predicted rCG_57763	795	2	19.825	0.0446226	19.9211	0.0580861	1.06882	0.0438678	>0.05
D3ZIP8	D3ZIP8_RAT	Protein Endod1 (RCG31867)	Endod1 rCG_31867	500	3	22.1898	0.0534435	22.1695	0.0504952	0.986042	0.0344053	>0.05
D3ZJ01	D3ZJ01_RAT	Protein RGD1307235 (Similar to RIKEN cDNA 2310035C23 (Predicted))	RGD1307235 RGD1307235_predicted rCG_24062	1218	8	22.6124	0.0411303	22.6744	0.0329961	1.04391	0.0242817	>0.05
D3ZJ08	D3ZJ08_RAT	Histone H3	Hist2h3c2 Hist1h2ail Hist1h2ail1 Hist1h3a Hist1h3c Hist1h3f Hist2h3c LOC102549173 LOC679994 LOC684762 LOC684819 LOC684841 rCG_45187 rCG_45215 rCG_51970	136	3	27.5668	0.055283	27.5444	0.0582477	0.984582	0.0413535	>0.05
D3ZJ32	D3ZJ32_RAT	Protein Esyt2	Esyt2	845	2	20.2086	0.0743231	20.2998	0.105214	1.0653	0.0803848	>0.05
D3ZJ77	D3ZJ77_RAT	Calcium binding protein 39 (Predicted), isoform CRA_a (Protein Cab39)	Cab39 Cab39_predicted rCG_23700	196	2	20.721	0.0493535	20.6594	0.0404909	0.958215	0.0268822	>0.05
D3ZJH9	D3ZJH9_RAT	Malic enzyme	Me2	584	3	21.2009	0.0565186	21.1304	0.104644	0.952252	0.0648039	>0.05
D3ZJM7	D3ZJM7_RAT	Protein Mcph1	Mcph1	816	3	17.5422	0.175707	17.8006	0.195069	1.19615	0.180641	>0.05
D3ZJR1	D3ZJR1_RAT	Epidermal growth factor receptor pathway substrate 15-like 1 (Protein Eps15l1)	Eps15l1 LOC361120	878	7	23.4685	0.0265475	23.509	0.0267314	1.02841	0.0192305	>0.05
D3ZJX5	D3ZJX5_RAT	Protein LOC687295 (RCG54610, isoform CRA_a)	Timm50 LOC687295 rCG_54610	353	3	21.4385	0.05385	21.5239	0.066313	1.06099	0.0504879	>0.05
D3ZKY6	D3ZKY6_RAT	Protein Ankrd63	Ankrd63	390	5	22.6729	0.0320668	22.7327	0.0340452	1.04233	0.0260197	>0.05
D3ZL49	D3ZL49_RAT	Protein Hmg1l1	Hmg1l1 LOC100909581	215	4	24.3737	0.0789008	24.4593	0.0536205	1.06115	0.0406105	>0.05
D3ZLT1	D3ZLT1_RAT	NADH dehydrogenase (Ubiquinone) 1 beta subcomplex, 7 (Predicted) (Protein Ndufb7)	Ndufb7 Ndufb7_predicted rCG_51107	137	3	24.2501	0.0669995	24.2461	0.0661227	0.997255	0.0453052	>0.05
D3ZLY9	D3ZLY9_RAT	Histone H2B	Hist1h2bh Hist1h2bf Hist1h2bl rCG_23123	126	7	28.6301	0.0486293	28.581	0.0430814	0.966604	0.0289312	>0.05
D3ZM21	D3ZM21_RAT	Catechol-O-methyltransferase domain containing 1 (Predicted), isoform CRA_a (Protein Comtd1)	Comtd1 Comtd1_predicted rCG_41841	262	2	20.8205	0.0308355	20.8738	0.0869374	1.03765	0.0631853	>0.05
D3ZN21	D3ZN21_RAT	Protein Ddx3y (RCG20177)	Ddx3y RGD1309586 rCG_20177	659	4	24.1116	0.0507321	24.0836	0.0525349	0.980791	0.0360204	>0.05
D3ZNK1	D3ZNK1_RAT	Protein Mtx3	Mtx3 LOC688905	311	2	19.7756	0.110456	20.0151	0.0392358	1.18065	0.032228	>0.05
D3ZNQ6	D3ZNQ6_RAT	Protein Ube2m (Ubiquitin-conjugating enzyme E2M (UBC12 homolog, yeast) (Predicted), isoform CRA_a)	Ube2m Ube2m_predicted rCG_27455	183	2	21.5408	0.0647243	21.4789	0.0516103	0.957997	0.0334331	>0.05
D3ZP47	D3ZP47_RAT	Phosphohistidine phosphatase 1 (Predicted), isoform CRA_a (Protein Phpt1)	Phpt1 Phpt1_predicted rCG_45807	124	4	21.4487	0.0732665	21.3967	0.0974951	0.964618	0.0579306	>0.05
D3ZPC4	D3ZPC4_RAT	Neural cell adhesion molecule L1	L1cam	1255	13	24.9128	0.0247122	24.9321	0.0220232	1.01351	0.0155721	>0.05
D3ZPJ0	D3ZPJ0_RAT	Protein Shisa7	Shisa7	558	2	19.8333	0.0487134	19.7973	0.0459075	0.975352	0.0320721	>0.05
D3ZPU3	D3ZPU3_RAT	Estradiol 17-beta-dehydrogenase 12	Hsd17b12	290	3	21.5679	0.0661538	21.6149	0.0561968	1.03311	0.0386838	>0.05
D3ZQD3	D3ZQD3_RAT	2-oxoglutarate dehydrogenase, mitochondrial (Oxoglutarate dehydrogenase-like (Predicted), isoform CRA_a)	Ogdhl Ogdhl_predicted rCG_42296	1029	9	24.6842	0.17224	24.9276	0.102222	1.18373	0.0770114	>0.05
D3ZQG6	TRIM2_RAT	Tripartite motif-containing protein 2 (EC 6.3.2.-) (E3 ubiquitin-protein ligase TRIM2)	Trim2	744	8	23.2215	0.0348286	23.231	0.0255022	1.00659	0.0179744	>0.05
D3ZQL7	D3ZQL7_RAT	Protein Tppp (Similar to 25 kDa brain-specific protein (P25-alpha) (Predicted), isoform CRA_a)	Tppp RGD1310121_predicted rCG_42002	218	5	28.0443	0.0744003	27.9437	0.0561316	0.932633	0.037036	>0.05
D3ZQR3	D3ZQR3_RAT	Protein Arpp21	Arpp21	808	2	21.4547	0.0989735	21.5256	0.0976311	1.05038	0.0714736	>0.05
D3ZR34	D3ZR34_RAT	Protein Psd3 (Fragment)	Psd3	1039	7	23.4119	0.0260534	23.4279	0.0217855	1.01111	0.0150613	>0.05
D3ZR53	D3ZR53_RAT	Protein phosphatase 1 regulatory subunit 12	Ppp1r12a	1032	3	21.1845	0.0241745	21.1739	0.0225732	0.992727	0.0153039	>0.05
D3ZRM9	D3ZRM9_RAT	60S ribosomal protein L13	LOC100360491	211	4	22.7168	0.0322614	22.6504	0.0513193	0.955025	0.0332707	>0.05
D3ZRN3	D3ZRN3_RAT	Protein Actbl2 (Similar to cytoplasmic beta-actin (Predicted))	Actbl2 RGD1309504_predicted rCG_44795	376	11	30.7646	0.0319815	30.7323	0.0408963	0.977831	0.0288681	>0.05
D3ZRX4	D3ZRX4_RAT	Microtubule-associated protein	Mapt	498	17	28.6749	0.0373123	28.6361	0.0436247	0.973509	0.0290164	>0.05
D3ZS58	D3ZS58_RAT	NADH dehydrogenase [ubiquinone] 1 alpha subcomplex subunit 2	Ndufa2 Ndufa2_predicted rCG_49583	97	4	25.1467	0.0231934	25.1573	0.0330522	1.00739	0.0234472	>0.05
D3ZSN6	D3ZSN6_RAT	Kinesin-like protein (Fragment)	Kif21a	1614	10	22.7455	0.062235	22.9039	0.0655829	1.11605	0.0504234	>0.05
D3ZSY8	D3ZSY8_RAT	Protein Tbc1d10b (TBC1 domain family, member 10b (Predicted))	Tbc1d10b Tbc1d10b_predicted rCG_40210	795	5	20.9662	0.151467	20.7262	0.289625	0.846754	0.116418	>0.05
D3ZSZ6	D3ZSZ6_RAT	Diacylglycerol kinase (DAG kinase) (EC 2.7.1.107)	Dgkh	1155	5	20.7891	0.170256	20.4354	0.10543	0.782583	0.0556717	>0.05
D3ZT16	D3ZT16_RAT	Protein Map6d1 (Putative uncharacterized protein RGD1560102_predicted)	Map6d1 RGD1560102_predicted rCG_36606	191	2	22.0563	0.0389419	22.0681	0.0483234	1.00819	0.0329764	>0.05
D3ZT36	D3ZT36_RAT	Protein Adam23	Adam23	828	4	21.9587	0.0715937	21.9752	0.0885835	1.01148	0.0665977	>0.05
D3ZTB5	D3ZTB5_RAT	Protein S100a13	S100a13	98	2	22.0228	0.0271438	21.9768	0.0308456	0.968606	0.0213436	>0.05
D3ZU22	D3ZU22_RAT	Protein LOC100361311	LOC100361311 LOC100910109	266	6	22.4553	0.0334964	22.4064	0.0399859	0.966718	0.0265126	>0.05
D3ZU84	D3ZU84_RAT	Protein Stxbp5l	Stxbp5l	1136	3	21.1825	0.0820382	21.1447	0.0492252	0.974191	0.0345695	>0.05
D3ZUB0	D3ZUB0_RAT	Protein Rcn1 (Reticulocalbin 1 (Predicted), isoform CRA_a)	Rcn1 Rcn1_predicted rCG_26388	325	6	23.526	0.058742	23.6057	0.0608956	1.05673	0.0473056	>0.05
D3ZUP5	D3ZUP5_RAT	Protein Brk1 (RCG56448, isoform CRA_a)	Brk1 rCG_56448	75	3	21.5789	0.0926835	21.5102	0.119994	0.953506	0.086496	>0.05
D3ZUX5	D3ZUX5_RAT	Coiled-coil-helix-coiled-coil-helix domain containing 3 (Predicted), isoform CRA_a (Protein Chchd3)	Chchd3 Chchd3_predicted rCG_28180	227	6	24.309	0.0196558	24.2788	0.0217748	0.979226	0.0148453	>0.05
D3ZUY8	D3ZUY8_RAT	Adaptor protein complex AP-2, alpha 1 subunit (Predicted) (Protein Ap2a1)	Ap2a1 Ap2a1_predicted rCG_54084	977	29	26.8829	0.0257649	26.9263	0.0311437	1.03051	0.0220222	>0.05
D3ZV39	D3ZV39_RAT	Protein Armcx4	Armcx4	2344	5	22.5428	0.160716	22.9594	0.109177	1.3348	0.106367	<0.05
D3ZVF3	D3ZVF3_RAT	Phosphoinositide-3-kinase, class 2, beta polypeptide (Predicted) (Protein Pik3c2b)	Pik3c2b Pik3c2b_predicted rCG_46177	1621	2	19.1678	0.0624804	18.9881	0.155275	0.882919	0.0975617	>0.05
D3ZVN3	D3ZVN3_RAT	F-box only protein 10 (Predicted), isoform CRA_a (Protein Fbxo10)	Fbxo10 Fbxo10_predicted rCG_55077	950	3	21.8174	0.044708	21.8844	0.063198	1.04748	0.0465306	>0.05
D3ZVQ0	D3ZVQ0_RAT	Ubiquitin carboxyl-terminal hydrolase (EC 3.4.19.12)	Usp5 LOC100911959 Usp5_predicted rCG_29800	858	11	25.5939	0.0275191	25.6073	0.0345755	1.00929	0.023454	>0.05
D3ZW08	D3ZW08_RAT	Adenylosuccinate lyase (ASL) (EC 4.3.2.2) (Adenylosuccinase)	Adsl Adsl_predicted rCG_60301	484	8	23.0863	0.0347028	23.1115	0.0538752	1.01758	0.0359917	>0.05
D3ZW55	ITPA_RAT	Inosine triphosphate pyrophosphatase (ITPase) (Inosine triphosphatase) (EC 3.6.1.19) (Non-canonical purine NTP pyrophosphatase) (Non-standard purine NTP pyrophosphatase) (Nucleoside-triphosphate diphosphatase) (Nucleoside-triphosphate pyrophosphatase) (NTPase)	Itpa	198	5	24.8359	0.0359249	24.8108	0.0483657	0.982735	0.0325517	>0.05
D3ZWQ0	D3ZWQ0_RAT	Protein Prrt3	Prrt3	974	2	21.1743	0.0851067	21.364	0.0251932	1.14051	0.0198545	<0.05
D3ZWV7	D3ZWV7_RAT	Succinate-semialdehyde dehydrogenase, mitochondrial	Aldh5a1	495	15	26.9725	0.0151341	26.9859	0.0191842	1.00932	0.0134966	>0.05
D3ZX10	D3ZX10_RAT	Protein Bahcc1 (Fragment)	Bahcc1	2596	4	18.555	0.255449	18.0412	0.311176	0.700404	0.159435	>0.05
D3ZX82	D3ZX82_RAT	Cytoplasmic FMR1 interacting protein 2 (Predicted) (Protein Cyfip2)	Cyfip2 Cyfip2_predicted rCG_35313	593	7	24.4313	0.0286562	24.4302	0.0246221	0.999248	0.0165128	>0.05
D3ZY46	D3ZY46_RAT	Engulfment and cell motility 1, ced-12 homolog (C. elegans) (Predicted), isoform CRA_a (Protein Elmo1)	Elmo1 Elmo1_predicted rCG_23103	727	2	19.3262	0.115335	19.6099	0.0375061	1.21731	0.03166	<0.05
D3ZYH3	D3ZYH3_RAT	Protein LOC100912928 (RCG22822)	LOC100912928 Nudt10 Nudt11 rCG_22822	164	2	21.102	0.0495964	21.1061	0.0549253	1.0028	0.0391372	>0.05
D3ZZ21	D3ZZ21_RAT	NADH dehydrogenase (Ubiquinone) 1 beta subcomplex, 6 (Predicted) (Protein Ndufb6)	Ndufb6 Ndufb6_predicted rCG_55056	128	3	24.1062	0.0646714	24.032	0.0706711	0.949853	0.0471491	>0.05
D3ZZK3	D3ZZK3_RAT	Receptor protein-tyrosine kinase (EC 2.7.10.1)	Epha4	986	3	22.0634	0.0390396	22.0781	0.032245	1.01022	0.022937	>0.05
D3ZZM9	D3ZZM9_RAT	Protein Ccsap (Similar to 1700054N08Rik protein (Predicted))	Ccsap RGD1563235_predicted rCG_50909	252	3	20.1194	0.0702313	20.0966	0.0807789	0.984286	0.0589667	>0.05
D3ZZQ0	D3ZZQ0_RAT	Protein Tnik (Similar to Traf2 and NCK interacting kinase, splice variant 4 (Predicted), isoform CRA_a)	Tnik RGD1561817_predicted rCG_41596	1354	3	19.8721	0.105246	19.77	0.0830975	0.931647	0.0498749	>0.05
D3ZZR9	D3ZZR9_RAT	Peptidyl-prolyl cis-trans isomerase	Fkbp2 Fkbp2_predicted rCG_47860	140	3	22.2447	0.0397007	22.2608	0.046906	1.0112	0.033405	>0.05
D4A055	D4A055_RAT	Calcium channel, voltage-dependent, beta 4 subunit, isoform CRA_b (Protein Cacnb4)	Cacnb4 rCG_37774	486	3	22.4859	0.0632389	22.6034	0.0969094	1.08482	0.0853953	>0.05
D4A0A1	D4A0A1_RAT	Protein LOC100363248	Soga3 LOC100363248	944	4	20.355	0.070722	20.302	0.0675542	0.963915	0.0454739	>0.05
D4A0E2	D4A0E2_RAT	Protein Napg (RCG46917, isoform CRA_b)	Napg rCG_46917	230	5	25.6059	0.0474246	25.644	0.0636078	1.02677	0.0441943	>0.05
D4A0H4	D4A0H4_RAT	Cullin 2 (Predicted), isoform CRA_a (Protein Cul2)	Cul2 Cul2_predicted rCG_45320	725	3	20.9921	0.122191	21.1041	0.195068	1.08071	0.170905	>0.05
D4A0I5	D4A0I5_RAT	DnaJ (Hsp40) homolog, subfamily C, member 6 (Predicted) (Protein Dnajc6)	Dnajc6 Dnajc6_predicted rCG_53429	911	10	23.4283	0.0322472	23.4197	0.0342483	0.994074	0.0231556	>0.05
D4A0T0	D4A0T0_RAT	Protein Ndufb10 (RCG32945)	Ndufb10 rCG_32945	176	6	26.3584	0.0172719	26.3304	0.0170957	0.980773	0.0116788	>0.05
D4A0X3	D4A0X3_RAT	Protein Btbd8	Btbd8 LOC100364240	1367	2	21.6077	0.0682042	21.6345	0.0665908	1.01879	0.0501495	>0.05
D4A133	D4A133_RAT	Protein Atp6v1a (RCG52629)	Atp6v1a rCG_52629	617	31	29.1733	0.0289512	29.1442	0.0285688	0.980007	0.0196462	>0.05
D4A148	D4A148_RAT	Uncharacterized protein	Zfr2	872	2	20.5392	0.143751	20.7283	0.0655686	1.14006	0.0499282	>0.05
D4A1A5	D4A1A5_RAT	Protein Ppp2r5c	Ppp2r5c	524	4	23.2834	0.109283	23.349	0.136696	1.04645	0.0935375	>0.05
D4A1G1	D4A1G1_RAT	Acylphosphatase (EC 3.6.1.7)	Acyp2 rCG_23240	124	3	21.6376	0.0540483	21.6727	0.0640183	1.02463	0.0451288	>0.05
D4A1G8	D4A1G8_RAT	Protein Cep170b	Cep170b	1575	5	21.5781	0.039472	21.5785	0.0483919	1.00026	0.0341963	>0.05
D4A2G9	D4A2G9_RAT	Protein RGD1565297 (RCG36598)	Ranbp1 RGD1565297 rCG_36598	203	3	23.2711	0.0422851	23.2687	0.0541734	0.998286	0.0368697	>0.05
D4A3B0	D4A3B0_RAT	Protein Tln2	Tln2	2132	13	22.8821	0.0590356	22.8676	0.0674577	0.989989	0.0464558	>0.05
D4A3C2	D4A3C2_RAT	Protein RGD1304884 (Similar to RIKEN cDNA 6430548M08 (Predicted), isoform CRA_b)	RGD1304884 RGD1304884_predicted rCG_51327	407	5	22.7398	0.0947723	22.584	0.107685	0.897611	0.059079	>0.05
D4A3V2	D4A3V2_RAT	NADH dehydrogenase [ubiquinone] 1 alpha subcomplex subunit 6	Ndufa6 Ndufa6_predicted rCG_59408	130	3	24.925	0.0508596	24.8783	0.0356248	0.968162	0.0246362	>0.05
D4A3Z3	D4A3Z3_RAT	Protein Tbc1d24 (Similar to CG9339-PA (Predicted))	Tbc1d24 RGD1306143_predicted rCG_35255	556	2	21.2743	0.0226312	21.3302	0.0642208	1.03953	0.049023	>0.05
D4A435	D4A435_RAT	Protein Icam5 (RCG31795)	Icam5 rCG_31795	917	12	25.0136	0.0166393	25.0425	0.0142472	1.0202	0.00998427	>0.05
D4A4T9	CHRD1_RAT	Cysteine and histidine-rich domain-containing protein 1 (CHORD domain-containing protein 1) (CHP-1) (Morgana)	Chordc1	331	6	23.9812	0.0621458	23.8485	0.10919	0.912064	0.0694776	>0.05
D4A565	D4A565_RAT	NADH dehydrogenase (Ubiquinone) 1 beta subcomplex, 5 (Predicted), isoform CRA_b (Protein Ndufb5)	Ndufb5 Ndufb5_predicted rCG_41492	189	4	24.8386	0.0301888	24.8251	0.0175637	0.990675	0.0123394	>0.05
D4A5I9	D4A5I9_RAT	Protein Myo6	Myo6	1261	3	21.2903	0.0331125	21.2773	0.0372735	0.991044	0.0255268	>0.05
D4A5L9	D4A5L9_RAT	Protein LOC690675	LOC679794 LOC684936 LOC690675	105	7	27.9673	0.0279369	27.9949	0.0445576	1.01931	0.0316795	>0.05
D4A5X7	D4A5X7_RAT	Ganglioside-induced differentiation-associated-protein 1 (Predicted) (Protein Gdap1)	Gdap1 Gdap1_predicted rCG_30362	358	6	24.7724	0.0438545	24.851	0.0345086	1.05595	0.0257561	>0.05
D4A644	D4A644_RAT	Protein Map7d1 (RCG31495)	Map7d1 rCG_31495	817	3	21.1711	0.0527549	21.1355	0.0727671	0.975645	0.0485463	>0.05
D4A6C5	D4A6C5_RAT	Protein Arhgap1	Arhgap1	439	4	21.7329	0.0546548	21.6603	0.0431566	0.950871	0.0277389	>0.05
D4A6C9	D4A6C9_RAT	Protein Tom1l2 (Target of myb1-like 2 (Chicken) (Predicted), isoform CRA_a)	Tom1l2 Tom1l2_predicted rCG_33818	284	3	21.2508	0.0433744	21.2232	0.0442605	0.981038	0.0303674	>0.05
D4A6H8	D4A6H8_RAT	Protein Ctnna2 (Fragment)	Ctnna2	922	12	24.4669	0.0390562	24.4817	0.0298129	1.01033	0.020998	>0.05
D4A6K9	D4A6K9_RAT	Active BCR-related gene (Predicted) (Protein Abr)	Abr Abr_predicted rCG_33397	859	4	21.9463	0.0420753	21.9942	0.0402734	1.0338	0.0285986	>0.05
D4A6X4	D4A6X4_RAT	Acylphosphatase (EC 3.6.1.7)	Acyp1 Acyp1_predicted rCG_20688	99	2	21.8871	0.0477578	21.9042	0.0407866	1.0119	0.0290071	>0.05
D4A746	D4A746_RAT	GDP-mannose pyrophosphorylase B (Predicted), isoform CRA_a (Protein Gmppb)	Gmppb Gmppb_predicted rCG_25921	360	2	19.4417	0.0545019	19.4974	0.0635284	1.03938	0.0449739	>0.05
D4A781	D4A781_RAT	Protein Ipo5	Ipo5	1097	4	20.751	0.0582416	20.7761	0.0417691	1.01751	0.0273076	>0.05
D4A7B4	D4A7B4_RAT	Protein LOC100360611	LOC100360611	160	2	20.6372	0.0538469	20.5957	0.0843742	0.971624	0.0543096	>0.05
D4A7H9	D4A7H9_RAT	CHMP family, member 7 (Predicted), isoform CRA_a (Protein Chmp7)	Chmp7 Chmp7_predicted rCG_37053	450	2	21.7701	0.0806955	21.7884	0.07505	1.01281	0.0592595	>0.05
D4A7L4	D4A7L4_RAT	NADH dehydrogenase (Ubiquinone) 1 beta subcomplex, 11 (Predicted) (Protein Ndufb11)	Ndufb11 Ndufb11_predicted rCG_42934	151	3	24.4053	0.0869956	24.2506	0.0615636	0.898347	0.0393334	>0.05
D4A7N1	MIC25_RAT	MICOS complex subunit Mic25 (Coiled-coil-helix-coiled-coil-helix domain-containing protein 6)	Chchd6 Mic25	261	4	22.5179	0.0285145	22.5229	0.0408184	1.00345	0.0286398	>0.05
D4A830	D4A830_RAT	Protein Ppa2	Ppa2	304	3	22.2174	0.0854452	22.136	0.0690666	0.945138	0.0464592	>0.05
D4A8H8	D4A8H8_RAT	Cytoplasmic FMR1 interacting protein 1 (Predicted) (Protein Cyfip1)	Cyfip1 Cyfip1_predicted rCG_45119	1253	13	24.4958	0.0249353	24.5127	0.0258101	1.01178	0.0187269	>0.05
D4A8U7	D4A8U7_RAT	Dynactin 1, isoform CRA_a (Dynactin subunit 1)	Dctn1 rCG_56074	1281	17	24.5306	0.0467629	24.5593	0.0534717	1.0201	0.0378796	>0.05
D4A9D6	D4A9D6_RAT	DEAH (Asp-Glu-Ala-His) box polypeptide 9 (Predicted) (Protein Dhx9)	Dhx9 Dhx9_predicted rCG_46521	1174	4	21.3151	0.0341886	21.3525	0.0504876	1.02624	0.0380032	>0.05
D4A9D8	D4A9D8_RAT	Oxysterol-binding protein	Osbp Osbp_predicted rCG_47114	682	4	21.2532	0.0492482	21.2603	0.0624067	1.005	0.0437993	>0.05
D4A9H7	D4A9H7_RAT	Protein Spata2L (Similar to RIKEN cDNA 2610039E05 (Predicted), isoform CRA_a)	Spata2L RGD1560840_predicted rCG_51414	426	2	21.3897	0.0268824	21.2848	0.0454103	0.929871	0.02929	>0.05
D4A9L2	D4A9L2_RAT	Protein Srsf1 (RCG34610, isoform CRA_c)	Srsf1 rCG_34610	248	3	22.2526	0.0486256	22.1993	0.0628771	0.963754	0.0407525	>0.05
D4AA63	D4AA63_RAT	Protein Ubqln2 (Ubiquilin 2 (Predicted))	Ubqln2 Ubqln2_predicted rCG_38924	638	8	24.546	0.043144	24.5891	0.0415729	1.03033	0.0298412	>0.05
D4AAE9	D4AAE9_RAT	Protein Cisd2 (Similar to RIKEN cDNA 1500009M05 (Predicted))	Cisd2 RGD1566242_predicted rCG_28708	135	2	21.5776	0.0474223	21.5308	0.054003	0.968096	0.036506	>0.05
D4AB01	D4AB01_RAT	Histidine triad nucleotide binding protein 2 (Predicted), isoform CRA_a (Protein Hint2)	Hint2 Hint2_predicted rCG_54875	163	3	22.1025	0.0646306	22.1338	0.0585384	1.02193	0.0424369	>0.05
D4AB03	D4AB03_RAT	Protein Fam120a	Fam120a	1115	2	18.5532	0.0889995	18.6525	0.110345	1.0712	0.0898636	>0.05
D4AB17	D4AB17_RAT	Protein LOC100912917	LOC100912917 Pfas	1273	4	21.3179	0.0588964	21.366	0.0729243	1.03387	0.0538751	>0.05
D4AB25	D4AB25_RAT	Protein Fjx1 (RCG27341)	Fjx1 rCG_27341	449	2	20.9894	0.11577	21.0609	0.1334	1.05084	0.108958	>0.05
D4ABF0	D4ABF0_RAT	Synaptonemal complex protein SC65	P3h4 Leprel4	431	2	21.3355	0.0824844	21.3348	0.0666581	0.999499	0.0467245	>0.05
D4ABI7	D4ABI7_RAT	Protein LOC100365676 (Similar to Butyrate-induced transcript 1 (Predicted))	LOC100365676 Ptplad1 RGD1565496_predicted rCG_58140	362	3	21.459	0.048278	21.525	0.0618814	1.04682	0.0476207	>0.05
D4ABT8	D4ABT8_RAT	Protein Hnrnpul2	Hnrnpul2	745	2	20.2852	0.0872512	20.3479	0.0483424	1.04437	0.0349884	>0.05
D4AC23	D4AC23_RAT	Protein Cct7 (RCG55994, isoform CRA_c)	Cct7 rCG_55994	544	9	24.0889	0.0180683	24.0886	0.0242585	0.999793	0.0168421	>0.05
D4ACB8	D4ACB8_RAT	Chaperonin subunit 8 (Theta) (Predicted), isoform CRA_a (Protein Cct8)	Cct8 Cct8_predicted rCG_58706	548	17	25.4042	0.164346	25.4784	0.127505	1.05277	0.104618	>0.05
D4ADS4	D4ADS4_RAT	Protein Mgst3 (RCG46430)	Mgst3 rCG_46430	152	6	23.0355	0.0887606	22.9365	0.110393	0.933713	0.0691851	>0.05
D4AE00	D4AE00_RAT	AP-3 complex subunit beta	Ap3b2	1082	8	23.0421	0.0304855	22.9868	0.0231742	0.962396	0.0151742	>0.05
D4AE68	D4AE68_RAT	Guanine nucleotide binding protein, alpha q polypeptide, isoform CRA_a (Guanine nucleotide-binding protein G(q) subunit alpha)	Gnaq rCG_47814	359	8	25.428	0.0338705	25.4267	0.0591569	0.999106	0.0395347	>0.05
D4AEP0	D4AEP0_RAT	Adenylosuccinate synthetase isozyme 2 (AMPSase 2) (AdSS 2) (EC 6.3.4.4) (Adenylosuccinate synthetase, acidic isozyme) (Adenylosuccinate synthetase, liver isozyme) (IMP--aspartate ligase 2)	Adss Adss2 Adss_predicted rCG_20425	456	4	22.8586	0.0806133	22.7859	0.0809536	0.95086	0.0517145	>0.05
E9PSX6	E9PSX6_RAT	Calcium-transporting ATPase (EC 3.6.3.8)	Atp2a2	999	22	26.6753	0.030166	26.7488	0.0246006	1.05226	0.0180118	>0.05
E9PT22	E9PT22_RAT	Uncharacterized protein	0	1271	2	20.235	0.0882868	20.4062	0.0573177	1.12593	0.0434454	>0.05
E9PT53	E9PT53_RAT	Protein Wfs1 (Wolfram syndrome 1 homolog (Human))	Wfs1 rCG_36058	890	3	21.0875	0.0514583	21.1656	0.041754	1.05567	0.0308804	>0.05
E9PTD2	E9PTD2_RAT	Phosphatidylinositol-binding clathrin assembly protein	Picalm	597	6	25.5183	0.0572166	25.5266	0.071838	1.00574	0.0454123	>0.05
E9PTK8	E9PTK8_RAT	Protein Lmo7	Lmo7	1726	8	23.8689	0.0666671	23.6653	0.0363242	0.868382	0.0217468	<0.05
E9PTW1	E9PTW1_RAT	Protein Scamp3	Scamp3	350	5	23.0557	0.0221182	23.0152	0.0261574	0.972359	0.0181097	>0.05
E9PTX9	E9PTX9_RAT	Protein Slc12a2	Slc12a2	1203	5	22.9221	0.0239878	22.9452	0.0261081	1.01617	0.0182959	>0.05
E9PU16	E9PU16_RAT	Ras-related protein Rab-1A	Rab1	300	6	25.9341	0.0246002	25.927	0.0279242	0.995122	0.0194292	>0.05
E9PU24	E9PU24_RAT	Protein Dnah11 (Fragment)	Dnah11	2808	2	20.963	0.0590939	20.9371	0.057492	0.982209	0.0384127	>0.05
F1LM19	F1LM19_RAT	Alpha-2-HS-glycoprotein	Ahsg	351	7	23.4441	0.0392277	23.5114	0.0465654	1.04777	0.0336535	>0.05
F1LM33	F1LM33_RAT	Leucine-rich PPR motif-containing protein, mitochondrial (Leucine-rich PPR-motif containing, isoform CRA_b)	Lrpprc rCG_61623	1392	12	22.8475	0.0370301	22.8755	0.0342556	1.0196	0.0239993	>0.05
F1LM42	F1LM42_RAT	Protein Ank2	Ank2	3965	49	28.1255	0.243736	28.2502	0.311457	1.09022	0.223226	>0.05
F1LM47	F1LM47_RAT	Succinyl-CoA ligase subunit beta (EC 6.2.1.-)	Sucla2	465	16	26.7978	0.03979	26.7734	0.0332194	0.983258	0.0226996	>0.05
F1LMC2	F1LMC2_RAT	Xin actin-binding repeat-containing protein 2	Xirp2	3302	5	20.283	0.125588	20.1709	0.124787	0.925247	0.0999236	>0.05
F1LMH0	F1LMH0_RAT	Neuronal-specific septin-3 (Fragment)	42250	358	7	25.1469	0.0377803	25.1392	0.0249946	0.994696	0.0174083	>0.05
F1LMS1	F1LMS1_RAT	Voltage-dependent R-type calcium channel subunit alpha-1E	Cacna1e	2296	6	21.2655	0.047926	21.2945	0.0630429	1.02035	0.0460321	>0.05
F1LMV8	F1LMV8_RAT	Protein kinase C (EC 2.7.11.13)	Prkce	736	11	23.8863	0.0367824	23.9218	0.0368023	1.02492	0.026565	>0.05
F1LMZ8	PSD11_RAT	26S proteasome non-ATPase regulatory subunit 11 (26S proteasome regulatory subunit RPN6)	Psmd11	422	2	18.7828	0.117537	18.6969	0.173612	0.942176	0.129572	>0.05
F1LN76	F1LN76_RAT	Protein Cfap43 (Fragment)	Cfap43 Wdr96	1665	5	22.2584	0.0621818	22.3081	0.0725356	1.0351	0.0562203	>0.05
F1LN88	F1LN88_RAT	Aldehyde dehydrogenase, mitochondrial (RCG21519, isoform CRA_a)	Aldh2 rCG_21519	519	13	25.4213	0.0411684	25.4778	0.0402653	1.0399	0.0295708	>0.05
F1LN92	F1LN92_RAT	Protein Afg3l2	Afg3l2	802	3	20.1779	0.0516121	20.209	0.0642437	1.02178	0.0448747	>0.05
F1LNB2	F1LNB2_RAT	Phosphatase and actin regulator	Phactr1	580	12	25.2881	0.0269497	25.3	0.0307227	1.00826	0.0216518	>0.05
F1LNK0	F1LNK0_RAT	Microtubule-associated protein	Map2	1860	69	29.7014	0.0272941	29.7023	0.0425741	1.00062	0.0296542	>0.05
F1LNR0	F1LNR0_RAT	Protein Clasp1	Clasp1	1471	7	22.2476	0.0439256	22.3586	0.0476257	1.07995	0.0364634	>0.05
F1LP01	F1LP01_RAT	Diacylglycerol kinase (DAG kinase) (EC 2.7.1.107)	Dgkb rCG_62181	802	15	25.2829	0.0396241	25.3039	0.0316517	1.01468	0.0220367	>0.05
F1LP21	F1LP21_RAT	Protein Timm8a1	Timm8a1	97	3	22.6863	0.0325069	22.7116	0.0412317	1.01771	0.0290832	>0.05
F1LPB9	F1LPB9_RAT	Rabphilin-3A	Rph3a	684	11	26.5871	0.017677	26.6064	0.0158872	1.01348	0.0112404	>0.05
F1LPG5	F1LPG5_RAT	Protein LOC691675	LOC688963 LOC691675	129	4	25.6417	0.0161109	25.6104	0.0199752	0.978541	0.013246	>0.05
F1LPM3	F1LPM3_RAT	Sorbin and SH3 domain-containing protein 2	Sorbs2	1196	2	20.341	0.0686848	20.3771	0.0736445	1.02537	0.0534477	>0.05
F1LPP3	F1LPP3_RAT	Protein kinase C and casein kinase substrate in neurons protein 1	Pacsin1	441	15	28.4642	0.0207754	28.4683	0.0294802	1.00285	0.020579	>0.05
F1LPP6	F1LPP6_RAT	A-kinase anchor protein 5	Akap5	714	15	26.6945	0.022313	26.7105	0.0234068	1.0112	0.016509	>0.05
F1LPS8	F1LPS8_RAT	Transcriptional activator protein Pur-alpha	Pura	303	5	25.9219	0.0373118	26.0081	0.0419088	1.06156	0.0299217	>0.05
F1LPV0	F1LPV0_RAT	Protein Nars (RCG46601, isoform CRA_b)	Nars rCG_46601	558	8	23.4133	0.0603445	23.4756	0.0655418	1.04412	0.0478774	>0.05
F1LPV8	F1LPV8_RAT	Succinyl-CoA ligase subunit beta (EC 6.2.1.-)	Suclg2	431	2	20.7015	0.198388	20.3856	0.0938715	0.803328	0.0550925	>0.05
F1LQ48	F1LQ48_RAT	Protein Fblim1	Hnrnpl Fblim1	623	13	24.3446	0.0663801	24.1982	0.0709157	0.903495	0.0444475	>0.05
F1LQI1	F1LQI1_RAT	Hydroxyacyl glutathione hydrolase (Hydroxyacylglutathione hydrolase, mitochondrial)	Hagh rCG_35488	309	5	22.7765	0.0422173	22.834	0.0438559	1.04065	0.0322721	>0.05
F1LQQ1	F1LQQ1_RAT	Malic enzyme (Fragment)	Me1	549	2	20.4597	0.0571705	20.4904	0.060741	1.02154	0.0407385	>0.05
F1LQW3	F1LQW3_RAT	Protein Sfpq (Fragment)	Sfpq	606	7	23.2764	0.0415392	23.2817	0.0661049	1.00369	0.0496723	>0.05
F1LQX4	RHG44_RAT	Rho GTPase-activating protein 44 (Rho-type GTPase-activating protein RICH2) (RhoGAP interacting with CIP4 homologs protein 2) (RICH-2)	Arhgap44 Rich2	814	2	19.1752	0.102921	19.2906	0.101875	1.08322	0.0754515	>0.05
F1LQY6	F1LQY6_RAT	EF hand calcium binding protein 2 (Protein Necab2)	Necab2 Efcbp2 rCG_51128	352	6	22.9943	0.242459	23.2743	0.262078	1.21423	0.263258	>0.05
F1LR80	F1LR80_RAT	CaM kinase-like vesicle-associated protein	Camkv	504	15	27.3478	0.0471244	27.2892	0.0543878	0.960168	0.034004	>0.05
F1LRB8	F1LRB8_RAT	S-adenosylmethionine synthase (EC 2.5.1.6)	LOC100363915 rCG_56483	395	4	22.1143	0.0244958	22.1126	0.0361035	0.998823	0.025619	>0.05
F1LRI7	F1LRI7_RAT	AP2-associated protein kinase 1	Aak1	963	24	25.8393	0.0372265	25.8449	0.0482003	1.00393	0.035551	>0.05
F1LRJ2	F1LRJ2_RAT	Protein Srrm2	Srrm2	2707	4	21.4059	0.157266	21.3957	0.161674	0.992918	0.0914041	>0.05
F1LRK0	F1LRK0_RAT	Clathrin coat assembly protein AP180	Snap91	919	19	28.0171	0.0221002	28.0496	0.0268266	1.02275	0.0181701	>0.05
F1LRL9	F1LRL9_RAT	Microtubule-associated protein 1B	Map1b	2461	54	28.3265	0.015153	28.3151	0.0216949	0.992182	0.0151911	>0.05
F1LRV6	F1LRV6_RAT	GMP reductase (EC 1.7.1.7)	Gmpr	345	3	20.2989	0.0739212	20.4639	0.0879199	1.12113	0.0720244	>0.05
F1LRW9	F1LRW9_RAT	Phosphatidylinositol 4-kinase alpha	Pi4ka	2044	5	20.8286	0.0848056	20.9308	0.0794939	1.07345	0.0605401	>0.05
F1LRZ7	F1LRZ7_RAT	Neurofilament heavy polypeptide	Nefh	1064	16	27.8162	0.0579053	27.8113	0.0674598	0.996625	0.0483923	>0.05
F1LSE0	F1LSE0_RAT	Protein Dnah2 (Fragment)	Dnah2	4371	3	21.2721	0.0522187	21.2262	0.0724566	0.968661	0.0490405	>0.05
F1LSE6	F1LSE6_RAT	Liprin-alpha-3	Ppfia3	1192	10	23.5072	0.0493231	23.4982	0.0607352	0.99372	0.0439681	>0.05
F1LSL8	F1LSL8_RAT	Protein Sptbn4	Sptbn4	2561	5	21.5217	0.0434617	21.5378	0.0514085	1.01124	0.0364071	>0.05
F1LSM5	F1LSM5_RAT	Nck-associated protein 1 (Fragment)	Nckap1	1093	8	23.3573	0.0499659	23.4562	0.064787	1.07096	0.0503064	>0.05
F1LT49	F1LT49_RAT	Protein Lrrc47	Lrrc47	580	2	20.6638	0.0536257	20.688	0.0690967	1.01686	0.0517867	>0.05
F1LTD7	F1LTD7_RAT	Protein Dennd4c	Dennd4c	1603	3	20.8833	0.0514797	20.9783	0.0737654	1.06808	0.0562659	>0.05
F1LU71	F1LU71_RAT	AU RNA binding protein/enoyl-coenzyme A hydratase (Predicted), isoform CRA_a (Protein Auh)	Auh Auh_predicted rCG_44030	315	7	24.4098	0.0196009	24.445	0.0405694	1.02465	0.0285633	>0.05
F1LUA1	F1LUA1_RAT	Protein Eea1 (Fragment)	Eea1	1411	10	24.0863	0.073306	24.0079	0.11688	0.947067	0.074161	>0.05
F1LUD4	F1LUD4_RAT	Protein Fnip1	Fnip1 LOC100362347	1164	5	23.2046	0.115708	23.0842	0.0659205	0.919879	0.0410176	>0.05
F1LUT4	F1LUT4_RAT	Phospholipid-translocating ATPase (EC 3.6.3.1) (Fragment)	Atp8a1	1133	9	23.9272	0.0337407	23.8806	0.0459485	0.968176	0.0312236	>0.05
F1LV89	F1LV89_RAT	Protein Rap1gap (RAP1, GTPase activating protein 1, isoform CRA_a)	Rap1gap Rap1ga1 rCG_31337	727	10	24.7737	0.0415306	24.7996	0.0345508	1.01811	0.024367	>0.05
F1LVC3	F1LVC3_RAT	Protein Rab6b (RAB6B, member RAS oncogene family (Predicted))	Rab6b Rab6b_predicted rCG_25123	175	6	23.0235	0.0425817	22.9866	0.0352073	0.974739	0.0242342	>0.05
F1LVL5	F1LVL5_RAT	Protein Shroom4	Shroom4	1487	3	23.8213	0.0318795	23.7896	0.046451	0.978274	0.030961	>0.05
F1LVR4	F1LVR4_RAT	Protein Camk1d (Fragment)	Camk1d	383	4	21.455	0.0482023	21.4669	0.0582562	1.00823	0.0387053	>0.05
F1LW91	F1LW91_RAT	Protein Numa1 (Fragment)	Numa1	2078	3	26.2718	0.0442123	26.2773	0.0505861	1.00383	0.0346026	>0.05
F1LWD6	F1LWD6_RAT	Uncharacterized protein (Fragment)	0	298	2	23.734	0.0637589	23.8274	0.0883275	1.06686	0.0620733	>0.05
F1LX07	F1LX07_RAT	Protein Slc25a12 (Fragment)	Slc25a12 LOC100360985	675	26	27.8379	0.0214403	27.8282	0.0290371	0.993282	0.0200985	>0.05
F1LX22	F1LX22_RAT	Protein LOC100909950	Pip4k2a LOC100909950	403	2	19.9838	0.0418986	20.0363	0.0866758	1.03699	0.05597	>0.05
F1LXA0	F1LXA0_RAT	NADH dehydrogenase (Ubiquinone) 1 alpha subcomplex, 12 (Predicted), isoform CRA_b (Protein LOC100910710)	Ndufa12 LOC100910710 Ndufa12_predicted rCG_49121	145	6	25.5443	0.075207	25.4206	0.088315	0.917811	0.058379	>0.05
F1LXD9	F1LXD9_RAT	Protein Ccdc180 (Fragment)	Ccdc180 LOC100910460	1640	3	21.3956	0.135889	21.2904	0.117171	0.929694	0.0793933	>0.05
F1LXU4	F1LXU4_RAT	Protein Nbea (Fragment)	Nbea	1382	9	22.4484	0.0582974	22.4718	0.0623016	1.01637	0.0449934	>0.05
F1LY09	F1LY09_RAT	Protein Actr3b (Fragment)	Actr3b	315	4	23.4191	0.0325448	23.4041	0.0398106	0.989682	0.0269991	>0.05
F1LYA6	F1LYA6_RAT	Protein Abi2	Abi2	534	5	24.2982	0.0571504	24.3204	0.0586229	1.01547	0.0411919	>0.05
F1LYK3	F1LYK3_RAT	Protein LOC685707	Nav1 LOC685707	1875	4	20.9508	0.0450428	20.8727	0.0446197	0.947298	0.0294417	>0.05
F1LYS1	F1LYS1_RAT	Regulating synaptic membrane exocytosis protein 1	Rims1	1553	7	21.9237	0.0594106	21.9287	0.0774177	1.00347	0.0590752	>0.05
F1LZ64	F1LZ64_RAT	Protein Abhd12b	Abhd12b	212	2	20.9588	0.0916428	21.0117	0.141179	1.03731	0.110038	>0.05
F1M0Z1	F1M0Z1_RAT	Protein Trio	Trio	3104	5	22.2347	0.113715	22.2854	0.0924894	1.03576	0.066761	>0.05
F1M0Z3	F1M0Z3_RAT	Copine IV (Predicted), isoform CRA_a (Protein Cpne4)	Cpne4 Cpne4_predicted rCG_25293	567	4	21.2855	0.135892	21.1492	0.143206	0.909856	0.0984372	>0.05
F1M111	F1M111_RAT	Protein Myo5c	Myo5c	1742	4	22.6716	0.139539	22.7901	0.135832	1.08564	0.10093	>0.05
F1M2D3	F1M2D3_RAT	Uncharacterized protein	Vdac1	282	11	29.4646	0.0196291	29.4621	0.0306326	0.998255	0.0207123	>0.05
F1M386	RPGF2_RAT	Rap guanine nucleotide exchange factor 2 (Cyclic nucleotide ras GEF) (CNrasGEF) (Neural RAP guanine nucleotide exchange protein) (nRap GEP) (PDZ domain-containing guanine nucleotide exchange factor 1) (PDZ-GEF1) (RA-GEF-1) (Ras/Rap1-associating GEF-1)	Rapgef2 Pdzgef1	1496	10	22.2804	0.0279061	22.3165	0.0243322	1.02534	0.0174976	>0.05
F1M392	F1M392_RAT	Protein Limch1	Limch1	1085	2	16.6495	0.220229	16.6439	0.148746	0.996105	0.110589	>0.05
F1M3D3	F1M3D3_RAT	Heterogeneous nuclear ribonucleoprotein M	Hnrnpm	729	5	24.2168	0.0906084	24.1855	0.0699171	0.978551	0.0445368	>0.05
F1M3H8	F1M3H8_RAT	Protein Hnrnpa0	Hnrnpa0	303	2	20.592	0.0527327	20.6508	0.0580231	1.04161	0.0414907	>0.05
F1M3W5	F1M3W5_RAT	Protein Dmxl2 (Fragment)	Dmxl2	2244	19	24.5065	0.0288209	24.5539	0.0311713	1.03344	0.0227158	>0.05
F1M403	F1M403_RAT	Protein Ube2o (Fragment)	Ube2o	1287	4	22.9216	0.108097	22.931	0.0591668	1.00655	0.0399661	>0.05
F1M471	F1M471_RAT	Protein Epm2aip1	Epm2aip1	474	3	21.4311	0.0207723	21.5098	0.0389216	1.05607	0.0292843	>0.05
F1M4K6	F1M4K6_RAT	Leucine-rich repeat-containing protein 7 (Fragment)	Lrrc7	1494	6	22.427	0.0345569	22.4967	0.0289638	1.04949	0.0201208	>0.05
F1M4Q3	F1M4Q3_RAT	Protein Hmcn1	Hmcn1	5190	4	21.3273	0.0960327	21.2531	0.0823181	0.94984	0.05495	>0.05
F1M542	F1M542_RAT	Protein Adam22	Adam22	879	7	23.2342	0.0297643	23.2988	0.0309245	1.04579	0.0221722	>0.05
F1M5N4	F1M5N4_RAT	Malic enzyme	Me3	605	15	24.8653	0.039967	24.9217	0.0260152	1.03991	0.0185388	>0.05
F1M649	NLRC4_RAT	NLR family CARD domain-containing protein 4 (Ice protease-activating factor) (Ipaf)	Nlrc4 Ipaf	1023	3	24.7315	0.0483348	24.7386	0.0410659	1.00499	0.0284994	>0.05
F1M678	F1M678_RAT	Protein Ptprd (Fragment)	Ptprd	1871	4	22.1815	0.0548151	22.3062	0.0451692	1.09029	0.034056	>0.05
F1M6Q3	F1M6Q3_RAT	Protein Col4a2	Col4a2	1690	3	22.4142	0.0702177	22.4547	0.0559618	1.02842	0.0388935	>0.05
F1M6T6	F1M6T6_RAT	Protein Ppp6r2 (Fragment)	Ppp6r2	882	2	21.0158	0.0503	21.0635	0.0638399	1.03365	0.0460924	>0.05
F1M787	F1M787_RAT	Catenin delta-2 (Fragment)	Ctnnd2	866	6	22.9134	0.0716673	23.0899	0.152676	1.13018	0.15389	>0.05
F1M7N4	F1M7N4_RAT	Protein Clca5	Clca5	903	2	22.3725	0.038342	22.3832	0.0612943	1.00747	0.0448238	>0.05
F1M7W7	F1M7W7_RAT	NEDD8-activating enzyme E1 regulatory subunit	Nae1	534	2	20.0756	0.0387452	20.0844	0.0715497	1.00612	0.0540598	>0.05
F1M7Y3	F1M7Y3_RAT	Protein Rap1gds1 (RAP1, GTP-GDP dissociation stimulator 1 (Predicted), isoform CRA_b)	Rap1gds1 Rap1gds1_predicted rCG_28604	478	12	25.6328	0.0362331	25.6836	0.0229932	1.03587	0.0168809	>0.05
F1M820	F1M820_RAT	Sorbin and SH3 domain-containing protein 1 (Fragment)	Sorbs1	1290	3	21.5316	0.0590834	21.6987	0.0509998	1.12277	0.0406837	<0.05
F1M836	F1M836_RAT	MAP/microtubule affinity-regulating kinase 3	Mark3	797	7	23.6538	0.0412631	23.6607	0.0464361	1.00479	0.0303474	>0.05
F1M882	F1M882_RAT	Secretory carrier-associated membrane protein 5 (Fragment)	Scamp5	234	2	25.5387	0.0322987	25.5584	0.0366087	1.01376	0.0263933	>0.05
F1M8G9	F1M8G9_RAT	Protein Ncam2 (Fragment)	Ncam2	819	9	23.9535	0.0232635	23.9347	0.0201375	0.987119	0.0141813	>0.05
F1M8H6	F1M8H6_RAT	Phosphatidylinositol 4-phosphate 5-kinase type-1 gamma	Pip5k1c	688	6	23.7779	0.0546449	23.8138	0.0637442	1.02519	0.0449547	>0.05
F1M8K1	F1M8K1_RAT	Protein Pcdh1 (Fragment)	Pcdh1	1017	7	23.4882	0.0551159	23.4189	0.0465288	0.953102	0.0310103	>0.05
F1M949	F1M949_RAT	Protein Ckap5	Ckap5	2032	4	18.3762	0.0592011	18.4219	0.0808638	1.03221	0.0575317	>0.05
F1M978	F1M978_RAT	Inositol monophosphatase 1	Impa1	277	7	23.8865	0.0457968	23.9595	0.0481466	1.05192	0.0347924	>0.05
F1M9N9	F1M9N9_RAT	Protein Ank2 (Fragment)	Ank2	3903	66	28.3664	0.210634	28.4993	0.262447	1.09649	0.190825	>0.05
F1M9T2	F1M9T2_RAT	Protein Parp8 (Fragment)	Parp8	804	2	19.6986	0.054358	19.6384	0.0841585	0.959113	0.0564753	>0.05
F1M9V7	F1M9V7_RAT	Protein Npepps	Npepps	920	22	26.2193	0.0289644	26.2207	0.0214532	1.00097	0.0145353	>0.05
F1M9Y7	F1M9Y7_RAT	Protein Tcp11l1	Tcp11l1	509	3	20.2848	0.106656	20.3852	0.0580915	1.0721	0.0414634	>0.05
F1MA36	F1MA36_RAT	Spectrin beta 3 (Spectrin beta chain, non-erythrocytic 2)	Sptbn2 Spnb3 rCG_48072	2388	82	28.6996	0.0325136	28.7596	0.0191015	1.04243	0.013749	>0.05
F1MAF8	F1MAF8_RAT	Protein Atg2b	Atg2b	2075	3	21.9507	0.109006	22.0066	0.114873	1.03952	0.0887696	>0.05
F1MAK3	F1MAK3_RAT	Protein Arhgap32	Arhgap32	2086	4	21.2906	0.0493532	21.2224	0.072131	0.953814	0.0482456	>0.05
F1MAP9	F1MAP9_RAT	E3 ubiquitin-protein ligase HUWE1	Huwe1	4181	2	20.4051	0.39969	20.9803	0.274939	1.48991	0.237313	>0.05
F2Z3Q8	F2Z3Q8_RAT	Importin subunit beta-1	Kpnb1	876	11	24.3535	0.0367762	24.4067	0.0401466	1.03754	0.0282543	>0.05
F7EPE0	F7EPE0_RAT	Sulfated glycoprotein 1	Psap	557	3	20.0319	0.0928008	20.1402	0.121489	1.07795	0.0926321	>0.05
F7EYB9	F7EYB9_RAT	Protein Omg (RCG34300)	Omg rCG_34300	443	5	25.7748	0.0209803	25.7544	0.0453475	0.985979	0.0308091	>0.05
F7EZQ4	F7EZQ4_RAT	Protein Fcgbpl1	Fcgbpl1	2537	2	21.1421	0.0733432	21.2672	0.119488	1.09062	0.0888038	>0.05
F8WFM2	F8WFM2_RAT	Beta-soluble NSF attachment protein	Napb	298	14	27.7454	0.0337176	27.764	0.0336649	1.01294	0.0228433	>0.05
F8WG67	F8WG67_RAT	Acyl-CoA thioesterase 7, isoform CRA_a (Cytosolic acyl coenzyme A thioester hydrolase)	Acot7 rCG_30783	372	7	24.8078	0.072042	24.7846	0.0815355	0.984044	0.0571866	>0.05
G3V624	G3V624_RAT	Coronin	Coro1c RGD1564490_predicted rCG_21130	474	5	21.151	0.0441236	21.2044	0.0335659	1.03771	0.0243615	>0.05
G3V644	G3V644_RAT	NADH dehydrogenase (Ubiquinone) flavoprotein 3-like, isoform CRA_a (NADH dehydrogenase [ubiquinone] flavoprotein 3, mitochondrial)	Ndufv3 Ndufv3l rCG_60955	458	6	24.1645	0.0990036	24.2268	0.10241	1.04412	0.0715522	>0.05
G3V672	G3V672_RAT	Protein Nrip1 (RGD1563102 (Predicted))	Nrip1 RGD1563102_predicted rCG_58711	1162	2	21.029	0.067926	21.1541	0.059572	1.0906	0.0457377	>0.05
G3V6A8	G3V6A8_RAT	Golgi autoantigen, golgin subfamily b, macrogolgin 1, isoform CRA_c (Protein Golgb1)	Golgb1 rCG_52814	3187	3	18.7898	0.106566	18.7984	0.110137	1.00598	0.0821985	>0.05
G3V6D3	G3V6D3_RAT	ATP synthase subunit beta (EC 3.6.3.14)	Atp5b rCG_42467	529	39	32.221	0.00887728	32.2183	0.0150943	0.998117	0.0104369	>0.05
G3V6H9	G3V6H9_RAT	Nucleosome assembly protein 1-like 1 (RCG48740, isoform CRA_a)	Nap1l1 rCG_48740	391	3	22.9711	0.0285959	22.9826	0.0280657	1.00798	0.0195884	>0.05
G3V6L4	G3V6L4_RAT	Kinesin-like protein (Fragment)	Kif5c	914	11	23.2309	0.0416536	23.2815	0.043791	1.03574	0.0322272	>0.05
G3V6L8	G3V6L8_RAT	RCG61894, isoform CRA_a (Striatin)	Strn rCG_61894	780	11	24.7472	0.033336	24.7628	0.0208706	1.01087	0.0146369	>0.05
G3V6P2	G3V6P2_RAT	Dihydrolipoamide S-succinyltransferase (E2 component of 2-oxo-glutarate complex), isoform CRA_a (Dihydrolipoyllysine-residue succinyltransferase component of 2-oxoglutarate dehydrogenase complex, mitochondrial)	Dlst rCG_21026	454	5	25.7702	0.0217809	25.8231	0.0239318	1.03733	0.0172276	>0.05
G3V6P7	G3V6P7_RAT	Myosin, heavy polypeptide 9, non-muscle (Protein LOC100911597)	LOC100911597 Myh9 rCG_59912	1960	13	24.2628	0.0188171	24.2533	0.0288755	0.993418	0.0202618	>0.05
G3V6P8	G3V6P8_RAT	Guanine nucleotide-binding protein subunit gamma	Gng12 rCG_55333	72	3	23.2173	0.0450192	23.2092	0.0494397	0.994408	0.0325914	>0.05
G3V6Q3	G3V6Q3_RAT	Protein Wdr13	Wdr13	392	3	21.3572	0.080029	21.421	0.0747252	1.04524	0.0555632	>0.05
G3V6Q6	G3V6Q6_RAT	Guanine nucleotide binding protein, alpha 11 (Guanine nucleotide-binding protein subunit alpha-11)	Gna11 rCG_29464	359	6	23.604	0.0266404	23.6569	0.0293293	1.03736	0.02111	>0.05
G3V6S2	G3V6S2_RAT	Aconitate hydratase (Aconitase) (EC 4.2.1.3)	Aco1 rCG_55067	889	5	21.2319	0.0443921	21.232	0.0763093	1.00003	0.047111	>0.05
G3V6U3	G3V6U3_RAT	Asparagine-linked glycosylation 2 homolog (Yeast, alpha-1,3-mannosyltransferase), isoform CRA_a (Protein Alg2)	Alg2 rCG_60347	415	5	22.3207	0.0395396	22.4053	0.0470871	1.06039	0.0334108	>0.05
G3V6W6	G3V6W6_RAT	Protein Psmc6 (RCG61291)	Psmc6 LOC100365869 rCG_61291	403	3	20.8096	0.0562487	20.7478	0.0581351	0.958058	0.0392202	>0.05
G3V6Y6	G3V6Y6_RAT	Alpha-1,4 glucan phosphorylase (EC 2.4.1.1)	Pygb rCG_37246	843	28	27.1167	0.0353172	27.1452	0.0416655	1.01997	0.0295774	>0.05
G3V728	G3V728_RAT	4-nitrophenylphosphatase domain and non-neuronal SNAP25-like protein homolog 1 (C. elegans), isoform CRA_b (Protein Nipsnap1)	Nipsnap1 rCG_35740	284	4	25.7708	0.0348915	25.7392	0.0566272	0.978347	0.0387063	>0.05
G3V741	G3V741_RAT	Phosphate carrier protein, mitochondrial (Solute carrier family 25 (Mitochondrial carrier; adenine nucleotide translocator), member 3, isoform CRA_c)	Slc25a3 rCG_49152	356	12	28.1202	0.0240068	28.1504	0.0206805	1.02113	0.0148008	>0.05
G3V746	G3V746_RAT	Glutamate receptor ionotropic, NMDA 2B (Glutamate receptor, ionotropic, N-methyl D-aspartate 2B, isoform CRA_a)	Grin2b rCG_29810	1482	5	21.2662	0.0790821	21.3596	0.0549307	1.06687	0.0412059	>0.05
G3V786	G3V786_RAT	Protein Akr1b8 (RCG27994)	Akr1b8 rCG_27994	316	2	22.5912	0.0585654	22.6589	0.0453299	1.04797	0.0333083	>0.05
G3V7I8	G3V7I8_RAT	RCG57812, isoform CRA_b (STE20-like serine/threonine-protein kinase)	Slk rCG_57812	1203	5	26.4555	0.0747572	26.3481	0.0792984	0.928267	0.0505954	>0.05
G3V7J0	G3V7J0_RAT	Aldehyde dehydrogenase family 6, subfamily A1, isoform CRA_b (Methylmalonate-semialdehyde dehydrogenase [acylating], mitochondrial)	Aldh6a1 rCG_20746	535	7	23.1505	0.0178974	23.153	0.0226345	1.0017	0.0156909	>0.05
G3V7P1	STX12_RAT	Syntaxin-12 (Syntaxin-13)	Stx12 Stx13	274	6	22.8913	0.0307526	22.8998	0.0174882	1.00593	0.0122171	>0.05
G3V7T8	G3V7T8_RAT	Discs, large (Drosophila) homolog-associated protein 3, isoform CRA_b (Disks large-associated protein 3)	Dlgap3 rCG_31018	977	5	22.4313	0.0510073	22.4053	0.0825548	0.982172	0.0572853	>0.05
G3V7U2	G3V7U2_RAT	Microtubule-associated protein 1 A, isoform CRA_c (Microtubule-associated protein 1A)	Map1a Mtap1a rCG_27021	2776	78	29.747	0.0216274	29.7595	0.0310689	1.00873	0.021769	>0.05
G3V7U4	G3V7U4_RAT	Lamin-B1 (RCG46767, isoform CRA_c)	Lmnb1 rCG_46767	587	6	24.5747	0.0631637	24.601	0.0577512	1.01841	0.041645	>0.05
G3V7X5	G3V7X5_RAT	SPARC-like 1 (Mast9, hevin), isoform CRA_a (SPARC-like protein 1)	Sparcl1 rCG_37980	634	2	18.2584	0.117676	18.0734	0.162944	0.879627	0.0968934	>0.05
G3V7Y3	G3V7Y3_RAT	ATP synthase subunit delta, mitochondrial (ATP synthase, H+ transporting, mitochondrial F1 complex, delta subunit, isoform CRA_b)	Atp5d rCG_29527	168	3	27.9257	0.0252149	27.9643	0.0366902	1.02711	0.0259456	>0.05
G3V803	G3V803_RAT	Cadherin-2 (RCG49564, isoform CRA_a)	Cdh2 rCG_49564	906	3	22.041	0.0369463	22.0936	0.0587872	1.0372	0.0420105	>0.05
G3V826	G3V826_RAT	Transketolase (EC 2.2.1.1)	Tkt rCG_42377	655	14	26.2227	0.0181418	26.214	0.0309157	0.993975	0.0215301	>0.05
G3V864	G3V864_RAT	Lipid phosphate phosphatase-related protein type 4 (RCG28720)	Lppr4 rCG_28720	766	5	20.6832	0.0860788	20.6328	0.0640711	0.965617	0.04309	>0.05
G3V874	G3V874_RAT	Erythrocyte protein band 4.1-like 3, isoform CRA_b (Protein Epb41l3)	Epb41l3 Epb4.1l3 rCG_35644	963	28	26.5257	0.0114288	26.5343	0.018629	1.00595	0.0130287	>0.05
G3V881	G3V881_RAT	Leucine rich repeat neuronal 6A, isoform CRA_a (Protein Lingo1)	Lingo1 Lrrn6a rCG_57832	620	3	21.8581	0.0966416	21.6963	0.122993	0.893949	0.0783328	>0.05
G3V8A5	G3V8A5_RAT	Vacuolar protein sorting-associated protein 35	Vps35 Vps35_mapped rCG_44281	796	12	24.4811	0.0378204	24.4255	0.0352107	0.962196	0.0233087	>0.05
G3V8B6	G3V8B6_RAT	26S proteasome non-ATPase regulatory subunit 1 (Proteasome (Prosome, macropain) 26S subunit, non-ATPase, 1, isoform CRA_a)	Psmd1 rCG_23832	953	7	22.6223	0.114106	22.7298	0.101452	1.07741	0.0711738	>0.05
G3V8E8	G3V8E8_RAT	Guanine nucleotide-binding protein G(olf) subunit alpha	Gnal	381	11	24.6714	0.106237	24.5348	0.0591846	0.909622	0.0402393	>0.05
G3V8G4	G3V8G4_RAT	Brevican core protein (Brevican, isoform CRA_a)	Bcan LOC100910284 rCG_62833	883	11	26.7739	0.0403487	26.779	0.0324605	1.00356	0.023216	>0.05
G3V8H5	G3V8H5_RAT	Inhibitor of kappaB kinase beta, isoform CRA_b (Inhibitor of nuclear factor kappa-B kinase subunit beta)	Ikbkb rCG_43029	757	2	19.5238	0.0670613	19.5419	0.0754728	1.01259	0.0562056	>0.05
G3V8K2	G3V8K2_RAT	Guanine nucleotide-binding protein subunit gamma	Gng3 rCG_47413	75	3	24.8913	0.0264922	24.901	0.0446622	1.00675	0.0314119	>0.05
G3V8L3	G3V8L3_RAT	Lamin A, isoform CRA_b (Prelamin-A/C)	Lmna rCG_62695	665	7	22.4408	0.0406096	22.5324	0.0527786	1.06555	0.0394173	>0.05
G3V8Q2	G3V8Q2_RAT	Alpha-internexin (Internexin, alpha)	Ina Inexa rCG_57469	506	25	29.6867	0.00937071	29.7107	0.01502	1.01677	0.0107929	>0.05
G3V8R2	G3V8R2_RAT	Neurocan core protein (Protein LOC102550316) (RCG38677)	Ncan LOC100911345 LOC102550316 rCG_38677	1263	7	23.3571	0.0388294	23.4038	0.0352325	1.03287	0.0254313	>0.05
G3V8T4	G3V8T4_RAT	DNA damage-binding protein 1 (Damage-specific DNA binding protein 1)	Ddb1 rCG_47402	1140	5	21.345	0.039671	21.4697	0.0358599	1.09028	0.027513	<0.05
G3V8V3	G3V8V3_RAT	Alpha-1,4 glucan phosphorylase (EC 2.4.1.1)	Pygm rCG_48197	842	12	25.2576	0.0238463	25.285	0.0236436	1.01913	0.0165179	>0.05
G3V8W2	G3V8W2_RAT	Phosphatidate cytidylyltransferase (EC 2.7.7.41)	Cds2 rCG_26193	444	2	23.8095	0.0587848	23.73	0.0821078	0.946432	0.0562014	>0.05
G3V914	G3V914_RAT	Glutamate receptor 2	Gria2	883	9	23.554	0.0487906	23.6184	0.0428972	1.04564	0.0304827	>0.05
G3V918	G3V918_RAT	Phosphoribosylglycinamide formyltransferase, isoform CRA_a (Protein Gart)	Gart rCG_58778	1010	2	20.0687	0.0686669	20.057	0.100662	0.991912	0.0676983	>0.05
G3V928	G3V928_RAT	Protein Lrp1 (RCG59548)	Lrp1 rCG_59548	4545	3	20.7913	0.060931	20.7862	0.0915125	0.996471	0.0716522	>0.05
G3V936	G3V936_RAT	Citrate synthase	Cs rCG_42519	466	16	28.5953	0.0186111	28.5882	0.0259283	0.995039	0.0180263	>0.05
G3V940	G3V940_RAT	Coronin	Coro1b rCG_48535	484	4	23.6078	0.0306954	23.6494	0.0199572	1.02924	0.0145322	>0.05
G3V949	G3V949_RAT	CAP-Gly domain-containing linker protein 2 (Cytoplasmic linker 2)	Clip2 Cyln2 rCG_21414	1047	6	21.9692	0.049647	21.9809	0.0546233	1.00814	0.0388782	>0.05
G3V957	G3V957_RAT	Protein LOC100359960	LOC100359960	263	5	22.7896	0.0401782	22.6821	0.0820043	0.928204	0.0449749	>0.05
G3V963	G3V963_RAT	RCG47487, isoform CRA_b (Transmembrane protein 132A)	Tmem132a rCG_47487	1021	2	20.1276	0.241091	19.9814	0.182474	0.903614	0.12767	>0.05
G3V964	G3V964_RAT	Neurotrimin (RCG22798)	Ntm rCG_22798	344	7	25.5925	0.0631974	25.4525	0.0601136	0.907483	0.0382896	>0.05
G3V984	G3V984_RAT	Protein bassoon (RCG25274, isoform CRA_a)	Bsn rCG_25274	3933	52	27.0486	0.0227565	27.0273	0.0401098	0.985312	0.0285476	>0.05
G3V9G1	G3V9G1_RAT	Adenylate cyclase 5 (Adenylate cyclase type 5)	Adcy5 rCG_52683	1262	10	25.4639	0.0458373	25.514	0.0372003	1.03537	0.0267538	>0.05
G3V9K0	G3V9K0_RAT	Cysteinyl-tRNA synthetase (Predicted), isoform CRA_b (Protein Cars)	Cars Cars_predicted rCG_47503	748	3	20.5856	0.0553184	20.5321	0.0709326	0.963636	0.0494524	>0.05
G3V9N8	G3V9N8_RAT	AP complex subunit beta	Ap1b1 rCG_35796	942	24	27.564	0.0196934	27.5573	0.0205203	0.995357	0.0141949	>0.05
G3V9Q3	G3V9Q3_RAT	Heterogeneous nuclear ribonucleoprotein H (Heterogeneous nuclear ribonucleoprotein H1, isoform CRA_b)	Hnrnph1 Hnrph1 rCG_32746	449	7	25.5353	0.025608	25.5687	0.0259503	1.02341	0.0189803	>0.05
G3V9T7	G3V9T7_RAT	ATPase Asna1 (EC 3.6.-.-) (Arsenical pump-driving ATPase) (Arsenite-stimulated ATPase)	Asna1 rCG_51373	348	5	22.5895	0.0608025	22.6505	0.0482005	1.0432	0.0354904	>0.05
G3V9Y1	G3V9Y1_RAT	Myosin, heavy polypeptide 10, non-muscle, isoform CRA_b (Myosin-10)	Myh10 rCG_34638	1976	48	29.6499	0.0836299	29.6509	0.111696	1.00071	0.0737841	>0.05
G3V9Z6	G3V9Z6_RAT	Septin 8 (Predicted) (Septin-8)	Sept8 Sept8_predicted rCG_33165	429	11	25.1227	0.0392635	25.1434	0.0379776	1.01445	0.0271649	>0.05
H1UBM5	H1UBM5_RAT	Copine 6 protein	Cpne6	552	5	21.4733	0.129235	21.4288	0.131098	0.969602	0.0985665	>0.05
H9KVF8	H9KVF8_RAT	NADH-ubiquinone oxidoreductase chain 1 (EC 1.6.5.3) (Fragment)	ND1	318	2	21.6452	0.0391709	21.7344	0.0439699	1.06377	0.0319029	>0.05
I6L9G6	I6L9G6_RAT	Protein Tardbp (RCG31562, isoform CRA_c) (Tardbp protein)	Tardbp rCG_31562	285	3	21.0657	0.0699283	21.0452	0.0583644	0.985892	0.0380197	>0.05
I7EFB0	I7EFB0_RAT	Myelin basic protein transcript variant N (Fragment)	Mbp	209	18	33.0702	0.0221592	33.0421	0.0327525	0.980769	0.0228315	>0.05
M0R544	M0R544_RAT	Glucosidase, alpha, acid, isoform CRA_a (Lysosomal alpha-glucosidase)	Gaa rCG_33228	953	2	21.0144	0.0630529	20.9603	0.0436796	0.963159	0.0299073	>0.05
M0R5A9	M0R5A9_RAT	Protein Dennd5b (Fragment)	Dennd5b	918	5	25.5452	0.0650201	25.5343	0.0331524	0.992491	0.0237584	>0.05
M0R5C6	M0R5C6_RAT	Protein Iqsec1	Iqsec1 LOC686590	1099	4	21.8531	0.0639355	21.8502	0.0787442	0.998016	0.0589113	>0.05
M0R5N3	M0R5N3_RAT	Uncharacterized protein (Fragment)	0	250	5	25.2987	0.0672097	25.3339	0.0889114	1.0247	0.0576722	>0.05
M0R5N4	M0R5N4_RAT	Prefoldin subunit 4	Pfdn4 LOC100366237 rCG_32197	134	2	19.8414	0.303953	19.1719	0.521164	0.628738	0.195885	>0.05
M0R618	M0R618_RAT	Protein Etl4 (Fragment)	Etl4	1981	6	21.4	0.038632	21.4035	0.0346969	1.00245	0.0230204	>0.05
M0R660	M0R660_RAT	Glyceraldehyde-3-phosphate dehydrogenase (EC 1.2.1.12)	RGD1565368	333	22	32.1228	0.0181149	32.1201	0.0209722	0.998081	0.014607	>0.05
M0R6H3	M0R6H3_RAT	Protein LOC100912526	Rgag1 LOC100912526	1368	4	23.7341	0.0385598	23.6852	0.0496716	0.966646	0.0330405	>0.05
M0R776	M0R776_RAT	Protein Mrps36 (RCG44686, isoform CRA_a)	Mrps36 rCG_44686	103	4	22.2106	0.11826	21.977	0.149984	0.850556	0.0820619	>0.05
M0R781	M0R781_RAT	Protein Dpp9	Dpp9	862	2	19.4431	0.0963212	19.5524	0.0852221	1.07869	0.0595021	>0.05
M0R7F3	M0R7F3_RAT	Protein Wasf3	Wasf3	501	2	19.9369	0.0368225	19.9518	0.0418094	1.01039	0.0294034	>0.05
M0R7U1	M0R7U1_RAT	Protein Ak5 (RCG28422)	Ak5 rCG_28422	562	2	22.1022	0.178371	21.9103	0.137096	0.87541	0.0824704	>0.05
M0R7V3	M0R7V3_RAT	Protein Apoo	Apoo	198	3	24.2002	0.0639165	24.2351	0.0688493	1.02447	0.0535619	>0.05
M0R7W2	M0R7W2_RAT	Protein Arhgef10l	Arhgef10l	1202	3	19.7822	0.157841	19.9578	0.0884373	1.12947	0.0658023	>0.05
M0R809	M0R809_RAT	Guanine nucleotide-binding protein subunit gamma	Gng4 rCG_19927	75	2	22.6005	0.0706892	22.5876	0.0567696	0.991137	0.0391551	>0.05
M0R8T2	M0R8T2_RAT	10-formyltetrahydrofolate dehydrogenase (EC 1.5.1.6)	Aldh1l1	902	5	21.6208	0.0593936	21.6423	0.0398748	1.01502	0.0282506	>0.05
M0R8U1	M0R8U1_RAT	Protein Dnah5	Dnah5	3470	3	26.2813	0.130084	26.3185	0.167266	1.02611	0.112967	>0.05
M0R9D5	M0R9D5_RAT	Protein Ahnak	Ahnak	5363	2	21.3992	0.138432	21.3341	0.135418	0.95593	0.0931074	>0.05
M0R9I8	M0R9I8_RAT	40S ribosomal protein S12	LOC100364427	132	5	21.589	0.0405332	21.5488	0.0306565	0.972477	0.0208069	>0.05
M0R9L0	M0R9L0_RAT	Protein Naca	Naca	2163	4	24.7295	0.215321	25.017	0.211262	1.22051	0.197206	>0.05
M0RA24	M0RA24_RAT	Protein LOC100362391	LOC100362391	100	4	23.0687	0.0359059	23.0543	0.0296229	0.990054	0.0205622	>0.05
M0RAD5	M0RAD5_RAT	ATP-dependent Clp protease proteolytic subunit (EC 3.4.21.92)	Clpp	272	2	21.6837	0.0693703	21.7042	0.0615273	1.01428	0.048657	>0.05
M0RAJ5	M0RAJ5_RAT	Protein Prr14l	Prr14l	1967	3	21.1475	0.0539518	21.219	0.0478383	1.05081	0.0348648	>0.05
M0RAP5	M0RAP5_RAT	Protein Sbf1	Sbf1	1893	4	21.965	0.0551011	22.0431	0.0785492	1.05557	0.0605763	>0.05
M0RB63	M0RB63_RAT	Protein LOC684509 (RCG63041)	LOC684509 rCG_63041	84	2	23.8366	0.0279958	23.8067	0.0367527	0.979487	0.0254487	>0.05
M0RBH6	M0RBH6_RAT	Uncharacterized protein (Fragment)	0	320	4	29.2796	0.0661753	29.2011	0.0591411	0.947044	0.0399621	>0.05
M0RBJ0	M0RBJ0_RAT	Guanine nucleotide-binding protein subunit gamma (Fragment)	Gng2	58	2	26.8095	0.0588067	26.7716	0.026688	0.974096	0.0179089	>0.05
M0RBL5	M0RBL5_RAT	Uncharacterized protein (Fragment)	0	528	5	26.2089	0.0642413	26.242	0.0558898	1.02324	0.0413815	>0.05
M0RBL8	M0RBL8_RAT	Protein Tceal6	Tceal6 LOC679974 Tceal3	199	3	25.5967	0.152438	25.2812	0.208011	0.803543	0.107611	>0.05
M0RC57	M0RC57_RAT	Protein unc-45 homolog A	Smap1 LOC684800	440	3	22.792	0.0357858	22.7983	0.0370419	1.00435	0.0276458	>0.05
M0RC58	M0RC58_RAT	Protein Dpy19l2	Dpy19l2 Dyp19l2	773	2	20.4249	0.0811968	20.4583	0.0568294	1.02338	0.038901	>0.05
M0RC65	M0RC65_RAT	Cofilin 2, muscle (Predicted), isoform CRA_b (Protein Cfl2)	Cfl2 Cfl2_predicted rCG_62072	166	6	27.9975	0.0197121	27.999	0.0247912	1.00105	0.0173059	>0.05
M0RD40	M0RD40_RAT	Protein Sik3	Sik3 LOC684112	1366	2	20.4624	0.0770681	20.4948	0.0937963	1.02271	0.0681781	>0.05
M0RDI5	M0RDI5_RAT	Protein Mcu (Similar to CG18769-PB, isoform B, isoform CRA_b)	Mcu LOC294560 rCG_22037	350	3	24.1132	0.0670196	23.998	0.0567232	0.923241	0.0351921	>0.05
M9MMM9	M9MMM9_RAT	Microtubule-actin cross-linking factor 1	Macf1	5430	12	22.4628	0.0769671	22.4949	0.0336187	1.02252	0.0237871	>0.05
O08557	DDAH1_RAT	N(G),N(G)-dimethylarginine dimethylaminohydrolase 1 (DDAH-1) (Dimethylarginine dimethylaminohydrolase 1) (EC 3.5.3.18) (DDAHI) (Dimethylargininase-1)	Ddah1 Ddah	285	11	24.9621	0.0226456	24.9672	0.0160334	1.0035	0.0110894	>0.05
O08618	KPRB_RAT	Phosphoribosyl pyrophosphate synthase-associated protein 2 (PRPP synthase-associated protein 2) (41 kDa phosphoribosypyrophosphate synthetase-associated protein) (PAP41)	Prpsap2	369	5	21.9496	0.0509823	22.0217	0.0397547	1.05127	0.0288956	>0.05
O08629	TIF1B_RAT	Transcription intermediary factor 1-beta (TIF1-beta) (E3 SUMO-protein ligase TRIM28) (EC 6.3.2.-) (KRAB-associated protein 1) (Nuclear corepressor KAP-1) (Tripartite motif-containing protein 28)	Trim28 Kap1 Tif1b	835	3	20.7172	0.0475058	20.7099	0.0598684	0.994965	0.0408294	>0.05
O08651	SERA_RAT	D-3-phosphoglycerate dehydrogenase (3-PGDH) (EC 1.1.1.95)	Phgdh	533	11	25.7281	0.0261487	25.7415	0.0274745	1.00939	0.019619	>0.05
O08679	MARK2_RAT	Serine/threonine-protein kinase MARK2 (EC 2.7.11.1) (EC 2.7.11.26) (ELKL motif kinase 1) (EMK-1) (MAP/microtubule affinity-regulating kinase 2)	Mark2	722	7	23.7942	0.0459061	23.8471	0.0348546	1.03738	0.025729	>0.05
O08838	AMPH_RAT	Amphiphysin	Amph Amph1	683	20	26.7024	0.02202	26.6921	0.0259383	0.99286	0.0176575	>0.05
O08839	BIN1_RAT	Myc box-dependent-interacting protein 1 (Amphiphysin II) (Amphiphysin-like protein) (Bridging integrator 1)	Bin1 Amph2 Amphl	588	19	26.2765	0.0358537	26.2528	0.0473066	0.983703	0.0309435	>0.05
O08875	DCLK1_RAT	Serine/threonine-protein kinase DCLK1 (EC 2.7.11.1) (Calcium/calmodulin-dependent protein kinase type I-like CPG16) (Doublecortin-like and CAM kinase-like 1) (Doublecortin-like kinase 1)	Dclk1 Cpg16 Dcamkl1	433	6	23.3126	0.0368993	23.4019	0.056663	1.06379	0.0445301	>0.05
O35049	NSMA2_RAT	Sphingomyelin phosphodiesterase 3 (EC 3.1.4.12) (Confluent 3Y1 cell-associated protein 1) (Neutral sphingomyelinase 2) (nSMase-2) (nSMase2) (Neutral sphingomyelinase II)	Smpd3 Cca1	655	3	21.5097	0.0957381	21.3828	0.0907014	0.915782	0.0618102	>0.05
O35077	GPDA_RAT	Glycerol-3-phosphate dehydrogenase [NAD(+)], cytoplasmic (GPD-C) (GPDH-C) (EC 1.1.1.8)	Gpd1	349	5	23.8711	0.0492551	23.8144	0.0735111	0.961409	0.0467473	>0.05
O35095	NCDN_RAT	Neurochondrin (Neurite outgrowth-related protein from the rat brain) (Norbin)	Ncdn	729	19	26.9645	0.0318399	26.9422	0.0337927	0.984627	0.0237443	>0.05
O35112	CD166_RAT	CD166 antigen (Activated leukocyte cell adhesion molecule) (HB2) (KG-CAM) (Protein MEMD) (SB-10 antigen) (CD antigen CD166)	Alcam	583	9	23.1704	0.0323915	23.1345	0.0382375	0.975455	0.0262052	>0.05
O35142	COPB2_RAT	Coatomer subunit beta' (Beta'-coat protein) (Beta'-COP) (p102)	Copb2	905	2	20.2468	0.0573992	20.3167	0.0546202	1.04963	0.0429831	>0.05
O35179	SH3G2_RAT	Endophilin-A1 (Endophilin-1) (SH3 domain protein 2A) (SH3 domain-containing GRB2-like protein 2) (SH3p4)	Sh3gl2 Sh3d2a Sh3p4	352	15	27.6915	0.0226595	27.7258	0.0250554	1.02411	0.0184843	>0.05
O35180	SH3G3_RAT	Endophilin-A3 (Endophilin-3) (SH3 domain protein 2C) (SH3 domain-containing GRB2-like protein 3) (SH3p13)	Sh3gl3 Sh3d2c1 Sh3p13	347	4	21.2467	0.0762159	21.371	0.0465158	1.09	0.034625	>0.05
O35244	PRDX6_RAT	Peroxiredoxin-6 (EC 1.11.1.15) (1-Cys peroxiredoxin) (1-Cys PRX) (Acidic calcium-independent phospholipase A2) (aiPLA2) (EC 3.1.1.-) (Antioxidant protein 2) (Non-selenium glutathione peroxidase) (NSGPx) (EC 1.11.1.9) (Thiol-specific antioxidant protein)	Prdx6 Aipla2 Aop2 Tsa	224	14	26.4619	0.0275793	26.4816	0.0265298	1.01379	0.0187101	>0.05
O35264	PA1B2_RAT	Platelet-activating factor acetylhydrolase IB subunit beta (EC 3.1.1.47) (PAF acetylhydrolase 30 kDa subunit) (PAF-AH 30 kDa subunit) (PAF-AH subunit beta) (PAFAH subunit beta) (Platelet-activating factor acetylhydrolase alpha 2 subunit) (PAF-AH alpha 2)	Pafah1b2 Pafahb	229	4	22.6963	0.0759474	22.6032	0.0835797	0.937522	0.0558031	>0.05
O35274	NEB2_RAT	Neurabin-2 (Neurabin-II) (Neural tissue-specific F-actin-binding protein II) (PP1bp134) (Protein phosphatase 1 regulatory subunit 9B) (Spinophilin) (p130)	Ppp1r9b	817	11	23.6267	0.0409316	23.6691	0.0350982	1.02979	0.0246277	>0.05
O35303	DNM1L_RAT	Dynamin-1-like protein (EC 3.6.5.5) (Dynamin-like protein)	Dnm1l Dlp1	755	26	26.5917	0.0245943	26.574	0.0246341	0.987768	0.0166176	>0.05
O35314	SCG1_RAT	Secretogranin-1 (Chromogranin-B) (CgB) (Glucagonoma peptide) (Secretogranin-I) (SgI) [Cleaved into: CCB peptide short form; CCB peptide long form]	Chgb	675	3	21.517	0.0788965	21.5291	0.0638128	1.00843	0.0439905	>0.05
O35458	VIAAT_RAT	Vesicular inhibitory amino acid transporter (GABA and glycine transporter) (Solute carrier family 32 member 1) (Vesicular GABA transporter) (rGVAT)	Slc32a1 Vgat Viaat	525	4	22.1623	0.0447425	22.1198	0.0305029	0.970983	0.0204837	>0.05
O35509	RB11B_RAT	Ras-related protein Rab-11B	Rab11b	218	9	24.9123	0.03939	24.9017	0.0448565	0.992685	0.0322386	>0.05
O35550	RABE1_RAT	Rab GTPase-binding effector protein 1 (Rabaptin-5) (Rabaptin-5alpha)	Rabep1 Rabpt5 Rabpt5a	862	2	19.9064	0.122148	20.0453	0.0930868	1.10101	0.074814	>0.05
O35567	PUR9_RAT	Bifunctional purine biosynthesis protein PURH [Includes: Phosphoribosylaminoimidazolecarboxamide formyltransferase (EC 2.1.2.3) (5-aminoimidazole-4-carboxamide ribonucleotide formyltransferase) (AICAR transformylase); IMP cyclohydrolase (EC 3.5.4.10) (ATIC) (IMP synthase) (Inosinicase)]	Atic Purh	592	11	23.1404	0.0171914	23.1203	0.0205687	0.986203	0.0141072	>0.05
O35764	NPTXR_RAT	Neuronal pentraxin receptor	Nptxr Npr	494	2	21.2127	0.0360054	21.2035	0.0331689	0.993647	0.0231352	>0.05
O35796	C1QBP_RAT	Complement component 1 Q subcomponent-binding protein, mitochondrial (GC1q-R protein) (Glycoprotein gC1qBP) (C1qBP)	C1qbp Gc1qbp	279	4	26.7474	0.0130161	26.7328	0.019926	0.989921	0.0137419	>0.05
O35814	STIP1_RAT	Stress-induced-phosphoprotein 1 (STI1) (Hsc70/Hsp90-organizing protein) (Hop)	Stip1 Hop	543	15	25.9462	0.0111874	25.968	0.0284725	1.01521	0.0199777	>0.05
O35828	CORO7_RAT	Coronin-7 (Crn7) (70 kDa WD repeat tumor rejection antigen)	Coro7	922	2	21.1546	0.0335801	21.1305	0.0389745	0.983421	0.0268337	>0.05
O35867	NEB1_RAT	Neurabin-1 (Neurabin-I) (Neural tissue-specific F-actin-binding protein I) (PP1bp175) (Protein phosphatase 1 regulatory subunit 9A) (p180)	Ppp1r9a	1095	16	25.6207	0.0473379	25.6749	0.0899738	1.03825	0.0683668	>0.05
O35964	SH3G1_RAT	Endophilin-A2 (Endophilin-2) (SH3 domain protein 2B) (SH3 domain-containing GRB2-like protein 1) (SH3p8)	Sh3gl1 Sh3p8	368	10	26.7484	0.0254636	26.7367	0.0166013	0.991928	0.0114484	>0.05
O35987	NSF1C_RAT	NSFL1 cofactor p47 (XY body-associated protein XY40) (p97 cofactor p47)	Nsfl1c	370	9	25.2492	0.0106581	25.2611	0.0178275	1.00827	0.012619	>0.05
O54975	XPP1_RAT	Xaa-Pro aminopeptidase 1 (EC 3.4.11.9) (Aminoacylproline aminopeptidase) (Cytosolic aminopeptidase P) (Soluble aminopeptidase P) (sAmp) (X-Pro aminopeptidase 1) (X-prolyl aminopeptidase 1, soluble) [Cleaved into: Xaa-Pro aminopeptidase 1, N-terminally processed]	Xpnpep1 App	623	6	22.7617	0.053085	22.8553	0.0335654	1.06702	0.0250017	>0.05
O55096	DPP3_RAT	Dipeptidyl peptidase 3 (EC 3.4.14.4) (Dipeptidyl aminopeptidase III) (Dipeptidyl arylamidase III) (Dipeptidyl peptidase III) (DPP III) (Enkephalinase B)	Dpp3	738	7	24.1774	0.114169	24.1942	0.134056	1.01177	0.0943467	>0.05
O55173	PDPK1_RAT	3-phosphoinositide-dependent protein kinase 1 (EC 2.7.11.1) (Protein kinase B kinase) (PkB kinase)	Pdpk1 Pdk1	559	2	21.0627	0.0430303	21.1389	0.0277579	1.05426	0.0197299	>0.05
O70196	PPCE_RAT	Prolyl endopeptidase (PE) (EC 3.4.21.26) (Post-proline cleaving enzyme) (rPop)	Prep	710	3	21.2024	0.0613532	21.2504	0.0655964	1.03383	0.0543413	>0.05
O70257	STX7_RAT	Syntaxin-7	Stx7	261	2	21.881	0.0418409	21.9424	0.0523366	1.04352	0.0381291	>0.05
O70351	HCD2_RAT	3-hydroxyacyl-CoA dehydrogenase type-2 (EC 1.1.1.35) (17-beta-hydroxysteroid dehydrogenase 10) (17-beta-HSD 10) (EC 1.1.1.51) (3-hydroxy-2-methylbutyryl-CoA dehydrogenase) (EC 1.1.1.178) (3-hydroxyacyl-CoA dehydrogenase type II) (Endoplasmic reticulum-associated amyloid beta-peptide-binding protein) (Mitochondrial ribonuclease P protein 2) (Mitochondrial RNase P protein 2) (Type II HADH)	Hsd17b10 Erab Hadh2	261	9	24.4584	0.030526	24.4935	0.0332745	1.02467	0.0232588	>0.05
O70419	O70419_RAT	Cortactin isoform C	0	471	7	23.5011	0.0303047	23.5023	0.0394712	1.0008	0.0282245	>0.05
O70441	SYN3_RAT	Synapsin-3 (Synapsin III)	Syn3	579	6	22.9281	0.0666134	22.8878	0.0656388	0.972449	0.0425262	>0.05
O70511	ANK3_RAT	Ankyrin-3 (ANK-3) (Ankyrin-G)	Ank3	2622	21	24.42	0.0356413	24.4313	0.025274	1.00787	0.0174923	>0.05
O70593	SGTA_RAT	Small glutamine-rich tetratricopeptide repeat-containing protein alpha (Alpha-SGT) (Small glutamine-rich protein with tetratricopeptide repeats 1)	Sgta Sgt Sgt1 Stg	314	3	21.9799	0.0561503	21.9553	0.050225	0.983078	0.0325462	>0.05
O88339	EPN1_RAT	Epsin-1 (EPS-15-interacting protein 1)	Epn1	575	6	23.5616	0.0394943	23.6118	0.0490313	1.03541	0.0373678	>0.05
O88377	PI42B_RAT	Phosphatidylinositol 5-phosphate 4-kinase type-2 beta (EC 2.7.1.149) (1-phosphatidylinositol 5-phosphate 4-kinase 2-beta) (Diphosphoinositide kinase 2-beta) (Phosphatidylinositol 5-phosphate 4-kinase type II beta) (PI(5)P 4-kinase type II beta) (PIP4KII-beta) (Phosphatidylinositol-phosphate kinase IIgamma) (PIPKIIgamma) (PtdIns(5)P-4-kinase isoform 2-beta)	Pip4k2b Pip5k2b	416	3	22.1275	0.121198	22.0131	0.121907	0.923778	0.0804428	>0.05
O88483	PDP1_RAT	[Pyruvate dehydrogenase [acetyl-transferring]]-phosphatase 1, mitochondrial (PDP 1) (EC 3.1.3.43) (Protein phosphatase 2C) (Pyruvate dehydrogenase phosphatase catalytic subunit 1) (PDPC 1)	Pdp1 Ppm2c	538	3	20.93	0.0779685	20.9251	0.080978	0.996604	0.0604065	>0.05
O88588	PACS1_RAT	Phosphofurin acidic cluster sorting protein 1 (PACS-1)	Pacs1	961	7	23.3018	0.0202475	23.3194	0.0187573	1.01228	0.0131236	>0.05
O88600	HSP74_RAT	Heat shock 70 kDa protein 4 (Ischemia responsive 94 kDa protein)	Hspa4 Irp94	840	26	26.9396	0.0243809	26.9529	0.0191274	1.00927	0.0133492	>0.05
O88637	PCY2_RAT	Ethanolamine-phosphate cytidylyltransferase (EC 2.7.7.14) (CTP:phosphoethanolamine cytidylyltransferase) (Phosphorylethanolamine transferase)	Pcyt2	404	2	19.2272	0.120771	19.3288	0.0803392	1.07294	0.0603671	>0.05
O88767	PARK7_RAT	Protein deglycase DJ-1 (EC 3.1.2.-) (EC 3.5.1.-) (Contraception-associated protein 1) (Protein CAP1) (Fertility protein SP22) (Parkinson disease protein 7 homolog)	Park7 Cap1	189	12	27.0341	0.0499204	27.0405	0.051466	1.00447	0.0349118	>0.05
O88831	KKCC2_RAT	Calcium/calmodulin-dependent protein kinase kinase 2 (CaM-KK 2) (CaM-kinase kinase 2) (CaMKK 2) (EC 2.7.11.17) (Calcium/calmodulin-dependent protein kinase kinase beta) (CaM-KK beta) (CaM-kinase kinase beta) (CaMKK beta)	Camkk2	587	3	21.2003	0.0460945	21.3234	0.0630137	1.08908	0.0479279	>0.05
O88989	MDHC_RAT	Malate dehydrogenase, cytoplasmic (EC 1.1.1.37) (Cytosolic malate dehydrogenase)	Mdh1 Mdh	334	13	30.411	0.0260863	30.4328	0.036335	1.01527	0.0259319	>0.05
O89049	TRXR1_RAT	Thioredoxin reductase 1, cytoplasmic (TR) (EC 1.8.1.9) (NADPH-dependent thioredoxin reductase) (Thioredoxin reductase TR1)	Txnrd1 Trxr1	499	2	20.118	0.0898773	20.229	0.0733169	1.07994	0.0536847	>0.05
P00507	AATM_RAT	Aspartate aminotransferase, mitochondrial (mAspAT) (EC 2.6.1.1) (EC 2.6.1.7) (Fatty acid-binding protein) (FABP-1) (Glutamate oxaloacetate transaminase 2) (Kynurenine aminotransferase 4) (Kynurenine aminotransferase IV) (Kynurenine--oxoglutarate transaminase 4) (Kynurenine--oxoglutarate transaminase IV) (Plasma membrane-associated fatty acid-binding protein) (FABPpm) (Transaminase A)	Got2 Maat	430	23	29.6093	0.0254685	29.6596	0.0179631	1.03547	0.0127244	>0.05
P00787	CATB_RAT	Cathepsin B (EC 3.4.22.1) (Cathepsin B1) (RSG-2) [Cleaved into: Cathepsin B light chain; Cathepsin B heavy chain]	Ctsb	339	5	22.8499	0.0206061	22.9419	0.0218252	1.06582	0.0164948	<0.01
P01041	CYTB_RAT	Cystatin-B (Cystatin-beta) (Liver thiol proteinase inhibitor) (Stefin-B)	Cstb Cst6	98	2	23.57	0.0476805	23.6004	0.044856	1.02128	0.0316767	>0.05
P01830	THY1_RAT	Thy-1 membrane glycoprotein (Thy-1 antigen) (CD antigen CD90)	Thy1 Thy-1	161	5	28.013	0.0213106	27.9833	0.0349711	0.979658	0.0237241	>0.05
P01946	HBA_RAT	Hemoglobin subunit alpha-1/2 (Alpha-1/2-globin) (Hemoglobin alpha-1/2 chain)	Hba1 Hba-a1	142	11	32.1465	0.0171216	32.1376	0.0172012	0.993853	0.0118459	>0.05
P02091	HBB1_RAT	Hemoglobin subunit beta-1 (Beta-1-globin) (Hemoglobin beta chain, major-form) (Hemoglobin beta-1 chain)	Hbb	147	16	31.8261	0.0228485	31.8044	0.0197294	0.985086	0.0134949	>0.05
P02262	H2A1_RAT	Histone H2A type 1	0	130	3	29.0353	0.0175201	29.0359	0.0351153	1.00041	0.0239966	>0.05
P02401	RLA2_RAT	60S acidic ribosomal protein P2	Rplp2 Rp2	115	4	25.3555	0.029079	25.3403	0.0329051	0.989548	0.0223027	>0.05
P02625	PRVA_RAT	Parvalbumin alpha	Pvalb Pva	110	3	21.8944	0.0586932	21.8709	0.0579072	0.983889	0.0397365	>0.05
P02650	APOE_RAT	Apolipoprotein E (Apo-E)	Apoe	312	7	25.9611	0.0398824	25.8975	0.0380121	0.9569	0.0252934	>0.05
P02770	ALBU_RAT	Serum albumin	Alb	608	24	28.7044	0.0333552	28.7647	0.0275134	1.04264	0.0196092	>0.05
P03994	HPLN1_RAT	Hyaluronan and proteoglycan link protein 1 (Cartilage-linking protein 1) (Cartilage-link protein) (Proteoglycan link protein)	Hapln1 Crtl1	354	5	26.6905	0.23946	26.4027	0.315882	0.819129	0.170781	>0.05
P04094	PENK_RAT	Proenkephalin-A [Cleaved into: Synenkephalin; Met-enkephalin (Opioid growth factor) (OGF); PENK(114-133); PENK(143-185); Met-enkephalin-Arg-Gly-Leu; Leu-enkephalin; PENK(239-260); Met-enkephalin-Arg-Phe]	Penk Penk-rs Penk1	269	4	24.6862	0.0569111	24.6951	0.0826536	1.00619	0.0582404	>0.05
P04177	TY3H_RAT	Tyrosine 3-monooxygenase (EC 1.14.16.2) (Tyrosine 3-hydroxylase) (TH)	Th	498	12	25.5933	0.0131558	25.6099	0.0255232	1.01157	0.0175785	>0.05
P04182	OAT_RAT	Ornithine aminotransferase, mitochondrial (EC 2.6.1.13) (Ornithine--oxo-acid aminotransferase)	Oat	439	7	22.9313	0.0385419	22.9123	0.0563783	0.986947	0.0372014	>0.05
P04218	OX2G_RAT	OX-2 membrane glycoprotein (MRC OX-2 antigen) (CD antigen CD200)	Cd200 Mox2	278	6	24.0187	0.0326282	23.9737	0.0308628	0.969268	0.0202844	>0.05
P04631	S100B_RAT	Protein S100-B (S-100 protein beta chain) (S-100 protein subunit beta) (S100 calcium-binding protein B)	S100b	92	4	28.2963	0.0233011	28.2824	0.0343259	0.990404	0.0235488	>0.05
P04636	MDHM_RAT	Malate dehydrogenase, mitochondrial (EC 1.1.1.37)	Mdh2 Mor1	338	20	30.9891	0.014671	30.9906	0.0124606	1.00106	0.00850966	>0.05
P04642	LDHA_RAT	L-lactate dehydrogenase A chain (LDH-A) (EC 1.1.1.27) (LDH muscle subunit) (LDH-M)	Ldha Ldh-1 Ldh1	332	20	29.7493	0.0168154	29.7658	0.0244353	1.01152	0.0169927	>0.05
P04692	TPM1_RAT	Tropomyosin alpha-1 chain (Alpha-tropomyosin) (Tropomyosin-1)	Tpm1 Alpha-tm Tpma	284	13	27.0583	0.0372992	27.087	0.0497859	1.02009	0.0348925	>0.05
P04762	CATA_RAT	Catalase (EC 1.11.1.6)	Cat Cas1	527	4	22.1694	0.307288	22.5594	0.275599	1.31032	0.240658	>0.05
P04764	ENOA_RAT	Alpha-enolase (EC 4.2.1.11) (2-phospho-D-glycerate hydro-lyase) (Enolase 1) (Non-neural enolase) (NNE)	Eno1 Eno-1	434	25	31.2768	0.0227402	31.2511	0.0279473	0.982386	0.0190555	>0.05
P04775	SCN2A_RAT	Sodium channel protein type 2 subunit alpha (Sodium channel protein brain II subunit alpha) (Sodium channel protein type II subunit alpha) (Voltage-gated sodium channel subunit alpha Nav1.2)	Scn2a Scn2a1	2005	3	25.6891	0.213489	25.9189	0.166089	1.17268	0.1137	>0.05
P04785	PDIA1_RAT	Protein disulfide-isomerase (PDI) (EC 5.3.4.1) (Cellular thyroid hormone-binding protein) (Prolyl 4-hydroxylase subunit beta)	P4hb Pdia1	509	5	22.8202	0.024382	22.8088	0.0305395	0.992118	0.0216259	>0.05
P04797	G3P_RAT	Glyceraldehyde-3-phosphate dehydrogenase (GAPDH) (EC 1.2.1.12) (38 kDa BFA-dependent ADP-ribosylation substrate) (BARS-38) (Peptidyl-cysteine S-nitrosylase GAPDH) (EC 2.6.99.-)	Gapdh Gapd	333	24	32.2547	0.0177626	32.2526	0.0205804	0.998488	0.014323	>0.05
P04897	GNAI2_RAT	Guanine nucleotide-binding protein G(i) subunit alpha-2 (Adenylate cyclase-inhibiting G alpha protein)	Gnai2 Gnai-2	355	15	26.9913	0.0146584	27.0159	0.0232565	1.01717	0.0163965	>0.05
P04904	GSTA3_RAT	Glutathione S-transferase alpha-3 (EC 2.5.1.18) (GST 2-2) (GST A3-3) (GST AA) (Glutathione S-transferase Yc-1) (GST Yc1)	Gsta3 Gstyc1	221	3	22.1056	0.0316679	22.1505	0.0300862	1.03164	0.0211708	>0.05
P04905	GSTM1_RAT	Glutathione S-transferase Mu 1 (EC 2.5.1.18) (GST 3-3) (GSTM1-1) (Glutathione S-transferase Yb-1) (GST Yb1)	Gstm1	218	10	26.8522	0.0252861	26.8275	0.0284998	0.983006	0.0190109	>0.05
P04906	GSTP1_RAT	Glutathione S-transferase P (EC 2.5.1.18) (Chain 7) (GST 7-7) (GST class-pi)	Gstp1	210	8	27.2188	0.0341377	27.2116	0.0351896	0.995034	0.0239213	>0.05
P05065	ALDOA_RAT	Fructose-bisphosphate aldolase A (EC 4.1.2.13) (Muscle-type aldolase)	Aldoa	364	22	31.19	0.0137959	31.1906	0.0129869	1.00042	0.00903992	>0.05
P05197	EF2_RAT	Elongation factor 2 (EF-2)	Eef2	858	21	25.8395	0.0248634	25.8591	0.0132426	1.01364	0.00941627	>0.05
P05370	G6PD_RAT	Glucose-6-phosphate 1-dehydrogenase (G6PD) (EC 1.1.1.49)	G6pdx G6pd	515	4	20.6652	0.08721	20.7689	0.0989744	1.07457	0.0764642	>0.05
P05371	CLUS_RAT	Clusterin (Dimeric acid glycoprotein) (DAG) (Sulfated glycoprotein 2) (SGP-2) (Testosterone repressed prostate message 2) (TRPM-2) [Cleaved into: Clusterin beta chain; Clusterin alpha chain]	Clu	447	5	21.2663	0.0521034	21.2752	0.0375406	1.0062	0.0262561	>0.05
P05708	HXK1_RAT	Hexokinase-1 (EC 2.7.1.1) (Brain form hexokinase) (Hexokinase type I) (HK I)	Hk1	918	34	29.0774	0.0257496	29.1193	0.0290421	1.02945	0.021051	>0.05
P05712	RAB2A_RAT	Ras-related protein Rab-2A	Rab2a Rab2	212	6	26.0574	0.0649484	26.1336	0.0795521	1.05424	0.0629919	>0.05
P06685	AT1A1_RAT	Sodium/potassium-transporting ATPase subunit alpha-1 (Na(+)/K(+) ATPase alpha-1 subunit) (EC 3.6.3.9) (Sodium pump subunit alpha-1)	Atp1a1	1023	35	31.6158	0.0124752	31.6365	0.0131647	1.01444	0.00919087	>0.05
P06686	AT1A2_RAT	Sodium/potassium-transporting ATPase subunit alpha-2 (Na(+)/K(+) ATPase alpha-2 subunit) (EC 3.6.3.9) (Na(+)/K(+) ATPase alpha(+) subunit) (Sodium pump subunit alpha-2)	Atp1a2	1020	44	31.6991	0.0103694	31.7119	0.0123794	1.00887	0.00868788	>0.05
P06687	AT1A3_RAT	Sodium/potassium-transporting ATPase subunit alpha-3 (Na(+)/K(+) ATPase alpha-3 subunit) (EC 3.6.3.9) (Na(+)/K(+) ATPase alpha(III) subunit) (Sodium pump subunit alpha-3)	Atp1a3	1013	46	32.276	0.00860138	32.2963	0.0129368	1.01411	0.00907172	>0.05
P06761	GRP78_RAT	78 kDa glucose-regulated protein (GRP-78) (Heat shock 70 kDa protein 5) (Immunoglobulin heavy chain-binding protein) (BiP) (Steroidogenesis-activator polypeptide)	Hspa5 Grp78	654	22	29.4439	0.0231215	29.4611	0.018912	1.012	0.0133203	>0.05
P07153	RPN1_RAT	Dolichyl-diphosphooligosaccharide--protein glycosyltransferase subunit 1 (EC 2.4.99.18) (Dolichyl-diphosphooligosaccharide--protein glycosyltransferase 67 kDa subunit) (Ribophorin I) (RPN-I) (Ribophorin-1)	Rpn1	605	4	23.9684	0.0470254	23.9996	0.059461	1.0218	0.0423217	>0.05
P07171	CALB1_RAT	Calbindin (Calbindin D28) (D-28K) (Spot 35 protein) (Vitamin D-dependent calcium-binding protein, avian-type)	Calb1	261	11	25.9069	0.0644353	25.9705	0.064382	1.04503	0.047292	>0.05
P07323	ENOG_RAT	Gamma-enolase (EC 4.2.1.11) (2-phospho-D-glycerate hydro-lyase) (Enolase 2) (Neural enolase) (Neuron-specific enolase) (NSE)	Eno2 Eno-2	434	29	31.245	0.0289393	31.2491	0.0335788	1.00283	0.0233048	>0.05
P07335	KCRB_RAT	Creatine kinase B-type (EC 2.7.3.2) (B-CK) (Creatine kinase B chain)	Ckb Ckbb	381	27	32.2939	0.00626978	32.2882	0.00945372	0.996063	0.00652299	>0.05
P07340	AT1B1_RAT	Sodium/potassium-transporting ATPase subunit beta-1 (Sodium/potassium-dependent ATPase subunit beta-1)	Atp1b1	304	16	30.6443	0.0164808	30.6443	0.0175386	0.999994	0.0122377	>0.05
P07483	FABPH_RAT	Fatty acid-binding protein, heart (Fatty acid-binding protein 3) (Heart-type fatty acid-binding protein) (H-FABP)	Fabp3	133	5	24.3214	0.0342366	24.3246	0.0441057	1.00221	0.0322603	>0.05
P07722	MAG_RAT	Myelin-associated glycoprotein (Brain neuron cytoplasmic protein 3) (Sialic acid-binding Ig-like lectin 4a) (Siglec-4a)	Mag	626	9	25.9552	0.0213175	25.9633	0.0172149	1.00569	0.0118632	>0.05
P07825	SYPH_RAT	Synaptophysin (Major synaptic vesicle protein p38)	Syp	307	6	28.7022	0.0241884	28.7166	0.0237934	1.01004	0.0165047	>0.05
P07895	SODM_RAT	Superoxide dismutase [Mn], mitochondrial (EC 1.15.1.1)	Sod2	222	4	24.7549	0.10196	24.625	0.0721041	0.913897	0.0463606	>0.05
P07936	NEUM_RAT	Neuromodulin (Axonal membrane protein GAP-43) (Growth-associated protein 43) (Protein F1)	Gap43	226	9	29.1425	0.0319038	29.1534	0.0313131	1.00759	0.0219715	>0.05
P07943	ALDR_RAT	Aldose reductase (AR) (EC 1.1.1.21) (Aldehyde reductase)	Akr1b1 Akr1b4 Aldr1	316	9	25.7641	0.0307988	25.7824	0.0286272	1.01277	0.0202821	>0.05
P08009	GSTM4_RAT	Glutathione S-transferase Yb-3 (EC 2.5.1.18) (Chain 4) (GST Yb3) (GST class-mu 3)	Gstm3	218	9	27.0515	0.0274376	27.0371	0.0330419	0.990078	0.0222242	>0.05
P08050	CXA1_RAT	Gap junction alpha-1 protein (Connexin-43) (Cx43) (Gap junction 43 kDa heart protein)	Gja1 Cxn-43	382	8	25.248	0.0323211	25.2874	0.0440839	1.02769	0.0311524	>0.05
P08081	CLCA_RAT	Clathrin light chain A (Lca)	Clta	248	4	23.7095	0.16622	23.5683	0.145827	0.906744	0.0931129	>0.05
P08082	CLCB_RAT	Clathrin light chain B (Lcb)	Cltb	229	4	26.1358	0.0206503	26.1496	0.0378963	1.00962	0.0269959	>0.05
P08413	KCC2B_RAT	Calcium/calmodulin-dependent protein kinase type II subunit beta (CaM kinase II subunit beta) (CaMK-II subunit beta) (EC 2.7.11.17)	Camk2b	542	22	30.0135	0.0127525	29.995	0.0171673	0.987252	0.0116235	>0.05
P08461	ODP2_RAT	Dihydrolipoyllysine-residue acetyltransferase component of pyruvate dehydrogenase complex, mitochondrial (EC 2.3.1.12) (70 kDa mitochondrial autoantigen of primary biliary cirrhosis) (PBC) (Dihydrolipoamide acetyltransferase component of pyruvate dehydrogenase complex) (Pyruvate dehydrogenase complex component E2) (PDC-E2) (PDCE2)	Dlat	632	16	27.8635	0.0350432	27.9235	0.0410163	1.0425	0.0293433	>0.05
P08753	GNAI3_RAT	Guanine nucleotide-binding protein G(k) subunit alpha (G(i) alpha-3)	Gnai3 Gnai-3	354	6	26.1507	0.0260206	26.1809	0.0495047	1.02119	0.0351618	>0.05
P09117	ALDOC_RAT	Fructose-bisphosphate aldolase C (EC 4.1.2.13) (Brain-type aldolase)	Aldoc	363	23	29.7232	0.0182569	29.7101	0.0200919	0.990979	0.0138906	>0.05
P09215	KPCD_RAT	Protein kinase C delta type (EC 2.7.11.13) (nPKC-delta) [Cleaved into: Protein kinase C delta type regulatory subunit; Protein kinase C delta type catalytic subunit (Sphingosine-dependent protein kinase-1) (SDK1)]	Prkcd Pkcd	673	5	24.1099	0.363327	24.2465	0.527047	1.09933	0.48777	>0.05
P09495	TPM4_RAT	Tropomyosin alpha-4 chain (Tropomyosin-4) (TM-4)	Tpm4	248	6	25.8197	0.0332198	25.8356	0.0449772	1.01108	0.0322031	>0.05
P09527	RAB7A_RAT	Ras-related protein Rab-7a (Ras-related protein BRL-RAS) (Ras-related protein p23)	Rab7a Rab7	207	8	24.1781	0.0230445	24.1743	0.0352972	0.997433	0.0242965	>0.05
P09606	GLNA_RAT	Glutamine synthetase (GS) (EC 6.3.1.2) (Glutamate decarboxylase) (EC 4.1.1.15) (Glutamate--ammonia ligase)	Glul Glns	373	12	28.1759	0.039478	28.1375	0.0314479	0.973707	0.0210766	>0.05
P09895	RL5_RAT	60S ribosomal protein L5	Rpl5	297	2	23.1084	0.0609854	23.1807	0.100169	1.0514	0.0760097	>0.05
P09951	SYN1_RAT	Synapsin-1 (Synapsin I)	Syn1	704	30	30.8753	0.0114042	30.8849	0.022687	1.00671	0.0159074	>0.05
P0C0S7	H2AZ_RAT	Histone H2A.Z (H2A/z)	H2afz H2az	128	5	28.1986	0.0134605	28.1685	0.00753224	0.979355	0.00512467	>0.05
P0C5X8	TTYH1_RAT	Protein tweety homolog 1	Ttyh1	450	5	24.2879	0.0215986	24.3209	0.0243893	1.02309	0.0170358	>0.05
P0C643	GRP2_RAT	RAS guanyl-releasing protein 2 (Calcium and DAG-regulated guanine nucleotide exchange factor I) (CalDAG-GEFI)	Rasgrp2	608	5	21.8184	0.0210911	21.8132	0.0385527	0.996389	0.0268215	>0.05
P0C6S7	ANS1B_RAT	Ankyrin repeat and sterile alpha motif domain-containing protein 1B (Amyloid-beta protein intracellular domain-associated protein 1) (AIDA-1) (E2A-PBX1-associated protein) (EB-1)	Anks1b	1260	5	23.5925	0.0332023	23.5676	0.0326816	0.982902	0.0218756	>0.05
P0DJJ3	SGIP1_RAT	SH3-containing GRB2-like protein 3-interacting protein 1 (Endophilin-3-interacting protein)	Sgip1	827	9	24.8681	0.101522	24.7645	0.0771825	0.930723	0.0488599	>0.05
P10111	PPIA_RAT	Peptidyl-prolyl cis-trans isomerase A (PPIase A) (EC 5.2.1.8) (Cyclophilin A) (Cyclosporin A-binding protein) (Rotamase A) (p1B15) (p31) [Cleaved into: Peptidyl-prolyl cis-trans isomerase A, N-terminally processed]	Ppia	164	15	30.3301	0.024139	30.3077	0.034498	0.984537	0.0233492	>0.05
P10536	RAB1B_RAT	Ras-related protein Rab-1B	Rab1b	201	6	25.8404	0.0190034	25.81	0.027103	0.979148	0.018721	>0.05
P10687	PLCB1_RAT	1-phosphatidylinositol 4,5-bisphosphate phosphodiesterase beta-1 (EC 3.1.4.11) (PLC-154) (Phosphoinositide phospholipase C-beta-1) (Phospholipase C-I) (PLC-I) (Phospholipase C-beta-1) (PLC-beta-1)	Plcb1	1216	29	25.77	0.0199039	25.8181	0.025289	1.03388	0.0184287	>0.05
P10760	SAHH_RAT	Adenosylhomocysteinase (AdoHcyase) (EC 3.3.1.1) (S-adenosyl-L-homocysteine hydrolase)	Ahcy	432	9	25.1697	0.0341505	25.2052	0.0432992	1.02486	0.0323183	>0.05
P10818	CX6A1_RAT	Cytochrome c oxidase subunit 6A1, mitochondrial (Cytochrome c oxidase polypeptide VIa-liver)	Cox6a1 Cox6al	111	5	27.4305	0.0468739	27.5073	0.0254769	1.05464	0.0185138	>0.05
P10824	GNAI1_RAT	Guanine nucleotide-binding protein G(i) subunit alpha-1 (Adenylate cyclase-inhibiting G alpha protein)	Gnai1 Gnai-1	354	11	27.1925	0.0165749	27.2215	0.0255348	1.02027	0.0182037	>0.05
P10860	DHE3_RAT	Glutamate dehydrogenase 1, mitochondrial (GDH 1) (EC 1.4.1.3) (Memory-related gene 2 protein) (MRG-2)	Glud1 Glud	558	24	28.4642	0.017562	28.4544	0.021221	0.993244	0.014705	>0.05
P10888	COX41_RAT	Cytochrome c oxidase subunit 4 isoform 1, mitochondrial (Cytochrome c oxidase polypeptide IV) (Cytochrome c oxidase subunit IV isoform 1) (COX IV-1)	Cox4i1 Cox4 Cox4a	169	11	28.5698	0.0405547	28.5418	0.0344763	0.980795	0.0245948	>0.05
P11030	ACBP_RAT	Acyl-CoA-binding protein (ACBP) (Diazepam-binding inhibitor) (DBI) (Endozepine) (EP) [Cleaved into: Triakontatetraneuropeptide (TTN); Octadecaneuropeptide (ODN)]	Dbi	87	3	26.1131	0.040319	26.0388	0.0574615	0.949793	0.0382886	>0.05
P11167	GTR1_RAT	Solute carrier family 2, facilitated glucose transporter member 1 (Glucose transporter type 1, erythrocyte/brain) (GLUT-1)	Slc2a1 Glut-1 Glut1	492	3	22.563	0.0434359	22.4561	0.0430076	0.928551	0.0282151	>0.05
P11232	THIO_RAT	Thioredoxin (Trx)	Txn Txn1	105	2	23.9411	0.265611	23.8559	0.331186	0.942654	0.27567	>0.05
P11240	COX5A_RAT	Cytochrome c oxidase subunit 5A, mitochondrial (Cytochrome c oxidase polypeptide Va)	Cox5a	146	7	28.9579	0.013248	28.9598	0.0249034	1.00133	0.0174457	>0.05
P11275	KCC2A_RAT	Calcium/calmodulin-dependent protein kinase type II subunit alpha (CaM kinase II subunit alpha) (CaMK-II subunit alpha) (EC 2.7.11.17)	Camk2a	478	20	30.4422	0.0162012	30.435	0.0188517	0.994992	0.0129413	>0.05
P11348	DHPR_RAT	Dihydropteridine reductase (EC 1.5.1.34) (HDHPR) (Quinoid dihydropteridine reductase)	Qdpr Dhpr	241	13	26.6625	0.0298039	26.7226	0.0310034	1.0425	0.0234693	>0.05
P11442	CLH1_RAT	Clathrin heavy chain 1	Cltc	1675	73	31.253	0.0110945	31.2486	0.0151336	0.996949	0.010429	>0.05
P11506	AT2B2_RAT	Plasma membrane calcium-transporting ATPase 2 (PMCA2) (EC 3.6.3.8) (Plasma membrane calcium ATPase isoform 2) (Plasma membrane calcium pump isoform 2)	Atp2b2	1243	27	28.0384	0.014963	28.0377	0.017278	0.999541	0.0121354	>0.05
P11517	HBB2_RAT	Hemoglobin subunit beta-2 (Beta-2-globin) (Hemoglobin beta chain, minor-form) (Hemoglobin beta-2 chain)	0	147	14	31.333	0.0271513	31.302	0.0199006	0.978708	0.0135303	>0.05
P11598	PDIA3_RAT	Protein disulfide-isomerase A3 (EC 5.3.4.1) (58 kDa glucose-regulated protein) (58 kDa microsomal protein) (p58) (Disulfide isomerase ER-60) (Endoplasmic reticulum resident protein 57) (ER protein 57) (ERp57) (Endoplasmic reticulum resident protein 60) (ER protein 60) (ERp60) (HIP-70) (Q-2)	Pdia3 Erp60 Grp58	505	20	26.6153	0.0341886	26.616	0.0602753	1.0005	0.0414726	>0.05
P11730	KCC2G_RAT	Calcium/calmodulin-dependent protein kinase type II subunit gamma (CaM kinase II subunit gamma) (CaMK-II subunit gamma) (EC 2.7.11.17)	Camk2g	527	15	29.6635	0.00869205	29.6363	0.0141188	0.981312	0.00959335	>0.05
P11915	NLTP_RAT	Non-specific lipid-transfer protein (NSL-TP) (EC 2.3.1.176) (Propanoyl-CoA C-acyltransferase) (SCP-chi) (SCPX) (Sterol carrier protein 2) (SCP-2) (Sterol carrier protein X) (SCP-X)	Scp2 Scp-2	547	3	21.7259	0.0258925	21.6783	0.0454595	0.967544	0.0302901	>0.05
P11951	CX6C2_RAT	Cytochrome c oxidase subunit 6C-2 (Cytochrome c oxidase polypeptide VIc-2)	Cox6c2 Cox6c	76	3	26.0965	0.0398258	25.9796	0.0344155	0.922199	0.0217423	<0.05
P11980	KPYM_RAT	Pyruvate kinase PKM (EC 2.7.1.40) (Pyruvate kinase muscle isozyme)	Pkm Pkm2 Pykm	531	39	31.4448	0.0153014	31.4589	0.007769	1.00979	0.005457	>0.05
P12001	RL18_RAT	60S ribosomal protein L18	Rpl18	188	3	22.154	0.0250618	22.1174	0.0601627	0.974976	0.0402249	>0.05
P12007	IVD_RAT	Isovaleryl-CoA dehydrogenase, mitochondrial (IVD) (EC 1.3.8.4)	Ivd	424	3	22.1869	0.0353532	22.1024	0.0421518	0.943139	0.027802	>0.05
P12075	COX5B_RAT	Cytochrome c oxidase subunit 5B, mitochondrial (Cytochrome c oxidase polypeptide Vb) (Cytochrome c oxidase subunit VIA*)	Cox5b	129	7	27.3741	0.0192444	27.3851	0.0294538	1.00765	0.0204024	>0.05
P12368	KAP2_RAT	cAMP-dependent protein kinase type II-alpha regulatory subunit	Prkar2a	401	9	25.1206	0.0283516	25.1342	0.0482509	1.00949	0.0335147	>0.05
P12369	KAP3_RAT	cAMP-dependent protein kinase type II-beta regulatory subunit	Prkar2b	416	14	27.5968	0.0140018	27.6196	0.0205156	1.01595	0.0143429	>0.05
P12785	FAS_RAT	Fatty acid synthase (EC 2.3.1.85) [Includes: [Acyl-carrier-protein] S-acetyltransferase (EC 2.3.1.38); [Acyl-carrier-protein] S-malonyltransferase (EC 2.3.1.39); 3-oxoacyl-[acyl-carrier-protein] synthase (EC 2.3.1.41); 3-oxoacyl-[acyl-carrier-protein] reductase (EC 1.1.1.100); 3-hydroxyacyl-[acyl-carrier-protein] dehydratase (EC 4.2.1.59); Enoyl-[acyl-carrier-protein] reductase (EC 1.3.1.39); Ole…	Fasn	2505	16	24.4332	0.029482	24.4457	0.0267461	1.00872	0.0183309	>0.05
P12839	NFM_RAT	Neurofilament medium polypeptide (NF-M) (160 kDa neurofilament protein) (Neurofilament 3) (Neurofilament triplet M protein)	Nefm Nef3 Nfm	846	26	28.749	0.0363957	28.7138	0.0417201	0.975943	0.0287631	>0.05
P13084	NPM_RAT	Nucleophosmin (NPM) (Nucleolar phosphoprotein B23) (Nucleolar protein NO38) (Numatrin)	Npm1	292	3	22.2935	0.0406856	22.375	0.0520293	1.05812	0.037508	>0.05
P13086	SUCA_RAT	Succinyl-CoA ligase [ADP/GDP-forming] subunit alpha, mitochondrial (EC 6.2.1.4) (EC 6.2.1.5) (Succinyl-CoA synthetase subunit alpha) (SCS-alpha)	Suclg1	346	7	26.1829	0.0550287	26.0797	0.10089	0.930975	0.0573105	>0.05
P13221	AATC_RAT	Aspartate aminotransferase, cytoplasmic (cAspAT) (EC 2.6.1.1) (EC 2.6.1.3) (Cysteine aminotransferase, cytoplasmic) (Cysteine transaminase, cytoplasmic) (cCAT) (Glutamate oxaloacetate transaminase 1) (Transaminase A)	Got1	413	17	27.6604	0.0542353	27.6118	0.0519736	0.966883	0.0355279	>0.05
P13233	CN37_RAT	2',3'-cyclic-nucleotide 3'-phosphodiesterase (CNP) (CNPase) (EC 3.1.4.37)	Cnp Cnp1	420	24	31.845	0.0297161	31.8725	0.0271732	1.01922	0.0191161	>0.05
P13234	KCC4_RAT	Calcium/calmodulin-dependent protein kinase type IV (CaMK IV) (EC 2.7.11.17) (CaM kinase-GR) (Calspermin)	Camk4	474	6	22.3585	0.0233476	22.387	0.0263509	1.01995	0.0190455	>0.05
P13264	GLSK_RAT	Glutaminase kidney isoform, mitochondrial (GLS) (EC 3.5.1.2) (K-glutaminase) (L-glutamine amidohydrolase) [Cleaved into: Glutaminase kidney isoform 68 kDa chain; Glutaminase kidney isoform 65 kDa chain]	Gls	674	21	26.5107	0.0461192	26.5012	0.0496412	0.993423	0.0330233	>0.05
P13383	NUCL_RAT	Nucleolin (Protein C23)	Ncl Nuc	713	6	23.36	0.025249	23.3761	0.02303	1.01123	0.0162771	>0.05
P13471	RS14_RAT	40S ribosomal protein S14	Rps14	151	2	20.3236	0.512821	19.7866	0.380504	0.689212	0.238994	>0.05
P13596	NCAM1_RAT	Neural cell adhesion molecule 1 (N-CAM-1) (NCAM-1) (CD antigen CD56)	Ncam1 Ncam	858	29	28.6032	0.0215706	28.6137	0.0363344	1.00731	0.0254282	>0.05
P13668	STMN1_RAT	Stathmin (Leukemia-associated phosphoprotein p18) (Metablastin) (Oncoprotein 18) (Op18) (Phosphoprotein p19) (pp19) (Pr22 protein) (Prosolin) (pp17)	Stmn1 Lap18	149	5	26.3686	0.0315285	26.3373	0.0531268	0.978521	0.0367467	>0.05
P13803	ETFA_RAT	Electron transfer flavoprotein subunit alpha, mitochondrial (Alpha-ETF)	Etfa	333	7	23.9542	0.110164	24.133	0.173896	1.132	0.171749	>0.05
P14046	A1I3_RAT	Alpha-1-inhibitor 3 (Alpha-1-inhibitor 3 variant II) (Alpha-1-inhibitor III)	A1i3 Mug1	1477	13	23.769	0.0393691	23.808	0.0362119	1.02742	0.025865	>0.05
P14173	DDC_RAT	Aromatic-L-amino-acid decarboxylase (AADC) (EC 4.1.1.28) (DOPA decarboxylase) (DDC)	Ddc	480	7	22.0403	0.0455396	22.1752	0.0528017	1.09803	0.0405453	>0.05
P14604	ECHM_RAT	Enoyl-CoA hydratase, mitochondrial (EC 4.2.1.17) (Enoyl-CoA hydratase 1) (Short-chain enoyl-CoA hydratase) (SCEH)	Echs1	290	4	24.5541	0.0855146	24.7212	0.0677539	1.12273	0.0532333	>0.05
P14668	ANXA5_RAT	Annexin A5 (Anchorin CII) (Annexin V) (Annexin-5) (Calphobindin I) (CBP-I) (Endonexin II) (Lipocortin V) (Placental anticoagulant protein 4) (PP4) (Placental anticoagulant protein I) (PAP-I) (Thromboplastin inhibitor) (Vascular anticoagulant-alpha) (VAC-alpha)	Anxa5 Anx5	319	9	25.2405	0.0168248	25.2668	0.0221039	1.01836	0.0158144	>0.05
P14669	ANXA3_RAT	Annexin A3 (35-alpha calcimedin) (Annexin III) (Annexin-3) (Lipocortin III) (Placental anticoagulant protein III) (PAP-III)	Anxa3 Anx3	324	4	22.3066	0.0271362	22.3569	0.0176772	1.03543	0.0128045	>0.05
P14841	CYTC_RAT	Cystatin-C (Cystatin-3)	Cst3	140	2	25.3631	0.0457335	25.2697	0.038215	0.937323	0.0247069	>0.05
P14882	PCCA_RAT	Propionyl-CoA carboxylase alpha chain, mitochondrial (PCCase subunit alpha) (EC 6.4.1.3) (Propanoyl-CoA:carbon dioxide ligase subunit alpha)	Pcca	737	5	20.5607	0.050963	20.5226	0.0689479	0.97392	0.0478632	>0.05
P15650	ACADL_RAT	Long-chain specific acyl-CoA dehydrogenase, mitochondrial (LCAD) (EC 1.3.8.8)	Acadl	430	4	22.2306	0.0861613	22.2426	0.0998113	1.00836	0.0743084	>0.05
P15791	KCC2D_RAT	Calcium/calmodulin-dependent protein kinase type II subunit delta (CaM kinase II subunit delta) (CaMK-II subunit delta) (EC 2.7.11.17)	Camk2d	533	7	29.6858	0.00994699	29.6531	0.0158663	0.977572	0.0108283	>0.05
P15865	H14_RAT	Histone H1.4 (H1d)	Hist1h1e H1f4	219	5	27.7379	0.0868192	27.7301	0.114605	0.994609	0.0778756	>0.05
P15999	ATPA_RAT	ATP synthase subunit alpha, mitochondrial	Atp5a1	553	27	31.7208	0.00667686	31.6994	0.0133936	0.985332	0.00916059	>0.05
P16086	SPTN1_RAT	Spectrin alpha chain, non-erythrocytic 1 (Alpha-II spectrin) (Fodrin alpha chain)	Sptan1 Spna2 Spta2	2472	140	31.2084	0.0210298	31.2194	0.0278104	1.00765	0.0192123	>0.05
P16446	PIPNA_RAT	Phosphatidylinositol transfer protein alpha isoform (PI-TP-alpha) (PtdIns transfer protein alpha) (PtdInsTP alpha)	Pitpna Pitpn	271	5	24.4531	0.0409266	24.4608	0.0200614	1.00537	0.0141614	>0.05
P16617	PGK1_RAT	Phosphoglycerate kinase 1 (EC 2.7.2.3)	Pgk1 Pgk-1	417	29	29.9684	0.00640116	29.9773	0.0130799	1.00619	0.0091495	>0.05
P16638	ACLY_RAT	ATP-citrate synthase (EC 2.3.3.8) (ATP-citrate (pro-S-)-lyase) (Citrate cleavage enzyme)	Acly	1100	17	24.6872	0.0139483	24.6857	0.0115372	0.999011	0.00808665	>0.05
P17105	IP3KA_RAT	Inositol-trisphosphate 3-kinase A (EC 2.7.1.127) (Inositol 1,4,5-trisphosphate 3-kinase A) (IP3 3-kinase A) (IP3K A) (InsP 3-kinase A)	Itpka	459	4	22.4275	0.0555366	22.6126	0.0536142	1.1369	0.0429955	<0.05
P17764	THIL_RAT	Acetyl-CoA acetyltransferase, mitochondrial (EC 2.3.1.9) (Acetoacetyl-CoA thiolase)	Acat1	424	12	26.7834	0.0161725	26.79	0.0229875	1.00457	0.0157153	>0.05
P18088	DCE1_RAT	Glutamate decarboxylase 1 (EC 4.1.1.15) (67 kDa glutamic acid decarboxylase) (GAD-67) (Glutamate decarboxylase 67 kDa isoform)	Gad1 Gad67	593	3	21.1207	0.0279509	21.1217	0.0314071	1.00076	0.0216615	>0.05
P18265	GSK3A_RAT	Glycogen synthase kinase-3 alpha (GSK-3 alpha) (EC 2.7.11.26) (Factor A) (FA) (Serine/threonine-protein kinase GSK3A) (EC 2.7.11.1)	Gsk3a	483	7	23.1827	0.0232502	23.1884	0.024203	1.004	0.0168408	>0.05
P18266	GSK3B_RAT	Glycogen synthase kinase-3 beta (GSK-3 beta) (EC 2.7.11.26) (Factor A) (FA) (Serine/threonine-protein kinase GSK3B) (EC 2.7.11.1)	Gsk3b	420	5	22.5911	0.0454789	22.6063	0.0714296	1.01057	0.0526551	>0.05
P18297	SPRE_RAT	Sepiapterin reductase (SPR) (EC 1.1.1.153)	Spr	262	3	20.6095	0.152684	20.8612	0.136556	1.19066	0.115878	>0.05
P18418	CALR_RAT	Calreticulin (CALBP) (CRP55) (Calcium-binding protein 3) (CABP3) (Calregulin) (Endoplasmic reticulum resident protein 60) (ERp60) (HACBP)	Calr	416	12	26.9242	0.038024	26.8763	0.0358742	0.967398	0.0240713	>0.05
P18484	AP2A2_RAT	AP-2 complex subunit alpha-2 (100 kDa coated vesicle protein C) (Adaptor protein complex AP-2 subunit alpha-2) (Adaptor-related protein complex 2 subunit alpha-2) (Alpha-adaptin C) (Alpha2-adaptin) (Clathrin assembly protein complex 2 alpha-C large chain) (Plasma membrane adaptor HA2/AP2 adaptin alpha C subunit)	Ap2a2 Adtab	938	34	27.6965	0.0271995	27.7291	0.0258463	1.02286	0.0183352	>0.05
P18666	ML12B_RAT	Myosin regulatory light chain 12B (Myosin RLC-B) (Myosin regulatory light chain 2-B, smooth muscle isoform) (MLC-2) (Myosin regulatory light chain 20 kDa) (MLC20) (Myosin regulatory light chain MRLC2)	Myl12b Mrlc2 Mrlcb Mylc2b	172	5	23.518	0.0722763	23.3916	0.0890907	0.916111	0.0552344	>0.05
P19103	PPR1A_RAT	Protein phosphatase 1 regulatory subunit 1A (Protein phosphatase inhibitor 1) (I-1) (IPP-1)	Ppp1r1a Ipp1	171	5	22.641	0.0329505	22.5366	0.0577129	0.930181	0.0375856	>0.05
P19139	CSK21_RAT	Casein kinase II subunit alpha (CK II alpha) (EC 2.7.11.1)	Csnk2a1	391	11	26.3705	0.0395417	26.3428	0.0245677	0.980963	0.0167905	>0.05
P19234	NDUV2_RAT	NADH dehydrogenase [ubiquinone] flavoprotein 2, mitochondrial (EC 1.6.5.3) (EC 1.6.99.3) (NADH-ubiquinone oxidoreductase 24 kDa subunit)	Ndufv2	248	7	25.6383	0.0584351	25.7151	0.0627474	1.05466	0.0460723	>0.05
P19490	GRIA1_RAT	Glutamate receptor 1 (GluR-1) (AMPA-selective glutamate receptor 1) (GluR-A) (GluR-K1) (Glutamate receptor ionotropic, AMPA 1) (GluA1)	Gria1 Glur1	907	5	22.0522	0.115613	22.1952	0.0831501	1.10425	0.0655301	>0.05
P19492	GRIA3_RAT	Glutamate receptor 3 (GluR-3) (AMPA-selective glutamate receptor 3) (GluR-C) (GluR-K3) (Glutamate receptor ionotropic, AMPA 3) (GluA3)	Gria3 Glur3	888	5	23.2464	0.0471791	23.335	0.037013	1.06336	0.0274497	>0.05
P19511	AT5F1_RAT	ATP synthase F(0) complex subunit B1, mitochondrial (ATP synthase subunit b) (ATPase subunit b)	Atp5f1 Atp5f	256	10	28.0975	0.0458141	28.0364	0.0552368	0.958558	0.0374234	>0.05
P19527	NFL_RAT	Neurofilament light polypeptide (NF-L) (68 kDa neurofilament protein) (Neurofilament triplet L protein)	Nefl Nf68 Nfl	542	27	29.3683	0.0297298	29.3911	0.0412839	1.01593	0.0290318	>0.05
P19627	GNAZ_RAT	Guanine nucleotide-binding protein G(z) subunit alpha (G(x) alpha chain) (Gz-alpha)	Gnaz	355	7	24.4024	0.0338048	24.4263	0.0296203	1.01672	0.0208595	>0.05
P19643	AOFB_RAT	Amine oxidase [flavin-containing] B (EC 1.4.3.4) (Monoamine oxidase type B) (MAO-B)	Maob	520	7	23.5329	0.0320255	23.5797	0.0457442	1.03301	0.033193	>0.05
P19804	NDKB_RAT	Nucleoside diphosphate kinase B (NDK B) (NDP kinase B) (EC 2.7.4.6) (Histidine protein kinase NDKB) (EC 2.7.13.3) (P18)	Nme2	152	14	28.708	0.0490334	28.746	0.0559413	1.02672	0.038888	>0.05
P19944	RLA1_RAT	60S acidic ribosomal protein P1	Rplp1	114	2	24.1033	0.0434155	24.1256	0.0413878	1.0156	0.0283441	>0.05
P19945	RLA0_RAT	60S acidic ribosomal protein P0 (60S ribosomal protein L10E)	Rplp0 Arbp	317	6	24.8477	0.0274851	24.8411	0.0258181	0.9954	0.0175224	>0.05
P20070	NB5R3_RAT	NADH-cytochrome b5 reductase 3 (B5R) (Cytochrome b5 reductase) (EC 1.6.2.2) (Diaphorase-1) [Cleaved into: NADH-cytochrome b5 reductase 3 membrane-bound form; NADH-cytochrome b5 reductase 3 soluble form]	Cyb5r3 Dia1	301	2	22.0117	0.0421353	21.9764	0.067118	0.975806	0.046227	>0.05
P20171	RASH_RAT	GTPase HRas (H-Ras-1) (Transforming protein p21) (c-H-ras) (p21ras) [Cleaved into: GTPase HRas, N-terminally processed]	Hras Hras1	189	6	23.7583	0.0428333	23.7824	0.0556953	1.01688	0.0416214	>0.05
P20650	PPM1A_RAT	Protein phosphatase 1A (EC 3.1.3.16) (Protein phosphatase 2C isoform alpha) (PP2C-alpha) (Protein phosphatase IA)	Ppm1a Pp2c1 Pppm1a	382	6	22.9596	0.0463811	23.1347	0.0579712	1.12898	0.045134	<0.05
P20651	PP2BB_RAT	Serine/threonine-protein phosphatase 2B catalytic subunit beta isoform (EC 3.1.3.16) (CAM-PRP catalytic subunit) (Calmodulin-dependent calcineurin A subunit beta isoform)	Ppp3cb	525	15	27.7801	0.0292207	27.8286	0.0307473	1.03418	0.0218828	>0.05
P20788	UCRI_RAT	Cytochrome b-c1 complex subunit Rieske, mitochondrial (EC 1.10.2.2) (Complex III subunit 5) (Cytochrome b-c1 complex subunit 5) (Liver regeneration-related protein LRRGT00195) (Rieske iron-sulfur protein) (RISP) (Ubiquinol-cytochrome c reductase iron-sulfur subunit) [Cleaved into: Cytochrome b-c1 complex subunit 11 (Complex III subunit IX) (Ubiquinol-cytochrome c reductase 8 kDa protein)]	Uqcrfs1	274	7	27.2688	0.0411003	27.2171	0.0572118	0.964768	0.0381678	>0.05
P21396	AOFA_RAT	Amine oxidase [flavin-containing] A (EC 1.4.3.4) (Monoamine oxidase type A) (MAO-A)	Maoa	526	7	23.6762	0.0338162	23.677	0.053243	1.00053	0.0388639	>0.05
P21531	RL3_RAT	60S ribosomal protein L3 (L4)	Rpl3	403	5	22.1185	0.0384517	22.186	0.0412623	1.0479	0.0303788	>0.05
P21533	RL6_RAT	60S ribosomal protein L6 (Neoplasm-related protein C140)	Rpl6	298	7	23.5938	0.0570177	23.6701	0.0461045	1.05433	0.0334331	>0.05
P21571	ATP5J_RAT	ATP synthase-coupling factor 6, mitochondrial (ATPase subunit F6)	Atp5j	108	10	28.2519	0.0283294	28.1892	0.0231672	0.957466	0.0154844	>0.05
P21575	DYN1_RAT	Dynamin-1 (EC 3.6.5.5) (B-dynamin) (D100) (Dynamin, brain)	Dnm1 Dnm	864	37	29.5859	0.0129868	29.5871	0.0121954	1.00082	0.00843209	>0.05
P21707	SYT1_RAT	Synaptotagmin-1 (Synaptotagmin I) (SytI) (p65)	Syt1	421	22	28.7775	0.014496	28.7788	0.0230153	1.00086	0.0158767	>0.05
P21913	SDHB_RAT	Succinate dehydrogenase [ubiquinone] iron-sulfur subunit, mitochondrial (EC 1.3.5.1) (Iron-sulfur subunit of complex II) (Ip)	Sdhb Sdh1	282	6	24.596	0.0256181	24.5532	0.0360301	0.97076	0.0242929	>0.05
P22062	PIMT_RAT	Protein-L-isoaspartate(D-aspartate) O-methyltransferase (PIMT) (EC 2.1.1.77) (L-isoaspartyl protein carboxyl methyltransferase) (Protein L-isoaspartyl/D-aspartyl methyltransferase) (Protein-beta-aspartate methyltransferase)	Pcmt1	227	9	27.0346	0.0290699	27.0292	0.0385197	0.996241	0.0264929	>0.05
P22063	CNTN2_RAT	Contactin-2 (Axonal glycoprotein TAG-1) (Axonin-1) (Transient axonal glycoprotein 1) (TAX-1)	Cntn2 Tax1	1040	4	21.8493	0.0216988	21.8056	0.0330988	0.970167	0.0232905	>0.05
P23358	RL12_RAT	60S ribosomal protein L12	Rpl12	165	5	23.8049	0.0718534	23.7946	0.0609081	0.992888	0.0432581	>0.05
P23514	COPB_RAT	Coatomer subunit beta (Beta-coat protein) (Beta-COP)	Copb1 Copb	953	4	20.9157	0.129364	21.1746	0.0701469	1.19656	0.0588426	>0.05
P23565	AINX_RAT	Alpha-internexin (Alpha-Inx)	Ina Inexa	505	26	29.9893	0.019796	30.0277	0.0238616	1.02696	0.0172607	>0.05
P23965	ECI1_RAT	Enoyl-CoA delta isomerase 1, mitochondrial (EC 5.3.3.8) (3,2-trans-enoyl-CoA isomerase) (Delta(3),Delta(2)-enoyl-CoA isomerase) (D3,D2-enoyl-CoA isomerase) (Dodecenoyl-CoA isomerase)	Eci1 Dci	289	2	21.8539	0.0847953	22.0746	0.0771324	1.16529	0.0665172	>0.05
P23977	SC6A3_RAT	Sodium-dependent dopamine transporter (DA transporter) (DAT) (Solute carrier family 6 member 3)	Slc6a3	619	2	22.0668	0.0237585	22.0237	0.0306704	0.970559	0.0204087	>0.05
P23978	SC6A1_RAT	Sodium- and chloride-dependent GABA transporter 1 (GAT-1) (Solute carrier family 6 member 1)	Slc6a1 Gabt1 Gat-1 Gat1	599	4	25.2404	0.0431734	25.236	0.0411091	0.996974	0.0280771	>0.05
P24049	RL17_RAT	60S ribosomal protein L17 (Amino acid starvation-induced protein) (ASI) (L23)	Rpl17	184	2	22.6618	0.0795146	22.7228	0.118696	1.04323	0.086751	>0.05
P24155	THOP1_RAT	Thimet oligopeptidase (EC 3.4.24.15) (Endo-oligopeptidase A) (Endopeptidase 24.15) (PZ-peptidase) (Soluble metallo-endopeptidase)	Thop1	687	7	23.3587	0.0289008	23.3497	0.0327684	0.993764	0.0228278	>0.05
P24329	THTR_RAT	Thiosulfate sulfurtransferase (EC 2.8.1.1) (Rhodanese)	Tst	297	6	24.6936	0.0336113	24.6926	0.0359878	0.999315	0.0256332	>0.05
P24368	PPIB_RAT	Peptidyl-prolyl cis-trans isomerase B (PPIase B) (EC 5.2.1.8) (CYP-S1) (Cyclophilin B) (Rotamase B) (S-cyclophilin) (SCYLP)	Ppib	216	3	21.574	0.0362691	21.6064	0.026862	1.0227	0.0188732	>0.05
P24942	EAA1_RAT	Excitatory amino acid transporter 1 (Glial glutamate transporter) (Sodium-dependent glutamate/aspartate transporter 1) (GLAST-1) (Solute carrier family 1 member 3)	Slc1a3 Eaat1	543	7	27.7118	0.0397614	27.7494	0.0195787	1.02642	0.0140431	>0.05
P25113	PGAM1_RAT	Phosphoglycerate mutase 1 (EC 3.1.3.13) (EC 5.4.2.11) (EC 5.4.2.4) (BPG-dependent PGAM 1) (Phosphoglycerate mutase isozyme B) (PGAM-B)	Pgam1	254	15	29.8124	0.0132343	29.7938	0.016789	0.987188	0.0114008	>0.05
P25304	AGRIN_RAT	Agrin [Cleaved into: Agrin N-terminal 110 kDa subunit; Agrin C-terminal 110 kDa subunit; Agrin C-terminal 90 kDa fragment (C90); Agrin C-terminal 22 kDa fragment (C22)]	Agrn Agrin	1959	2	28.1597	0.134348	28.1349	0.158774	0.983011	0.0988085	>0.05
P26284	ODPA_RAT	Pyruvate dehydrogenase E1 component subunit alpha, somatic form, mitochondrial (EC 1.2.4.1) (PDHE1-A type I)	Pdha1	390	17	28.0189	0.0177152	28.0312	0.0232467	1.00857	0.0161794	>0.05
P26453	BASI_RAT	Basigin (Glycoprotein CE9) (OX-47 antigen) (CD antigen CD147)	Bsg	388	6	24.0135	0.0362123	24.0677	0.0413638	1.03829	0.0296649	>0.05
P26772	CH10_RAT	10 kDa heat shock protein, mitochondrial (Hsp10) (10 kDa chaperonin) (Chaperonin 10) (CPN10)	Hspe1	102	6	27.4091	0.0257882	27.3846	0.0219547	0.983132	0.0150711	>0.05
P27139	CAH2_RAT	Carbonic anhydrase 2 (EC 4.2.1.1) (Carbonate dehydratase II) (Carbonic anhydrase II) (CA-II)	Ca2	260	9	26.1086	0.0472999	26.1437	0.0347129	1.02458	0.0238063	>0.05
P27274	CD59_RAT	CD59 glycoprotein (MAC-inhibitory protein) (MAC-IP) (Membrane attack complex inhibition factor) (MACIF) (Protectin) (CD antigen CD59)	Cd59	126	2	21.541	0.0382537	21.5762	0.0629757	1.0247	0.0444265	>0.05
P27605	HPRT_RAT	Hypoxanthine-guanine phosphoribosyltransferase (HGPRT) (HGPRTase) (EC 2.4.2.8)	Hprt1 Hprt	218	5	24.0547	0.0256559	24.0126	0.0179729	0.971217	0.0120596	>0.05
P27653	C1TC_RAT	C-1-tetrahydrofolate synthase, cytoplasmic (C1-THF synthase) [Cleaved into: C-1-tetrahydrofolate synthase, cytoplasmic, N-terminally processed] [Includes: Methylenetetrahydrofolate dehydrogenase (EC 1.5.1.5); Methenyltetrahydrofolate cyclohydrolase (EC 3.5.4.9); Formyltetrahydrofolate synthetase (EC 6.3.4.3)]	Mthfd1 Mthfd	935	10	22.2489	0.0430533	22.2136	0.0458216	0.97582	0.0312037	>0.05
P27682	7B2_RAT	Neuroendocrine protein 7B2 (Secretogranin V) (Secretogranin-5) (Secretory granule endocrine protein I) [Cleaved into: N-terminal peptide; C-terminal peptide]	Scg5 Sgne1	210	2	21.8786	0.070802	21.8396	0.0764568	0.973311	0.0522998	>0.05
P28075	PSB5_RAT	Proteasome subunit beta type-5 (EC 3.4.25.1) (Macropain epsilon chain) (Multicatalytic endopeptidase complex epsilon chain) (Proteasome chain 6) (Proteasome epsilon chain) (Proteasome subunit X)	Psmb5	263	2	21.3868	0.0328484	21.4638	0.0853726	1.05477	0.066735	>0.05
P28480	TCPA_RAT	T-complex protein 1 subunit alpha (TCP-1-alpha) (CCT-alpha)	Tcp1 Cct1 Ccta	556	14	25.754	0.0277122	25.7543	0.0517516	1.00017	0.03508	>0.05
P29066	ARRB1_RAT	Beta-arrestin-1 (Arrestin beta-1)	Arrb1	418	2	20.2795	0.0488671	20.4061	0.0452631	1.09174	0.0353316	>0.05
P29147	BDH_RAT	D-beta-hydroxybutyrate dehydrogenase, mitochondrial (BDH) (EC 1.1.1.30) (3-hydroxybutyrate dehydrogenase)	Bdh1 Bdh	343	4	22.7999	0.0373992	22.8638	0.0375931	1.04534	0.0267269	>0.05
P29266	3HIDH_RAT	3-hydroxyisobutyrate dehydrogenase, mitochondrial (HIBADH) (EC 1.1.1.31)	Hibadh	335	4	23.0715	0.0405249	23.085	0.0372869	1.00939	0.026035	>0.05
P29314	RS9_RAT	40S ribosomal protein S9	Rps9	194	2	20.8573	0.0688787	20.8592	0.0599338	1.00133	0.0410325	>0.05
P29315	RINI_RAT	Ribonuclease inhibitor (Ribonuclease/angiogenin inhibitor 1)	Rnh1 Rnh	456	8	22.3212	0.0809675	22.1878	0.0787116	0.911671	0.0567444	>0.05
P29411	KAD3_RAT	GTP:AMP phosphotransferase AK3, mitochondrial (EC 2.7.4.10) (Adenylate kinase 3) (AK 3) (Adenylate kinase 3 alpha-like 1)	Ak3 Ak3l1 Akl3l	227	2	21.1187	0.022248	21.1672	0.0384759	1.03414	0.0289278	>0.05
P29419	ATP5I_RAT	ATP synthase subunit e, mitochondrial (ATPase subunit e)	Atp5i	71	2	24.0597	0.115343	23.9854	0.134778	0.949822	0.0986822	>0.05
P30009	MARCS_RAT	Myristoylated alanine-rich C-kinase substrate (MARCKS) (Protein kinase C substrate 80 kDa protein)	Marcks Macs	309	10	27.4026	0.0561526	27.4203	0.0760754	1.01239	0.0515863	>0.05
P30427	PLEC_RAT	Plectin (PCN) (PLTN) (Plectin-1)	Plec Plec1	4687	51	25.4918	0.025309	25.5266	0.0279677	1.02442	0.0204108	>0.05
P30835	PFKAL_RAT	ATP-dependent 6-phosphofructokinase, liver type (ATP-PFK) (PFK-L) (EC 2.7.1.11) (6-phosphofructokinase type B) (Phosphofructo-1-kinase isozyme B) (PFK-B) (Phosphohexokinase)	Pfkl Pfk-l	780	12	25.2955	0.0257169	25.2905	0.0346492	0.996562	0.0248973	>0.05
P31000	VIME_RAT	Vimentin	Vim	466	13	26.7299	0.116306	26.7195	0.139144	0.992822	0.104659	>0.05
P31016	DLG4_RAT	Disks large homolog 4 (Postsynaptic density protein 95) (PSD-95) (Synapse-associated protein 90) (SAP-90) (SAP90)	Dlg4 Dlgh4 Psd95	724	18	26.2974	0.0114361	26.3091	0.0140863	1.00811	0.00992682	>0.05
P31044	PEBP1_RAT	Phosphatidylethanolamine-binding protein 1 (PEBP-1) (23 kDa morphine-binding protein) (HCNPpp) (P23K) [Cleaved into: Hippocampal cholinergic neurostimulating peptide (HCNP)]	Pebp1 Pbp Pebp	187	9	29.2847	0.0247603	29.2621	0.03757	0.984479	0.0252146	>0.05
P31399	ATP5H_RAT	ATP synthase subunit d, mitochondrial (ATPase subunit d)	Atp5h Atp5jd	161	14	28.3461	0.0207966	28.3368	0.0166014	0.993578	0.0114723	>0.05
P31422	GRM3_RAT	Metabotropic glutamate receptor 3 (mGluR3)	Grm3 Gprc1c Mglur3	879	7	21.8414	0.0291112	21.9555	0.0266467	1.08228	0.0202685	<0.01
P31424	GRM5_RAT	Metabotropic glutamate receptor 5 (mGluR5)	Grm5 Gprc1e Mglur5	1203	2	19.7741	0.0496058	19.804	0.0552292	1.02099	0.0410895	>0.05
P31596	EAA2_RAT	Excitatory amino acid transporter 2 (GLT-1) (Sodium-dependent glutamate/aspartate transporter 2) (GLUT-R) (Solute carrier family 1 member 2)	Slc1a2 Eaat2 Glt1	573	15	30.1398	0.0193445	30.1771	0.0119104	1.0262	0.00846923	>0.05
P31647	S6A11_RAT	Sodium- and chloride-dependent GABA transporter 3 (GAT-3) (Solute carrier family 6 member 11)	Slc6a11 Gabt3 Gat-3 Gat-b	627	3	22.922	0.0456211	22.9749	0.0494052	1.03733	0.0364599	>0.05
P31662	S6A17_RAT	Sodium-dependent neutral amino acid transporter SLC6A17 (Sodium-dependent neurotransmitter transporter NTT4) (Solute carrier family 6 member 17)	Slc6a17 Ntt4 Rxt1	727	5	23.6742	0.054726	23.7158	0.0917319	1.02926	0.0619183	>0.05
P31977	EZRI_RAT	Ezrin (Cytovillin) (Villin-2) (p81)	Ezr Vil2	586	10	23.4909	0.039874	23.4444	0.0339309	0.968293	0.0225127	>0.05
P32551	QCR2_RAT	Cytochrome b-c1 complex subunit 2, mitochondrial (Complex III subunit 2) (Core protein II) (Ubiquinol-cytochrome-c reductase complex core protein 2)	Uqcrc2	452	18	29.1212	0.0213679	29.1295	0.0355662	1.00577	0.024465	>0.05
P32736	OPCM_RAT	Opioid-binding protein/cell adhesion molecule (OBCAM) (OPCML) (Opioid-binding cell adhesion molecule)	Opcml Obcam	345	5	25.2499	0.036959	25.2489	0.0495378	0.999337	0.0325553	>0.05
P33124	ACSL6_RAT	Long-chain-fatty-acid--CoA ligase 6 (EC 6.2.1.3) (Long-chain acyl-CoA synthetase 6) (LACS 6) (Long-chain-fatty-acid--CoA ligase, brain isozyme)	Acsl6 Acs2 Facl6	697	13	23.6621	0.0463846	23.7419	0.045407	1.05686	0.0327802	>0.05
P34058	HS90B_RAT	Heat shock protein HSP 90-beta (Heat shock 84 kDa) (HSP 84) (HSP84)	Hsp90ab1 Hsp84 Hspcb	724	35	29.4943	0.0149051	29.5045	0.0162164	1.00708	0.0114165	>0.05
P35171	CX7A2_RAT	Cytochrome c oxidase subunit 7A2, mitochondrial (Cytochrome c oxidase subunit VIIa-liver/heart) (Cytochrome c oxidase subunit VIIa-L)	Cox7a2 Cox7a3 Cox7al	83	3	25.0843	0.0280296	24.9917	0.0314479	0.937878	0.0202612	<0.05
P35213	1433B_RAT	14-3-3 protein beta/alpha (Prepronerve growth factor RNH-1) (Protein kinase C inhibitor protein 1) (KCIP-1) [Cleaved into: 14-3-3 protein beta/alpha, N-terminally processed]	Ywhab	246	13	30.66	0.0122681	30.6583	0.0206227	0.998805	0.0141016	>0.05
P35234	PTN5_RAT	Tyrosine-protein phosphatase non-receptor type 5 (EC 3.1.3.48) (Neural-specific protein-tyrosine phosphatase) (Striatum-enriched protein-tyrosine phosphatase) (STEP)	Ptpn5	369	6	23.44	0.0231021	23.4554	0.0275544	1.01074	0.0193915	>0.05
P35280	RAB8A_RAT	Ras-related protein Rab-8A	Rab8a Rab8	207	5	25.25	0.0366048	25.2274	0.049584	0.984427	0.0347014	>0.05
P35332	HPCL4_RAT	Hippocalcin-like protein 4 (Neural visinin-like protein 2) (NVL-2) (NVP-2) (Visinin-like protein 2) (VILIP-2)	Hpcal4	191	5	24.8328	0.0365094	24.8329	0.0283342	1.00009	0.0200272	>0.05
P35439	NMDZ1_RAT	Glutamate receptor ionotropic, NMDA 1 (GluN1) (Glutamate [NMDA] receptor subunit zeta-1) (N-methyl-D-aspartate receptor subunit NR1) (NMD-R1)	Grin1 Nmdar1	938	3	20.2185	0.060502	20.2703	0.0463571	1.0366	0.0350021	>0.05
P35465	PAK1_RAT	Serine/threonine-protein kinase PAK 1 (EC 2.7.11.1) (Alpha-PAK) (Protein kinase MUK2) (p21-activated kinase 1) (PAK-1) (p68-PAK)	Pak1	544	10	24.3213	0.0244739	24.3393	0.0264247	1.01256	0.0185465	>0.05
P35565	CALX_RAT	Calnexin	Canx	591	13	26.0256	0.0337118	26.0195	0.0476181	0.995749	0.0312717	>0.05
P35571	GPDM_RAT	Glycerol-3-phosphate dehydrogenase, mitochondrial (GPD-M) (GPDH-M) (EC 1.1.5.3)	Gpd2	727	6	22.4091	0.0285273	22.4054	0.0288669	0.997435	0.0194224	>0.05
P35704	PRDX2_RAT	Peroxiredoxin-2 (EC 1.11.1.15) (Thiol-specific antioxidant protein) (TSA) (Thioredoxin peroxidase 1) (Thioredoxin-dependent peroxide reductase 1)	Prdx2 Tdpx1	198	8	27.995	0.0182752	28.0113	0.0155823	1.01135	0.0108147	>0.05
P36201	CRIP2_RAT	Cysteine-rich protein 2 (CRP-2) (Protein ESP1)	Crip2 Crp2	208	4	25.8953	0.031102	25.9188	0.0303261	1.01641	0.0215933	>0.05
P36876	2ABA_RAT	Serine/threonine-protein phosphatase 2A 55 kDa regulatory subunit B alpha isoform (PP2A subunit B isoform B55-alpha) (PP2A subunit B isoform BRA) (PP2A subunit B isoform PR55-alpha) (PP2A subunit B isoform R2-alpha) (PP2A subunit B isoform alpha)	Ppp2r2a	447	6	24.2469	0.0844311	24.2889	0.0822044	1.02953	0.0590763	>0.05
P36970	GPX41_RAT	Phospholipid hydroperoxide glutathione peroxidase, mitochondrial (PHGPx) (EC 1.11.1.12) (Glutathione peroxidase 4) (GPx-4) (GSHPx-4)	Gpx4	197	2	22.7992	0.100425	22.72	0.180916	0.94659	0.108047	>0.05
P36972	APT_RAT	Adenine phosphoribosyltransferase (APRT) (EC 2.4.2.7)	Aprt	180	3	21.9202	0.0587702	21.8764	0.0634202	0.970145	0.0415739	>0.05
P37285	KLC1_RAT	Kinesin light chain 1 (KLC 1)	Klc1 Klc Kns2	560	5	21.7102	0.0402502	21.7323	0.0617791	1.01545	0.0451123	>0.05
P37377	SYUA_RAT	Alpha-synuclein	Snca	140	7	29.2134	0.0290439	29.2219	0.0367244	1.00594	0.0262098	>0.05
P37397	CNN3_RAT	Calponin-3 (Calponin, acidic isoform) (Calponin, non-muscle isoform)	Cnn3	330	3	19.7105	0.0408439	19.8096	0.0668093	1.07106	0.0483673	>0.05
P37805	TAGL3_RAT	Transgelin-3 (Neuronal protein 22) (NP22) (Neuronal protein NP25)	Tagln3 Np25	199	7	26.0506	0.022846	26.077	0.0149545	1.01849	0.0105572	>0.05
P37996	ARL3_RAT	ADP-ribosylation factor-like protein 3 (ARD3)	Arl3	182	4	21.8123	0.0494763	21.8719	0.0391923	1.04213	0.0285587	>0.05
P38650	DYHC1_RAT	Cytoplasmic dynein 1 heavy chain 1 (Cytoplasmic dynein heavy chain 1) (Dynein heavy chain, cytosolic) (MAP 1C)	Dync1h1 Dhc1 Dnch1 Dnchc1 Dnec1 Dyhc Map1c	4644	84	27.4838	0.0170935	27.5035	0.0124416	1.01373	0.00877224	>0.05
P38656	LA_RAT	Lupus La protein homolog (La autoantigen homolog) (La ribonucleoprotein)	Ssb Ss-b	415	2	18.7761	0.0849865	18.8165	0.161787	1.0284	0.128847	>0.05
P38718	MPC2_RAT	Mitochondrial pyruvate carrier 2 (Brain protein 44) (Protein 0-44)	Mpc2 Brp44	127	2	23.3418	0.120954	22.9622	0.197645	0.768661	0.102257	>0.05
P38983	RSSA_RAT	40S ribosomal protein SA (37 kDa laminin receptor precursor) (37LRP) (37/67 kDa laminin receptor) (LRP/LR) (67 kDa laminin receptor) (67LR) (Laminin receptor 1) (LamR) (Laminin-binding protein precursor p40) (LBP/p40)	Rpsa Lamr1	295	6	25.1175	0.0275056	25.0947	0.0346802	0.984309	0.0233077	>0.05
P39052	DYN2_RAT	Dynamin-2 (EC 3.6.5.5)	Dnm2 Dyn2	870	12	27.0931	0.0390826	27.0519	0.0367723	0.971855	0.0245123	>0.05
P39069	KAD1_RAT	Adenylate kinase isoenzyme 1 (AK 1) (EC 2.7.4.3) (EC 2.7.4.6) (ATP-AMP transphosphorylase 1) (ATP:AMP phosphotransferase) (Adenylate monophosphate kinase) (Myokinase)	Ak1	194	9	25.44	0.0735657	25.5771	0.0247083	1.09973	0.0185102	>0.05
P40112	PSB3_RAT	Proteasome subunit beta type-3 (EC 3.4.25.1) (Proteasome chain 13) (Proteasome component C10-II) (Proteasome theta chain)	Psmb3	205	2	20.9897	0.0736515	21.0734	0.0962687	1.05971	0.0764483	>0.05
P40241	CD9_RAT	CD9 antigen (CD antigen CD9)	Cd9	226	3	24.8013	0.0433001	24.8493	0.0495093	1.03383	0.0364402	>0.05
P41498	PPAC_RAT	Low molecular weight phosphotyrosine protein phosphatase (LMW-PTP) (LMW-PTPase) (EC 3.1.3.48) (Low molecular weight cytosolic acid phosphatase) (EC 3.1.3.2)	Acp1	158	5	22.9598	0.0313884	22.9296	0.0443362	0.97927	0.0291332	>0.05
P41499	PTN11_RAT	Tyrosine-protein phosphatase non-receptor type 11 (EC 3.1.3.48) (Protein-tyrosine phosphatase 1D) (PTP-1D) (Protein-tyrosine phosphatase SYP) (SH-PTP2) (SHP-2) (Shp2)	Ptpn11	597	2	21.2815	0.0603487	21.3078	0.0527391	1.01846	0.0390737	>0.05
P41542	USO1_RAT	General vesicular transport factor p115 (Protein USO1 homolog) (Transcytosis-associated protein) (TAP) (Vesicle-docking protein)	Uso1 Vdp	959	5	22.0892	0.0438478	22.1294	0.055546	1.02826	0.0393925	>0.05
P41562	IDHC_RAT	Isocitrate dehydrogenase [NADP] cytoplasmic (IDH) (EC 1.1.1.42) (Cytosolic NADP-isocitrate dehydrogenase) (IDP) (NADP(+)-specific ICDH) (Oxalosuccinate decarboxylase)	Idh1	414	5	21.1655	0.0380405	21.2644	0.0511469	1.07095	0.0390375	>0.05
P42123	LDHB_RAT	L-lactate dehydrogenase B chain (LDH-B) (EC 1.1.1.27) (LDH heart subunit) (LDH-H)	Ldhb Ldh-2 Ldh2	334	20	30.6015	0.0214277	30.6055	0.0252548	1.00276	0.0176828	>0.05
P43138	APEX1_RAT	DNA-(apurinic or apyrimidinic site) lyase (EC 3.1.-.-) (EC 4.2.99.18) (APEX nuclease) (APEN) (Apurinic-apyrimidinic endonuclease 1) (AP endonuclease 1) (REF-1) (Redox factor-1) [Cleaved into: DNA-(apurinic or apyrimidinic site) lyase, mitochondrial]	Apex1 Ape Apex Ref1	317	3	20.8498	0.0485373	20.9434	0.0618134	1.06706	0.0438049	>0.05
P43244	MATR3_RAT	Matrin-3 (Nuclear scaffold protein p130/MAT3)	Matr3	845	12	25.3199	0.039829	25.3706	0.0412391	1.03572	0.0283046	>0.05
P43425	GBG7_RAT	Guanine nucleotide-binding protein G(I)/G(S)/G(O) subunit gamma-7	Gng7 Gngt7	68	4	27.4678	0.0261151	27.4243	0.0359865	0.970305	0.0234934	>0.05
P45479	PPT1_RAT	Palmitoyl-protein thioesterase 1 (PPT-1) (EC 3.1.2.22) (Palmitoyl-protein hydrolase 1)	Ppt1 Ppt	306	2	21.5064	0.0567671	21.5699	0.023128	1.04503	0.0164739	>0.05
P45592	COF1_RAT	Cofilin-1 (Cofilin, non-muscle isoform)	Cfl1	166	13	29.7262	0.0123356	29.7317	0.0139654	1.00378	0.00965613	>0.05
P45953	ACADV_RAT	Very long-chain specific acyl-CoA dehydrogenase, mitochondrial (VLCAD) (EC 1.3.8.9)	Acadvl Vlcad	655	3	23.5667	0.125666	23.4787	0.158689	0.940819	0.115419	>0.05
P46101	DPP6_RAT	Dipeptidyl aminopeptidase-like protein 6 (DPPX) (Dipeptidyl aminopeptidase-related protein) (Dipeptidyl peptidase 6) (Dipeptidyl peptidase IV-like protein) (Dipeptidyl peptidase VI) (DPP VI)	Dpp6	859	10	23.8675	0.0767641	23.7139	0.0414773	0.899036	0.0262465	>0.05
P46462	TERA_RAT	Transitional endoplasmic reticulum ATPase (TER ATPase) (EC 3.6.4.6) (15S Mg(2+)-ATPase p97 subunit) (Valosin-containing protein) (VCP)	Vcp	806	29	27.2586	0.0113958	27.2565	0.0149159	0.99853	0.0102161	>0.05
P46844	BIEA_RAT	Biliverdin reductase A (BVR A) (EC 1.3.1.24) (Biliverdin-IX alpha-reductase)	Blvra Blvr	295	3	21.402	0.0303929	21.3896	0.055419	0.991454	0.0394667	>0.05
P47727	CBR1_RAT	Carbonyl reductase [NADPH] 1 (EC 1.1.1.184) (15-hydroxyprostaglandin dehydrogenase [NADP(+)]) (EC 1.1.1.197) (20-beta-hydroxysteroid dehydrogenase) (NADPH-dependent carbonyl reductase 1) (Prostaglandin 9-ketoreductase) (Prostaglandin-E(2) 9-reductase) (EC 1.1.1.189)	Cbr1 Cbr	277	6	25.7421	0.183948	25.9944	0.167582	1.19113	0.138686	>0.05
P47728	CALB2_RAT	Calretinin (CR)	Calb2	271	5	24.9484	0.0804675	24.9883	0.0879955	1.02805	0.0642388	>0.05
P47819	GFAP_RAT	Glial fibrillary acidic protein (GFAP)	Gfap	430	16	27.7049	0.0136876	27.719	0.012974	1.00981	0.00901964	>0.05
P47860	PFKAP_RAT	ATP-dependent 6-phosphofructokinase, platelet type (ATP-PFK) (PFK-P) (EC 2.7.1.11) (6-phosphofructokinase type C) (Phosphofructo-1-kinase isozyme C) (PFK-C) (Phosphohexokinase)	Pfkp Pfkc	788	21	27.2519	0.0337895	27.1802	0.0303181	0.951496	0.0196583	>0.05
P47863	AQP4_RAT	Aquaporin-4 (AQP-4) (Mercurial-insensitive water channel) (MIWC) (WCH4)	Aqp4	323	6	25.7189	0.0302839	25.7179	0.0460527	0.999323	0.0322825	>0.05
P47875	CSRP1_RAT	Cysteine and glycine-rich protein 1 (Cysteine-rich protein 1) (CRP) (CRP1)	Csrp1 Csrp	193	4	24.4005	0.0343029	24.3749	0.0384504	0.98243	0.025822	>0.05
P47942	DPYL2_RAT	Dihydropyrimidinase-related protein 2 (DRP-2) (Collapsin response mediator protein 2) (CRMP-2) (Turned on after division 64 kDa protein) (TOAD-64)	Dpysl2	572	37	32.2068	0.00652116	32.2158	0.0163337	1.00629	0.0115346	>0.05
P47971	NPTX1_RAT	Neuronal pentraxin-1 (NP1) (47 kDa taipoxin-binding protein) (Neuronal pentraxin I) (NP-I)	Nptx1	432	2	21.6599	0.0535664	21.7076	0.0415031	1.03357	0.0289035	>0.05
P48004	PSA7_RAT	Proteasome subunit alpha type-7 (EC 3.4.25.1) (Proteasome subunit RC6-1)	Psma7	254	3	20.1887	0.063889	20.2495	0.144721	1.04303	0.116276	>0.05
P48500	TPIS_RAT	Triosephosphate isomerase (TIM) (EC 5.3.1.1) (Triose-phosphate isomerase)	Tpi1	249	15	30.1756	0.0403513	30.1537	0.0374385	0.984931	0.0259911	>0.05
P48721	GRP75_RAT	Stress-70 protein, mitochondrial (75 kDa glucose-regulated protein) (GRP-75) (Heat shock 70 kDa protein 9) (Mortalin) (Peptide-binding protein 74) (PBP74) (mtHSP70)	Hspa9 Grp75 Hspa9a	679	18	27.0743	0.0168214	27.0751	0.0124007	1.00057	0.00860802	>0.05
P48768	NAC2_RAT	Sodium/calcium exchanger 2 (Na(+)/Ca(2+)-exchange protein 2) (Solute carrier family 8 member 2)	Slc8a2 Ncx2	921	14	26.434	0.0489792	26.4701	0.0573155	1.02534	0.0388132	>0.05
P49242	RS3A_RAT	40S ribosomal protein S3a (V-fos transformation effector protein) [Cleaved into: 40S ribosomal protein S3b]	Rps3a Fte-1 Fte1	264	4	23.8724	0.027495	23.9263	0.0263801	1.03812	0.0193025	>0.05
P49432	ODPB_RAT	Pyruvate dehydrogenase E1 component subunit beta, mitochondrial (PDHE1-B) (EC 1.2.4.1)	Pdhb	359	16	27.7603	0.0131682	27.7503	0.0115581	0.993145	0.00790405	>0.05
P49803	RGS7_RAT	Regulator of G-protein signaling 7 (RGS7)	Rgs7	477	9	25.7308	0.0765681	25.79	0.0983681	1.04186	0.0725031	>0.05
P49911	AN32A_RAT	Acidic leucine-rich nuclear phosphoprotein 32 family member A (Leucine-rich acidic nuclear protein) (LANP)	Anp32a Lanp	247	3	22.4822	0.043396	22.4061	0.0484411	0.948662	0.0317602	>0.05
P50398	GDIA_RAT	Rab GDP dissociation inhibitor alpha (Rab GDI alpha) (Guanosine diphosphate dissociation inhibitor 1) (GDI-1)	Gdi1 Rabgdia	447	35	29.5177	0.0299602	29.5292	0.033349	1.008	0.0231723	>0.05
P50399	GDIB_RAT	Rab GDP dissociation inhibitor beta (Rab GDI beta) (GDI-3) (Guanosine diphosphate dissociation inhibitor 2) (GDI-2)	Gdi2 Gdi3	445	23	28.0488	0.0621763	28.021	0.0644022	0.980929	0.0440537	>0.05
P50408	VATF_RAT	V-type proton ATPase subunit F (V-ATPase subunit F) (V-ATPase 14 kDa subunit) (Vacuolar proton pump subunit F)	Atp6v1f Atp6s14 Vatf	119	5	24.0726	0.0655679	24.094	0.0756953	1.01495	0.0592232	>0.05
P50411	IPP2_RAT	Protein phosphatase inhibitor 2 (IPP-2)	Ppp1r2 Ipp2	205	2	23.1387	0.0705207	23.1778	0.0682885	1.02748	0.0476941	>0.05
P50475	SYAC_RAT	Alanine--tRNA ligase, cytoplasmic (EC 6.1.1.7) (Alanyl-tRNA synthetase) (AlaRS)	Aars	968	7	23.4687	0.13491	23.7253	0.125524	1.19466	0.112357	>0.05
P50503	F10A1_RAT	Hsc70-interacting protein (Hip) (Protein FAM10A1) (Protein ST13 homolog)	St13 Fam10a1 Hip	368	7	24.4848	0.0398621	24.5117	0.0460779	1.01882	0.032111	>0.05
P50554	GABT_RAT	4-aminobutyrate aminotransferase, mitochondrial (EC 2.6.1.19) ((S)-3-amino-2-methylpropionate transaminase) (EC 2.6.1.22) (GABA aminotransferase) (GABA-AT) (Gamma-amino-N-butyrate transaminase) (GABA transaminase) (GABA-T) (L-AIBAT) [Cleaved into: 4-aminobutyrate aminotransferase, brain isoform; 4-aminobutyrate aminotransferase, liver isoform]	Abat Gabat	500	22	28.817	0.02542	28.8323	0.0411751	1.01071	0.0281956	>0.05
P51635	AK1A1_RAT	Alcohol dehydrogenase [NADP(+)] (EC 1.1.1.2) (3-DG-reducing enzyme) (Aldehyde reductase) (Aldo-keto reductase family 1 member A1)	Akr1a1 Alr	325	11	25.6397	0.0502714	25.6502	0.0570664	1.00733	0.0417262	>0.05
P51647	AL1A1_RAT	Retinal dehydrogenase 1 (RALDH 1) (RalDH1) (EC 1.2.1.36) (ALDH-E1) (ALHDII) (Aldehyde dehydrogenase family 1 member A1) (Aldehyde dehydrogenase, cytosolic)	Aldh1a1 Aldh	501	12	23.9503	0.063659	23.9374	0.0545466	0.991076	0.0376283	>0.05
P52481	CAP2_RAT	Adenylyl cyclase-associated protein 2 (CAP 2)	Cap2	477	12	24.8844	0.0297996	24.8923	0.040807	1.00543	0.0289329	>0.05
P52555	ERP29_RAT	Endoplasmic reticulum resident protein 29 (ERp29) (Endoplasmic reticulum resident protein 31) (ERp31)	Erp29	260	5	22.7318	0.0588586	22.5733	0.0858061	0.895946	0.0541866	>0.05
P52873	PYC_RAT	Pyruvate carboxylase, mitochondrial (EC 6.4.1.1) (Pyruvic carboxylase) (PCB)	Pc	1178	18	24.7507	0.0422636	24.7113	0.0541395	0.973047	0.0339696	>0.05
P54290	CA2D1_RAT	Voltage-dependent calcium channel subunit alpha-2/delta-1 (Voltage-gated calcium channel subunit alpha-2/delta-1) [Cleaved into: Voltage-dependent calcium channel subunit alpha-2-1; Voltage-dependent calcium channel subunit delta-1]	Cacna2d1 Cacnl2a Cchl2a	1091	13	23.8917	0.0226135	23.953	0.0246305	1.04339	0.0180248	>0.05
P54311	GBB1_RAT	Guanine nucleotide-binding protein G(I)/G(S)/G(T) subunit beta-1 (Transducin beta chain 1)	Gnb1	340	12	29.0314	0.0226195	29.0653	0.0213377	1.0238	0.0151199	>0.05
P54313	GBB2_RAT	Guanine nucleotide-binding protein G(I)/G(S)/G(T) subunit beta-2 (G protein subunit beta-2) (Transducin beta chain 2)	Gnb2	340	10	28.1149	0.0277973	28.1428	0.0219206	1.01953	0.0155596	>0.05
P54319	PLAP_RAT	Phospholipase A-2-activating protein (PLA2P) (PLAP)	Plaa Plap	795	3	20.4923	0.0936784	20.5538	0.0404804	1.04355	0.0293803	>0.05
P54921	SNAA_RAT	Alpha-soluble NSF attachment protein (SNAP-alpha) (N-ethylmaleimide-sensitive factor attachment protein alpha)	Napa Snap Snapa	295	13	26.7904	0.04111	26.8344	0.0434489	1.03094	0.0300161	>0.05
P55051	FABP7_RAT	Fatty acid-binding protein, brain (Brain lipid-binding protein) (BLBP) (Brain-type fatty acid-binding protein) (B-FABP) (Fatty acid-binding protein 7)	Fabp7 Blbp	132	3	24.2606	0.0367067	24.2474	0.0338072	0.99089	0.0240337	>0.05
P55053	FABP5_RAT	Fatty acid-binding protein, epidermal (Cutaneous fatty acid-binding protein) (C-FABP) (DA11) (Epidermal-type fatty acid-binding protein) (E-FABP) (Fatty acid-binding protein 5)	Fabp5	135	5	23.8535	0.0444624	23.938	0.0392878	1.06037	0.0283341	>0.05
P56558	OGT1_RAT	UDP-N-acetylglucosamine--peptide N-acetylglucosaminyltransferase 110 kDa subunit (EC 2.4.1.255) (O-GlcNAc transferase subunit p110) (O-linked N-acetylglucosamine transferase 110 kDa subunit) (OGT)	Ogt	1036	5	21.8216	0.0389703	21.868	0.0383168	1.03265	0.0270589	>0.05
P56571	ES1_RAT	ES1 protein homolog, mitochondrial	0	266	8	25.6078	0.0204512	25.5819	0.0348144	0.98218	0.0231811	>0.05
P56574	IDHP_RAT	Isocitrate dehydrogenase [NADP], mitochondrial (IDH) (EC 1.1.1.42) (ICD-M) (IDP) (NADP(+)-specific ICDH) (Oxalosuccinate decarboxylase)	Idh2	452	7	22.9015	0.0671755	22.9905	0.0596199	1.06364	0.0451503	>0.05
P56603	SCAM1_RAT	Secretory carrier-associated membrane protein 1 (Secretory carrier membrane protein 1) (SCAMP 37)	Scamp1 Scamp	338	3	24.1389	0.0230028	24.1358	0.018704	0.997829	0.0130257	>0.05
P59215	GNAO_RAT	Guanine nucleotide-binding protein G(o) subunit alpha	Gnao1 Gna0 Gnao	354	21	30.1625	0.019528	30.1594	0.0154826	0.997863	0.0105649	>0.05
P60203	MYPR_RAT	Myelin proteolipid protein (PLP) (Lipophilin)	Plp1 Plp	277	7	32.4147	0.0156149	32.4515	0.0230408	1.0259	0.0164582	>0.05
P60522	GBRL2_RAT	Gamma-aminobutyric acid receptor-associated protein-like 2 (GABA(A) receptor-associated protein-like 2) (Ganglioside expression factor 2) (GEF-2) (Golgi-associated ATPase enhancer of 16 kDa) (GATE-16)	Gabarapl2 Gef2	117	2	21.1283	0.0301423	21.1429	0.0607267	1.01015	0.0456269	>0.05
P60711	ACTB_RAT	Actin, cytoplasmic 1 (Beta-actin) [Cleaved into: Actin, cytoplasmic 1, N-terminally processed]	Actb	375	28	33.3823	0.00724657	33.3742	0.0136559	0.994411	0.00929688	>0.05
P60841	ENSA_RAT	Alpha-endosulfine (ARPP-19e)	Ensa	121	5	24.6632	0.065509	24.6005	0.0899133	0.957438	0.0604396	>0.05
P60868	RS20_RAT	40S ribosomal protein S20	Rps20	119	2	22.1793	0.0688245	22.0508	0.0808247	0.914818	0.048857	>0.05
P60881	SNP25_RAT	Synaptosomal-associated protein 25 (SNAP-25) (Super protein) (SUP) (Synaptosomal-associated 25 kDa protein)	Snap25 Snap	206	11	27.4843	0.0323269	27.5845	0.0317352	1.07192	0.0233226	<0.05
P60892	PRPS1_RAT	Ribose-phosphate pyrophosphokinase 1 (EC 2.7.6.1) (Phosphoribosyl pyrophosphate synthase I) (PRS-I)	Prps1	318	7	24.7038	0.099876	24.7671	0.113024	1.04486	0.0771542	>0.05
P60901	PSA6_RAT	Proteasome subunit alpha type-6 (EC 3.4.25.1) (Macropain iota chain) (Multicatalytic endopeptidase complex iota chain) (Proteasome iota chain)	Psma6	246	2	20.6652	0.0757478	20.856	0.199586	1.14137	0.182764	>0.05
P60905	DNJC5_RAT	DnaJ homolog subfamily C member 5 (Cysteine string protein) (CSP)	Dnajc5 Csp	198	7	26.4198	0.0485886	26.4507	0.0314557	1.02165	0.0219993	>0.05
P61023	CHP1_RAT	Calcineurin B homologous protein 1 (Calcineurin B-like protein) (Calcium-binding protein CHP) (Calcium-binding protein p22) (EF-hand calcium-binding domain-containing protein p22)	Chp1 Chp	195	2	19.4537	0.0740513	19.621	0.0963862	1.12296	0.0795589	>0.05
P61203	CSN2_RAT	COP9 signalosome complex subunit 2 (SGN2) (Signalosome subunit 2) (Alien homolog) (JAB1-containing signalosome subunit 2) (Thyroid receptor-interacting protein 15) (TR-interacting protein 15) (TRIP-15)	Cops2 Csn2 Trip15	443	2	20.8833	0.146344	20.6782	0.195227	0.867493	0.0942814	>0.05
P61227	RAP2B_RAT	Ras-related protein Rap-2b	Rap2b	183	3	22.1348	0.0274361	22.1035	0.0150022	0.978523	0.0102969	>0.05
P61265	STX1B_RAT	Syntaxin-1B (P35B) (Syntaxin-1B2)	Stx1b Stx1b2	288	16	28.6617	0.0467369	28.7256	0.0615803	1.04528	0.046674	>0.05
P61314	RL15_RAT	60S ribosomal protein L15	Rpl15	204	2	20.5978	0.176843	20.3397	0.196681	0.83618	0.135544	>0.05
P61589	RHOA_RAT	Transforming protein RhoA	Rhoa Arha Arha2	193	3	23.9583	0.0377551	23.9428	0.032841	0.989298	0.0223209	>0.05
P61765	STXB1_RAT	Syntaxin-binding protein 1 (N-Sec1) (Protein unc-18 homolog 1) (Unc18-1) (Protein unc-18 homolog A) (Unc-18A) (p67) (rbSec1)	Stxbp1 Unc18a	594	41	31.2328	0.0134599	31.231	0.0117826	0.998724	0.00820405	>0.05
P61983	1433G_RAT	14-3-3 protein gamma [Cleaved into: 14-3-3 protein gamma, N-terminally processed]	Ywhag	247	13	30.4027	0.00752731	30.4205	0.0151219	1.01238	0.010607	>0.05
P62076	TIM13_RAT	Mitochondrial import inner membrane translocase subunit Tim13	Timm13 Tim13a Timm13a	95	2	24.0733	0.0274999	24.044	0.0852901	0.979869	0.0576376	>0.05
P62083	RS7_RAT	40S ribosomal protein S7 (S8)	Rps7	194	2	22.8407	0.0353479	22.9015	0.0331716	1.04309	0.0243535	>0.05
P62138	PP1A_RAT	Serine/threonine-protein phosphatase PP1-alpha catalytic subunit (PP-1A) (EC 3.1.3.16)	Ppp1ca Ppp1a	330	11	27.0418	0.0227268	27.0707	0.0237644	1.02022	0.0168105	>0.05
P62142	PP1B_RAT	Serine/threonine-protein phosphatase PP1-beta catalytic subunit (PP-1B) (EC 3.1.3.16) (EC 3.1.3.53)	Ppp1cb	327	13	26.997	0.0233695	27.0312	0.0232359	1.02396	0.0164709	>0.05
P62161	CALM_RAT	Calmodulin (CaM)	Calm1 Calm Cam Cam1; Calm2 Cam2 Camb; Calm3 Cam3 Camc	149	11	31.0374	0.0465726	30.963	0.0497341	0.949719	0.0336222	>0.05
P62168	NCS1_RAT	Neuronal calcium sensor 1 (NCS-1) (Frequenin homolog) (Frequenin-like protein) (Frequenin-like ubiquitous protein)	Ncs1 Flup Freq	190	4	22.466	0.0466214	22.377	0.0460391	0.940175	0.0286053	>0.05
P62193	PRS4_RAT	26S protease regulatory subunit 4 (P26s4) (26S proteasome AAA-ATPase subunit RPT2) (Proteasome 26S subunit ATPase 1)	Psmc1	440	3	21.7209	0.0439839	21.6905	0.0260115	0.979175	0.0178505	>0.05
P62250	RS16_RAT	40S ribosomal protein S16	Rps16	146	5	22.469	0.0431973	22.4165	0.0487471	0.964247	0.0325215	>0.05
P62260	1433E_RAT	14-3-3 protein epsilon (14-3-3E) (Mitochondrial import stimulation factor L subunit) (MSF L)	Ywhae	255	24	30.702	0.014515	30.7111	0.0207879	1.00632	0.0145884	>0.05
P62271	RS18_RAT	40S ribosomal protein S18	Rps18	152	4	23.7041	0.0598243	23.7159	0.0670014	1.00822	0.0445412	>0.05
P62329	TYB4_RAT	Thymosin beta-4 (T beta 4) [Cleaved into: Hematopoietic system regulatory peptide (Seraspenide)]	Tmsb4x Thyb4 Tmsb4	44	2	25.358	0.133025	25.2722	0.137642	0.94227	0.0902058	>0.05
P62332	ARF6_RAT	ADP-ribosylation factor 6	Arf6	175	2	18.7023	0.0648939	18.9728	0.0911782	1.2063	0.0790223	<0.05
P62483	KCAB2_RAT	Voltage-gated potassium channel subunit beta-2 (EC 1.1.1.-) (K(+) channel subunit beta-2) (Kv-beta-2)	Kcnab2 Ckbeta2 Kcnb3	367	5	22.5729	0.0852002	22.6968	0.0387123	1.08966	0.0303787	>0.05
P62630	EF1A1_RAT	Elongation factor 1-alpha 1 (EF-1-alpha-1) (Elongation factor Tu) (EF-Tu) (Eukaryotic elongation factor 1 A-1) (eEF1A-1)	Eef1a1 Eef1a	462	16	29.2539	0.0126955	29.2606	0.0154565	1.00464	0.0107271	>0.05
P62632	EF1A2_RAT	Elongation factor 1-alpha 2 (EF-1-alpha-2) (Eukaryotic elongation factor 1 A-2) (eEF1A-2) (Statin-S1)	Eef1a2 Eef1al Stn Stnl	463	17	28.7494	0.012974	28.7712	0.0165748	1.0152	0.0116488	>0.05
P62634	CNBP_RAT	Cellular nucleic acid-binding protein (CNBP) (Zinc finger protein 9)	Cnbp Znf9	177	3	23.5191	0.0729267	23.5419	0.0708991	1.01596	0.0496223	>0.05
P62703	RS4X_RAT	40S ribosomal protein S4, X isoform	Rps4x Rps4	263	5	23.7479	0.0416516	23.7427	0.044585	0.996365	0.0311464	>0.05
P62744	AP2S1_RAT	AP-2 complex subunit sigma (Adaptor protein complex AP-2 subunit sigma) (Adaptor-related protein complex 2 subunit sigma) (Clathrin assembly protein 2 sigma small chain) (Clathrin coat assembly protein AP17) (Clathrin coat-associated protein AP17) (Plasma membrane adaptor AP-2 17 kDa protein) (Sigma-adaptin 3b) (Sigma2-adaptin)	Ap2s1 Ap17 Claps2	142	2	23.6579	0.0657	23.6627	0.0974193	1.0033	0.0674363	>0.05
P62747	RHOB_RAT	Rho-related GTP-binding protein RhoB	Rhob Arhb	196	4	24.9316	0.0308916	24.9055	0.0326649	0.982067	0.022542	>0.05
P62762	VISL1_RAT	Visinin-like protein 1 (VILIP) (21 kDa CABP) (Neural visinin-like protein 1) (NVL-1) (NVP-1)	Vsnl1 Visl1	191	10	27.0309	0.0409109	26.9666	0.0446847	0.956416	0.0297064	>0.05
P62775	MTPN_RAT	Myotrophin (Granule cell differentiation protein) (Protein V-1)	Mtpn Gcdp	118	4	26.5807	0.0149163	26.5806	0.0255668	0.99993	0.0179424	>0.05
P62804	H4_RAT	Histone H4 [Cleaved into: Osteogenic growth peptide (OGP)]	Hist1h4b Hist4; Hist1h4m; Hist4h4 H4ft	103	7	29.8946	0.0119561	29.865	0.00989545	0.979711	0.00672592	>0.05
P62813	GBRA1_RAT	Gamma-aminobutyric acid receptor subunit alpha-1 (GABA(A) receptor subunit alpha-1)	Gabra1 Gabra-1	455	2	19.6663	0.0590341	19.7975	0.0478693	1.09523	0.0373045	>0.05
P62815	VATB2_RAT	V-type proton ATPase subunit B, brain isoform (V-ATPase subunit B 2) (Endomembrane proton pump 58 kDa subunit) (Vacuolar proton pump subunit B 2)	Atp6v1b2 Atp6b2 Vat2	511	28	28.9347	0.028053	28.9169	0.039807	0.987742	0.0268538	>0.05
P62824	RAB3C_RAT	Ras-related protein Rab-3C	Rab3c	227	8	25.1087	0.0218092	25.1292	0.0294916	1.01431	0.0204981	>0.05
P62828	RAN_RAT	GTP-binding nuclear protein Ran (GTPase Ran) (Ras-like protein TC4) (Ras-related nuclear protein)	Ran	216	6	25.1534	0.0143219	25.1436	0.0215396	0.993264	0.0148994	>0.05
P62832	RL23_RAT	60S ribosomal protein L23	Rpl23	140	2	23.2468	0.0611303	23.3676	0.0217494	1.08735	0.0163033	>0.05
P62836	RAP1A_RAT	Ras-related protein Rap-1A (Ras-related protein Krev-1)	Rap1a Krev1	184	7	25.1941	0.0240939	25.1679	0.0315836	0.982029	0.0217144	>0.05
P62853	RS25_RAT	40S ribosomal protein S25	Rps25	125	2	18.9207	0.0770376	19.0276	0.0674604	1.0769	0.053895	>0.05
P62870	ELOB_RAT	Transcription elongation factor B polypeptide 2 (Elongin 18 kDa subunit) (Elongin-B) (EloB) (RNA polymerase II transcription factor SIII subunit B) (SIII p18)	Tceb2	118	3	22.6596	0.0197013	22.6298	0.0259135	0.979587	0.017661	>0.05
P62882	GBB5_RAT	Guanine nucleotide-binding protein subunit beta-5 (Gbeta5) (Transducin beta chain 5)	Gnb5	353	5	24.0277	0.045102	24.0293	0.0452271	1.00113	0.0299066	>0.05
P62890	RL30_RAT	60S ribosomal protein L30	Rpl30	115	3	21.4378	0.0703813	21.4747	0.0687253	1.02593	0.0464146	>0.05
P62902	RL31_RAT	60S ribosomal protein L31	Rpl31	125	3	21.6554	0.0782312	21.6338	0.0713045	0.9851	0.0487888	>0.05
P62909	RS3_RAT	40S ribosomal protein S3 (EC 4.2.99.18)	Rps3	243	5	24.273	0.0170635	24.2501	0.0243466	0.984229	0.0165956	>0.05
P62914	RL11_RAT	60S ribosomal protein L11	Rpl11	178	2	21.2072	0.0732109	21.2135	0.0949584	1.00435	0.0704485	>0.05
P62919	RL8_RAT	60S ribosomal protein L8	Rpl8	257	2	22.7319	0.0707219	22.7719	0.0723439	1.0281	0.0532696	>0.05
P62944	AP2B1_RAT	AP-2 complex subunit beta (AP105B) (Adaptor protein complex AP-2 subunit beta) (Adaptor-related protein complex 2 subunit beta) (Beta-2-adaptin) (Beta-adaptin) (Clathrin assembly protein complex 2 beta large chain) (Plasma membrane adaptor HA2/AP2 adaptin beta subunit)	Ap2b1 Clapb1	937	39	28.6939	0.0313337	28.7312	0.0290275	1.02625	0.0208372	>0.05
P62959	HINT1_RAT	Histidine triad nucleotide-binding protein 1 (EC 3.-.-.-) (17 kDa inhibitor of protein kinase C) (Adenosine 5'-monophosphoramidase) (Protein kinase C inhibitor 1) (Protein kinase C-interacting protein 1) (PKCI-1)	Hint1 Hint Pkci1	126	7	26.8775	0.0273479	26.9179	0.0289122	1.02841	0.020765	>0.05
P62963	PROF1_RAT	Profilin-1 (Profilin I)	Pfn1	140	5	26.4227	0.0295676	26.4056	0.0234413	0.988247	0.0161499	>0.05
P62966	RABP1_RAT	Cellular retinoic acid-binding protein 1 (Cellular retinoic acid-binding protein I) (CRABP-I)	Crabp1	137	3	20.2013	0.0733993	20.2964	0.073708	1.06813	0.0553124	>0.05
P62982	RS27A_RAT	Ubiquitin-40S ribosomal protein S27a (Ubiquitin carboxyl extension protein 80) [Cleaved into: Ubiquitin; 40S ribosomal protein S27a]	Rps27a Uba80 Ubcep1	156	3	26.2453	0.0311123	26.2595	0.0452258	1.00991	0.0315508	>0.05
P62994	GRB2_RAT	Growth factor receptor-bound protein 2 (Adapter protein GRB2) (Protein Ash) (SH2/SH3 adapter GRB2)	Grb2 Ash	217	5	23.1055	0.0251595	23.0731	0.0260757	0.97775	0.0176365	>0.05
P63004	LIS1_RAT	Platelet-activating factor acetylhydrolase IB subunit alpha (Lissencephaly-1 protein) (LIS-1) (PAF acetylhydrolase 45 kDa subunit) (PAF-AH 45 kDa subunit) (PAF-AH alpha) (PAFAH alpha)	Pafah1b1 Lis-1 Lis1 Pafaha	410	8	24.417	0.0336389	24.457	0.0261771	1.02809	0.0184275	>0.05
P63012	RAB3A_RAT	Ras-related protein Rab-3A	Rab3a	220	10	28.3342	0.0322854	28.4055	0.0330953	1.05064	0.0243302	>0.05
P63018	HSP7C_RAT	Heat shock cognate 71 kDa protein (Heat shock 70 kDa protein 8)	Hspa8 Hsc70 Hsc73	646	36	31.4839	0.0372125	31.5209	0.04124	1.02596	0.0297479	>0.05
P63036	DNJA1_RAT	DnaJ homolog subfamily A member 1 (DnaJ-like protein 1) (Heat shock protein J2) (HSJ-2)	Dnaja1 Hsj2 Rdj1	397	5	22.229	0.0821104	22.1752	0.0674319	0.96344	0.0411406	>0.05
P63039	CH60_RAT	60 kDa heat shock protein, mitochondrial (60 kDa chaperonin) (Chaperonin 60) (CPN60) (HSP-65) (Heat shock protein 60) (HSP-60) (Hsp60) (Mitochondrial matrix protein P1)	Hspd1 Hsp60	573	32	29.3601	0.0372738	29.3925	0.0327847	1.02274	0.0239197	>0.05
P63041	CPLX1_RAT	Complexin-1 (Complexin I) (CPX I) (Synaphin-2)	Cplx1	134	6	25.2361	0.0181285	25.2622	0.0187677	1.0183	0.0133239	>0.05
P63055	PCP4_RAT	Purkinje cell protein 4 (Brain-specific antigen PCP-4) (Brain-specific polypeptide PEP-19)	Pcp4 Pep19	62	5	27.521	0.0319839	27.513	0.0343343	0.99445	0.0231616	>0.05
P63086	MK01_RAT	Mitogen-activated protein kinase 1 (MAP kinase 1) (MAPK 1) (EC 2.7.11.24) (ERT1) (Extracellular signal-regulated kinase 2) (ERK-2) (MAP kinase isoform p42) (p42-MAPK) (Mitogen-activated protein kinase 2) (MAP kinase 2) (MAPK 2)	Mapk1 Erk2 Mapk Prkm1	358	16	26.8233	0.0210524	26.8135	0.0125042	0.993248	0.00860436	>0.05
P63100	CANB1_RAT	Calcineurin subunit B type 1 (Protein phosphatase 2B regulatory subunit 1) (Protein phosphatase 3 regulatory subunit B alpha isoform 1)	Ppp3r1 Cna2 Cnb	170	11	26.5771	0.0762658	26.6381	0.090568	1.04322	0.0707816	>0.05
P63102	1433Z_RAT	14-3-3 protein zeta/delta (Mitochondrial import stimulation factor S1 subunit) (Protein kinase C inhibitor protein 1) (KCIP-1)	Ywhaz Msfs1	245	18	31.6852	0.032545	31.7272	0.035204	1.02954	0.0250279	>0.05
P63142	KCNA2_RAT	Potassium voltage-gated channel subfamily A member 2 (RAK) (RBK2) (RCK5) (Voltage-gated potassium channel subunit Kv1.2)	Kcna2	499	4	21.4296	0.0462697	21.3854	0.0363414	0.969834	0.0246967	>0.05
P63245	GBLP_RAT	Guanine nucleotide-binding protein subunit beta-2-like 1 (Receptor for activated C kinase) (Receptor of activated protein kinase C 1) (RACK1) [Cleaved into: Guanine nucleotide-binding protein subunit beta-2-like 1, N-terminally processed]	Gnb2l1	317	4	23.1643	0.131273	23.2167	0.105392	1.03695	0.0956768	>0.05
P63319	KPCG_RAT	Protein kinase C gamma type (PKC-gamma) (EC 2.7.11.13)	Prkcg Pkcc Pkcg Prkcc	697	10	26.0737	0.026872	26.0894	0.0251393	1.01097	0.0178984	>0.05
P63322	RALA_RAT	Ras-related protein Ral-A	Rala Ral Ral-a	206	3	25.4803	0.0712858	25.373	0.116515	0.928374	0.0668703	>0.05
P63329	PP2BA_RAT	Serine/threonine-protein phosphatase 2B catalytic subunit alpha isoform (EC 3.1.3.16) (CAM-PRP catalytic subunit) (Calmodulin-dependent calcineurin A subunit alpha isoform)	Ppp3ca Calna	521	18	29.0925	0.0266531	29.1299	0.0236959	1.02623	0.016926	>0.05
P63331	PP2AA_RAT	Serine/threonine-protein phosphatase 2A catalytic subunit alpha isoform (PP2A-alpha) (EC 3.1.3.16)	Ppp2ca	309	11	25.3801	0.0650042	25.2589	0.0615224	0.919428	0.0390483	>0.05
P67779	PHB_RAT	Prohibitin	Phb	272	9	26.0028	0.0563217	25.8935	0.0707338	0.927	0.0448861	>0.05
P67874	CSK2B_RAT	Casein kinase II subunit beta (CK II beta) (Phosvitin)	Csnk2b Ck2n	215	4	22.5556	0.0484015	22.4939	0.0516347	0.958139	0.0333445	>0.05
P68101	IF2A_RAT	Eukaryotic translation initiation factor 2 subunit 1 (Eukaryotic translation initiation factor 2 subunit alpha) (eIF-2-alpha) (eIF-2A) (eIF-2alpha)	Eif2s1 Eif2a	315	3	21.4387	0.0721567	21.3912	0.0464723	0.967642	0.0315978	>0.05
P68136	ACTS_RAT	Actin, alpha skeletal muscle (Alpha-actin-1)	Acta1 Acta	377	19	31.9775	0.0179058	31.9412	0.0169575	0.975142	0.0114212	>0.05
P68182	KAPCB_RAT	cAMP-dependent protein kinase catalytic subunit beta (PKA C-beta) (EC 2.7.11.11)	Prkacb Pkacb	351	11	26.1339	0.0195737	26.1084	0.0291566	0.982481	0.019386	>0.05
P68255	1433T_RAT	14-3-3 protein theta (14-3-3 protein tau)	Ywhaq	245	18	30.2572	0.013948	30.2979	0.0168271	1.02863	0.0120782	>0.05
P68370	TBA1A_RAT	Tubulin alpha-1A chain (Alpha-tubulin 1) (Tubulin alpha-1 chain)	Tuba1a Tuba1	451	30	33.8657	0.00681833	33.8625	0.0089241	0.997766	0.0061166	>0.05
P68403	KPCB_RAT	Protein kinase C beta type (PKC-B) (PKC-beta) (EC 2.7.11.13)	Prkcb Pkcb Prkcb1	671	13	26.6333	0.01414	26.6333	0.0105741	1.00003	0.00743539	>0.05
P68511	1433F_RAT	14-3-3 protein eta	Ywhah	246	12	30.211	0.013652	30.2401	0.0200241	1.02038	0.0142017	>0.05
P69682	NECP1_RAT	Adaptin ear-binding coat-associated protein 1 (NECAP endocytosis-associated protein 1) (NECAP-1)	Necap1	277	4	25.0277	0.0399467	25.0586	0.0463575	1.0217	0.0341596	>0.05
P69897	TBB5_RAT	Tubulin beta-5 chain	Tubb5	444	42	33.3503	0.0151778	33.341	0.0193843	0.993584	0.0134177	>0.05
P70478	APC_RAT	Adenomatous polyposis coli protein (Protein APC)	Apc	2842	5	23.3897	0.0587643	23.4553	0.0595703	1.04653	0.0452231	>0.05
P70566	TMOD2_RAT	Tropomodulin-2 (Neuronal tropomodulin) (N-Tmod)	Tmod2 Ntmod	351	7	24.6862	0.0234916	24.726	0.0157261	1.02798	0.0113454	>0.05
P70567	TMOD1_RAT	Tropomodulin-1 (Erythrocyte tropomodulin) (E-Tmod)	Tmod1 Tmod	359	4	22.2833	0.109656	22.3312	0.14529	1.0338	0.109472	>0.05
P70580	PGRC1_RAT	Membrane-associated progesterone receptor component 1 (25-DX) (Acidic 25 kDa protein) (Ventral midline antigen) (VEMA)	Pgrmc1 25dx Lewi Pgrmc	195	5	24.6747	0.0214039	24.6841	0.0312559	1.00649	0.0214779	>0.05
P70600	FAK2_RAT	Protein-tyrosine kinase 2-beta (EC 2.7.10.2) (Calcium-dependent tyrosine kinase) (CADTK) (Calcium-regulated non-receptor proline-rich tyrosine kinase) (Cell adhesion kinase beta) (CAK-beta) (CAKB) (Focal adhesion kinase 2) (FADK 2) (Proline-rich tyrosine kinase 2)	Ptk2b Fak2 Pyk2	1009	3	21.1648	0.0239706	21.2025	0.0444564	1.02644	0.0336502	>0.05
P70645	BLMH_RAT	Bleomycin hydrolase (BH) (BLM hydrolase) (BMH) (EC 3.4.22.40)	Blmh	454	5	23.4137	0.08011	23.3545	0.0859435	0.959808	0.056367	>0.05
P81155	VDAC2_RAT	Voltage-dependent anion-selective channel protein 2 (VDAC-2) (B36-VDAC) (Outer mitochondrial membrane protein porin 2)	Vdac2	295	11	28.096	0.0291743	28.136	0.0382186	1.02813	0.0274102	>0.05
P82995	HS90A_RAT	Heat shock protein HSP 90-alpha (Heat shock 86 kDa) (HSP 86) (HSP86)	Hsp90aa1 Hsp86 Hspca	733	36	29.6288	0.013614	29.6212	0.0122342	0.994739	0.00841538	>0.05
P83941	ELOC_RAT	Transcription elongation factor B polypeptide 1 (Elongin 15 kDa subunit) (Elongin-C) (EloC) (RNA polymerase II transcription factor SIII subunit C) (SIII p15) (Stromal membrane-associated protein SMAP1B homolog)	Tceb1	112	2	21.7992	0.0268388	21.792	0.0380748	0.995044	0.0258667	>0.05
P84076	HPCA_RAT	Neuron-specific calcium-binding protein hippocalcin (P23K)	Hpca	193	11	27.8846	0.0216758	27.8571	0.0223136	0.981091	0.0154147	>0.05
P84082	ARF2_RAT	ADP-ribosylation factor 2	Arf2	181	11	28.3149	0.0105168	28.3118	0.018551	0.997836	0.0127177	>0.05
P84083	ARF5_RAT	ADP-ribosylation factor 5	Arf5	180	9	27.3842	0.0263887	27.391	0.0308199	1.00474	0.0216506	>0.05
P84087	CPLX2_RAT	Complexin-2 (Complexin II) (CPX II) (Synaphin-1)	Cplx2	134	6	27.4702	0.0248655	27.4984	0.0354296	1.0197	0.0250412	>0.05
P84092	AP2M1_RAT	AP-2 complex subunit mu (AP-2 mu chain) (Adaptor protein complex AP-2 subunit mu) (Adaptor-related protein complex 2 subunit mu) (Clathrin assembly protein complex 2 mu medium chain) (Clathrin coat assembly protein AP50) (Clathrin coat-associated protein AP50) (Mu2-adaptin) (Plasma membrane adaptor AP-2 50 kDa protein)	Ap2m1	435	13	26.3904	0.0427142	26.4167	0.0534527	1.01842	0.0383141	>0.05
P84817	FIS1_RAT	Mitochondrial fission 1 protein (FIS1 homolog) (rFis1) (Tetratricopeptide repeat protein 11) (TPR repeat protein 11)	Fis1 Ttc11	152	2	23.2318	0.0536164	23.2376	0.0678932	1.00402	0.0458837	>0.05
P85108	TBB2A_RAT	Tubulin beta-2A chain	Tubb2a	445	44	33.296	0.0132753	33.2952	0.0162178	0.999473	0.0112405	>0.05
P85515	ACTZ_RAT	Alpha-centractin (Centractin)	Actr1a Ctrn1	376	8	26.1045	0.049968	26.161	0.0943172	1.03989	0.0643758	>0.05
P85834	EFTU_RAT	Elongation factor Tu, mitochondrial	Tufm	452	14	26.8133	0.0355921	26.7094	0.0595162	0.930562	0.0392424	>0.05
P85845	FSCN1_RAT	Fascin	Fscn1	493	15	26.8818	0.0165815	26.8932	0.0159579	1.0079	0.0111351	>0.05
P85970	ARPC2_RAT	Actin-related protein 2/3 complex subunit 2 (Arp2/3 complex 34 kDa subunit) (p34-ARC)	Arpc2	300	10	24.3933	0.0383779	24.3902	0.0411915	0.997857	0.029837	>0.05
P85971	6PGL_RAT	6-phosphogluconolactonase (6PGL) (EC 3.1.1.31)	Pgls	257	5	22.0489	0.0403163	22.0152	0.0441602	0.976885	0.0282851	>0.05
P85972	VINC_RAT	Vinculin (Metavinculin)	Vcl	1066	5	21.1032	0.0669862	21.1209	0.0924342	1.01232	0.0693446	>0.05
P85973	PNPH_RAT	Purine nucleoside phosphorylase (PNP) (EC 2.4.2.1) (Inosine phosphorylase) (Inosine-guanosine phosphorylase)	Pnp Np	289	9	23.9487	0.0835275	24.0035	0.111019	1.03873	0.0757946	>0.05
P97532	THTM_RAT	3-mercaptopyruvate sulfurtransferase (MST) (EC 2.8.1.2)	Mpst	297	4	21.748	0.0255008	21.7295	0.0199477	0.987209	0.0134458	>0.05
P97536	CAND1_RAT	Cullin-associated NEDD8-dissociated protein 1 (Cullin-associated and neddylation-dissociated protein 1) (TBP-interacting protein of 120 kDa A) (TBP-interacting protein 120A) (p120 CAND1)	Cand1 Tip120 Tip120a	1230	21	25.8	0.0201116	25.8188	0.0162344	1.01315	0.0112965	>0.05
P97546	NPTN_RAT	Neuroplastin (Glycoprotein 55/65) (gp55/65) (Stromal cell-derived receptor 1) (SDR-1)	Nptn Sdfr1 Sdr1	393	9	26.2503	0.0226162	26.2471	0.0240693	0.997781	0.0165948	>0.05
P97576	GRPE1_RAT	GrpE protein homolog 1, mitochondrial (Mt-GrpE#1)	Grpel1 Grepel1	217	3	22.6509	0.0243554	22.6737	0.0241805	1.0159	0.0173583	>0.05
P97612	FAAH1_RAT	Fatty-acid amide hydrolase 1 (EC 3.5.1.99) (Anandamide amidohydrolase 1) (Oleamide hydrolase 1)	Faah Faah1	579	3	19.8702	0.0860011	19.9757	0.0555181	1.07588	0.0392489	>0.05
P97685	NFASC_RAT	Neurofascin	Nfasc	1240	17	25.9845	0.0154659	25.9702	0.0281006	0.990097	0.019559	>0.05
P97686	NRCAM_RAT	Neuronal cell adhesion molecule (Nr-CAM) (Ankyrin-binding cell adhesion molecule NrCAM) (Neuronal surface protein Bravo) (rBravo) (NgCAM-related cell adhesion molecule) (Ng-CAM-related)	Nrcam	1214	15	24.759	0.0206089	24.7736	0.0284942	1.01019	0.0198114	>0.05
P97700	M2OM_RAT	Mitochondrial 2-oxoglutarate/malate carrier protein (OGCP) (Solute carrier family 25 member 11)	Slc25a11 Slc20a4	314	10	26.6929	0.0240294	26.7208	0.0436434	1.01953	0.030514	>0.05
P97710	SHPS1_RAT	Tyrosine-protein phosphatase non-receptor type substrate 1 (SHP substrate 1) (SHPS-1) (Brain Ig-like molecule with tyrosine-based activation motifs) (Bit) (CD172 antigen-like family member A) (Inhibitory receptor SHPS-1) (Macrophage fusion receptor) (Macrophage membrane protein MFP150) (Signal-regulatory protein alpha-1) (Sirp-alpha-1) (CD antigen CD172a)	Sirpa Bit Mfr Ptpns1 Shps1 Sirp	509	10	26.1557	0.0121019	26.1746	0.0131478	1.01323	0.00925299	>0.05
P97829	CD47_RAT	Leukocyte surface antigen CD47 (Integrin-associated protein) (IAP) (CD antigen CD47)	Cd47	303	5	24.3948	0.0402733	24.4161	0.0448653	1.01493	0.0326315	>0.05
P97837	DLGP2_RAT	Disks large-associated protein 2 (DAP-2) (PSD-95/SAP90-binding protein 2) (SAP90/PSD-95-associated protein 2) (SAPAP2)	Dlgap2 Dap2	1059	3	19.3968	0.164412	19.3793	0.0813941	0.987971	0.058255	>0.05
P97839	DLGP4_RAT	Disks large-associated protein 4 (DAP-4) (PSD-95/SAP90-binding protein 4) (SAP90/PSD-95-associated protein 4) (SAPAP-4)	Dlgap4 Dap4 Sapap4	992	4	21.6697	0.0468528	21.6204	0.0726096	0.966434	0.0453274	>0.05
P97846	CNTP1_RAT	Contactin-associated protein 1 (Caspr) (Caspr1) (Neurexin IV) (Neurexin-4) (Paranodin) (p190)	Cntnap1 Caspr Nrxn4	1381	9	22.8259	0.0205377	22.8473	0.0253627	1.01495	0.0182827	>0.05
Q00566	MECP2_RAT	Methyl-CpG-binding protein 2 (MeCp-2 protein) (MeCp2)	Mecp2	492	4	21.4483	0.0279672	21.5123	0.0464475	1.04535	0.032928	>0.05
Q00981	UCHL1_RAT	Ubiquitin carboxyl-terminal hydrolase isozyme L1 (UCH-L1) (EC 3.4.19.12) (EC 6.-.-.-) (Neuron cytoplasmic protein 9.5) (PGP 9.5) (PGP9.5) (Ubiquitin thioesterase L1)	Uchl1	223	17	30.3976	0.0348321	30.409	0.040412	1.00798	0.0278811	>0.05
Q01062	PDE2A_RAT	cGMP-dependent 3',5'-cyclic phosphodiesterase (EC 3.1.4.17) (Cyclic GMP-stimulated phosphodiesterase) (CGS-PDE) (cGSPDE)	Pde2a	928	15	25.072	0.0500105	25.0626	0.0512085	0.993501	0.0362083	>0.05
Q01066	PDE1B_RAT	Calcium/calmodulin-dependent 3',5'-cyclic nucleotide phosphodiesterase 1B (Cam-PDE 1B) (EC 3.1.4.17) (63 kDa Cam-PDE)	Pde1b Pde1b1	535	19	26.3204	0.0247149	26.322	0.0308297	1.00112	0.0206679	>0.05
Q01728	NAC1_RAT	Sodium/calcium exchanger 1 (Na(+)/Ca(2+)-exchange protein 1) (Solute carrier family 8 member 1)	Slc8a1 Ncx1	971	4	21.7337	0.0548189	21.6876	0.053165	0.968501	0.0344712	>0.05
Q01986	MP2K1_RAT	Dual specificity mitogen-activated protein kinase kinase 1 (MAP kinase kinase 1) (MAPKK 1) (EC 2.7.12.2) (ERK activator kinase 1) (MAPK/ERK kinase 1) (MEK 1)	Map2k1 Mek1 Prkmk1	393	15	26.7983	0.0302381	26.7971	0.0312117	0.999137	0.021695	>0.05
Q02563	SV2A_RAT	Synaptic vesicle glycoprotein 2A (Synaptic vesicle protein 2) (Synaptic vesicle protein 2A)	Sv2a Sv2	742	8	25.735	0.0441844	25.7236	0.0555992	0.992095	0.0394903	>0.05
Q02874	H2AY_RAT	Core histone macro-H2A.1 (Histone macroH2A1) (mH2A1) (H2A.y) (H2A/y)	H2afy	371	6	24.0228	0.114217	24.1613	0.13674	1.1008	0.114194	>0.05
Q03114	CDK5_RAT	Cyclin-dependent-like kinase 5 (EC 2.7.11.1) (Cell division protein kinase 5) (Serine/threonine-protein kinase PSSALRE) (Tau protein kinase II catalytic subunit) (TPKII catalytic subunit)	Cdk5 Cdkn5	292	6	22.0511	0.0508912	21.9616	0.0446159	0.93985	0.0298269	>0.05
Q03555	GEPH_RAT	Gephyrin (Putative glycine receptor-tubulin linker protein) [Includes: Molybdopterin adenylyltransferase (MPT adenylyltransferase) (EC 2.7.7.75) (Domain G); Molybdopterin molybdenumtransferase (MPT Mo-transferase) (EC 2.10.1.1) (Domain E)]	Gphn Gph	768	11	23.9297	0.0223113	23.8672	0.0419061	0.9576	0.0287873	>0.05
Q04462	SYVC_RAT	Valine--tRNA ligase (EC 6.1.1.9) (Valyl-tRNA synthetase) (ValRS)	Vars Vars2	1264	6	23.1453	0.0608826	23.2618	0.0461357	1.08406	0.0346856	>0.05
Q05175	BASP1_RAT	Brain acid soluble protein 1 (22 kDa neuronal tissue-enriched acidic protein) (Neuronal axonal membrane protein NAP-22)	Basp1 Nap22	220	13	31.0532	0.0307994	31.0715	0.0435841	1.01276	0.030458	>0.05
Q05683	DCE2_RAT	Glutamate decarboxylase 2 (EC 4.1.1.15) (65 kDa glutamic acid decarboxylase) (GAD-65) (Glutamate decarboxylase 65 kDa isoform)	Gad2 Gad65	585	6	24.2005	0.102393	24.0575	0.098729	0.905659	0.0588089	>0.05
Q05764	ADDB_RAT	Beta-adducin (Adducin-63) (Erythrocyte adducin subunit beta)	Add2	725	17	26.0556	0.0199635	26.0762	0.0223504	1.01436	0.0157254	>0.05
Q05962	ADT1_RAT	ADP/ATP translocase 1 (ADP,ATP carrier protein 1) (Adenine nucleotide translocator 1) (ANT 1) (Solute carrier family 25 member 4)	Slc25a4 Ant1	298	17	28.9514	0.0438413	28.8887	0.0472466	0.95747	0.0314465	>0.05
Q05982	NDKA_RAT	Nucleoside diphosphate kinase A (NDK A) (NDP kinase A) (EC 2.7.4.6) (Metastasis inhibition factor NM23) (Tumor metastatic process-associated protein)	Nme1	152	13	28.5999	0.0510711	28.6396	0.0555411	1.02794	0.0386906	>0.05
Q06647	ATPO_RAT	ATP synthase subunit O, mitochondrial (Oligomycin sensitivity conferral protein) (OSCP) (Sperm flagella protein 4)	Atp5o	213	11	28.8004	0.0415725	28.7742	0.0558597	0.981994	0.0384549	>0.05
Q06QA1	Q06QA1_RAT	NADH-ubiquinone oxidoreductase chain 5 (EC 1.6.5.3)	ND5	609	2	20.6572	0.0484	20.7775	0.0779636	1.08693	0.0693405	>0.05
Q07009	CAN2_RAT	Calpain-2 catalytic subunit (EC 3.4.22.53) (Calcium-activated neutral proteinase 2) (CANP 2) (Calpain M-type) (Calpain-2 large subunit) (Millimolar-calpain) (M-calpain)	Capn2	700	6	22.9458	0.0499473	22.9599	0.0502454	1.00981	0.0330935	>0.05
Q07266	DREB_RAT	Drebrin (Developmentally-regulated brain protein)	Dbn1	707	9	26.7205	0.0224084	26.6848	0.0278828	0.975517	0.0188102	>0.05
Q07310	NRX3A_RAT	Neurexin-3 (Neurexin III-alpha) (Neurexin-3-alpha)	Nrxn3	1578	3	23.2504	0.0739311	23.1845	0.065086	0.955361	0.0443573	>0.05
Q07647	GTR3_RAT	Solute carrier family 2, facilitated glucose transporter member 3 (Glucose transporter type 3, brain) (GLUT-3)	Slc2a3 Glut-3 Glut3	493	7	24.8012	0.0442932	24.8418	0.0415464	1.02858	0.0298022	>0.05
Q08163	CAP1_RAT	Adenylyl cyclase-associated protein 1 (CAP 1)	Cap1 Cap Mch1	474	19	28.211	0.0307586	28.2805	0.0155607	1.04936	0.0113205	>0.05
Q08406	CNTFR_RAT	Ciliary neurotrophic factor receptor subunit alpha (CNTF receptor subunit alpha) (CNTFR-alpha)	Cntfr	372	2	20.9404	0.0544761	20.8221	0.0738166	0.921263	0.0450984	>0.05
Q08602	PGTA_RAT	Geranylgeranyl transferase type-2 subunit alpha (EC 2.5.1.60) (Geranylgeranyl transferase type II subunit alpha) (Rab geranyl-geranyltransferase subunit alpha) (Rab GG transferase alpha) (Rab GGTase alpha) (Rab geranylgeranyltransferase subunit alpha)	Rabggta Ggta	567	3	20.3131	0.0625868	20.357	0.0584806	1.03086	0.0419976	>0.05
Q08877	DYN3_RAT	Dynamin-3 (EC 3.6.5.5) (Dynamin, testicular) (T-dynamin)	Dnm3 Dyn3	869	14	27.4582	0.0314785	27.4123	0.0281992	0.968693	0.0187151	>0.05
Q09073	ADT2_RAT	ADP/ATP translocase 2 (ADP,ATP carrier protein 2) (Adenine nucleotide translocator 2) (ANT 2) (Solute carrier family 25 member 5) [Cleaved into: ADP/ATP translocase 2, N-terminally processed]	Slc25a5 Ant2	298	17	28.8942	0.0405377	28.8367	0.0322068	0.960919	0.0214432	>0.05
Q0VGJ9	Q0VGJ9_RAT	Receptor expression-enhancing protein	Reep2 LOC682105	254	2	22.4654	0.054502	22.539	0.043971	1.05238	0.0323249	>0.05
Q0VGK4	GDPD1_RAT	Glycerophosphodiester phosphodiesterase domain-containing protein 1 (EC 3.1.-.-)	Gdpd1	314	4	21.1927	0.0731878	21.2536	0.0659388	1.04312	0.0479304	>0.05
Q0ZFS8	Q0ZFS8_RAT	Protein Srsf3 (RCG61099, isoform CRA_c)	Srsf3 LOC100910660 Sfrs3 Sfrs3_predicted rCG_61099	164	3	23.0125	0.0297574	22.9432	0.0407874	0.953146	0.0254051	>0.05
Q157S1	CRTC1_RAT	CREB-regulated transcription coactivator 1 (Mucoepidermoid carcinoma translocated protein 1 homolog) (Transducer of regulated cAMP response element-binding protein 1) (TORC-1) (Transducer of CREB protein 1)	Crtc1 Mect1 Torc1	630	2	20.3531	0.0593762	20.3167	0.0946299	0.97506	0.0611387	>0.05
Q1HCL7	NAKD2_RAT	NAD kinase 2, mitochondrial (EC 2.7.1.23) (Mitochondrial NAD kinase) (NAD kinase domain-containing protein 1, mitochondrial)	Nadk2 Mnadk Nadkd1	425	2	23.2698	0.0573699	23.3273	0.0879032	1.04072	0.0630119	>0.05
Q1RP74	Q1RP74_RAT	Protein LOC100911774 (RCG53953, isoform CRA_a) (Tubulin folding cofactor B) (ZH14 protein)	LOC100911774 Ckap1_predicted Tbcb ZH14 rCG_53953	244	6	23.8733	0.0413429	23.8382	0.0573993	0.975981	0.0409585	>0.05
Q1WIM1	CADM4_RAT	Cell adhesion molecule 4 (Immunoglobulin superfamily member 4C) (IgSF4C) (Nectin-like protein 4) (NECL-4)	Cadm4 Igsf4c Necl4	388	7	23.7004	0.0443501	23.7088	0.032538	1.00585	0.0229728	>0.05
Q1WIM2	CADM2_RAT	Cell adhesion molecule 2 (Immunoglobulin superfamily member 4D) (IgSF4D) (Nectin-like protein 3) (NECL-3) (Synaptic cell adhesion molecule 2) (SynCAM 2)	Cadm2 Igsf4d Necl3	435	8	25.63	0.0348479	25.6512	0.0347513	1.01486	0.0235243	>0.05
Q1WIM3	CADM3_RAT	Cell adhesion molecule 3 (Immunoglobulin superfamily member 4B) (IgSF4B) (Nectin-like protein 1) (NECL-1)	Cadm3 Igsf4b Necl1	396	6	24.4652	0.0719974	24.545	0.0581721	1.05689	0.0438245	>0.05
Q2I6B2	Q2I6B2_RAT	V-type proton ATPase subunit a	Atp6v0a1	832	23	28.0617	0.012885	28.0674	0.013222	1.00398	0.00917538	>0.05
Q2IBD4	CTTB2_RAT	Cortactin-binding protein 2 (CortBP2)	Cttnbp2	1649	5	23.2063	0.0376895	23.2417	0.059893	1.02481	0.0424109	>0.05
Q2TA68	OPA1_RAT	Dynamin-like 120 kDa protein, mitochondrial (EC 3.6.5.5) (Optic atrophy protein 1 homolog) [Cleaved into: Dynamin-like 120 kDa protein, form S1]	Opa1	960	17	24.6258	0.0228622	24.6542	0.0237343	1.01989	0.0169322	>0.05
Q32Q06	AP1M1_RAT	AP-1 complex subunit mu-1 (AP-mu chain family member mu1A) (Adaptor protein complex AP-1 subunit mu-1) (Adaptor-related protein complex 1 subunit mu-1) (Clathrin assembly protein complex 1 mu-1 medium chain 1) (Golgi adaptor HA1/AP1 adaptin mu-1 subunit) (Mu-adaptin 1) (Mu1A-adaptin)	Ap1m1	423	3	21.2174	0.0845969	21.3569	0.0398593	1.10154	0.0297747	>0.05
Q3B7U9	FKBP8_RAT	Peptidyl-prolyl cis-trans isomerase FKBP8 (PPIase FKBP8) (EC 5.2.1.8) (FK506-binding protein 8) (FKBP-8) (Rotamase)	Fkbp8	403	3	20.9368	0.0970214	21.0193	0.0814667	1.05884	0.0590118	>0.05
Q3KR72	Q3KR72_RAT	Actin-binding LIM protein 1	Ablim1 Ablim1_predicted	427	4	20.2681	0.0693246	20.3092	0.0779839	1.02892	0.0573436	>0.05
Q3KR86	MIC60_RAT	MICOS complex subunit Mic60 (Mitochondrial inner membrane protein) (Mitofilin) (Fragment)	Immt Mic60	609	21	27.2363	0.0290831	27.2578	0.0314466	1.015	0.0222323	>0.05
Q3KRD5	TOM34_RAT	Mitochondrial import receptor subunit TOM34 (Translocase of outer membrane 34 kDa subunit)	Tomm34	309	2	21.3786	0.0525272	21.3309	0.0598219	0.967518	0.0398601	>0.05
Q3KRE0	ATAD3_RAT	ATPase family AAA domain-containing protein 3	Atad3 Atad3a	591	3	20.9598	0.0574963	21.0509	0.0339152	1.06518	0.0256061	>0.05
Q3MHS9	Q3MHS9_RAT	Chaperonin containing Tcp1, subunit 6A (Zeta 1) (Chaperonin subunit 6a (Zeta)) (Protein Cct6a)	Cct6a rCG_21714	531	11	25.0984	0.0225613	25.1195	0.0306323	1.01477	0.0224404	>0.05
Q3MIE4	VAT1_RAT	Synaptic vesicle membrane protein VAT-1 homolog (EC 1.-.-.-) (Mitofusin-binding protein) (Protein MIB)	Vat1	404	9	23.0406	0.028931	23.017	0.0263396	0.983773	0.0180013	>0.05
Q3SWU3	HNRDL_RAT	Heterogeneous nuclear ribonucleoprotein D-like (hnRNP D-like) (hnRNP DL)	Hnrnpdl Hnrpdl	322	3	23.4724	0.0330521	23.4907	0.0538029	1.01279	0.0408687	>0.05
Q3T1J1	IF5A1_RAT	Eukaryotic translation initiation factor 5A-1 (eIF-5A-1) (eIF-5A1) (Eukaryotic initiation factor 5A isoform 1) (eIF-5A) (eIF-4D)	Eif5a	154	3	23.5335	0.0475831	23.5579	0.0205641	1.01705	0.0148684	>0.05
Q3T1K5	CAZA2_RAT	F-actin-capping protein subunit alpha-2 (CapZ alpha-2)	Capza2	286	7	25.4502	0.0252914	25.4538	0.0176349	1.0025	0.0120908	>0.05
Q3ZAU6	Q3ZAU6_RAT	Protein Rnf14 (RCG49400, isoform CRA_a) (Rnf14 protein)	Rnf14 rCG_49400	479	3	21.5002	0.0666694	21.5425	0.0857431	1.02971	0.0620083	>0.05
Q3ZB98	BCAS1_RAT	Breast carcinoma-amplified sequence 1 homolog (Protein whose mRNA is enriched in synaptosomes 2) (Pmes-2) (Fragment)	Bcas1	555	11	24.6333	0.0411906	24.6339	0.0466888	1.00046	0.0325559	>0.05
Q3ZBA0	TCPR1_RAT	Tectonin beta-propeller repeat-containing protein 1	Tecpr1	1166	2	19.2107	0.19339	19.4716	0.088329	1.19828	0.0714637	>0.05
Q497B0	NIT2_RAT	Omega-amidase NIT2 (EC 3.5.1.3) (Nitrilase homolog 2)	Nit2	276	2	21.7497	0.046828	21.7261	0.0529084	0.983796	0.0379101	>0.05
Q499N5	ACSF2_RAT	Acyl-CoA synthetase family member 2, mitochondrial (EC 6.2.1.-)	Acsf2	615	3	22.727	0.0686155	22.7239	0.0938322	0.997859	0.0640289	>0.05
Q499R7	Q499R7_RAT	Ppa1 protein (Fragment)	Ppa1 Pyp	331	8	23.9167	0.041743	23.9302	0.0304962	1.00938	0.021993	>0.05
Q4FZT0	STML2_RAT	Stomatin-like protein 2, mitochondrial (SLP-2)	Stoml2	353	5	22.6811	0.0350394	22.6926	0.0238034	1.00803	0.01676	>0.05
Q4FZT2	PPME1_RAT	Protein phosphatase methylesterase 1 (PME-1) (EC 3.1.1.89)	Ppme1 Pme1	386	4	21.4031	0.0302954	21.4877	0.0359582	1.06033	0.026307	>0.05
Q4FZT9	PSMD2_RAT	26S proteasome non-ATPase regulatory subunit 2	Psmd2	908	4	22.5562	0.0553645	22.5596	0.0431428	1.00233	0.0294276	>0.05
Q4FZY0	EFHD2_RAT	EF-hand domain-containing protein D2 (Swiprosin-1)	Efhd2 Sws1	239	6	23.1993	0.052523	23.1141	0.0356911	0.942638	0.0236995	>0.05
Q4KM45	CT027_RAT	UPF0687 protein C20orf27 homolog	0	174	2	20.9749	0.0610004	20.9958	0.0558592	1.01458	0.0383685	>0.05
Q4KM49	SYYC_RAT	Tyrosine--tRNA ligase, cytoplasmic (EC 6.1.1.1) (Tyrosyl-tRNA synthetase) (TyrRS) [Cleaved into: Tyrosine--tRNA ligase, cytoplasmic, N-terminally processed]	Yars	528	5	21.798	0.0826033	21.9282	0.0760323	1.09441	0.0590676	>0.05
Q4KM73	KCY_RAT	UMP-CMP kinase (EC 2.7.4.14) (Deoxycytidylate kinase) (CK) (dCMP kinase) (Nucleoside-diphosphate kinase) (EC 2.7.4.6) (Uridine monophosphate/cytidine monophosphate kinase) (UMP/CMP kinase) (UMP/CMPK)	Cmpk1 Cmpk	196	6	23.969	0.0289999	24.0052	0.0218826	1.02541	0.0158361	>0.05
Q4KM74	SC22B_RAT	Vesicle-trafficking protein SEC22b (ER-Golgi SNARE of 24 kDa) (ERS-24) (ERS24) (SEC22 vesicle-trafficking protein homolog B) (SEC22 vesicle-trafficking protein-like 1)	Sec22b Sec22l1	215	3	20.6515	0.0595351	20.6488	0.0493011	0.998195	0.0351064	>0.05
Q4KMA2	RD23B_RAT	UV excision repair protein RAD23 homolog B	Rad23b	415	4	22.3997	0.0315846	22.4148	0.0359441	1.01058	0.02569	>0.05
Q4KSH6	Q4KSH6_RAT	Dual specificity mitogen-activated protein kinase kinase 4	Map2k4	397	6	22.6348	0.0529369	22.6716	0.0740224	1.02582	0.0545045	>0.05
Q4QQS3	OSCP1_RAT	Protein OSCP1	Oscp1	379	3	19.6503	0.0600378	19.6681	0.0703476	1.01238	0.0465812	>0.05
Q4QQV3	F162A_RAT	Protein FAM162A (E2-induced gene 5 protein homolog)	Fam162a E2ig5	155	2	21.8455	0.034318	21.8731	0.0648689	1.01928	0.0486199	>0.05
Q4QQV8	CHMP5_RAT	Charged multivesicular body protein 5 (Chromatin-modifying protein 5)	Chmp5	219	2	22.0958	0.0252291	22.0588	0.0398188	0.974669	0.0271547	>0.05
Q4QRB4	TBB3_RAT	Tubulin beta-3 chain (Neuron-specific class III beta-tubulin)	Tubb3	450	37	33.0182	0.0131182	33.0106	0.0220127	0.994736	0.0151764	>0.05
Q4R1A4	Q4R1A4_RAT	TRK-fused gene protein	LOC102546978 TFG	282	2	17.7548	0.151408	17.8453	0.0968978	1.06474	0.0783243	>0.05
Q4V7C7	ARP3_RAT	Actin-related protein 3 (Actin-like protein 3)	Actr3 Arp3	418	12	26.7542	0.0401724	26.8184	0.0395434	1.04549	0.0288866	>0.05
Q4V7D2	ROGDI_RAT	Protein rogdi homolog	Rogdi	287	2	25.0977	0.0963358	25.026	0.101168	0.951477	0.0655837	>0.05
Q4V898	RBMX_RAT	RNA-binding motif protein, X chromosome (Heterogeneous nuclear ribonucleoprotein G) (hnRNP G) (RNA-binding motif protein, X chromosome retrogene) (RNA-binding motif protein, X chromosome retrogene-like) [Cleaved into: RNA-binding motif protein, X chromosome, N-terminally processed]	Rbmx Rbmxrt	390	4	22.8974	0.0478175	22.9381	0.0410564	1.02861	0.0289459	>0.05
Q4V8H5	Q4V8H5_RAT	Aspartyl aminopeptidase (Aspartyl aminopeptidase, isoform CRA_c) (Protein Dnpep)	Dnpep rCG_23931	475	8	22.4914	0.092385	22.5448	0.0934872	1.03773	0.0717456	>0.05
Q4V8I9	Q4V8I9_RAT	Protein Ugp2 (UDP-glucose pyrophosphorylase 2) (UDP-glucose pyrophosphorylase 2, isoform CRA_b)	Ugp2 rCG_23243	508	6	21.484	0.0503087	21.4998	0.0340903	1.01103	0.0239032	>0.05
Q505I9	Q505I9_RAT	Epsin 2 (Epsin-2)	Epn2	640	4	21.6052	0.0479883	21.6555	0.0439532	1.03551	0.0308648	>0.05
Q505J2	Q505J2_RAT	Acetylcholinesterase	Ache rCG_21937	614	4	21.8577	0.0304866	21.8845	0.0423206	1.0187	0.0304324	>0.05
Q52KS1	Q52KS1_RAT	6-phosphofructokinase (EC 2.7.1.11) (Phosphohexokinase)	Pfkm Pfk-M rCG_50717	780	20	26.6873	0.024039	26.6998	0.0304725	1.00869	0.0215515	>0.05
Q561S0	NDUAA_RAT	NADH dehydrogenase [ubiquinone] 1 alpha subcomplex subunit 10, mitochondrial (Complex I-42kD) (CI-42kD) (NADH-ubiquinone oxidoreductase 42 kDa subunit)	Ndufa10	355	11	27.0783	0.0406536	27.1336	0.0500776	1.03908	0.03476	>0.05
Q566C7	NUDT3_RAT	Diphosphoinositol polyphosphate phosphohydrolase 1 (DIPP-1) (EC 3.6.1.52) (Diadenosine 5',5'''-P1,P6-hexaphosphate hydrolase 1) (EC 3.6.1.-) (Nucleoside diphosphate-linked moiety X motif 3) (Nudix motif 3)	Nudt3 Dipp Dipp1	168	2	21.1778	0.0284187	21.1758	0.0410785	0.998645	0.029098	>0.05
Q568Z9	PHYIP_RAT	Phytanoyl-CoA hydroxylase-interacting protein (Phytanoyl-CoA hydroxylase-associated protein 1) (PAHX-AP1) (PAHXAP1)	Phyhip	330	7	23.6341	0.0259802	23.7114	0.0442744	1.05502	0.0340607	>0.05
Q56A26	Q56A26_RAT	Oligodendrocytic myelin paranodal and inner loop protein (Protein Opalin)	Opalin	142	2	24.0672	0.0415864	24.0716	0.045304	1.00305	0.0318501	>0.05
Q5BJT9	Q5BJT9_RAT	Creatine kinase, mitochondrial 1, ubiquitous (Protein Ckmt1b)	Ckmt1b Ckmt1	418	21	29.9789	0.0204022	29.9631	0.0223246	0.989087	0.0154031	>0.05
Q5BJU7	WASF1_RAT	Wiskott-Aldrich syndrome protein family member 1 (WASP family protein member 1) (Protein WAVE-1)	Wasf1 Wave1	559	13	24.6751	0.0215625	24.6207	0.0338393	0.962958	0.0225937	>0.05
Q5BJZ3	Q5BJZ3_RAT	Nicotinamide nucleotide transhydrogenase (Protein Nnt)	Nnt	1086	3	21.1125	0.0644878	21.2644	0.0621913	1.11097	0.0481177	>0.05
Q5BK33	Q5BK33_RAT	p55 protein	LOC652956	467	3	20.0473	0.0791533	20.187	0.0773	1.10169	0.0597883	>0.05
Q5BK63	NDUA9_RAT	NADH dehydrogenase [ubiquinone] 1 alpha subcomplex subunit 9, mitochondrial (Complex I-39kD) (CI-39kD) (NADH-ubiquinone oxidoreductase 39 kDa subunit) (Sperm flagella protein 3)	Ndufa9	377	12	26.0997	0.0297947	26.1635	0.0257321	1.04524	0.0186996	>0.05
Q5BKC9	NGEF_RAT	Ephexin-1 (Eph-interacting exchange protein) (Neuronal guanine nucleotide exchange factor)	Ngef	701	10	24.0358	0.0351605	24.0271	0.037146	0.993999	0.0256737	>0.05
Q5D059	Q5D059_RAT	Hnrpk protein (Protein LOC100363335)	Hnrpk Hnrnpk LOC100359916 LOC100363335	464	15	27.5594	0.0210345	27.561	0.0204468	1.0011	0.0138059	>0.05
Q5EBA0	ERAL1_RAT	GTPase Era, mitochondrial (ERA-like protein 1)	Eral1	437	2	20.5848	0.102732	20.6841	0.0930849	1.07127	0.0715587	>0.05
Q5FVC2	ARHG2_RAT	Rho guanine nucleotide exchange factor 2 (Guanine nucleotide exchange factor H1) (GEF-H1)	Arhgef2	985	4	21.6756	0.0434991	21.7734	0.0378456	1.07008	0.0295805	>0.05
Q5FVG4	Q5FVG4_RAT	Protein LOC100911440 (Solute carrier family 25 (Mitochondrial carrier, glutamate), member 22)	LOC100911440 Slc25a22	229	7	24.7531	0.0723217	24.836	0.0548532	1.05911	0.0398301	>0.05
Q5FVH8	R7BP_RAT	Regulator of G-protein signaling 7-binding protein (R7 family-binding protein)	Rgs7bp R7bp	257	2	20.0953	0.0739233	20.0147	0.0871258	0.94564	0.0574632	>0.05
Q5FVI4	CEND_RAT	Cell cycle exit and neuronal differentiation protein 1	Cend1	149	3	24.1595	0.05957	24.0742	0.0610263	0.942598	0.0378491	>0.05
Q5FVI6	VATC1_RAT	V-type proton ATPase subunit C 1 (V-ATPase subunit C 1) (Vacuolar proton pump subunit C 1)	Atp6v1c1	382	8	25.4047	0.0265644	25.411	0.0249958	1.00435	0.0179669	>0.05
Q5FVJ0	RUFY3_RAT	Protein RUFY3 (Rap2-interacting protein x) (RIPx) (Single axon-regulated protein) (Singar)	Rufy3 Ripx	469	11	23.9097	0.0245658	23.9078	0.0283472	0.998657	0.0196496	>0.05
Q5FVM4	NONO_RAT	Non-POU domain-containing octamer-binding protein (NonO protein)	Nono	476	2	20.2859	0.185378	19.9218	0.216117	0.77694	0.116099	>0.05
Q5GFD9	IMPCT_RAT	Protein IMPACT (Imprinted and ancient gene protein homolog)	Impact	317	9	25.6871	0.0376907	25.6268	0.0314802	0.959063	0.0210714	>0.05
Q5HZV9	PP1R7_RAT	Protein phosphatase 1 regulatory subunit 7 (Protein phosphatase 1 regulatory subunit 22)	Ppp1r7 Sds22	360	9	25.369	0.0204635	25.3948	0.0171236	1.01806	0.0118986	>0.05
Q5I0D1	GLOD4_RAT	Glyoxalase domain-containing protein 4	Glod4	298	3	23.3426	0.0239759	23.3156	0.0395924	0.981493	0.0282741	>0.05
Q5I0G4	SYG_RAT	Glycine--tRNA ligase (EC 6.1.1.14) (Diadenosine tetraphosphate synthetase) (AP-4-A synthetase) (Glycyl-tRNA synthetase) (GlyRS) (Fragment)	Gars	637	6	21.6141	0.0415603	21.56	0.044344	0.963176	0.030185	>0.05
Q5M7A7	CNRP1_RAT	CB1 cannabinoid receptor-interacting protein 1 (CRIP-1)	Cnrip1	164	3	25.8603	0.0172985	25.8325	0.021474	0.980926	0.0146623	>0.05
Q5M7T6	Q5M7T6_RAT	ATPase, H+ transporting, lysosomal 38kDa, V0 subunit d1 (Protein Atp6v0d1) (RCG51062, isoform CRA_a)	Atp6v0d1 rCG_51062	351	14	27.7794	0.030296	27.8388	0.0330174	1.04205	0.0238301	>0.05
Q5M7U6	ARP2_RAT	Actin-related protein 2 (Actin-like protein 2)	Actr2 Arp2	394	10	25.2135	0.0191053	25.1859	0.0237869	0.9811	0.0159148	>0.05
Q5M7W5	MAP4_RAT	Microtubule-associated protein 4 (MAP-4)	Map4	1057	15	24.716	0.0352725	24.7431	0.0478951	1.01898	0.0338796	>0.05
Q5M964	Q5M964_RAT	Fumarate hydratase 1 (Fumarate hydratase, mitochondrial)	Fh Fh1 rCG_20230	507	11	25.6972	0.0316948	25.7714	0.0208819	1.0528	0.0151393	>0.05
Q5M9F7	Q5M9F7_RAT	ARP10 actin-related protein 10 homolog (S. cerevisiae) (Actin-related protein 10 homolog (S. cerevisiae)) (Protein Actr10)	Actr10 rCG_61978	417	3	21.9445	0.0382435	22.0237	0.0407345	1.05646	0.0298428	>0.05
Q5M9H4	Q5M9H4_RAT	ATPase, Na+/K+ transporting, beta 2 polypeptide (Sodium/potassium-transporting ATPase subunit beta-2)	Atp1b2	290	5	25.9411	0.0788502	26.0101	0.0439211	1.04893	0.0313518	>0.05
Q5M9H7	Q5M9H7_RAT	DnaJ (Hsp40) homolog, subfamily A, member 2 (DnaJ (Hsp40) homolog, subfamily A, member 2, isoform CRA_b) (DnaJ homolog subfamily A member 2)	Dnaja2 rCG_44346	412	6	21.9133	0.050139	21.9393	0.0405747	1.01819	0.0283378	>0.05
Q5M9I5	QCR6_RAT	Cytochrome b-c1 complex subunit 6, mitochondrial (Complex III subunit 6) (Complex III subunit VIII) (Cytochrome c1 non-heme 11 kDa protein) (Mitochondrial hinge protein) (Ubiquinol-cytochrome c reductase complex 11 kDa protein)	Uqcrh	89	3	26.5576	0.0315718	26.4964	0.035827	0.958464	0.0244125	>0.05
Q5MJ12	FXL16_RAT	F-box/LRR-repeat protein 16 (F-box and leucine-rich repeat protein 16) (Spinal cord injury and regeneration-related protein 1)	Fbxl16 Scirr1	479	8	24.3753	0.0288878	24.3932	0.0257721	1.01243	0.0182008	>0.05
Q5PPI8	Q5PPI8_RAT	Protein RGD1311805 (Uncharacterized protein)	RGD1311805	657	2	27.1721	0.10035	27.1498	0.091865	0.984659	0.0609792	>0.05
Q5PPJ9	SHLB2_RAT	Endophilin-B2 (SH3 domain-containing GRB2-like protein B2)	Sh3glb2	404	11	25.1048	0.031436	25.1618	0.0299198	1.0403	0.0217805	>0.05
Q5PQK2	Q5PQK2_RAT	Fusion, derived from t(1216) malignant liposarcoma (Human) (Protein Fus) (RCG39872, isoform CRA_d)	Fus rCG_39872	518	6	24.6923	0.0225801	24.7952	0.0218178	1.07391	0.0161847	<0.01
Q5PQK3	Q5PQK3_RAT	Protein Trim42 (Tripartite motif-containing 42)	Trim42	723	3	19.4225	0.0984398	19.2015	0.0809368	0.857953	0.0482599	>0.05
Q5PQL7	ITM2C_RAT	Integral membrane protein 2C [Cleaved into: CT-BRI3]	Itm2c	269	3	21.785	0.290106	22.0658	0.241035	1.21487	0.240698	>0.05
Q5PQN0	NCALD_RAT	Neurocalcin-delta	Ncald	193	7	26.7819	0.0309423	26.7099	0.033238	0.951291	0.0216749	>0.05
Q5QD51	AKA12_RAT	A-kinase anchor protein 12 (AKAP-12)	Akap12	1687	4	20.511	0.0786152	20.5079	0.0627569	0.997911	0.0430499	>0.05
Q5RJK5	Q5RJK5_RAT	Chromobox homolog 3 (HP1 gamma homolog, Drosophila) (Chromobox homolog 3 (HP1 gamma homolog, Drosophila), isoform CRA_a) (Protein LOC100360453)	LOC100360260 Cbx3 LOC100360453 rCG_52399	183	3	20.3291	0.0681305	20.1771	0.092234	0.900023	0.0571979	>0.05
Q5RJL0	ERMIN_RAT	Ermin (Juxtanodin) (JN)	Ermn	282	4	23.4084	0.0380434	23.4323	0.0352051	1.0167	0.0252145	>0.05
Q5RJN0	Q5RJN0_RAT	NADH dehydrogenase (Ubiquinone) Fe-S protein 7 (NADH dehydrogenase (Ubiquinone) Fe-S protein 7, isoform CRA_d) (Protein Ndufs7)	Ndufs7 rCG_29475	218	5	24.2185	0.0572903	24.164	0.068328	0.962986	0.044492	>0.05
Q5RJQ4	SIR2_RAT	NAD-dependent protein deacetylase sirtuin-2 (EC 3.5.1.-) (Regulatory protein SIR2 homolog 2) (SIR2-like protein 2)	Sirt2 Sir2l2	350	11	27.8089	0.0438575	27.8702	0.039629	1.04344	0.0292859	>0.05
Q5RJR2	TWF1_RAT	Twinfilin-1	Twf1 Ptk9	350	3	22.028	0.0476594	22.1035	0.0535938	1.05372	0.0401718	>0.05
Q5RK08	Q5RK08_RAT	Glioblastoma amplified sequence (Protein Gbas)	Gbas LOC498174	281	5	24.7052	0.0192312	24.7097	0.0344121	1.00309	0.0237193	>0.05
Q5RKG9	Q5RKG9_RAT	Eukaryotic translation initiation factor 4B (Protein Eif4b)	Eif4b rCG_50632	611	4	22.6348	0.0950696	22.5602	0.0843113	0.949626	0.0572964	>0.05
Q5RKI0	WDR1_RAT	WD repeat-containing protein 1	Wdr1	606	12	25.7079	0.0282912	25.7498	0.0379085	1.02946	0.0270122	>0.05
Q5RKI1	IF4A2_RAT	Eukaryotic initiation factor 4A-II (eIF-4A-II) (eIF4A-II) (EC 3.6.4.13) (ATP-dependent RNA helicase eIF4A-2) [Cleaved into: Eukaryotic initiation factor 4A-II, N-terminally processed]	Eif4a2	407	7	25.0589	0.030044	25.0518	0.0403183	0.995097	0.0271662	>0.05
Q5RKJ9	Q5RKJ9_RAT	RAB10, member RAS oncogene family (RAB10, member RAS oncogene family, isoform CRA_a) (Ras-related protein Rab-10)	Rab10 rCG_61836	200	7	26.2217	0.0408855	26.1932	0.0492814	0.980412	0.0331306	>0.05
Q5U1Z9	Q5U1Z9_RAT	Metaxin 2 (Protein Mtx2)	Mtx2 rCG_27294	263	4	22.163	0.0351405	22.1593	0.0247732	0.997457	0.0171892	>0.05
Q5U211	SNX3_RAT	Sorting nexin-3	Snx3	162	3	21.2446	0.091602	21.2078	0.0721719	0.974857	0.0469855	>0.05
Q5U2N2	Q5U2N2_RAT	Ubiquitin carboxyl-terminal hydrolase (EC 3.4.19.12)	Usp14 rCG_41276	493	2	19.9407	0.110038	19.8616	0.0884394	0.946637	0.0563005	>0.05
Q5U2N3	PITM1_RAT	Membrane-associated phosphatidylinositol transfer protein 1 (Phosphatidylinositol transfer protein, membrane-associated 1) (PITPnm 1) (Pyk2 N-terminal domain-interacting receptor 2) (NIR-2)	Pitpnm1 Nir2 Pitpnm	1242	2	20.078	0.0959795	20.1541	0.0775568	1.05418	0.0532253	>0.05
Q5U2P5	Q5U2P5_RAT	Protein C2cd2l (RCG58016) (Transmembrane protein 24)	C2cd2l Tmem24 rCG_58016	706	8	23.7138	0.0315138	23.7517	0.0294596	1.02663	0.0208594	>0.05
Q5U2Q5	Q5U2Q5_RAT	Ribonucleoside-diphosphate reductase (EC 1.17.4.1)	Rrm1 Rrm1_mapped rCG_40380	792	2	20.368	0.139766	20.6109	0.107961	1.18338	0.0917293	>0.05
Q5U2R0	MAT2B_RAT	Methionine adenosyltransferase 2 subunit beta (Methionine adenosyltransferase II beta) (MAT II beta)	Mat2b	334	3	22.2155	0.0264262	22.2013	0.0334031	0.990257	0.0229667	>0.05
Q5U2S7	Q5U2S7_RAT	Proteasome (Prosome, macropain) 26S subunit, non-ATPase, 3 (Proteasome (Prosome, macropain) 26S subunit, non-ATPase, 3, isoform CRA_b) (Protein Psmd3)	Psmd3 rCG_33694	530	3	21.7159	0.0274509	21.7199	0.0223454	1.00276	0.0156464	>0.05
Q5U2U2	CRKL_RAT	Crk-like protein	Crkl	303	3	21.4489	0.0666693	21.4178	0.086268	0.978687	0.0576338	>0.05
Q5U2X8	Q5U2X8_RAT	Acyl-CoA thioesterase 9 (Protein Acot9) (Similar to acyl-CoA thioesterase, isoform CRA_b)	Acot9 LOC302640 rCG_36383	439	6	22.897	0.031377	22.9852	0.0284573	1.06303	0.0209045	>0.05
Q5U2Z3	NP1L4_RAT	Nucleosome assembly protein 1-like 4	Nap1l4	386	6	23.0143	0.012549	22.9675	0.0343166	0.968119	0.0233262	>0.05
Q5U300	UBA1_RAT	Ubiquitin-like modifier-activating enzyme 1 (Ubiquitin-activating enzyme E1)	Uba1 Ube1	1058	23	27.4402	0.0328501	27.4741	0.0388266	1.02375	0.0278527	>0.05
Q5U302	Q5U302_RAT	Catenin (Cadherin associated protein), alpha 1 (Catenin (Cadherin-associated protein), alpha 1, isoform CRA_b) (Protein Ctnna1)	Ctnna1 Catna1 rCG_49560	908	8	23.5939	0.0261839	23.6305	0.0206959	1.02569	0.0148905	>0.05
Q5U318	PEA15_RAT	Astrocytic phosphoprotein PEA-15 (15 kDa phosphoprotein enriched in astrocytes)	Pea15	130	6	25.0695	0.012965	25.055	0.0265165	0.99	0.0185443	>0.05
Q5U330	Q5U330_RAT	Guanylate cyclase 1, soluble, alpha 3 (Guanylate cyclase soluble subunit alpha-3) (RCG62549)	Gucy1a3 rCG_62549	690	4	23.9754	0.165731	23.9523	0.207866	0.98412	0.141009	>0.05
Q5XHZ0	TRAP1_RAT	Heat shock protein 75 kDa, mitochondrial (HSP 75) (TNFR-associated protein 1) (Tumor necrosis factor type 1 receptor-associated protein) (TRAP-1)	Trap1 Hsp75	706	10	23.2692	0.0718613	23.2917	0.0788412	1.01568	0.0534202	>0.05
Q5XI32	CAPZB_RAT	F-actin-capping protein subunit beta (CapZ beta)	Capzb	272	9	24.4881	0.0694169	24.6174	0.0761726	1.09376	0.0569494	>0.05
Q5XI34	Q5XI34_RAT	Protein Ppp2r1a (Protein phosphatase 2 (Formerly 2A), regulatory subunit A (PR 65), alpha isoform, isoform CRA_a) (Protein phosphatase 2 (Formerly 2A), regulatory subunit A, alpha isoform)	Ppp2r1a rCG_22961	589	19	27.8806	0.042129	27.9333	0.0278427	1.03718	0.0196596	>0.05
Q5XI73	GDIR1_RAT	Rho GDP-dissociation inhibitor 1 (Rho GDI 1) (Rho-GDI alpha)	Arhgdia	204	9	26.8131	0.013185	26.8548	0.0268299	1.02936	0.0193883	>0.05
Q5XI77	Q5XI77_RAT	Annexin	Anxa11 rCG_39189	503	4	21.061	0.0650877	21.1147	0.059691	1.03794	0.0408043	>0.05
Q5XI78	ODO1_RAT	2-oxoglutarate dehydrogenase, mitochondrial (EC 1.2.4.2) (2-oxoglutarate dehydrogenase complex component E1) (OGDC-E1) (Alpha-ketoglutarate dehydrogenase)	Ogdh Ogdhl	1023	29	26.5286	0.0217449	26.5373	0.0200653	1.00602	0.0141008	>0.05
Q5XIC6	Q5XIC6_RAT	Proteasome (Prosome, macropain) 26S subunit, non-ATPase, 12 (Protein Psmd12)	Psmd12	456	3	23.2812	0.0894646	23.3552	0.136589	1.05263	0.104921	>0.05
Q5XID1	CPIN1_RAT	Anamorsin (Cytokine-induced apoptosis inhibitor 1) (Fe-S cluster assembly protein DRE2 homolog)	Ciapin1	309	2	21.0586	0.0368668	21.1552	0.0511276	1.06923	0.0388726	>0.05
Q5XIE6	HIBCH_RAT	3-hydroxyisobutyryl-CoA hydrolase, mitochondrial (EC 3.1.2.4) (3-hydroxyisobutyryl-coenzyme A hydrolase) (HIB-CoA hydrolase) (HIBYL-CoA-H)	Hibch	385	3	20.7655	0.043198	20.8889	0.101645	1.08923	0.0820291	>0.05
Q5XIF3	NDUS4_RAT	NADH dehydrogenase [ubiquinone] iron-sulfur protein 4, mitochondrial (Complex I-18 kDa) (CI-18 kDa) (NADH-ubiquinone oxidoreductase 18 kDa subunit)	Ndufs4	175	6	25.1584	0.0952028	25.1835	0.110195	1.01756	0.0795117	>0.05
Q5XIF6	TBA4A_RAT	Tubulin alpha-4A chain (Alpha-tubulin 4) (Tubulin alpha-4 chain)	Tuba4a Tuba4	448	30	33.5178	0.00839383	33.5098	0.0106861	0.994454	0.00731246	>0.05
Q5XIG4	OCAD1_RAT	OCIA domain-containing protein 1	Ociad1	247	3	20.5678	0.0584681	20.5139	0.0522008	0.963325	0.0349049	>0.05
Q5XIG8	STRAP_RAT	Serine-threonine kinase receptor-associated protein (UNR-interacting protein)	Strap Unrip	350	5	21.895	0.0843148	21.8349	0.0870186	0.959165	0.0557748	>0.05
Q5XIH3	Q5XIH3_RAT	NADH dehydrogenase (Ubiquinone) flavoprotein 1 (NADH dehydrogenase (Ubiquinone) flavoprotein 1, isoform CRA_a) (Protein LOC100911329)	Ndufv1 LOC100911329 rCG_47623	464	19	27.4681	0.00999129	27.4657	0.0122293	0.998315	0.00850434	>0.05
Q5XIH7	PHB2_RAT	Prohibitin-2 (B-cell receptor-associated protein BAP37) (BAP-37)	Phb2 Bcap37	299	11	25.781	0.0179197	25.7922	0.0408205	1.00775	0.0286184	>0.05
Q5XIJ3	Q5XIJ3_RAT	Isocitrate dehydrogenase [NAD] subunit, mitochondrial (EC 1.1.1.41)	Idh3g	393	12	25.6302	0.0171351	25.6234	0.019121	0.995259	0.0132103	>0.05
Q5XIL1	Q5XIL1_RAT	ATPase, H+ transporting, lysosomal V1 subunit H	Atp6v1h	441	15	26.5117	0.0426998	26.5865	0.0333787	1.05317	0.0247342	>0.05
Q5XIM5	CDV3_RAT	Protein CDV3 homolog	Cdv3	236	2	20.951	0.0468166	20.8797	0.063071	0.951791	0.0410604	>0.05
Q5XIM9	TCPB_RAT	T-complex protein 1 subunit beta (TCP-1-beta) (CCT-beta)	Cct2 Cctb	535	12	25.0901	0.00999768	25.0763	0.0151155	0.990474	0.010349	>0.05
Q5XIN6	LETM1_RAT	LETM1 and EF-hand domain-containing protein 1, mitochondrial (Leucine zipper-EF-hand-containing transmembrane protein 1)	Letm1	739	13	24.6245	0.0299047	24.6543	0.0323757	1.02088	0.0227009	>0.05
Q5XIT1	MARE3_RAT	Microtubule-associated protein RP/EB family member 3 (EB1 protein family member 3) (EBF3) (End-binding protein 3) (EB3) (RP3)	Mapre3	281	8	24.9131	0.0344162	24.85	0.0427117	0.957169	0.0284119	>0.05
Q62634	VGLU1_RAT	Vesicular glutamate transporter 1 (VGluT1) (Brain-specific Na(+)-dependent inorganic phosphate cotransporter) (Solute carrier family 17 member 7)	Slc17a7 Bnpi Vglut1	560	5	25.0958	0.0330671	25.1195	0.0289038	1.01656	0.0201467	>0.05
Q62636	RAP1B_RAT	Ras-related protein Rap-1b (GTP-binding protein smg p21B)	Rap1b	184	6	24.9804	0.041039	24.9075	0.0554141	0.950724	0.0364862	>0.05
Q62656	PTPRZ_RAT	Receptor-type tyrosine-protein phosphatase zeta (R-PTP-zeta) (EC 3.1.3.48) (3F8 chondroitin sulfate proteoglycan) (3H1 keratan sulfate proteoglycan) (Phosphacan)	Ptprz1 Ptprz Ptpz	2316	9	26.7707	0.139516	26.961	0.118439	1.141	0.0920021	>0.05
Q62658	FKB1A_RAT	Peptidyl-prolyl cis-trans isomerase FKBP1A (PPIase FKBP1A) (EC 5.2.1.8) (12 kDa FK506-binding protein) (12 kDa FKBP) (FKBP-12) (FK506-binding protein 1A) (FKBP-1A) (Immunophilin FKBP12) (Rotamase)	Fkbp1a Fkbp1	108	8	27.4369	0.0378067	27.4479	0.0290432	1.00768	0.0200206	>0.05
Q62688	PLCL1_RAT	Inactive phospholipase C-like protein 1 (PLC-L1) (PRIP1) (Phospholipase C-related but catalytically inactive protein) (p130)	Plcl1	1096	4	21.474	0.0225432	21.473	0.0189531	0.99931	0.0133452	>0.05
Q62696	DLG1_RAT	Disks large homolog 1 (Synapse-associated protein 97) (SAP-97) (SAP97)	Dlg1 Dlgh1	911	9	24.7752	0.0247743	24.7873	0.0362663	1.00843	0.0244297	>0.05
Q62698	DC1L2_RAT	Cytoplasmic dynein 1 light intermediate chain 2 (Dynein light intermediate chain 2, cytosolic) (LIC-2) (LIC53/55)	Dync1li2 Dncli2	497	5	22.336	0.0462211	22.3656	0.0699121	1.02074	0.0486367	>0.05
Q62703	RCN2_RAT	Reticulocalbin-2 (Calcium-binding protein ERC-55) (Taipoxin-associated calcium-binding protein 49) (TCBP-49)	Rcn2 Erc55	320	3	21.3144	0.0508046	21.2818	0.0332491	0.977608	0.0221477	>0.05
Q62717	CAPS1_RAT	Calcium-dependent secretion activator 1 (Calcium-dependent activator protein for secretion 1) (CAPS-1) (rCAPS)	Cadps Caps Caps1	1289	17	24.7268	0.0211374	24.7306	0.0292112	1.00265	0.0203744	>0.05
Q62733	LAP2_RAT	Lamina-associated polypeptide 2, isoform beta (Thymopoietin isoform beta) (TP beta)	Tmpo Lap2	452	2	21.0657	0.0455442	21.2089	0.0482769	1.10436	0.0377473	<0.05
Q62785	HAP28_RAT	28 kDa heat- and acid-stable phosphoprotein (PDGF-associated protein) (PAP) (PDGFA-associated protein 1) (PAP1)	Pdap1 Haspp28	181	4	22.6071	0.0514325	22.5653	0.082963	0.971445	0.0568911	>0.05
Q62813	LSAMP_RAT	Limbic system-associated membrane protein (LSAMP)	Lsamp Lamp	338	8	26.2255	0.0397013	26.2679	0.0349926	1.02981	0.0254078	>0.05
Q62847	ADDG_RAT	Gamma-adducin (Adducin-like protein 70) (Protein kinase C-binding protein 35H)	Add3	705	8	23.607	0.0161398	23.5989	0.0192613	0.99444	0.0130291	>0.05
Q62848	ARFG1_RAT	ADP-ribosylation factor GTPase-activating protein 1 (ARF GAP 1) (ADP-ribosylation factor 1 GTPase-activating protein) (ARF1 GAP) (ARF1-directed GTPase-activating protein)	Arfgap1 Arf1gap	415	5	22.8363	0.0947133	22.9392	0.0604671	1.07397	0.0424124	>0.05
Q62868	ROCK2_RAT	Rho-associated protein kinase 2 (EC 2.7.11.1) (Rho-associated, coiled-coil-containing protein kinase 2) (Rho-associated, coiled-coil-containing protein kinase II) (ROCK-II) (RhoA-binding kinase 2) (p150 ROK-alpha) (ROKalpha) (p164 ROCK-2)	Rock2	1388	7	24.7039	0.106522	24.4675	0.110958	0.848844	0.0587328	>0.05
Q62876	SNG1_RAT	Synaptogyrin-1 (p29)	Syngr1	234	2	25.2015	0.0363961	25.2496	0.0393602	1.03395	0.0286108	>0.05
Q62889	NLGN3_RAT	Neuroligin-3 (Gliotactin homolog)	Nlgn3	848	3	21.453	0.0403538	21.4794	0.0392652	1.01846	0.0275398	>0.05
Q62910	SYNJ1_RAT	Synaptojanin-1 (EC 3.1.3.36) (Synaptic inositol 1,4,5-trisphosphate 5-phosphatase 1)	Synj1	1574	26	27.0483	0.0142109	27.0261	0.0226325	0.984746	0.0155532	>0.05
Q62915	CSKP_RAT	Peripheral plasma membrane protein CASK (EC 2.7.11.1) (Calcium/calmodulin-dependent serine protein kinase)	Cask	909	6	22.6137	0.0162685	22.6157	0.0193392	1.00135	0.0132577	>0.05
Q62950	DPYL1_RAT	Dihydropyrimidinase-related protein 1 (DRP-1) (Collapsin response mediator protein 1) (CRMP-1)	Crmp1 Dpysl1	572	30	29.6291	0.013615	29.642	0.0139335	1.00894	0.00973376	>0.05
Q62951	DPYL4_RAT	Dihydropyrimidinase-related protein 4 (DRP-4) (Collapsin response mediator protein 3) (CRMP-3) (UNC33-like phosphoprotein 4) (ULIP-4) (Fragment)	Dpysl4 Crmp3 Ulip4	564	20	26.5364	0.0159556	26.5582	0.0297217	1.01522	0.0207714	>0.05
Q62952	DPYL3_RAT	Dihydropyrimidinase-related protein 3 (DRP-3) (Collapsin response mediator protein 4) (CRMP-4) (TOAD-64/Ulip/CRMP) (TUC-4b)	Dpysl3 Crmp4	570	23	28.8522	0.0171271	28.8926	0.0158086	1.02841	0.0112761	>0.05
Q62976	KCMA1_RAT	Calcium-activated potassium channel subunit alpha-1 (BK channel) (BKCA alpha) (Calcium-activated potassium channel, subfamily M subunit alpha-1) (K(VCA)alpha) (KCa1.1) (Maxi K channel) (MaxiK) (Slo-alpha) (Slo1) (Slowpoke homolog) (Slo homolog)	Kcnma1 Kcnma	1209	2	19.4461	0.0893101	19.6425	0.0465275	1.14585	0.0369681	>0.05
Q63011	Q63011_RAT	Zero beta-globin (Fragment)	0	146	10	29.6582	0.0472703	29.6001	0.0350693	0.960531	0.0232674	>0.05
Q63028	ADDA_RAT	Alpha-adducin (Erythrocyte adducin subunit alpha)	Add1	735	20	27.1834	0.013389	27.1602	0.0152711	0.984033	0.0103859	>0.05
Q63041	A1M_RAT	Alpha-1-macroglobulin (Alpha-1-M) (Alpha-1-macroglobulin 165 kDa subunit) [Cleaved into: Alpha-1-macroglobulin 45 kDa subunit]	A1m Pzp	1500	3	20.6318	0.0669085	20.7037	0.0856296	1.0511	0.0645389	>0.05
Q63081	PDIA6_RAT	Protein disulfide-isomerase A6 (EC 5.3.4.1) (Calcium-binding protein 1) (CaBP1) (Protein disulfide isomerase P5) (Thioredoxin domain-containing protein 7)	Pdia6 Cabp1 Txndc7	440	8	23.5737	0.0198754	23.5885	0.0312741	1.01025	0.0214571	>0.05
Q63100	DC1I1_RAT	Cytoplasmic dynein 1 intermediate chain 1 (Cytoplasmic dynein intermediate chain 1) (Dynein intermediate chain 1, cytosolic) (DH IC-1)	Dync1i1 Dnci1 Dncic1	643	5	22.2252	0.032751	22.2775	0.0235623	1.03688	0.0169006	>0.05
Q63198	CNTN1_RAT	Contactin-1 (Neural cell surface protein F3)	Cntn1	1021	32	28.0093	0.0223605	28.0317	0.0177159	1.01564	0.0124715	>0.05
Q63228	GMFB_RAT	Glia maturation factor beta (GMF-beta)	Gmfb	142	2	24.1605	0.0736055	24.1943	0.0453955	1.02373	0.0325909	>0.05
Q63345	MOG_RAT	Myelin-oligodendrocyte glycoprotein	Mog	245	7	27.3938	0.0230879	27.4255	0.0261899	1.0222	0.0188159	>0.05
Q63347	PRS7_RAT	26S protease regulatory subunit 7 (26S proteasome AAA-ATPase subunit RPT1) (Proteasome 26S subunit ATPase 2) (Protein MSS1)	Psmc2 Mss1	433	6	22.1819	0.0406989	22.174	0.0380606	0.994544	0.0258691	>0.05
Q63357	MYO1D_RAT	Unconventional myosin-Id (Myosin heavy chain myr 4)	Myo1d Myr4	1006	3	21.2951	0.0439171	21.3903	0.0369791	1.06824	0.0270532	>0.05
Q63362	NDUA5_RAT	NADH dehydrogenase [ubiquinone] 1 alpha subcomplex subunit 5 (Complex I subunit B13) (Complex I-13kD-B) (CI-13kD-B) (NADH-ubiquinone oxidoreductase 13 kDa-B subunit)	Ndufa5	116	5	24.9348	0.0296602	24.9288	0.0298353	0.995806	0.020647	>0.05
Q63377	AT1B3_RAT	Sodium/potassium-transporting ATPase subunit beta-3 (Sodium/potassium-dependent ATPase subunit beta-3) (ATPB-3) (CD antigen CD298)	Atp1b3	279	2	22.252	0.0457923	22.3927	0.0692039	1.10246	0.0573634	>0.05
Q63413	DX39B_RAT	Spliceosome RNA helicase Ddx39b (EC 3.6.4.13) (56 kDa U2AF65-associated protein) (ATP-dependent RNA helicase p47) (DEAD box protein Uap56)	Ddx39b Bat1 Bat1a Uap56	428	6	22.7151	0.0435174	22.7833	0.0400931	1.04839	0.0303563	>0.05
Q63460	Q63460_RAT	Proline-rich protein (Fragment)	PRP	5027	3	16.3405	0.519473	17.3323	0.13338	1.98868	0.195051	>0.05
Q63525	NUDC_RAT	Nuclear migration protein nudC (Nuclear distribution protein C homolog) (c15)	Nudc	332	7	22.401	0.045077	22.4593	0.0433771	1.04123	0.0324496	>0.05
Q63537	SYN2_RAT	Synapsin-2 (Synapsin II)	Syn2	586	25	30.0454	0.0123776	30.0565	0.0129451	1.0077	0.00902333	>0.05
Q63555	Q63555_RAT	SP120	0	798	8	24.7869	0.0234553	24.7719	0.0280294	0.989648	0.0198757	>0.05
Q63560	MAP6_RAT	Microtubule-associated protein 6 (MAP-6) (145-kDa STOP) (STOP145) (Stable tubule-only polypeptide) (STOP)	Map6 Mtap6	952	34	29.0172	0.0129781	29.023	0.0266016	1.00402	0.0186476	>0.05
Q63564	SV2B_RAT	Synaptic vesicle glycoprotein 2B (Synaptic vesicle protein 2B)	Sv2b Sv2bb	683	6	23.6135	0.0223234	23.6016	0.0193761	0.9918	0.0131916	>0.05
Q63569	PRS6A_RAT	26S protease regulatory subunit 6A (26S proteasome AAA-ATPase subunit RPT5) (Proteasome 26S subunit ATPase 3) (Spermatogenic cell/sperm-associated Tat-binding protein homolog SATA) (Tat-binding protein 1) (TBP-1)	Psmc3 Tbp1	439	8	22.3538	0.0386557	22.3381	0.0469254	0.989215	0.0335837	>0.05
Q63598	PLST_RAT	Plastin-3 (T-plastin)	Pls3	630	4	21.0662	0.0288877	21.0477	0.0431069	0.987266	0.0298435	>0.05
Q63604	NTRK2_RAT	BDNF/NT-3 growth factors receptor (EC 2.7.10.1) (Neurotrophic tyrosine kinase receptor type 2) (TrkB tyrosine kinase) (Trk-B)	Ntrk2 Trkb	821	2	20.5304	0.0340195	20.5457	0.0668141	1.01068	0.0459089	>0.05
Q63610	TPM3_RAT	Tropomyosin alpha-3 chain (Gamma-tropomyosin) (Tropomyosin-3) (Tropomyosin-5)	Tpm3 Tpm-5 Tpm5	248	14	27.5118	0.0316414	27.506	0.0504332	0.995977	0.0351725	>0.05
Q63617	HYOU1_RAT	Hypoxia up-regulated protein 1 (150 kDa oxygen-regulated protein) (ORP-150)	Hyou1 Orp150	999	7	22.3704	0.112567	22.3705	0.123483	1.00007	0.0917049	>0.05
Q63622	DLG2_RAT	Disks large homolog 2 (Channel-associated protein of synapse-110) (Chapsyn-110) (Postsynaptic density protein PSD-93)	Dlg2 Dlgh2	852	15	26.0606	0.0568897	26.1649	0.0297164	1.07499	0.0221213	>0.05
Q63633	S12A5_RAT	Solute carrier family 12 member 5 (Electroneutral potassium-chloride cotransporter 2) (Furosemide-sensitive K-Cl cotransporter) (K-Cl cotransporter 2) (rKCC2) (Neuronal K-Cl cotransporter)	Slc12a5 Kcc2	1139	10	24.8111	0.0334493	24.8205	0.026078	1.00659	0.0182162	>0.05
Q63692	CDC37_RAT	Hsp90 co-chaperone Cdc37 (Hsp90 chaperone protein kinase-targeting subunit) (p50Cdc37) [Cleaved into: Hsp90 co-chaperone Cdc37, N-terminally processed]	Cdc37	379	3	23.6643	0.0486399	23.6991	0.0456343	1.02441	0.0318732	>0.05
Q63716	PRDX1_RAT	Peroxiredoxin-1 (EC 1.11.1.15) (HBP23) (Heme-binding 23 kDa protein) (Thioredoxin peroxidase 2) (Thioredoxin-dependent peroxide reductase 2)	Prdx1 Tdpx2	199	12	27.4149	0.0285132	27.4371	0.0331626	1.0155	0.023578	>0.05
Q63754	SYUB_RAT	Beta-synuclein (Phosphoneuroprotein 14) (PNP 14)	Sncb	137	6	28.0141	0.0684095	28.0234	0.0766157	1.00645	0.0559939	>0.05
Q63768	CRK_RAT	Adapter molecule crk (Proto-oncogene c-Crk) (p38)	Crk Crko	304	4	22.8419	0.0340698	22.8775	0.0242766	1.025	0.0170898	>0.05
Q63797	PSME1_RAT	Proteasome activator complex subunit 1 (11S regulator complex subunit alpha) (REG-alpha) (Activator of multicatalytic protease subunit 1) (Proteasome activator 28 subunit alpha) (PA28a) (PA28alpha)	Psme1	249	2	18.4404	0.179563	18.3022	0.250309	0.908684	0.114537	>0.05
Q63910	Q63910_RAT	Alpha globin (Protein LOC287167) (RCG33691)	LOC287167 GloA rCG_33691	142	4	27.3544	0.0173635	27.3359	0.0187543	0.987248	0.0127562	>0.05
Q64057	AL7A1_RAT	Alpha-aminoadipic semialdehyde dehydrogenase (Alpha-AASA dehydrogenase) (EC 1.2.1.31) (Aldehyde dehydrogenase family 7 member A1) (EC 1.2.1.3) (Antiquitin-1) (Betaine aldehyde dehydrogenase) (EC 1.2.1.8) (Delta1-piperideine-6-carboxylate dehydrogenase) (P6c dehydrogenase)	Aldh7a1 Ald7a1	539	5	21.8316	0.0250442	21.8806	0.0486639	1.03459	0.0356039	>0.05
Q64119	MYL6_RAT	Myosin light polypeptide 6 (17 kDa myosin light chain) (LC17) (Myosin light chain 3) (MLC-3) (Myosin light chain alkali 3) (Myosin light chain A3) (Smooth muscle and nonmuscle myosin light chain alkali 6)	Myl6	151	6	25.6537	0.0397609	25.6145	0.0421358	0.973223	0.0287165	>0.05
Q641Y2	NDUS2_RAT	NADH dehydrogenase [ubiquinone] iron-sulfur protein 2, mitochondrial (EC 1.6.5.3) (EC 1.6.99.3) (Complex I-49kD) (CI-49kD) (NADH-ubiquinone oxidoreductase 49 kDa subunit)	Ndufs2	463	11	26.0432	0.0336502	26.0236	0.0336471	0.986488	0.0229935	>0.05
Q641Y8	DDX1_RAT	ATP-dependent RNA helicase DDX1 (EC 3.6.4.13) (DEAD box protein 1)	Ddx1	740	6	22.0774	0.0466928	22.0543	0.0339984	0.984095	0.0224334	>0.05
Q64232	TECR_RAT	Very-long-chain enoyl-CoA reductase (EC 1.3.1.93) (Synaptic glycoprotein SC2) (Trans-2,3-enoyl-CoA reductase) (TER)	Tecr Gpsn2	308	2	19.6054	0.0747282	19.8024	0.086327	1.14634	0.0720566	>0.05
Q64303	PAK2_RAT	Serine/threonine-protein kinase PAK 2 (EC 2.7.11.1) (Gamma-PAK) (p21-activated kinase 2) (PAK-2) [Cleaved into: PAK-2p27; PAK-2p34]	Pak2	524	6	23.686	0.0351848	23.7502	0.0349615	1.04555	0.0252755	>0.05
Q64361	LXN_RAT	Latexin (Endogenous carboxypeptidase inhibitor) (ECI) (Tissue carboxypeptidase inhibitor) (TCI)	Lxn	223	2	20.8542	0.072768	20.9304	0.0579011	1.05421	0.0426165	>0.05
Q64428	ECHA_RAT	Trifunctional enzyme subunit alpha, mitochondrial (TP-alpha) [Includes: Long-chain enoyl-CoA hydratase (EC 4.2.1.17); Long chain 3-hydroxyacyl-CoA dehydrogenase (EC 1.1.1.211)]	Hadha	763	10	23.7634	0.0237161	23.7652	0.0287435	1.00124	0.0197559	>0.05
Q64537	CPNS1_RAT	Calpain small subunit 1 (CSS1) (Calcium-activated neutral proteinase small subunit) (CANP small subunit) (Calcium-dependent protease small subunit) (CDPS) (Calcium-dependent protease small subunit 1) (Calpain regulatory subunit)	Capns1 Capn4 Css1	270	3	21.5424	0.0686045	21.4167	0.0693347	0.916559	0.040488	>0.05
Q64542	AT2B4_RAT	Plasma membrane calcium-transporting ATPase 4 (PMCA4) (EC 3.6.3.8) (Plasma membrane calcium ATPase isoform 4) (Plasma membrane calcium pump isoform 4)	Atp2b4	1203	20	27.9146	0.0328393	27.9235	0.0309586	1.00623	0.0215977	>0.05
Q64548	RTN1_RAT	Reticulon-1 (Neuroendocrine-specific protein) (S-rex)	Rtn1 Nsp	777	22	27.2933	0.0159144	27.2937	0.0233733	1.00028	0.0163212	>0.05
Q64548	RTN1_RAT	Reticulon-1 (Neuroendocrine-specific protein) (S-rex)	Rtn1 Nsp	777	22	27.2933	0.0159144	27.2937	0.0233733	1.00933	0.0163212	>0.05
Q64560	TPP2_RAT	Tripeptidyl-peptidase 2 (TPP-2) (EC 3.4.14.10) (Tripeptidyl aminopeptidase) (Tripeptidyl-peptidase II) (TPP-II)	Tpp2	1249	7	21.9733	0.0571284	21.973	0.0488752	0.999758	0.03358	>0.05
Q64568	AT2B3_RAT	Plasma membrane calcium-transporting ATPase 3 (PMCA3) (EC 3.6.3.8) (Plasma membrane calcium ATPase isoform 3) (Plasma membrane calcium pump isoform 3)	Atp2b3 Pmca3	1258	17	27.3434	0.0249006	27.3479	0.0326913	1.00312	0.023621	>0.05
Q64640	ADK_RAT	Adenosine kinase (AK) (EC 2.7.1.20) (Adenosine 5'-phosphotransferase)	Adk	361	3	21.7497	0.0988056	21.8325	0.127171	1.0591	0.113785	>0.05
Q66H09	Q66H09_RAT	Protein Ttc1 (Tetratricopeptide repeat domain 1)	Ttc1 rCG_32719	292	2	20.3931	0.086646	20.4244	0.090156	1.02189	0.062825	>0.05
Q66H62	CYLD_RAT	Ubiquitin carboxyl-terminal hydrolase CYLD (EC 3.4.19.12) (Deubiquitinating enzyme CYLD) (Ubiquitin thioesterase CYLD) (Ubiquitin-specific-processing protease CYLD)	Cyld Cyld1	953	5	21.9332	0.0381596	21.9817	0.0344953	1.03417	0.0247623	>0.05
Q66HA6	ARL8B_RAT	ADP-ribosylation factor-like protein 8B	Arl8b	186	4	23.9533	0.0529496	23.9561	0.0600688	1.00198	0.0419261	>0.05
Q66HA8	HS105_RAT	Heat shock protein 105 kDa (Heat shock 110 kDa protein)	Hsph1 Hsp105 Hsp110	858	22	26.2025	0.0353868	26.2388	0.0283067	1.0255	0.0202214	>0.05
Q66HD0	ENPL_RAT	Endoplasmin (94 kDa glucose-regulated protein) (GRP-94) (Heat shock protein 90 kDa beta member 1)	Hsp90b1 Grp94 Tra1	804	15	25.6032	0.0882894	25.658	0.100606	1.03872	0.0760088	>0.05
Q66HF1	NDUS1_RAT	NADH-ubiquinone oxidoreductase 75 kDa subunit, mitochondrial (EC 1.6.5.3) (EC 1.6.99.3)	Ndufs1	727	23	27.958	0.0307088	27.9915	0.0355395	1.0235	0.0256908	>0.05
Q66HF8	AL1B1_RAT	Aldehyde dehydrogenase X, mitochondrial (EC 1.2.1.3) (Aldehyde dehydrogenase family 1 member B1)	Aldh1b1 Aldhx	519	7	23.9285	0.0550449	23.8956	0.0506372	0.977444	0.0328208	>0.05
Q66HR2	MARE1_RAT	Microtubule-associated protein RP/EB family member 1 (APC-binding protein EB1) (End-binding protein 1) (EB1)	Mapre1	268	6	24.105	0.0402018	24.0517	0.0718886	0.96371	0.0475583	>0.05
Q66X93	SND1_RAT	Staphylococcal nuclease domain-containing protein 1 (100 kDa coactivator) (SND p102) (p100 co-activator) (p105 coactivator)	Snd1	909	4	21.3133	0.0280224	21.2888	0.0391757	0.983128	0.0273552	>0.05
Q68A21	PURB_RAT	Transcriptional activator protein Pur-beta (Purine-rich element-binding protein B)	Purb	315	6	24.5377	0.0334785	24.5748	0.0350016	1.02603	0.0252825	>0.05
Q68FP1	GELS_RAT	Gelsolin (Actin-depolymerizing factor) (ADF) (Brevin)	Gsn	780	9	24.2858	0.0401007	24.2669	0.0607342	0.986995	0.0428393	>0.05
Q68FQ0	TCPE_RAT	T-complex protein 1 subunit epsilon (TCP-1-epsilon) (CCT-epsilon)	Cct5	541	14	24.7989	0.102887	24.8784	0.0698508	1.05665	0.0523566	>0.05
Q68FQ9	Q68FQ9_RAT	LanC lantibiotic synthetase component C-like 2 (Bacterial) (Protein Lancl2)	Lancl2	450	8	23.9714	0.0495014	24.0647	0.0382967	1.06683	0.0273673	>0.05
Q68FR6	EF1G_RAT	Elongation factor 1-gamma (EF-1-gamma) (eEF-1B gamma)	Eef1g	437	9	24.3086	0.0281542	24.2915	0.0473693	0.988255	0.0307056	>0.05
Q68FR9	EF1D_RAT	Elongation factor 1-delta (EF-1-delta)	Eef1d	281	3	23.1803	0.0266271	23.1653	0.0388422	0.989615	0.0267045	>0.05
Q68FS2	CSN4_RAT	COP9 signalosome complex subunit 4 (SGN4) (Signalosome subunit 4) (JAB1-containing signalosome subunit 4)	Cops4 Csn4	406	3	20.2159	0.107692	20.392	0.0797847	1.12981	0.0629209	>0.05
Q68FS4	AMPL_RAT	Cytosol aminopeptidase (EC 3.4.11.1) (Leucine aminopeptidase 3) (LAP-3) (Leucyl aminopeptidase) (Proline aminopeptidase) (EC 3.4.11.5) (Prolyl aminopeptidase)	Lap3	519	10	24.4009	0.0405048	24.4214	0.0369636	1.01432	0.0252156	>0.05
Q68FU2	Q68FU2_RAT	Phosphoserine aminotransferase (EC 2.6.1.52)	Psat1	370	10	25.3324	0.0154246	25.2794	0.0172848	0.963918	0.011455	<0.05
Q68FU3	ETFB_RAT	Electron transfer flavoprotein subunit beta (Beta-ETF)	Etfb	255	5	22.7487	0.0360556	22.7658	0.0489477	1.01191	0.0355078	>0.05
Q68FW9	CSN3_RAT	COP9 signalosome complex subunit 3 (SGN3) (Signalosome subunit 3)	Cops3 Csn3	423	2	21.5368	0.102362	21.5264	0.0537057	0.992793	0.0372739	>0.05
Q68FX0	IDH3B_RAT	Isocitrate dehydrogenase [NAD] subunit beta, mitochondrial (EC 1.1.1.41) (Isocitric dehydrogenase subunit beta) (NAD(+)-specific ICDH subunit beta)	Idh3B	385	16	26.908	0.0401273	26.955	0.0332206	1.03316	0.0239104	>0.05
Q68FX1	MPI_RAT	Mannose-6-phosphate isomerase (EC 5.3.1.8) (Phosphohexomutase) (Phosphomannose isomerase) (PMI)	Mpi	423	3	20.6573	0.0530502	20.5661	0.0727572	0.938733	0.0477591	>0.05
Q68FX9	SIR5_RAT	NAD-dependent protein deacylase sirtuin-5, mitochondrial (EC 3.5.1.-) (Regulatory protein SIR2 homolog 5) (SIR2-like protein 5)	Sirt5	310	7	22.5429	0.0370377	22.502	0.0594109	0.972036	0.0414479	>0.05
Q68FY0	QCR1_RAT	Cytochrome b-c1 complex subunit 1, mitochondrial (Complex III subunit 1) (Core protein I) (Ubiquinol-cytochrome-c reductase complex core protein 1)	Uqcrc1	480	14	27.9766	0.027965	28.0412	0.0194291	1.04584	0.0140451	>0.05
Q68FZ8	Q68FZ8_RAT	Propionyl coenzyme A carboxylase, beta polypeptide (Propionyl coenzyme A carboxylase, beta polypeptide, isoform CRA_b) (Propionyl-CoA carboxylase beta chain, mitochondrial)	Pccb rCG_25130	541	4	21.2345	0.0639257	21.4152	0.0385933	1.13338	0.030971	<0.05
Q68G16	Q68G16_RAT	Serine/threonine-protein phosphatase (EC 3.1.3.16)	Ppp5c	499	4	21.9764	0.120508	22.0063	0.121532	1.02098	0.0770806	>0.05
Q6AXM7	HBS1L_RAT	HBS1-like protein	Hbs1l	679	2	21.1317	0.152614	21.1247	0.110911	0.995148	0.07435	>0.05
Q6AXR6	Q6AXR6_RAT	Glutathione S-transferase omega 1 (Glutathione S-transferase omega 1, isoform CRA_b) (Glutathione S-transferase omega-1)	Gsto1 rCG_57583	241	5	24.8537	0.0455131	24.8141	0.0468485	0.972938	0.0298044	>0.05
Q6AXU6	HN1_RAT	Hematological and neurological expressed 1 protein [Cleaved into: Hematological and neurological expressed 1 protein, N-terminally processed]	Hn1	149	4	21.8526	0.0569863	21.7211	0.0721501	0.912905	0.0451385	>0.05
Q6AXV4	SAM50_RAT	Sorting and assembly machinery component 50 homolog	Samm50	469	3	21.7084	0.0334838	21.7461	0.042804	1.02648	0.030047	>0.05
Q6AXX6	F213A_RAT	Redox-regulatory protein FAM213A (Peroxiredoxin-like 2 activated in M-CSF stimulated monocytes) (Protein PAMM) (Sperm head protein 1)	Fam213a Pamm Shp1	229	3	21.7617	0.0573338	21.692	0.0749794	0.952816	0.0497506	>0.05
Q6AY04	CB047_RAT	Uncharacterized protein C2orf47 homolog, mitochondrial	0	291	2	19.3419	0.0965511	19.3949	0.0695208	1.03739	0.0500516	>0.05
Q6AY09	HNRH2_RAT	Heterogeneous nuclear ribonucleoprotein H2 (hnRNP H2) (Heterogeneous nuclear ribonucleoprotein H') (hnRNP H')	Hnrnph2 Hnrph2	449	7	25.2907	0.0294549	25.3277	0.03285	1.026	0.0239961	>0.05
Q6AY18	Q6AY18_RAT	Protein Sar1a (SAR1 gene homolog A (S. cerevisiae), isoform CRA_b) (SAR1 homolog A (S. cerevisiae))	Sar1a rCG_22123	198	3	23.3133	0.0471182	23.4138	0.0842317	1.07216	0.0632329	>0.05
Q6AY21	Q6AY21_RAT	GTPase activating protein (SH3 domain) binding protein 2 (Protein G3bp2) (Similar to RNA-binding protein isoform G3BP-2a, isoform CRA_b)	G3bp2 RGD1309571 rCG_60442	449	2	21.3354	0.0943689	21.2999	0.0986203	0.975708	0.0631637	>0.05
Q6AY30	SCPDL_RAT	Saccharopine dehydrogenase-like oxidoreductase (EC 1.-.-.-)	Sccpdh	429	11	24.6138	0.0655763	24.6934	0.0512094	1.05673	0.0386839	>0.05
Q6AY41	CC50A_RAT	Cell cycle control protein 50A (P4-ATPase flippase complex beta subunit TMEM30A) (Transmembrane protein 30A)	Tmem30a Cdc50a	328	2	19.9873	0.0933196	20.0539	0.0958572	1.04726	0.070873	>0.05
Q6AY84	SCRN1_RAT	Secernin-1	Scrn1	414	10	25.6115	0.02675	25.6685	0.0391054	1.0403	0.0282801	>0.05
Q6AYG5	ECHD1_RAT	Ethylmalonyl-CoA decarboxylase (EC 4.1.1.94) (Enoyl-CoA hydratase domain-containing protein 1) (Methylmalonyl-CoA decarboxylase) (MMCD) (EC 4.1.1.41)	Echdc1	299	3	20.3745	0.0424176	20.4299	0.0736518	1.03914	0.0546251	>0.05
Q6AYH5	DCTN2_RAT	Dynactin subunit 2	Dctn2	402	9	25.4055	0.0649837	25.4682	0.0716733	1.04443	0.0507515	>0.05
Q6AYN4	PHIPL_RAT	Phytanoyl-CoA hydroxylase-interacting protein-like	Phyhipl	375	7	22.7118	0.0282153	22.7312	0.0304052	1.01354	0.0216803	>0.05
Q6AYP5	Q6AYP5_RAT	Cell adhesion molecule 1 (Protein Cadm1)	Cadm1	476	5	24.7932	0.0885253	24.8612	0.0871033	1.04823	0.0634194	>0.05
Q6AYR2	NDRG3_RAT	Protein NDRG3 (N-myc downstream-regulated gene 3 protein)	Ndrg3 Ndr3	375	4	21.6301	0.0480916	21.5656	0.0452003	0.956291	0.0284311	>0.05
Q6AYS2	Q6AYS2_RAT	Sideroflexin	Sfxn1 rCG_24191	322	6	24.6931	0.0219115	24.7044	0.0307107	1.00791	0.0218747	>0.05
Q6AYS7	ACY1A_RAT	Aminoacylase-1A (ACY-1A) (EC 3.5.1.14) (ACY IA) (N-acyl-L-amino-acid amidohydrolase)	Acy1a Acy1	408	2	20.94	0.0660813	21.0705	0.0269468	1.09466	0.0208048	>0.05
Q6AYT3	RTCB_RAT	tRNA-splicing ligase RtcB homolog (EC 6.5.1.3) (p55)	Rtcb	505	5	21.664	0.0284022	21.6716	0.0459573	1.00525	0.0311115	>0.05
Q6AYU5	Q6AYU5_RAT	Poly(RC) binding protein 2 (Protein Pcbp2)	Pcbp2	365	7	25.1958	0.0540159	25.2979	0.0737571	1.07331	0.0581956	>0.05
Q6AZ26	Q6AZ26_RAT	C-terminal binding protein 1 (C-terminal-binding protein 1)	Ctbp1	391	7	25.2272	0.0624083	25.2969	0.0838266	1.04945	0.0580503	>0.05
Q6DGF2	Q6DGF2_RAT	Enthoprotin (Protein Clint1)	Clint1 Enth	472	3	20.5298	0.0441805	20.6104	0.0694045	1.05749	0.0502709	>0.05
Q6DGG0	PPID_RAT	Peptidyl-prolyl cis-trans isomerase D (PPIase D) (EC 5.2.1.8) (40 kDa peptidyl-prolyl cis-trans isomerase) (Cyclophilin-40) (CYP-40) (Rotamase D)	Ppid	370	11	24.2242	0.081414	24.3455	0.121728	1.08774	0.110693	>0.05
Q6GMN2	BAIP2_RAT	Brain-specific angiogenesis inhibitor 1-associated protein 2 (BAI-associated protein 2) (BAI1-associated protein 2) (Insulin receptor substrate protein of 53 kDa) (IRSp53) (Insulin receptor substrate p53) (Insulin receptor tyrosine kinase substrate protein p53)	Baiap2	535	13	25.7526	0.0308663	25.7494	0.023055	0.997797	0.0158711	>0.05
Q6I7R3	ISOC1_RAT	Isochorismatase domain-containing protein 1 (Down-regulated in nephrectomized rat kidney protein 1) (DR-NR1)	Isoc1	297	2	20.3831	0.09027	20.4856	0.0619885	1.07369	0.0494948	>0.05
Q6IFW6	K1C10_RAT	Keratin, type I cytoskeletal 10 (Cytokeratin-10) (CK-10) (Keratin-10) (K10) (Type I keratin Ka10)	Krt10 Ka10	526	3	18.9975	0.303711	19.185	0.389935	1.13875	0.447102	>0.05
Q6IMF3	K2C1_RAT	Keratin, type II cytoskeletal 1 (Cytokeratin-1) (CK-1) (Keratin-1) (K1) (Type-II keratin Kb1)	Krt1 Kb1	625	5	25.9005	0.0801689	25.8872	0.0604935	0.990791	0.0420588	>0.05
Q6IMZ3	Q6IMZ3_RAT	Annexin	Anxa6 rCG_33456	673	22	27.1317	0.026553	27.0739	0.0386243	0.960751	0.0268777	>0.05
Q6J4I0	PPR1B_RAT	Protein phosphatase 1 regulatory subunit 1B (DARPP-32) (Dopamine- and cAMP-regulated neuronal phosphoprotein)	Ppp1r1b	205	9	28.8255	0.0165185	28.7929	0.0279166	0.977622	0.0192398	>0.05
Q6JE36	NDRG1_RAT	Protein NDRG1 (N-myc downstream-regulated gene 1 protein) (Protein Ndr1)	Ndrg1 Ndr1	394	3	22.1322	0.0354944	22.1718	0.0468142	1.0278	0.0336333	>0.05
Q6JP77	AKA7G_RAT	A-kinase anchor protein 7 isoforms delta and gamma (AKAP-7 isoforms delta and gamma) (A-kinase anchor protein 18) (AKAP-18) (Protein kinase A-anchoring protein 7 isoforms delta and gamma) (PRKA7 isoforms delta and gamma)	Akap7 Akap18	353	3	21.0581	0.0611806	21.0298	0.0597703	0.980535	0.0431393	>0.05
Q6KC51	ABLM2_RAT	Actin-binding LIM protein 2 (abLIM-2) (Actin-binding LIM protein family member 2)	Ablim2	612	5	25.6766	0.0633983	25.675	0.0651429	0.998849	0.0435167	>0.05
Q6MG49	BAG6_RAT	Large proline-rich protein BAG6 (BCL2-associated athanogene 6) (HLA-B-associated transcript 3)	Bag6 Bat3	1146	3	22.2252	0.0982127	22.3097	0.110904	1.06033	0.0828905	>0.05
Q6MG60	DDAH2_RAT	N(G),N(G)-dimethylarginine dimethylaminohydrolase 2 (DDAH-2) (Dimethylarginine dimethylaminohydrolase 2) (EC 3.5.3.18) (DDAHII) (Dimethylargininase-2)	Ddah2	285	5	23.5346	0.0334568	23.5791	0.048328	1.0313	0.0360844	>0.05
Q6MG85	Q6MG85_RAT	1-acyl-sn-glycerol-3-phosphate acyltransferase (EC 2.3.1.51)	Agpat1 Ager Btnl6 Cyp21a1-ps Ng5 Rnf5 Stk19-ps Tnx rCG_38326	284	2	22.0352	0.0428027	22.0609	0.0325497	1.01797	0.0224763	>0.05
Q6P0K8	PLAK_RAT	Junction plakoglobin	Jup	745	3	23.8942	0.031011	23.9482	0.0431454	1.03817	0.0313155	>0.05
Q6P3V9	Q6P3V9_RAT	60S ribosomal protein L4 (RCG58071, isoform CRA_a) (Ribosomal protein L4)	Rpl4 rCG_58071	421	5	22.4054	0.0481965	22.4578	0.0519581	1.03695	0.0365153	>0.05
Q6P4Z9	CSN8_RAT	COP9 signalosome complex subunit 8 (SGN8) (Signalosome subunit 8) (COP9 homolog) (JAB1-containing signalosome subunit 8)	Cops8 Csn8	209	3	22.9116	0.0416863	22.862	0.043241	0.96619	0.0291803	>0.05
Q6P502	TCPG_RAT	T-complex protein 1 subunit gamma (TCP-1-gamma) (CCT-gamma)	Cct3	545	13	25.2111	0.0134018	25.221	0.0214088	1.00687	0.0149278	>0.05
Q6P503	Q6P503_RAT	ATPase, H+ transporting, V1 subunit D, isoform CRA_c (ATPase, H+ transporting, lysosomal V1 subunit D) (Protein Atp6v1d)	Atp6v1d rCG_61537	247	10	27.6006	0.0294582	27.5855	0.0374772	0.989583	0.0268507	>0.05
Q6P505	Q6P505_RAT	Proteasome subunit alpha type (EC 3.4.25.1)	Psma4	261	2	18.9852	0.125717	19.0142	0.215683	1.0203	0.186734	>0.05
Q6P6G9	Q6P6G9_RAT	Hnrpa1 protein	Hnrnpa1 Hnrpa1	313	4	22.1661	0.0481885	22.1166	0.045875	0.966247	0.0302978	>0.05
Q6P6Q2	K2C5_RAT	Keratin, type II cytoskeletal 5 (Cytokeratin-5) (CK-5) (Keratin-5) (K5) (Type-II keratin Kb5)	Krt5 Krt2-5	576	4	25.6555	0.0580928	25.6068	0.0502855	0.966789	0.0349195	>0.05
Q6P6Q5	Q6P6Q5_RAT	App protein	App	733	4	22.8171	0.140577	22.5701	0.153186	0.842685	0.0775	>0.05
Q6P6R2	DLDH_RAT	Dihydrolipoyl dehydrogenase, mitochondrial (EC 1.8.1.4) (Dihydrolipoamide dehydrogenase)	Dld	509	13	28.4379	0.024699	28.4481	0.0222485	1.00709	0.015505	>0.05
Q6P6T6	Q6P6T6_RAT	Cathepsin D (Cathepsin D, isoform CRA_c)	Ctsd rCG_47835	407	5	23.76	0.0274838	23.7876	0.0257596	1.01936	0.0186742	>0.05
Q6P6V0	G6PI_RAT	Glucose-6-phosphate isomerase (GPI) (EC 5.3.1.9) (Autocrine motility factor) (AMF) (Neuroleukin) (NLK) (Phosphoglucose isomerase) (PGI) (Phosphohexose isomerase) (PHI)	Gpi	558	25	29.4229	0.0148228	29.4353	0.0171865	1.0086	0.0119633	>0.05
Q6P747	HP1B3_RAT	Heterochromatin protein 1-binding protein 3	Hp1bp3	553	3	21.4665	0.0223985	21.435	0.034829	0.978416	0.0236535	>0.05
Q6P799	SYSC_RAT	Serine--tRNA ligase, cytoplasmic (EC 6.1.1.11) (Seryl-tRNA synthetase) (SerRS) (Seryl-tRNA(Ser/Sec) synthetase)	Sars Sars1	512	7	22.516	0.055467	22.5244	0.0474333	1.00585	0.03261	>0.05
Q6P7B0	SYWC_RAT	Tryptophan--tRNA ligase, cytoplasmic (EC 6.1.1.2) (Tryptophanyl-tRNA synthetase) (TrpRS) [Cleaved into: T1-TrpRS; T2-TrpRS]	Wars	481	8	23.2917	0.0311132	23.3008	0.036314	1.00633	0.0251746	>0.05
Q6P7Q4	LGUL_RAT	Lactoylglutathione lyase (EC 4.4.1.5) (Aldoketomutase) (Glyoxalase I) (Glx I) (Ketone-aldehyde mutase) (Methylglyoxalase) (S-D-lactoylglutathione methylglyoxal lyase)	Glo1	184	10	25.9958	0.0319577	25.9434	0.0314567	0.964267	0.0212811	>0.05
Q6P9U5	Q6P9U5_RAT	Ribosomal protein L9	Rpl9	192	3	21.6358	0.0486935	21.7497	0.0680649	1.08217	0.0545929	>0.05
Q6P9V1	Q6P9V1_RAT	Tetraspanin	Cd81 rCG_47614	236	4	23.5604	0.071817	23.749	0.0424947	1.13968	0.0331924	<0.05
Q6P9V9	TBA1B_RAT	Tubulin alpha-1B chain (Alpha-tubulin 2) (Tubulin alpha-2 chain)	Tuba1b Tuba2	451	30	33.8693	0.00708427	33.8643	0.00863176	0.996543	0.00591018	>0.05
Q6PCT3	TPD54_RAT	Tumor protein D54 (Tumor protein D52-like 2)	Tpd52l2	220	3	21.4397	0.0385657	21.4554	0.0450044	1.01092	0.030427	>0.05
Q6PCT9	Q6PCT9_RAT	Proteasome (Prosome, macropain) 26S subunit, non-ATPase, 6 (Proteasome (Prosome, macropain) 26S subunit, non-ATPase, 6, isoform CRA_a) (Protein Psmd6)	Psmd6 rCG_42172	389	3	21.1488	0.0380803	21.1122	0.0508852	0.974919	0.0334495	>0.05
Q6PCU2	VATE1_RAT	V-type proton ATPase subunit E 1 (V-ATPase subunit E 1) (Vacuolar proton pump subunit E 1)	Atp6v1e1	226	8	27.1535	0.0294387	27.1768	0.0395959	1.01627	0.0278915	>0.05
Q6PCU8	NDUV3_RAT	NADH dehydrogenase [ubiquinone] flavoprotein 3, mitochondrial (Complex I-9kD) (CI-9kD) (NADH-ubiquinone oxidoreductase 9 kDa subunit)	Ndufv3	108	4	24.1706	0.0448606	24.2144	0.0524958	1.03085	0.037474	>0.05
Q6PDU7	ATP5L_RAT	ATP synthase subunit g, mitochondrial (ATPase subunit g)	Atp5l	103	7	27.5406	0.0370903	27.5807	0.0293136	1.02818	0.0206	>0.05
Q6PEC0	AP4A_RAT	Bis(5'-nucleosyl)-tetraphosphatase [asymmetrical] (EC 3.6.1.17) (Diadenosine 5',5'''-P1,P4-tetraphosphate asymmetrical hydrolase) (Ap4A hydrolase) (Ap4Aase) (Diadenosine tetraphosphatase) (Nucleoside diphosphate-linked moiety X motif 2) (Nudix motif 2)	Nudt2	147	3	21.7149	0.0440122	21.7426	0.0416738	1.0194	0.0305982	>0.05
Q6PEC4	SKP1_RAT	S-phase kinase-associated protein 1 (Cyclin-A/CDK2-associated protein p19) (S-phase kinase-associated protein 1A) (p19A) (p19skp1)	Skp1 Skp1a	163	6	25.2508	0.0811854	25.359	0.0708984	1.07789	0.0516106	>0.05
Q6PEC5	Q6PEC5_RAT	Superoxide dismutase [Cu-Zn] (EC 1.15.1.1) (Fragment)	0	163	4	22.7786	0.0681453	22.7991	0.07165	1.0143	0.0481559	>0.05
Q6PST4	ATLA1_RAT	Atlastin-1 (EC 3.6.5.-) (Spastic paraplegia 3A homolog)	Atl1 Spg3a	558	12	24.6234	0.0329523	24.6145	0.0316809	0.993858	0.0220728	>0.05
Q6Q0N1	CNDP2_RAT	Cytosolic non-specific dipeptidase (EC 3.4.13.18) (CNDP dipeptidase 2)	Cndp2	475	7	24.2802	0.0248463	24.2763	0.0187582	0.997318	0.0130059	>0.05
Q6Q629	DPP10_RAT	Inactive dipeptidyl peptidase 10 (Dipeptidyl peptidase X) (DPP X) (Kv4 potassium channel auxiliary subunit)	Dpp10	796	7	22.3064	0.0381565	22.3712	0.0586988	1.04592	0.0444999	>0.05
Q6Q7Y5	GNA13_RAT	Guanine nucleotide-binding protein subunit alpha-13 (G alpha-13) (G-protein subunit alpha-13)	Gna13	377	3	21.254	0.0411587	21.2815	0.0564742	1.01925	0.0385965	>0.05
Q6QI09	Q6QI09_RAT	ATP synthase subunit gamma, mitochondrial (LRRGT00199)	Taf3 Atp5c1 LOC100360100	607	6	27.7125	0.0244766	27.7395	0.0264739	1.01889	0.0196033	>0.05
Q6QIX3	ZNT3_RAT	Zinc transporter 3 (ZnT-3) (Solute carrier family 30 member 3)	Slc30a3 Znt3	388	4	23.2736	0.0205265	23.2895	0.0302742	1.01106	0.0212315	>0.05
Q6RJR6	RTN3_RAT	Reticulon-3	Rtn3	940	13	26.4844	0.0386002	26.4254	0.019926	0.959936	0.0134063	>0.05
Q6RUV5	RAC1_RAT	Ras-related C3 botulinum toxin substrate 1 (p21-Rac1)	Rac1	192	8	27.6135	0.0455915	27.6646	0.0471243	1.03601	0.0340201	>0.05
Q6T487	Q6T487_RAT	Brain-specific alpha actinin 1 isoform	Actn1	914	45	28.5042	0.0150816	28.4789	0.0184127	0.982619	0.0122891	>0.05
Q6TXJ0	Q6TXJ0_RAT	40S ribosomal protein S8	LOC297756	229	3	23.2785	0.018397	23.2706	0.0296499	0.994559	0.0205439	>0.05
Q6UPE1	ETFD_RAT	Electron transfer flavoprotein-ubiquinone oxidoreductase, mitochondrial (ETF-QO) (ETF-ubiquinone oxidoreductase) (EC 1.5.5.1) (Electron-transferring-flavoprotein dehydrogenase) (ETF dehydrogenase)	Etfdh	616	6	23.1943	0.060463	23.322	0.0639446	1.09249	0.0501535	>0.05
Q6URK4	ROA3_RAT	Heterogeneous nuclear ribonucleoprotein A3 (hnRNP A3)	Hnrnpa3 Hnrpa3	379	9	25.8937	0.0395699	25.83	0.038586	0.956793	0.0257502	>0.05
Q6XD99	Q6XD99_RAT	Non-erythroid spectrin beta	Sptbn1 Spnb2	2358	103	30.1906	0.014354	30.1898	0.0130814	0.999409	0.00904001	>0.05
Q6XVN8	MLP3A_RAT	Microtubule-associated proteins 1A/1B light chain 3A (Autophagy-related protein LC3 A) (Autophagy-related ubiquitin-like modifier LC3 A) (MAP1 light chain 3-like protein 1) (MAP1A/MAP1B light chain 3 A) (MAP1A/MAP1B LC3 A) (Microtubule-associated protein 1 light chain 3 alpha)	Map1lc3a	121	3	24.3731	0.0316787	24.3468	0.0531863	0.981931	0.0376471	>0.05
Q71UE8	NEDD8_RAT	NEDD8 (Neddylin) (Ubiquitin-like protein NEDD8)	Nedd8	81	2	23.2725	0.0681723	23.174	0.0635123	0.934017	0.0411009	>0.05
Q71UF4	RBBP7_RAT	Histone-binding protein RBBP7 (Nucleosome-remodeling factor subunit RBAP46) (Retinoblastoma-binding protein 7) (RBBP-7)	Rbbp7	425	4	21.4381	0.0561127	21.4716	0.0374819	1.02347	0.0272649	>0.05
Q75Q39	TOM70_RAT	Mitochondrial import receptor subunit TOM70 (Mitochondrial precursor proteins import receptor) (Translocase of outer membrane 70 kDa subunit)	Tomm70a	610	19	27.3888	0.02834	27.3558	0.0369146	0.977406	0.0239387	>0.05
Q75Q41	TOM22_RAT	Mitochondrial import receptor subunit TOM22 homolog (rTOM22) (Translocase of outer membrane 22 kDa subunit homolog)	Tomm22 Tom22	142	3	22.1145	0.039351	22.1843	0.0379806	1.04957	0.0280968	>0.05
Q76EQ0	SRR_RAT	Serine racemase (EC 4.3.1.17) (EC 4.3.1.18) (EC 5.1.1.18) (D-serine ammonia-lyase) (D-serine dehydratase) (L-serine ammonia-lyase) (L-serine dehydratase)	Srr	333	4	21.7699	0.0490012	21.86	0.0495487	1.06448	0.0364748	>0.05
Q76GL9	Q76GL9_RAT	Amino acid transporter	Slc1a4 ASCT1 rCG_23218	529	2	22.1986	0.0459501	22.2083	0.0546276	1.00671	0.0374251	>0.05
Q76MJ6	Q76MJ6_RAT	Brain Y-box binding protein 1	Ybx1 rBYB1 Ybx1-ps3	322	2	19.6163	0.095154	19.7089	0.0840374	1.0663	0.0647341	>0.05
Q78P75	DYL2_RAT	Dynein light chain 2, cytoplasmic (Dynein light chain LC8-type 2)	Dynll2 Dlc2	89	5	26.349	0.0834762	26.2494	0.0700455	0.933251	0.041784	>0.05
Q792I0	LIN7C_RAT	Protein lin-7 homolog C (Lin-7C) (Mammalian lin-seven protein 3) (MALS-3) (Vertebrate lin-7 homolog 3) (Veli-3)	Lin7c Mals3 Veli3	197	5	22.6119	0.034257	22.5908	0.0447983	0.985457	0.0304703	>0.05
Q794E4	HNRPF_RAT	Heterogeneous nuclear ribonucleoprotein F (hnRNP F) [Cleaved into: Heterogeneous nuclear ribonucleoprotein F, N-terminally processed]	Hnrnpf Hnrpf	415	4	24.1664	0.0195248	24.1788	0.0158298	1.00863	0.0110286	>0.05
Q794F9	4F2_RAT	4F2 cell-surface antigen heavy chain (4F2hc) (Solute carrier family 3 member 2) (CD antigen CD98)	Slc3a2	527	9	25.3143	0.0301874	25.3135	0.0395413	0.99947	0.0272244	>0.05
Q7M0E3	DEST_RAT	Destrin (Actin-depolymerizing factor) (ADF)	Dstn	165	4	25.4978	0.0282869	25.5592	0.0287683	1.0435	0.0204025	>0.05
Q7TMC7	Q7TMC7_RAT	Ab2-417 (Cc1-8) (Signal recognition particle receptor subunit beta)	Tf Srprb	979	16	24.3356	0.0444744	24.3626	0.0376795	1.0189	0.026293	>0.05
Q7TP11	Q7TP11_RAT	6-phosphogluconate dehydrogenase, decarboxylating (EC 1.1.1.44)	Pgd	1089	4	24.201	0.0206787	24.1687	0.0280042	0.977908	0.018555	>0.05
Q7TP47	HNRPQ_RAT	Heterogeneous nuclear ribonucleoprotein Q (hnRNP Q) (Liver regeneration-related protein LRRG077) (Synaptotagmin-binding, cytoplasmic RNA-interacting protein)	Syncrip Hnrpq Ab2-339	533	7	23.369	0.0345213	23.3539	0.0283272	0.989633	0.0192774	>0.05
Q7TP61	Q7TP61_RAT	Ab2-076	Acat2 Acat3	963	3	23.5887	0.0305727	23.6101	0.0284016	1.01501	0.0196315	>0.05
Q7TP75	Q7TP75_RAT	Aa2-066	Ahsg	553	5	22.7879	0.086537	22.9382	0.0772643	1.10975	0.0609719	>0.05
Q7TP78	Q7TP78_RAT	Aa2-258 (Protein Ndufa8)	Ndufa8	189	3	21.5407	0.0518219	21.6591	0.0566358	1.08555	0.0424425	>0.05
Q7TPB1	TCPD_RAT	T-complex protein 1 subunit delta (TCP-1-delta) (CCT-delta)	Cct4	539	14	25.3581	0.0332578	25.3905	0.0396795	1.0227	0.0286172	>0.05
Q7TQ16	QCR8_RAT	Cytochrome b-c1 complex subunit 8 (Complex III subunit 8) (Complex III subunit VIII) (Low molecular mass ubiquinone-binding protein) (Ubiquinol-cytochrome c reductase complex 9.5 kDa protein) (Ubiquinol-cytochrome c reductase complex ubiquinone-binding protein QP-C)	Uqcrq Qpc	82	2	21.6034	0.100906	21.6171	0.162114	1.00949	0.112156	>0.05
Q7TQ85	Q7TQ85_RAT	Ac1164 (Protein Pdhx)	Pdhx LOC311254	539	5	23.7532	0.102487	23.8833	0.109775	1.09435	0.0830903	>0.05
Q7TQ90	Q7TQ90_RAT	Ac1002	Adh4	872	5	24.0579	0.0349812	24.0518	0.0447737	0.995786	0.0311158	>0.05
Q7TT49	MRCKB_RAT	Serine/threonine-protein kinase MRCK beta (EC 2.7.11.1) (CDC42-binding protein kinase beta) (DMPK-like beta) (Myotonic dystrophy kinase-related CDC42-binding kinase beta) (MRCK beta) (Myotonic dystrophy protein kinase-like beta)	Cdc42bpb	1713	2	20.0485	0.0851331	20.111	0.0735121	1.04425	0.0530901	>0.05
Q7TT74	Q7TT74_RAT	Chloride channel protein (Fragment)	0	964	3	21.5291	0.0587773	21.6172	0.0385018	1.06295	0.0282877	>0.05
Q80U96	XPO1_RAT	Exportin-1 (Exp1) (Chromosome region maintenance 1 protein homolog)	Xpo1 Crm1	1071	4	21.6631	0.0375925	21.7296	0.0431126	1.0472	0.0321267	>0.05
Q80W89	NDUAB_RAT	NADH dehydrogenase [ubiquinone] 1 alpha subcomplex subunit 11 (Complex I-B14.7) (CI-B14.7) (NADH-ubiquinone oxidoreductase subunit B14.7)	Ndufa11	141	3	23.5253	0.0506815	23.6173	0.0421449	1.06581	0.0314364	>0.05
Q80ZA5	S4A10_RAT	Sodium-driven chloride bicarbonate exchanger (Solute carrier family 4 member 10)	Slc4a10 Ncbe	1117	3	20.8945	0.087596	20.897	0.0943062	1.00173	0.0658265	>0.05
Q810C5	Q810C5_RAT	Diacylglycerol kinase (DAG kinase) (EC 2.7.1.107)	Dgki rDGKi-1	1050	3	21.2097	0.0912545	21.3651	0.0767791	1.11376	0.060888	>0.05
Q810H6	DISC1_RAT	Disrupted in schizophrenia 1 homolog	Disc1	846	2	22.9288	0.124145	22.9665	0.0983522	1.02646	0.0673987	>0.05
Q812D1	PSIP1_RAT	PC4 and SFRS1-interacting protein (Lens epithelium-derived growth factor)	Psip1 Ledgf	528	3	21.6473	0.0529046	21.5714	0.0619316	0.948738	0.0404587	>0.05
Q812E9	GPM6A_RAT	Neuronal membrane glycoprotein M6-a (M6a)	Gpm6a m6a	278	6	29.0655	0.0709745	28.8515	0.164901	0.862131	0.0942069	>0.05
Q8CFD0	SFXN5_RAT	Sideroflexin-5 (Tricarboxylate carrier BBG-TCC)	Sfxn5	342	4	23.255	0.04885	23.2912	0.0629951	1.02543	0.0450707	>0.05
Q8CFN2	CDC42_RAT	Cell division control protein 42 homolog	Cdc42	191	7	25.104	0.0447493	25.1841	0.0267165	1.05709	0.0195154	>0.05
Q8CG45	ARK72_RAT	Aflatoxin B1 aldehyde reductase member 2 (rAFAR2) (EC 1.1.1.n11) (Succinic semialdehyde reductase) (SSA reductase)	Akr7a2 Afar2 Aiar	367	2	20.5147	0.048811	20.4575	0.0781365	0.961146	0.0484847	>0.05
Q8CGU4	AGAP2_RAT	Arf-GAP with GTPase, ANK repeat and PH domain-containing protein 2 (AGAP-2) (Centaurin-gamma-1) (Cnt-g1) (Phosphatidylinositol 3-kinase enhancer) (PIKE)	Agap2 Centg1	1186	8	23.3288	0.102376	23.4462	0.112787	1.08479	0.0845635	>0.05
Q8K1Q0	NMT1_RAT	Glycylpeptide N-tetradecanoyltransferase 1 (EC 2.3.1.97) (Myristoyl-CoA:protein N-myristoyltransferase 1) (NMT 1) (Type I N-myristoyltransferase) (Peptide N-myristoyltransferase 1)	Nmt1	496	2	19.4112	0.0491087	19.4196	0.0430536	1.00587	0.0301191	>0.05
Q8K3M6	ERC2_RAT	ERC protein 2 (CAZ-associated structural protein 1) (CAST1) (Cast) (Cytomatrix protein p110)	Erc2 Cast1 Cmbp	957	3	20.772	0.0731514	20.779	0.0656408	1.00487	0.0444308	>0.05
Q8K3X8	HSBP1_RAT	Heat shock factor-binding protein 1	Hsbp1	76	3	23.1634	0.0313179	23.1782	0.0126339	1.01029	0.00882587	>0.05
Q8K4M9	OSBL1_RAT	Oxysterol-binding protein-related protein 1 (ORP-1) (OSBP-related protein 1)	Osbpl1a Orp1	950	3	21.344	0.0259883	21.4071	0.0278791	1.04472	0.0204598	>0.05
Q8K4Y5	LGI1_RAT	Leucine-rich glioma-inactivated protein 1	Lgi1	557	7	23.817	0.0107507	23.8095	0.0253853	0.994825	0.0175658	>0.05
Q8R1R5	C99L2_RAT	CD99 antigen-like protein 2 (MIC2-like protein 1) (Rhombencephalic expression protein 40 kDa) (Protein rhombex-40) (CD antigen CD99)	Cd99l2 Mic2l1 Rhombex40	246	2	21.5574	0.0329726	21.5913	0.0348966	1.02379	0.0241715	>0.05
Q8R2H0	Q8R2H0_RAT	ATPase, H+ transporting, V1 subunit G isoform 2 (ATPase, H+ transporting, V1 subunit G isoform 2, isoform CRA_b) (Protein Atp6v1g2) (Vacuolar ATPase NG38)	Atp6v1g2 Aif1 Bat1a Cdk2ap1-ps2 Cdk2ap1-ps3 Cdk2ap1-ps4 Cdk2ap1-ps5 Cdk2ap1-ps6 E230034O05Rik LOC224733l-3 LOC224733l-4 LOC224733l-5 LOC224733l-6 LOC224733l-7 LOC224733l-8 Lst1 RT1-CE12 RT1-CE3 RT1-CE5 RT1-CE6 RT1-CE8 RT1-CE9 Sacm2l-ps3 Sacm2l-ps4 Sacm2l-ps5 Sacm2l-ps6 Sacm2l-ps7 Tnf rCG_38311	118	5	24.0919	0.168422	23.8736	0.179259	0.859612	0.103046	>0.05
Q8R431	MGLL_RAT	Monoglyceride lipase (MGL) (EC 3.1.1.23) (Monoacylglycerol lipase) (MAGL)	Mgll Mgl2	303	4	22.6357	0.0410743	22.6298	0.0413121	0.995901	0.0263561	>0.05
Q8R490	Q8R490_RAT	Cadherin 13 (Protein Cdh13) (T-cadherin)	Cdh13 rCG_51389	714	3	22.8818	0.0490075	22.9395	0.0659184	1.04085	0.0503229	>0.05
Q8R491	EHD3_RAT	EH domain-containing protein 3	Ehd3 Ehd2	535	9	24.0998	0.0398539	24.1684	0.0551194	1.04867	0.0405343	>0.05
Q8R500	MFN2_RAT	Mitofusin-2 (EC 3.6.5.-) (Mitochondrial transmembrane GTPase FZO1A) (Protein HSG) (Transmembrane GTPase MFN2)	Mfn2 Fzo1a	757	2	20.4981	0.0434807	20.4125	0.0499076	0.942409	0.0334509	>0.05
Q8VBU2	NDRG2_RAT	Protein NDRG2 (Antidepressant-related protein ADRG123) (N-myc downstream-regulated gene 2 protein) (NDRG1-related protein)	Ndrg2	371	13	26.3401	0.0170407	26.3768	0.0253391	1.02576	0.0179582	>0.05
Q8VD52	PLPP_RAT	Pyridoxal phosphate phosphatase (PLP phosphatase) (EC 3.1.3.3) (EC 3.1.3.74) (Chronophin) (Reg I-binding protein 1)	Pdxp Cin Plp Plpp Rbp1	309	7	25.2726	0.0341102	25.3139	0.0214483	1.02906	0.0154629	>0.05
Q8VHK2	CSKI1_RAT	Caskin-1 (CASK-interacting protein 1)	Caskin1	1430	11	22.6874	0.0273565	22.69	0.0425986	1.00186	0.0308108	>0.05
Q8VHW5	CCG8_RAT	Voltage-dependent calcium channel gamma-8 subunit (Neuronal voltage-gated calcium channel gamma-8 subunit) (Transmembrane AMPAR regulatory protein gamma-8) (TARP gamma-8)	Cacng8	421	2	22.0635	0.0307576	22.0796	0.0474629	1.0112	0.0351301	>0.05
Q8VI04	ASGL1_RAT	Isoaspartyl peptidase/L-asparaginase (EC 3.4.19.5) (EC 3.5.1.1) (Asparaginase-like protein 1) (Asparaginase-like sperm autoantigen) (Beta-aspartyl-peptidase) (Glial asparaginase) (Isoaspartyl dipeptidase) (L-asparagine amidohydrolase) [Cleaved into: Isoaspartyl peptidase/L-asparaginase alpha chain; Isoaspartyl peptidase/L-asparaginase beta chain]	Asrgl1 Alp Gliap Hiob	333	8	24.9713	0.0446251	24.9701	0.0367135	0.99913	0.025723	>0.05
Q8VII6	CTL1_RAT	Choline transporter-like protein 1 (Solute carrier family 44 member 1) (CD antigen CD92)	Slc44a1 Cd92 Cdw92 Ctl1	656	5	21.4768	0.0786842	21.596	0.038441	1.08613	0.0275401	>0.05
Q8VIJ5	OGA_RAT	Protein O-GlcNAcase (OGA) (EC 3.2.1.169) (Beta-N-acetylhexosaminidase) (Beta-hexosaminidase) (Bifunctional protein NCOAT) (Meningioma-expressed antigen 5) (N-acetyl-beta-D-glucosaminidase) (EC 3.2.1.52) (N-acetyl-beta-glucosaminidase)	Mgea5 Hexc Mea5	916	3	20.7628	0.0426312	20.7506	0.0478923	0.991586	0.0328662	>0.05
Q8VIL3	ZWINT_RAT	ZW10 interactor (SNAP25-interacting protein 30) (Scoilin) (ZW10-interacting protein 1) (Zwint-1)	Zwint Sip30	266	4	21.5338	0.0512089	21.6009	0.0680913	1.04761	0.0501316	>0.05
Q91XV6	FXYD6_RAT	FXYD domain-containing ion transport regulator 6 (Phosphohippolin) (Vascular endothelial cell-specific protein 6) (VESP6)	Fxyd6 Php	94	2	23.2651	0.0933082	23.1354	0.140758	0.914009	0.0766436	>0.05
Q91Y78	UCHL3_RAT	Ubiquitin carboxyl-terminal hydrolase isozyme L3 (UCH-L3) (EC 3.4.19.12) (Ubiquitin thioesterase L3)	Uchl3	230	7	24.0307	0.0416095	24.0758	0.027511	1.03174	0.0193185	>0.05
Q91Y81	SEPT2_RAT	Septin-2 (Vascular endothelial cell specific protein 11)	Sept2 Vesp11	361	9	24.1945	0.0330895	24.218	0.0433773	1.01644	0.0294692	>0.05
Q91ZN1	COR1A_RAT	Coronin-1A (Coronin-like protein A) (Clipin-A) (Tryptophan aspartate-containing coat protein) (TACO)	Coro1a Coro1	461	8	26.0252	0.0390878	26.0865	0.0377341	1.04337	0.0279223	>0.05
Q920J4	TXNL1_RAT	Thioredoxin-like protein 1 (Thioredoxin-related protein)	Txnl1 Trp	289	4	23.2101	0.0484846	23.1237	0.0486801	0.941852	0.0311252	>0.05
Q920L2	SDHA_RAT	Succinate dehydrogenase [ubiquinone] flavoprotein subunit, mitochondrial (EC 1.3.5.1) (Flavoprotein subunit of complex II) (Fp)	Sdha	656	20	27.266	0.022221	27.2738	0.0236644	1.00543	0.0162626	>0.05
Q920Q0	PALM_RAT	Paralemmin-1 (Paralemmin)	Palm	383	12	25.1622	0.0277183	25.1561	0.0363326	0.99579	0.0255778	>0.05
Q923W4	HDGR3_RAT	Hepatoma-derived growth factor-related protein 3 (HRP-3)	Hdgfrp3 Hrp3	202	2	21.9567	0.0347886	21.9599	0.0607161	1.00222	0.0421055	>0.05
Q924N5	ACBG1_RAT	Long-chain-fatty-acid--CoA ligase ACSBG1 (EC 6.2.1.3) (Acyl-CoA synthetase bubblegum family member 1) (Gonadotropin-regulated long chain acyl CoA synthetase) (GR-LACS)	Acsbg1 Grlacs	721	8	21.5747	0.0955138	21.7003	0.0943898	1.09099	0.0715046	>0.05
Q924S5	LONM_RAT	Lon protease homolog, mitochondrial (EC 3.4.21.-) (Lon protease-like protein) (LONP) (Mitochondrial ATP-dependent protease Lon) (Serine protease 15)	Lonp1 Lon Prss15	950	8	22.9775	0.0506035	22.9648	0.0566309	0.991276	0.0399279	>0.05
Q99068	AMRP_RAT	Alpha-2-macroglobulin receptor-associated protein (Alpha-2-MRAP) (Gp330-binding 45 kDa protein) (Low density lipoprotein receptor-related protein-associated protein 1) (RAP)	Lrpap1	360	2	21.9245	0.0425972	21.8892	0.0615066	0.975841	0.0409221	>0.05
Q99JD4	CLAP2_RAT	CLIP-associating protein 2 (Cytoplasmic linker-associated protein 2)	Clasp2	1286	11	23.1318	0.0518917	23.2378	0.0442477	1.07624	0.0341774	>0.05
Q99JD5	Q99JD5_RAT	Branched-chain-amino-acid aminotransferase (EC 2.6.1.42)	Bcatc Bcat1 rCG_29894	399	6	22.6555	0.043383	22.6799	0.0550123	1.01708	0.0398733	>0.05
Q99MC0	PP14A_RAT	Protein phosphatase 1 regulatory subunit 14A (17 kDa PKC-potentiated inhibitory protein of PP1) (Protein kinase C-potentiated inhibitor protein of 17 kDa) (CPI-17)	Ppp1r14a Cpi Cpi17	147	2	21.0858	0.143922	21.2321	0.104892	1.10674	0.0822675	>0.05
Q99ML5	PCYOX_RAT	Prenylcysteine oxidase (EC 1.8.3.5) (Chloride ion pump-associated 55 kDa protein)	Pcyox1 Clp55	504	3	22.5254	0.0534632	22.6765	0.0597458	1.11042	0.047774	>0.05
Q99MZ8	LASP1_RAT	LIM and SH3 domain protein 1 (LASP-1)	Lasp1	263	5	24.362	0.0373764	24.3129	0.0394354	0.966532	0.0266532	>0.05
Q99NA5	IDH3A_RAT	Isocitrate dehydrogenase [NAD] subunit alpha, mitochondrial (EC 1.1.1.41) (Isocitric dehydrogenase subunit alpha) (NAD(+)-specific ICDH subunit alpha)	Idh3a	366	16	28.1593	0.0165185	28.1538	0.0147161	0.996163	0.0101255	>0.05
Q99NI1	Q99NI1_RAT	Nucleoside diphosphate kinase (EC 2.7.4.6)	Nme3	169	2	20.4248	0.0376147	20.3878	0.0494691	0.974681	0.0328057	>0.05
Q99P34	Q99P34_RAT	Protein Syt7 (Synaptotagmin VII, isoform CRA_e) (Synaptotagmin VIId)	Syt7 SytVII rCG_48133	611	5	21.9551	0.0585395	21.9782	0.0593155	1.01612	0.0437585	>0.05
Q99PD4	ARC1A_RAT	Actin-related protein 2/3 complex subunit 1A	Arpc1a	370	8	23.1881	0.0603387	23.2005	0.0689889	1.0086	0.0456301	>0.05
Q99PF5	FUBP2_RAT	Far upstream element-binding protein 2 (FUSE-binding protein 2) (KH type-splicing regulatory protein) (KSRP) (MAP2 RNA trans-acting protein 1) (MARTA1)	Khsrp Fubp2	721	7	23.0586	0.0205476	23.0256	0.0292368	0.977383	0.020016	>0.05
Q9EPC6	PROF2_RAT	Profilin-2 (Profilin II)	Pfn2	140	3	25.9129	0.0350885	25.9567	0.0667853	1.03086	0.0489928	>0.05
Q9EPH8	PABP1_RAT	Polyadenylate-binding protein 1 (PABP-1) (Poly(A)-binding protein 1)	Pabpc1 Pabp1	636	7	23.4092	0.0244889	23.4308	0.0336861	1.01507	0.0242119	>0.05
Q9EQS0	TALDO_RAT	Transaldolase (EC 2.2.1.2)	Taldo1	337	6	23.9244	0.0301191	24.0147	0.0596036	1.06455	0.0454324	>0.05
Q9EQX9	UBE2N_RAT	Ubiquitin-conjugating enzyme E2 N (EC 6.3.2.19) (Bendless-like ubiquitin-conjugating enzyme) (Ubiquitin carrier protein N) (Ubiquitin-protein ligase N)	Ube2n	152	6	25.588	0.0402627	25.5593	0.0518346	0.980333	0.0345165	>0.05
Q9ER34	ACON_RAT	Aconitate hydratase, mitochondrial (Aconitase) (EC 4.2.1.3) (Citrate hydro-lyase)	Aco2	780	37	30.514	0.0168036	30.4974	0.0125879	0.988546	0.00863643	>0.05
Q9ERB4	CSPG2_RAT	Versican core protein (Chondroitin sulfate proteoglycan core protein 2) (Chondroitin sulfate proteoglycan 2) (Glial hyaluronate-binding protein) (GHAP) (Large fibroblast proteoglycan) (PG-M) (Fragments)	Vcan Cspg2	2738	9	23.4538	0.0373203	23.4848	0.0482519	1.0217	0.0361208	>0.05
Q9ERH3	WDR7_RAT	WD repeat-containing protein 7 (TGF-beta resistance-associated protein TRAG)	Wdr7 Trag	1488	12	24.0614	0.0480708	24.0645	0.0493202	1.00211	0.0347398	>0.05
Q9ERQ6	CSPG5_RAT	Chondroitin sulfate proteoglycan 5 (Acidic leucine-rich EGF-like domain-containing brain protein) (Neuroglycan C)	Cspg5 Caleb Ngc	571	3	21.1813	0.0567712	21.1335	0.0681606	0.967416	0.046439	>0.05
Q9ESB5	NECA1_RAT	N-terminal EF-hand calcium-binding protein 1 (EF-hand calcium-binding protein 1) (Neuronal calcium-binding protein 1) (Synaptotagmin-interacting protein 1) (Stip-1)	Necab1 Efcbp1 Stip	352	3	20.6925	0.0596979	20.7852	0.0780278	1.06634	0.0585633	>0.05
Q9EST6	AN32B_RAT	Acidic leucine-rich nuclear phosphoprotein 32 family member B (Proliferation-related acidic leucine-rich protein PAL31)	Anp32b Pal31	272	2	20.7727	0.0153195	20.7276	0.0420826	0.969225	0.028443	>0.05
Q9JHL4	DBNL_RAT	Drebrin-like protein (Actin-binding protein 1) (Abp1) (SH3 domain-containing protein 7)	Dbnl Sh3p7	436	9	24.4517	0.02204	24.4635	0.026752	1.0082	0.0191187	>0.05
Q9JHU0	DPYL5_RAT	Dihydropyrimidinase-related protein 5 (DRP-5) (UNC33-like phosphoprotein 6) (ULIP-6)	Dpysl5 Ulip6	564	19	27.7285	0.0165802	27.7139	0.0185769	0.98993	0.0129661	>0.05
Q9JHY2	SFXN3_RAT	Sideroflexin-3	Sfxn3	321	8	25.5507	0.032596	25.5708	0.0321109	1.01398	0.0221141	>0.05
Q9JI66	S4A4_RAT	Electrogenic sodium bicarbonate cotransporter 1 (Sodium bicarbonate cotransporter) (NBC-like protein) (Na(+)/HCO3(-) cotransporter) (Solute carrier family 4 member 4)	Slc4a4 Nbc Nbc1 Nbce1 Rnbc1	1079	8	23.45	0.0264981	23.4741	0.0257659	1.01687	0.0182973	>0.05
Q9JIX3	FHIT_RAT	Bis(5'-adenosyl)-triphosphatase (EC 3.6.1.29) (AP3A hydrolase) (AP3Aase) (Diadenosine 5',5'''-P1,P3-triphosphate hydrolase) (Dinucleosidetriphosphatase) (Fragile histidine triad protein)	Fhit	150	2	20.2533	0.119005	20.1004	0.0564818	0.899426	0.0349171	>0.05
Q9JJ19	NHRF1_RAT	Na(+)/H(+) exchange regulatory cofactor NHE-RF1 (NHERF-1) (Ezrin-radixin-moesin-binding phosphoprotein 50) (EBP50) (Regulatory cofactor of Na(+)/H(+) exchanger) (Sodium-hydrogen exchanger regulatory factor 1) (Solute carrier family 9 isoform A3 regulatory factor 1)	Slc9a3r1 Nherf Nherf1	356	3	22.1298	0.0349722	22.1711	0.0327021	1.02904	0.0232385	>0.05
Q9JJ50	HGS_RAT	Hepatocyte growth factor-regulated tyrosine kinase substrate (SNAP-25-interacting protein Hrs-2)	Hgs Hrs Hrs2	776	2	20.9942	0.0379546	21.0533	0.0424449	1.04183	0.0299126	>0.05
Q9JJ54	HNRPD_RAT	Heterogeneous nuclear ribonucleoprotein D0 (hnRNP D0) (AU-rich element RNA-binding protein 1)	Hnrnpd Auf1 Hnrpd	353	2	24.6179	0.042266	24.615	0.0517899	0.997968	0.0345499	>0.05
Q9JJM9	SEPT5_RAT	Septin-5 (Cell division control-related protein 1) (CDCrel-1) (Peanut-like protein 1)	Sept5 Pnutl1	369	14	27.3316	0.0235002	27.3415	0.0187788	1.00689	0.0133047	>0.05
Q9JK11	RTN4_RAT	Reticulon-4 (Foocen) (Glut4 vesicle 20 kDa protein) (Neurite outgrowth inhibitor) (Nogo protein)	Rtn4 Nogo	1163	17	27.4142	0.196675	27.0916	0.144681	0.799625	0.0829375	>0.05
Q9JK71	MAGI3_RAT	Membrane-associated guanylate kinase, WW and PDZ domain-containing protein 3 (Membrane-associated guanylate kinase inverted 3) (MAGI-3) (Scaffolding-like protein)	Magi3 Slipr	1470	2	20.9774	0.0529242	20.9793	0.0525929	1.00131	0.0364833	>0.05
Q9JKB7	Q9JKB7_RAT	Guanine deaminase (Guanine deaminase, isoform CRA_b)	Gda rCG_47258	454	19	27.3005	0.0233168	27.3256	0.0216352	1.0176	0.0156473	>0.05
Q9JKS6	PCLO_RAT	Protein piccolo (Aczonin) (Multidomain presynaptic cytomatrix protein)	Pclo	5085	19	25.1977	0.056865	25.2187	0.0651786	1.01464	0.0466716	>0.05
Q9JLJ3	AL9A1_RAT	4-trimethylaminobutyraldehyde dehydrogenase (TMABADH) (EC 1.2.1.47) (Aldehyde dehydrogenase family 9 member A1) (EC 1.2.1.3)	Aldh9a1	494	3	22.088	0.0323799	22.0482	0.0358914	0.972771	0.0244079	>0.05
Q9JLU4	SHAN3_RAT	SH3 and multiple ankyrin repeat domains protein 3 (Shank3) (Proline-rich synapse-associated protein 2) (ProSAP2) (SPANK-2)	Shank3 Prosap2	1740	21	25.0104	0.0316722	25.0315	0.0333992	1.01469	0.0238854	>0.05
Q9QUH6	SYGP1_RAT	Ras/Rap GTPase-activating protein SynGAP (Neuronal RasGAP) (Synaptic Ras GTPase-activating protein 1) (Synaptic Ras-GAP 1) (p135 SynGAP)	Syngap1	1308	20	26.1183	0.0243997	26.1495	0.0158795	1.02187	0.0112591	>0.05
Q9QUL6	NSF_RAT	Vesicle-fusing ATPase (EC 3.6.4.6) (N-ethylmaleimide-sensitive fusion protein) (NEM-sensitive fusion protein) (Vesicular-fusion protein NSF)	Nsf Erg1	744	47	29.8912	0.019625	29.907	0.0180452	1.01103	0.0127437	>0.05
Q9QUR2	DCTN4_RAT	Dynactin subunit 4 (Dynactin subunit p62)	Dctn4	467	3	21.1961	0.0401372	21.2385	0.0332561	1.0298	0.0240929	>0.05
Q9QVC8	FKBP4_RAT	Peptidyl-prolyl cis-trans isomerase FKBP4 (PPIase FKBP4) (EC 5.2.1.8) (52 kDa FK506-binding protein) (52 kDa FKBP) (FKBP-52) (59 kDa immunophilin) (p59) (FK506-binding protein 4) (FKBP-4) (FKBP59) (HSP-binding immunophilin) (HBI) (Immunophilin FKBP52) (Rotamase) [Cleaved into: Peptidyl-prolyl cis-trans isomerase FKBP4, N-terminally processed]	Fkbp4 Fkbp52	458	3	19.7625	0.0683682	19.7348	0.087339	0.980924	0.0586267	>0.05
Q9QX69	LANC1_RAT	LanC-like protein 1 (40 kDa erythrocyte membrane protein) (p40)	Lancl1 Gpr69a	399	4	23.5603	0.118367	23.5505	0.118316	0.993231	0.0725769	>0.05
Q9QX74	SHAN2_RAT	SH3 and multiple ankyrin repeat domains protein 2 (Shank2) (Cortactin-binding protein 1) (CortBP1) (GKAP/SAPAP-interacting protein) (Proline-rich synapse-associated protein 1) (ProSAP1) (SPANK-3)	Shank2 Cortbp1	1474	2	19.0213	0.0783236	19.2173	0.120706	1.1455	0.100511	>0.05
Q9QXG3	Q9QXG3_RAT	Syntaxin 1A	Stx1a	288	15	27.9329	0.0220444	27.8841	0.03027	0.9668	0.0201788	>0.05
Q9QXQ0	ACTN4_RAT	Alpha-actinin-4 (Non-muscle alpha-actinin 4)	Actn4	911	31	27.8606	0.0198628	27.8244	0.0225613	0.975241	0.0150732	>0.05
Q9QXU8	DC1L1_RAT	Cytoplasmic dynein 1 light intermediate chain 1 (Dynein light chain A) (DLC-A) (Dynein light intermediate chain 1, cytosolic)	Dync1li1 Dncli1	523	9	24.2033	0.0359898	24.2413	0.0400815	1.02673	0.0287004	>0.05
Q9QXU9	PCSK1_RAT	ProSAAS (Proprotein convertase subtilisin/kexin type 1 inhibitor) (Proprotein convertase 1 inhibitor) (pro-SAAS) [Cleaved into: KEP; Big SAAS (b-SAAS); Little SAAS (l-SAAS); Big PEN-LEN (b-PEN-LEN) (SAAS CT(1-49)); PEN; PEN-20; Little LEN (l-LEN); Big LEN (b-LEN) (SAAS CT(25-40))]	Pcsk1n	260	4	25.0796	0.0211168	25.0508	0.0247179	0.980216	0.0167724	>0.05
Q9QXY2	SRCN1_RAT	SRC kinase signaling inhibitor 1 (SNAP-25-interacting protein) (SNIP) (p130Cas-associated protein) (p140Cap)	Srcin1 P140 Snip	1197	19	25.4866	0.0292927	25.5189	0.0114415	1.02263	0.00810083	>0.05
Q9QYF3	MYO5A_RAT	Unconventional myosin-Va (Dilute myosin heavy chain, non-muscle)	Myo5a	1828	23	26.0647	0.0159404	26.0649	0.0193364	1.00014	0.0137329	>0.05
Q9QYJ6	PDE10_RAT	cAMP and cAMP-inhibited cGMP 3',5'-cyclic phosphodiesterase 10A (EC 3.1.4.17) (EC 3.1.4.35)	Pde10a	794	12	24.3322	0.0343997	24.441	0.0266415	1.07833	0.0198322	<0.05
Q9QYL8	LYPA2_RAT	Acyl-protein thioesterase 2 (APT-2) (EC 3.1.2.-) (Lysophospholipase 2) (Lysophospholipase II) (LPL-II) (LysoPLA II)	Lypla2	231	3	21.0639	0.0539007	21.0505	0.0643863	0.990803	0.042865	>0.05
Q9QYU2	EFTS_RAT	Elongation factor Ts, mitochondrial (EF-Ts) (EF-TsMt) (2A3-2)	Tsfm	324	2	20.5688	0.0800453	20.5788	0.0963148	1.00694	0.0754946	>0.05
Q9QYU4	CRYM_RAT	Ketimine reductase mu-crystallin (EC 1.5.1.25) (CDK108) (NADP-regulated thyroid-hormone-binding protein)	Crym	313	12	27.2094	0.0458372	27.2842	0.0368517	1.05323	0.0272249	>0.05
Q9QYW3	PHOCN_RAT	MOB-like protein phocein (Class II mMOB1) (Mob1 homolog 3) (Mob3) (Mps one binder kinase activator-like 3) (Phocein) (Preimplantation protein 3)	Mob4 Mob3 Mobkl1 Phocn Prei3	225	2	22.3702	0.0529581	22.3652	0.0568355	0.996565	0.0429956	>0.05
Q9QZA2	PDC6I_RAT	Programmed cell death 6-interacting protein (ALG-2-interacting protein 1)	Pdcd6ip Aip1	873	6	22.5656	0.0480413	22.5562	0.0483094	0.993546	0.0329059	>0.05
Q9QZM5	ABI1_RAT	Abl interactor 1 (Abelson interactor 1) (Abi-1) (Eps8 SH3 domain-binding protein) (Eps8-binding protein) (e3B1)	Abi1	476	4	21.7225	0.0569341	21.8035	0.0747387	1.05771	0.0566955	>0.05
Q9R063	PRDX5_RAT	Peroxiredoxin-5, mitochondrial (EC 1.11.1.15) (Antioxidant enzyme B166) (AOEB166) (PLP) (Peroxiredoxin V) (Prx-V) (Peroxisomal antioxidant enzyme) (Thioredoxin peroxidase PMP20) (Thioredoxin reductase)	Prdx5	213	12	28.1555	0.0350298	28.2113	0.0236855	1.0394	0.0169868	>0.05
Q9R1T5	ACY2_RAT	Aspartoacylase (EC 3.5.1.15) (Aminoacylase-2) (ACY-2)	Aspa	312	2	21.9219	0.0475448	21.8759	0.0356145	0.968619	0.0242113	>0.05
Q9R1Z0	VDAC3_RAT	Voltage-dependent anion-selective channel protein 3 (VDAC-3) (rVDAC3) (Outer mitochondrial membrane protein porin 3)	Vdac3	283	7	27.2772	0.0465428	27.2595	0.06107	0.987814	0.0427389	>0.05
Q9WTP0	E41L1_RAT	Band 4.1-like protein 1 (Neuronal protein 4.1) (4.1N)	Epb41l1 Epb4.1l1	879	19	26.1757	0.0224823	26.2035	0.024299	1.01946	0.0172581	>0.05
Q9WTV5	PSMD9_RAT	26S proteasome non-ATPase regulatory subunit 9 (26S proteasome regulatory subunit p27) (Transactivating protein Bridge-1)	Psmd9	222	2	21.1362	0.0831849	21.075	0.0635435	0.95848	0.0429179	>0.05
Q9WU82	CTNB1_RAT	Catenin beta-1 (Beta-catenin)	Ctnnb1 Catnb	781	14	26.1903	0.0455836	26.1476	0.0314806	0.970853	0.0214572	>0.05
Q9WUC4	ATOX1_RAT	Copper transport protein ATOX1 (ATX1 homolog protein Rah1) (Metal transport protein ATX1)	Atox1 Rah1	68	2	21.6269	0.036866	21.6426	0.0377947	1.01091	0.025993	>0.05
Q9WUS0	KAD4_RAT	Adenylate kinase 4, mitochondrial (AK 4) (EC 2.7.4.10) (EC 2.7.4.6) (Adenylate kinase 3-like) (Adenylate kinase isoenzyme 4) (GTP:AMP phosphotransferase AK4)	Ak4 Ak3l1	223	2	20.0923	0.0391326	20.039	0.0594057	0.963757	0.0400656	>0.05
Q9WUW2	Q9WUW2_RAT	Vesicle associated membrane protein 2B	Vamp2 vamp2	135	4	27.8237	0.0881681	27.9637	0.0843753	1.10192	0.0691706	>0.05
Q9WV63	KIF2A_RAT	Kinesin-like protein KIF2A (Kinesin-2)	Kif2a Kif2	705	3	20.8012	0.0660765	20.8449	0.0481854	1.03075	0.0333282	>0.05
Q9WV97	TIM9_RAT	Mitochondrial import inner membrane translocase subunit Tim9	Timm9 Tim9 Tim9a Timm9a	89	3	24.6833	0.0463626	24.6675	0.0687437	0.989115	0.0486286	>0.05
Q9WVB1	RAB6A_RAT	Ras-related protein Rab-6A (Rab-6)	Rab6a Rab6	208	4	22.6867	0.0381245	22.7296	0.0382845	1.03022	0.0271751	>0.05
Q9WVE9	ITSN1_RAT	Intersectin-1 (EH domain and SH3 domain regulator of endocytosis 1)	Itsn1 Ehsh1 Itsn	1217	4	21.7192	0.0620021	21.7437	0.0753452	1.01713	0.0522929	>0.05
Q9Z0G8	WIPF3_RAT	WAS/WASL-interacting protein family member 3 (Corticosteroids and regional expression protein 16)	Wipf3 Cr16	485	3	22.0651	0.0547525	22.0651	0.056616	0.999963	0.0389329	>0.05
Q9Z0J8	NEGR1_RAT	Neuronal growth regulator 1 (Kindred of IgLON) (Kilon)	Negr1	348	4	25.0632	0.0549058	25.1099	0.0615194	1.03289	0.0449459	>0.05
Q9Z0U4	GABR1_RAT	Gamma-aminobutyric acid type B receptor subunit 1 (GABA-B receptor 1) (GABA-B-R1) (GABA-BR1) (GABABR1) (Gb1)	Gabbr1	991	3	21.1125	0.1847	21.3395	0.137961	1.1704	0.111015	>0.05
Q9Z0U8	Q9Z0U8_RAT	Nucleic acid binding factor pRM10	Hnrnpab Hnrpab pRM10	298	3	23.6274	0.01499	23.6412	0.0267178	1.00962	0.0182233	>0.05
Q9Z0V6	PRDX3_RAT	Thioredoxin-dependent peroxide reductase, mitochondrial (EC 1.11.1.15) (PRx III) (Peroxiredoxin-3) (PRX-3)	Prdx3	257	4	25.7463	0.0249957	25.7456	0.0191614	0.999545	0.0131923	>0.05
Q9Z1B2	GSTM5_RAT	Glutathione S-transferase Mu 5 (EC 2.5.1.18) (GST class-mu 5)	Gstm5	225	6	22.2271	0.0722468	22.316	0.0362212	1.06353	0.0267473	>0.05
Q9Z1E1	FLOT1_RAT	Flotillin-1 (Reggie-2) (REG-2)	Flot1 Reg2	428	3	21.979	0.0391428	22.0141	0.0303746	1.0246	0.0216262	>0.05
Q9Z1J8	S14L3_RAT	SEC14-like protein 3 (45 kDa secretory protein) (rsec45)	Sec14l3	400	2	20.4242	0.0761732	20.4283	0.0813813	1.00288	0.057055	>0.05
Q9Z1N4	BPNT1_RAT	3'(2'),5'-bisphosphate nucleotidase 1 (EC 3.1.3.7) (Bisphosphate 3'-nucleotidase 1) (PAP-inositol 1,4-phosphatase) (PIP) (scHAL2 analogous 3)	Bpnt1 Sal3	308	8	23.3836	0.0276633	23.4116	0.0554967	1.01959	0.0402965	>0.05
Q9Z1T4	CNKR2_RAT	Connector enhancer of kinase suppressor of ras 2 (Connector enhancer of KSR 2) (CNK homolog protein 2) (CNK2) (Membrane-associated guanylate kinase-interacting protein) (Maguin)	Cnksr2	1032	4	21.7471	0.0684562	21.8239	0.100244	1.05466	0.0756899	>0.05
Q9Z214	HOME1_RAT	Homer protein homolog 1 (PSD-Zip45) (VASP/Ena-related gene up-regulated during seizure and LTP 1) (Vesl-1)	Homer1 Homer Vesl	366	12	24.7424	0.0437497	24.7769	0.030688	1.02418	0.0218936	>0.05
Q9Z269	VAPB_RAT	Vesicle-associated membrane protein-associated protein B (VAMP-B) (VAMP-associated protein B) (VAP-B)	Vapb	243	4	24.3789	0.0321251	24.3923	0.0426796	1.00931	0.0291472	>0.05
Q9Z270	VAPA_RAT	Vesicle-associated membrane protein-associated protein A (VAMP-A) (VAMP-associated protein A) (VAP-A) (33 kDa VAMP-associated protein) (VAP-33)	Vapa Vap33	249	7	25.342	0.0246047	25.3218	0.0264929	0.986121	0.0186133	>0.05
Q9Z272	GIT1_RAT	ARF GTPase-activating protein GIT1 (ARF GAP GIT1) (Cool-associated and tyrosine-phosphorylated protein 1) (CAT-1) (CAT1) (G protein-coupled receptor kinase-interactor 1) (GRK-interacting protein 1)	Git1	770	8	22.6823	0.0806219	22.7768	0.0652178	1.06767	0.0498954	>0.05
Q9Z2L0	VDAC1_RAT	Voltage-dependent anion-selective channel protein 1 (VDAC-1) (rVDAC1) (Outer mitochondrial membrane protein porin 1)	Vdac1	283	16	29.7721	0.0175403	29.7757	0.0282644	1.00251	0.0192142	>0.05
Q9Z2L9	NDRG4_RAT	Protein NDRG4 (Brain development-related molecule 1)	Ndrg4 Bdm1 Ndr4	352	3	22.598	0.0331025	22.6537	0.0405147	1.03932	0.0303293	>0.05
Q9Z2Q1	SC31A_RAT	Protein transport protein Sec31A (SEC31-like protein 1) (SEC31-related protein A) (Vesicle-associated protein 1)	Sec31a Sec31l1 Vap1	1249	3	19.7992	0.102123	19.8486	0.0563946	1.03489	0.0409259	>0.05
Q9Z327	SYNPO_RAT	Synaptopodin	Synpo	931	14	26.3335	0.0236935	26.3114	0.0270459	0.984823	0.0185048	>0.05
R9PXR7	R9PXR7_RAT	Prostaglandin E synthase 3 (Fragment)	Ptges3	159	2	24.0369	0.0326977	23.9959	0.0270412	0.971962	0.0182455	>0.05
U6A022	U6A022_RAT	ArfGAP with GTPase domain, ankyrin repeat and PH domain 3	AGAP3	808	2	19.2344	0.0717305	19.0992	0.075476	0.910534	0.0441036	>0.05
Z4YNG7	Z4YNG7_RAT	Oxidation resistance protein 1 (Fragment)	Oxr1	821	13	25.2347	0.0274193	25.2505	0.0262051	1.01102	0.0187295	>0.05
Z4YNP1	Z4YNP1_RAT	CUGBP Elav-like family member 2	Celf2	505	4	22.3169	0.0627901	22.3611	0.0367835	1.0311	0.0260499	>0.05

## Sheet: Supplementary Table S-2b
Supplementarty Table S-2b. Quantitative results in the experimental null (EN) samples using spectral counting method.
Protein AC	Entry Name	Protein Name	Gene Name	Length	EN group 1 SpC	SEM	EN group 2 SpC	SEM	Ratio	SEM	p-value
A0A096MJ42	A0A096MJ42_RAT	Disks large homolog 3	Dlg3	817	1.94319	0.275206	0.9226	0.184425	0.474785	0.0949084	<0.05
A0A096MJE6	A0A096MJE6_RAT	Tenascin R, isoform CRA_b (Tenascin-R)	Tnr rCG_46283	1358	23.7811	0.681781	21.8975	0.748938	0.920794	0.031493	>0.05
A0A096MJM1	A0A096MJM1_RAT	Protein Rhog	Rhog	185	5.17305	0.340963	4.38498	0.411024	0.847659	0.0794548	>0.05
A0A096MJN4	A0A096MJN4_RAT	Protein Sept4	42251	459	5.54867	0.595845	4.70756	0.634921	0.848412	0.114428	>0.05
A0A096MJW8	A0A096MJW8_RAT	Protein Plch1	Plch1	1648	0.19393	0.19393	0	0	0	0	>0.05
A0A097PE04	A0A097PE04_RAT	Cytochrome c oxidase subunit II	COX2	227	15.4287	0.790857	13.7057	0.894207	0.888325	0.0579574	>0.05
A0A0A0MXV4	A0A0A0MXV4_RAT	Protein Ace3	Ace3	1269	0.098787	0.098787	0.51425	0.277366	5.20564	2.80772	>0.05
A0A0A0MY13	A0A0A0MY13_RAT	Probable G-protein-coupled receptor 158	Gpr158	1206	5.28404	0.302792	4.49752	0.263326	0.851152	0.0498343	>0.05
A0A0A0MY20	A0A0A0MY20_RAT	Uncharacterized protein (Fragment)	0	302	0.196005	0.13067	0.50796	0.225476	2.59157	1.15036	>0.05
A0JPJ7	OLA1_RAT	Obg-like ATPase 1	Ola1	396	5.48048	0.335978	4.59457	0.428978	0.838352	0.0782738	>0.05
A1A5L2	A1A5L2_RAT	Pgm1 protein (Fragment)	Pgm1	583	7.74759	0.695792	7.57844	0.483977	0.978167	0.0624681	>0.05
A1L108	ARP5L_RAT	Actin-related protein 2/3 complex subunit 5-like protein (Arp2/3 complex 16 kDa subunit 2) (ARC16-2)	Arpc5l	153	2.54227	0.259028	3.58541	0.234244	1.41032	0.0921396	<0.05
A1L1J8	A1L1J8_RAT	Protein Rab5b (RAB5B, member RAS oncogene family) (RAB5B, member RAS oncogene family (Predicted), isoform CRA_c)	Rab5b Rab5b_predicted rCG_42413	215	2.05863	0.231775	2.15734	0.288608	1.04795	0.140194	>0.05
A1L1L9	A1L1L9_RAT	RGD1563224 protein	Tmem65 RGD1563224	261	0.488012	0.217619	0.714106	0.155888	1.4633	0.319434	>0.05
A1L1M0	A1L1M0_RAT	Protein kinase, cAMP-dependent, catalytic, alpha (cAMP-dependent protein kinase catalytic subunit alpha)	Prkaca rCG_51506	351	8.32993	0.661441	9.10055	0.50947	1.09251	0.0611614	>0.05
A2VCW8	A2VCW8_RAT	Septin 7	42254	437	23.8454	0.93273	22.8026	0.736105	0.956268	0.0308699	>0.05
A3FM27	A3FM27_RAT	Chloride intracellular channel protein	Clic4	253	0.398346	0.162648	1.22361	0.24872	3.07173	0.624381	<0.05
A7VJC2	ROA2_RAT	Heterogeneous nuclear ribonucleoproteins A2/B1 (hnRNP A2/B1)	Hnrnpa2b1 Hnrnp Hnrpa2b1	353	14.2838	0.367595	14.3209	0.62942	1.0026	0.0440653	>0.05
B0BMW0	B0BMW0_RAT	RAB14, member RAS oncogene family (Ras-related protein Rab-14)	Rab14 rCG_45389	215	15.6575	0.498787	16.4585	0.493165	1.05116	0.031497	>0.05
B0BMX3	B0BMX3_RAT	Protein S100a16 (S100 calcium binding protein A16 (Predicted), isoform CRA_a) (S100a16 protein)	S100a16 S100a16_predicted rCG_62722	123	0.978535	0.00729035	1.0246	0.154273	1.04707	0.157657	>0.05
B0BMY7	B0BMY7_RAT	Protein Twf2 (Protein tyrosine kinase 9-like (A6-related protein) (Predicted), isoform CRA_b) (Ptk9l protein)	Twf2 LOC684352 Ptk9l Ptk9l_predicted rCG_25118	349	1.37243	0.162733	1.03229	0.268115	0.752164	0.195358	>0.05
B0BN52	B0BN52_RAT	Mitochondrial carrier homolog 2 (C. elegans) (Mitochondrial carrier homolog 2 (C. elegans) (Predicted), isoform CRA_a) (Protein Mtch2)	Mtch2 Mtch2_predicted rCG_26739	303	7.81302	0.319857	6.9568	0.295936	0.890411	0.0378772	>0.05
B0BN56	RT31_RAT	28S ribosomal protein S31, mitochondrial (MRP-S31) (S31mt)	Mrps31	387	0.10009	0.10009	0.51106	0.226934	5.106	2.2673	>0.05
B0BN63	B0BN63_RAT	LOC681996 protein (Protein Ahsa1) (RCG20659, isoform CRA_b)	Ahsa1 LOC681996 rCG_20659	338	3.71188	0.375433	3.3748	0.339282	0.909189	0.0914043	>0.05
B0BN65	B0BN65_RAT	Family with sequence similarity 49, member A (Protein Fam49a) (Putative uncharacterized protein RGD1305961_predicted)	Fam49a RGD1305961_predicted rCG_62196	323	3.51441	0.286347	3.37896	0.34789	0.961459	0.0989897	>0.05
B0BN81	B0BN81_RAT	40S ribosomal protein S5 (Ribosomal protein S5, isoform CRA_b) (Rps5 protein)	Rps5 rCG_27438	204	2.14533	0.274151	1.94523	0.186127	0.906728	0.086759	>0.05
B0BN85	SUGT1_RAT	Suppressor of G2 allele of SKP1 homolog	Sugt1	336	1.07532	0.174845	0.51342	0.171161	0.477459	0.159173	<0.05
B0BN93	PSD13_RAT	26S proteasome non-ATPase regulatory subunit 13 (26S proteasome regulatory subunit RPN9) (26S proteasome regulatory subunit S11) (26S proteasome regulatory subunit p40.5)	Psmd13	376	0.486705	0.21913	0.20393	0.135971	0.419001	0.27937	>0.05
B0BNB2	B0BNB2_RAT	Density-regulated protein	Denr LOC687565 rCG_21490	194	1.17727	0.135195	0.918656	0.102161	0.780328	0.086778	>0.05
B0BND0	ENPP6_RAT	Ectonucleotide pyrophosphatase/phosphodiesterase family member 6 (E-NPP 6) (NPP-6) (EC 3.1.4.-) (EC 3.1.4.38) (Choline-specific glycerophosphodiester phosphodiesterase) (Glycerophosphocholine cholinephosphodiesterase) (GPC-Cpde)	Enpp6	440	1.65951	0.288487	1.43101	0.226363	0.862311	0.136404	>0.05
B0BNE5	ESTD_RAT	S-formylglutathione hydrolase (FGH) (EC 3.1.2.12) (Esterase D)	Esd	282	3.12253	0.343678	2.55254	0.345411	0.817459	0.110619	>0.05
B0BNE6	B0BNE6_RAT	NADH dehydrogenase (Ubiquinone) Fe-S protein 8 (Predicted), isoform CRA_a (Ndufs8 protein) (Protein Ndufs8)	Ndufs8 Ndufs8_predicted rCG_47133	212	3.91572	0.258539	4.9075	0.194454	1.25328	0.0496597	<0.05
B0BNE7	B0BNE7_RAT	Tetraspanin	Tspan7 Tm4sf2_mapped rCG_42841	249	0.978535	0.00729035	1.01917	0.1499	1.04152	0.153188	>0.05
B0BNK1	B0BNK1_RAT	Protein Rab5c (RCG32615, isoform CRA_a) (Rab5c protein)	Rab5c rCG_32615	216	3.53334	0.274919	2.96579	0.284953	0.839373	0.0806468	>0.05
B0BNL2	B0BNL2_RAT	PDZ domain-containing protein 2 (Peptidylprolyl cis/trans isomerase, NIMA-interacting 1) (Protein (Peptidyl-prolyl cis/trans isomerase) NIMA-interacting 1 (Predicted), isoform CRA_a)	LOC364561 Pin1 Pin1_predicted rCG_31594	165	3.32566	0.458866	4.70148	0.304669	1.4137	0.0916116	<0.05
B0BNM1	NNRE_RAT	NAD(P)H-hydrate epimerase (EC 5.1.99.6) (Apolipoprotein A-I-binding protein) (AI-BP) (NAD(P)HX epimerase)	Apoa1bp Aibp	282	3.6332	0.269712	2.96805	0.32475	0.816924	0.089384	>0.05
B0BNM9	GLTP_RAT	Glycolipid transfer protein (GLTP)	GLTP	209	1.76646	0.136017	1.84089	0.135942	1.04213	0.076957	>0.05
B0BNN3	CAH1_RAT	Carbonic anhydrase 1 (EC 4.2.1.1) (Carbonate dehydratase I) (Carbonic anhydrase I) (CA-I)	Ca1 Car1	261	1.16761	0.241827	1.12994	0.242196	0.967734	0.207429	>0.05
B0K008	B0K008_RAT	Eukaryotic translation initiation factor 1 (Protein Eif1) (RCG33041, isoform CRA_b)	Eif1 Eif1l1 Gm5471 rCG_33041	113	1.36898	0.159143	0.818926	0.20496	0.598201	0.149717	<0.05
B0K014	B0K014_RAT	D-tyrosyl-tRNA(Tyr) deacylase (EC 3.1.-.-)	Dtd1	209	3.23324	0.217859	2.04748	0.156962	0.63326	0.0485465	<0.05
B0K020	CISD1_RAT	CDGSH iron-sulfur domain-containing protein 1 (MitoNEET)	Cisd1	108	7.92701	0.34848	6.34801	0.436098	0.800808	0.0550141	<0.05
B0K031	B0K031_RAT	60S ribosomal protein L7 (RCG30479, isoform CRA_b) (Rpl7 protein)	Rpl7 rCG_30479	260	1.1825	0.199413	1.12303	0.0972039	0.949707	0.082202	>0.05
B1H239	B1H239_RAT	Leucine rich repeat containing 49 (Predicted) (Lrrc49 protein) (Protein Lrrc49)	Lrrc49 Lrrc49_predicted rCG_58039	686	1.27449	0.152627	0.714676	0.155998	0.560754	0.1224	<0.05
B1WBS4	B1WBS4_RAT	Protein Vps26b (Similar to Vacuolar protein sorting 26 homolog (VPS26 protein homolog), isoform CRA_a) (Vps26b protein)	Vps26b LOC300472 rCG_22813	336	1.75488	0.188454	1.12299	0.178603	0.639923	0.101775	<0.05
B1WBV6	B1WBV6_RAT	Aplp1 protein	Aplp1	644	0.883036	0.17534	0.919666	0.185038	1.04148	0.209548	>0.05
B1WBW4	ARM10_RAT	Armadillo repeat-containing protein 10	Armc10	306	1.16701	0.239917	1.42752	0.161841	1.22323	0.13868	>0.05
B1WC26	B1WC26_RAT	N-acetylneuraminic acid synthase (N-acetylneuraminic acid synthase (Sialic acid synthase) (Predicted), isoform CRA_a) (Protein Nans)	Nans Nans_predicted rCG_55111	359	2.84783	0.403584	3.17912	0.330569	1.11633	0.116078	>0.05
B1WC34	B1WC34_RAT	Protein Prkcsh (Protein kinase C substrate 80K-H) (Protein kinase C substrate 80K-H (Predicted), isoform CRA_b)	Prkcsh Prkcsh_predicted rCG_31596	525	3.52911	0.2732	2.75834	0.262829	0.781596	0.0744745	>0.05
B1WC50	B1WC50_RAT	Ewsr1 protein (Protein Ewsr1) (RCG36110, isoform CRA_a)	Ewsr1 rCG_36110	655	0.781482	0.130425	0.30452	0.215669	0.38967	0.275974	>0.05
B1WC61	B1WC61_RAT	Acad9 protein (Protein Acad9)	Acad9	625	3.32546	0.158141	2.85643	0.243336	0.858958	0.0731736	>0.05
B1WC64	B1WC64_RAT	Cyp46a1 protein	Cyp46a1	500	1.4598	0.256758	1.12432	0.279946	0.770188	0.191771	>0.05
B2DD29	BRSK1_RAT	Serine/threonine-protein kinase BRSK1 (EC 2.7.11.1) (EC 2.7.11.26) (Brain-specific serine/threonine-protein kinase 1) (BR serine/threonine-protein kinase 1) (Serine/threonine-protein kinase SAD-B)	Brsk1 Sadb	778	0.19393	0.19393	0	0	0	0	>0.05
B2GUV5	B2GUV5_RAT	ATPase, H transporting, lysosomal V1 subunit G1 (Protein Atp6v1g1) (RCG55259, isoform CRA_c)	Atp6v1g1 rCG_55259	118	2.73608	0.191553	3.26766	0.363652	1.19429	0.13291	>0.05
B2GUY4	B2GUY4_RAT	Epb4.9 protein (Protein Dmtn)	Dmtn Epb4.9 Epb49	354	3.71627	0.127602	3.06678	0.40015	0.825231	0.107675	>0.05
B2GUZ3	B2GUZ3_RAT	Mthfd1l protein (Protein Mthfd1l)	Mthfd1l	977	0.784062	0.195977	0.404366	0.222992	0.515732	0.284406	>0.05
B2GUZ5	CAZA1_RAT	F-actin-capping protein subunit alpha-1 (CapZ alpha-1)	Capza1	286	3.40877	0.445595	3.57418	0.340487	1.04852	0.0998855	>0.05
B2GUZ9	B2GUZ9_RAT	Fam49b protein (Protein Fam49b) (Similar to 0910001A06Rik protein (Predicted), isoform CRA_a)	Fam49b RGD1307697_predicted rCG_59591	324	8.01502	0.218895	7.15826	0.296672	0.893106	0.0370145	<0.05
B2GV06	SCOT1_RAT	Succinyl-CoA:3-ketoacid coenzyme A transferase 1, mitochondrial (EC 2.8.3.5) (3-oxoacid CoA-transferase 1) (Somatic-type succinyl-CoA:3-oxoacid CoA-transferase) (SCOT-s)	Oxct1 Oxct Scot	520	4.30392	0.158029	4.09587	0.407326	0.95166	0.0946407	>0.05
B2GV54	NCEH1_RAT	Neutral cholesterol ester hydrolase 1 (NCEH) (EC 3.1.1.-) (Arylacetamide deacetylase-like 1)	Nceh1 Aadacl1	408	0.981389	0.291446	1.0151	0.260306	1.03435	0.265242	>0.05
B2GV72	B2GV72_RAT	Carbonyl reductase 3 (Carbonyl reductase 3 (Predicted)) (Protein Cbr3)	Cbr3 Cbr3_predicted rCG_53069	277	1.57248	0.166497	1.43309	0.22796	0.911355	0.144969	>0.05
B2GV73	B2GV73_RAT	Actin-related protein 2/3 complex subunit 3 (Arp2/3 complex 21 kDa subunit)	Arpc3 Arpc3_predicted rCG_21863	178	0.594894	0.265603	0.20398	0.136004	0.342885	0.228618	>0.05
B2GV74	B2GV74_RAT	Kinesin light chain 2 (Predicted), isoform CRA_b (Klc2 protein) (Protein Klc2)	Klc2 Klc2_predicted rCG_48462	622	1.36908	0.218028	1.53821	0.233659	1.12353	0.170669	>0.05
B2GVB4	B2GVB4_RAT	Sept9 protein (Fragment)	42256	550	0.684228	0.209066	1.1247	0.238049	1.64375	0.347909	>0.05
B2RYG6	OTUB1_RAT	Ubiquitin thioesterase OTUB1 (EC 3.4.19.12) (Deubiquitinating enzyme OTUB1) (OTU domain-containing ubiquitin aldehyde-binding protein 1) (Otubain-1) (Ubiquitin-specific-processing protease OTUB1)	Otub1	271	8.19733	0.519996	8.79932	0.353216	1.07344	0.0430892	>0.05
B2RYJ7	B2RYJ7_RAT	ARP1 actin-related protein 1 homolog B (Yeast) (Protein Actr1b) (RCG22324, isoform CRA_a)	Actr1b rCG_22324	376	9.08113	0.414193	6.95231	0.514485	0.765578	0.0566543	<0.05
B2RYQ2	B2RYQ2_RAT	Serine/threonine-protein phosphatase 2A activator (EC 5.2.1.8) (Phosphotyrosyl phosphatase activator)	Ppp2r4 Ppp2r4_predicted rCG_45567	323	3.3272	0.162387	3.17323	0.284982	0.953724	0.0856523	>0.05
B2RYS2	B2RYS2_RAT	Cytochrome b-c1 complex subunit 7	LOC685596 Uqcrb rCG_60159	111	8.32205	0.377501	7.06796	0.430715	0.849305	0.0517558	<0.05
B2RYS8	B2RYS8_RAT	NADH dehydrogenase (Ubiquinone) 1 beta subcomplex 8 (NADH dehydrogenase (Ubiquinone) 1 beta subcomplex 8 (Predicted), isoform CRA_a) (Protein Ndufb8)	Ndufb8 Ndufb8_predicted rCG_57427	186	2.94381	0.495574	3.68656	0.438004	1.25231	0.148788	>0.05
B2RYT5	B2RYT5_RAT	Cox7a2l protein (Cytochrome c oxidase subunit VIIa polypeptide 2 like (Predicted), isoform CRA_d)	Cox7a2l Cox7a2l_predicted rCG_61728	113	2.73521	0.236302	3.47829	0.227038	1.27167	0.0830056	<0.05
B2RYW3	B2RYW3_RAT	NADH dehydrogenase (Ubiquinone) 1 beta subcomplex, 9 (NADH dehydrogenase (Ubiquinone) 1 beta subcomplex, 9 (Predicted)) (Ndufb9 protein) (Protein Ndufb9)	Ndufb9 Ndufb9_predicted rCG_60288	179	4.20575	0.328361	3.16949	0.276424	0.753609	0.0657252	<0.05
B2RYW9	FAHD2_RAT	Fumarylacetoacetate hydrolase domain-containing protein 2 (EC 3.-.-.-)	Fahd2 Fahd2a	313	7.63171	0.325476	6.33533	0.437552	0.830132	0.0573334	<0.05
B2RYX1	B2RYX1_RAT	LOC685322 protein (RCG36127, isoform CRA_c)	Uqcr10 LOC685322 rCG_36127	64	2.63786	0.25332	2.55831	0.22786	0.969843	0.0863806	>0.05
B2RZ27	B2RZ27_RAT	Protein Sh3bgrl3 (SH3 domain binding glutamic acid-rich protein-like 3) (SH3 domain binding glutamic acid-rich protein-like 3 (Predicted), isoform CRA_b)	Sh3bgrl3 Sh3bgrl3_predicted rCG_30780	93	1.85901	0.176397	1.73977	0.265597	0.935854	0.14287	>0.05
B2RZ33	B2RZ33_RAT	Nck1 protein (Non-catalytic region of tyrosine kinase adaptor protein 1 (Predicted), isoform CRA_a)	Nck1 Nck1_predicted rCG_25905	377	0.1873	0.1873	0	0	0	0	>0.05
B2RZ37	REEP5_RAT	Receptor expression-enhancing protein 5 (Polyposis locus protein 1 homolog)	Reep5 Dp1	189	1.86044	0.272504	2.14381	0.318202	1.15232	0.171036	>0.05
B2RZ72	B2RZ72_RAT	Actin related protein 2/3 complex, subunit 4 (Predicted), isoform CRA_a (Arpc4 protein) (Protein Arpc4)	Arpc4 Arpc4_predicted rCG_56555	168	3.62765	0.421108	2.97448	0.476656	0.819947	0.131395	>0.05
B2RZ78	VPS29_RAT	Vacuolar protein sorting-associated protein 29 (Vesicle protein sorting 29)	Vps29	182	0.097387	0.097387	1.02874	0.217135	10.5634	2.22961	<0.05
B2RZA9	B2RZA9_RAT	Protein Ube2l3 (Ube2l3 protein)	Ube2l3	154	5.5859	0.345988	4.60651	0.278067	0.824667	0.0497802	<0.05
B2RZC6	B2RZC6_RAT	Ilf2 protein (RCG62739, isoform CRA_a)	Ilf2 rCG_62739	390	0.681865	0.148927	1.22577	0.203899	1.79767	0.299031	<0.05
B2RZD6	B2RZD6_RAT	Ndufa4 protein (Protein Ndufa4) (RCG28086, isoform CRA_a)	Ndufa4 rCG_28086	82	7.53427	0.211536	6.34671	0.306254	0.842379	0.0406482	<0.05
B3GNI6	SEP11_RAT	Septin-11	42258	431	18.98	0.614405	16.6815	0.87602	0.878899	0.0461549	<0.05
B4F772	B4F772_RAT	Heat shock 70 kDa protein 4L (Heat shock 70kDa protein 4-like (Predicted), isoform CRA_b) (Hspa4l protein)	Hspa4l Hspa4l_predicted rCG_41537	838	8.98353	0.50349	6.86034	0.467175	0.763657	0.0520035	<0.05
B4F774	B4F774_RAT	Ganglioside-induced differentiation-associated protein 1-like 1 (Predicted) (Gdap1l1 protein) (Protein Gdap1l1)	Gdap1l1 Gdap1l1_predicted rCG_32097	366	2.44197	0.156628	1.02533	0.218226	0.419877	0.0893646	<0.05
B4F7A3	B4F7A3_RAT	Galectin	Lgalsl Hspc159 rCG_23337	172	0.484008	0.161428	1.23198	0.302385	2.54536	0.624752	<0.05
B4F7C2	B4F7C2_RAT	Protein Tubb4a (RCG45085) (Tubulin, beta 4)	Tubb4a Tubb4 rCG_45085	444	468.245	4.73327	442.576	4.29453	0.94518	0.00917154	<0.05
B4F7C7	B4F7C7_RAT	Hebp1 protein (Heme binding protein 1 (Predicted), isoform CRA_a)	Hebp1 Hebp1_predicted rCG_29707	190	2.0599	0.232908	3.18005	0.363579	1.54379	0.176503	<0.05
B5DEL2	B5DEL2_RAT	Cpsf1 protein	Cpsf1	1439	0.199707	0.133147	0.20687	0.20687	1.03587	1.03587	>0.05
B5DEL8	B5DEL8_RAT	NADH dehydrogenase (Ubiquinone) Fe-S protein 5 (Protein LOC100361505) (RCG31129, isoform CRA_b)	LOC100361505 LOC100363268 Ndufs5 rCG_31129	106	3.12532	0.185429	1.73796	0.305684	0.55609	0.0978088	<0.05
B5DEN5	B5DEN5_RAT	Eukaryotic translation elongation factor 1 beta 2 (Protein Eef1b2) (RCG22471, isoform CRA_b)	Eef1b2 rCG_22471	225	2.93195	0.250094	2.45361	0.222046	0.836853	0.0757331	>0.05
B5DF41	SNPH_RAT	Syntaphilin	Snph	504	1.66415	0.209079	0.92054	0.317475	0.55316	0.190773	>0.05
B5DF55	B5DF55_RAT	Protein Stam (RCG55706) (Signal transducing adaptor molecule (SH3 domain and ITAM motif) 1)	Stam rCG_55706	547	0.977566	0.149156	0.817116	0.136267	0.835868	0.139394	>0.05
B5DF65	B5DF65_RAT	Biliverdin reductase B (Flavin reductase (NADPH)) (Biliverdin reductase B (Flavin reductase (NADPH)) (Predicted), isoform CRA_b) (Protein Blvrb)	Blvrb Blvrb_predicted LOC681468 rCG_53861	206	2.05363	0.226865	3.17222	0.287483	1.54469	0.139987	<0.05
B5DF89	CUL3_RAT	Cullin-3	Cul3	768	0.870693	0.267829	0.41103	0.16783	0.472072	0.192755	>0.05
B5DF91	B5DF91_RAT	ELAV-like protein	Elavl1 Elavl1_predicted hur rCG_58936	326	0.980942	0.206675	1.43145	0.310988	1.45926	0.31703	>0.05
B5DFC3	B5DFC3_RAT	Protein Sec23a (SEC23A (S. cerevisiae) (Predicted)) (Sec23 homolog A (S. cerevisiae))	Sec23a Sec23a_predicted rCG_62116	765	0.783501	0.243396	0.818216	0.205993	1.04431	0.262913	>0.05
B5DFD8	B5DFD8_RAT	SH3 domain-binding glutamic acid-rich-like protein	Sh3bgrl Sh3bgrl_predicted rCG_38007	114	0.678712	0.204738	0.51281	0.170956	0.755563	0.251883	>0.05
B5DFE0	B5DFE0_RAT	Mpp6 protein (Protein Mpp6) (RCG52465, isoform CRA_b)	Mpp6 rCG_52465	540	0.784143	0.198447	1.33294	0.159829	1.69986	0.203827	<0.05
B5DFF7	B5DFF7_RAT	Dusp3 protein	Dusp3	185	3.52133	0.334673	3.68007	0.267364	1.04508	0.075927	>0.05
B5DFG5	B5DFG5_RAT	Protein Sept6 (RCG53214, isoform CRA_d) (Sept6 protein)	Sept6 Nkrf rCG_53214	427	17.1229	0.691036	15.1365	0.835449	0.883992	0.0487913	>0.05
B5DFI9	B5DFI9_RAT	Pdk3 protein (Protein Pdk3) (Pyruvate dehydrogenase kinase, isoenzyme 3 (Mapped), isoform CRA_a)	Pdk3 Pdk3_mapped rCG_36457	415	2.341	0.203907	0.716366	0.218954	0.306009	0.0935303	<0.05
B5DFK1	B5DFK1_RAT	Coatomer subunit alpha	Copa	1224	0.39192	0.21746	0.82277	0.13717	2.09933	0.349994	>0.05
B5DFK6	B5DFK6_RAT	AP-3 complex subunit delta	Ap3d1 rCG_29405	1204	5.68369	0.443965	6.85905	0.436168	1.2068	0.0767402	>0.05
B5DFM3	B5DFM3_RAT	Ly6h protein (Fragment)	Ly6h	181	2.93378	0.143449	2.55342	0.268314	0.870352	0.0914566	>0.05
B5DFN2	B5DFN2_RAT	Adenosylhomocysteinase (EC 3.3.1.1) (Fragment)	Ahcyl1	482	2.82702	0.391927	1.94093	0.179554	0.686565	0.0635136	>0.05
B6DTP5	B6DTP5_RAT	DEAD (Asp-Glu-Ala-Asp) box polypeptide 5 (Fragment)	Ddx5	614	2.93477	0.289747	2.24549	0.293967	0.765133	0.100167	>0.05
B6RK61	B6RK61_RAT	Myosin heavy chain 7B (Protein Myh7b)	Myh7b	1941	0.775184	0.190355	0.10051	0.10051	0.12966	0.12966	<0.05
C7E1V2	C7E1V2_RAT	Inositol 1,4,5-trisphosphate receptor type 1	Itpr1	2748	4.41378	0.521374	5.31663	0.420714	1.20455	0.0953184	>0.05
D0UFD0	D0UFD0_RAT	Prostate leucine zipper variant 2	PrLZ	224	0.591492	0.161102	0.409006	0.226668	0.691482	0.383215	>0.05
D3Z8I7	D3Z8I7_RAT	Protein Gstt3 (Similar to Glutathione S-transferase, theta 3 (Predicted))	Gstt3 RGD1562732_predicted rCG_60614	210	2.06572	0.312781	3.0719	0.220412	1.48709	0.1067	<0.05
D3Z8P5	D3Z8P5_RAT	Uncharacterized protein (Fragment)	RGD1566085	319	0.68755	0.257716	0.303216	0.154407	0.441009	0.224576	>0.05
D3Z8U8	D3Z8U8_RAT	Uncharacterized protein	0	315	24.1504	0.620165	23.7314	0.399855	0.98265	0.0165569	>0.05
D3Z955	D3Z955_RAT	Protein Pgm2l1 (RCG40012, isoform CRA_a)	Pgm2l1 rCG_40012	621	1.55203	0.318099	1.02256	0.153335	0.658849	0.0987959	>0.05
D3Z9L0	D3Z9L0_RAT	Protein Agk (Similar to putative lipid kinase (Predicted), isoform CRA_c)	Agk RGD1562046_predicted rCG_27864	421	0.682187	0.208734	0.510066	0.170059	0.747692	0.249285	>0.05
D3Z9W4	D3Z9W4_RAT	Protein LOC100909620 (Fragment)	RGD1564380 LOC100909620	229	0	0	0.20109	0.20109	N/A	N/A	>0.05
D3ZA19	D3ZA19_RAT	Protein Satl1	Satl1	758	0.1873	0.1873	0	0	0	0	>0.05
D3ZA85	D3ZA85_RAT	Histone cell cycle regulation defective interacting protein 5 (Predicted), isoform CRA_a (Protein Nfu1)	Nfu1 Hirip5_predicted rCG_56512	253	0.975828	0.145335	0.61499	0.272902	0.630224	0.279663	>0.05
D3ZAA0	D3ZAA0_RAT	PRA1 domain family 2 (Predicted) (Protein Praf2)	Praf2 Praf2_predicted rCG_22882	178	0.193598	0.129151	0.712376	0.21594	3.67967	1.1154	>0.05
D3ZAA9	D3ZAA9_RAT	Membrane protein, palmitoylated 2 (MAGUK p55 subfamily member 2), isoform CRA_a (Protein Mpp2)	Mpp2 rCG_34691	552	1.17661	0.198336	1.02053	0.2134	0.86735	0.181369	>0.05
D3ZAE5	D3ZAE5_RAT	Calcium-transporting ATPase (EC 3.6.3.8)	Atp2b1 rCG_48704	1220	35.4965	0.835621	36.1305	1.11366	1.01786	0.0313739	>0.05
D3ZAF6	ATPK_RAT	ATP synthase subunit f, mitochondrial	Atp5j2	88	0.494857	0.266645	1.53326	0.349316	3.09838	0.705893	<0.05
D3ZAN3	D3ZAN3_RAT	Alpha glucosidase 2 alpha neutral subunit (Predicted) (Protein Ganab)	Ganab Ganab_predicted rCG_48309	797	1.16746	0.192489	0.919166	0.181446	0.787321	0.155419	>0.05
D3ZAP9	D3ZAP9_RAT	Glycerol-3-phosphate dehydrogenase [NAD(+)] (EC 1.1.1.8)	Gpd1l	351	2.04828	0.26714	0.72016	0.220167	0.351592	0.107489	<0.05
D3ZBC8	D3ZBC8_RAT	Protein Stk31	Stk31	924	0.097908	0.097908	0.20904	0.20904	2.13507	2.13507	>0.05
D3ZBS6	D3ZBS6_RAT	Protein RGD1559864	RGD1559864	400	14.1866	0.580375	14.019	0.512241	0.988186	0.0361074	>0.05
D3ZBU7	D3ZBU7_RAT	Protein RGD1310819 (Fragment)	RGD1310819	1109	5.38831	0.406778	5.8342	0.440555	1.08275	0.0817613	>0.05
D3ZBX4	D3ZBX4_RAT	Ribosomal protein	RGD1559639	217	1.27332	0.151172	1.02318	0.00489905	0.803548	0.00384745	>0.05
D3ZC07	D3ZC07_RAT	Protein Pkn3	Pkn3	958	1.0735	0.173753	0.7142	0.216268	0.665301	0.201461	>0.05
D3ZC15	D3ZC15_RAT	Protein Rltpr	Rltpr RGD1562390	1297	1.17629	0.198194	0.402936	0.164506	0.342549	0.139852	<0.05
D3ZC55	D3ZC55_RAT	Heat shock 70kDa protein 12A (Predicted), isoform CRA_a (Protein Hspa12a)	Hspa12a Hspa12a_predicted rCG_57494	675	17.6364	0.654047	16.9901	0.695217	0.963354	0.0394194	>0.05
D3ZC56	D3ZC56_RAT	Protein Dst (Fragment)	Dst	7350	0.484163	0.260345	0.30784	0.156773	0.635819	0.323802	>0.05
D3ZC63	D3ZC63_RAT	Protein Cmpk2 (Thymidylate kinase family LPS-inducible member (Predicted))	Cmpk2 Tyki_predicted rCG_62144	417	0.879657	0.307337	0.20596	0.137308	0.234137	0.156093	>0.05
D3ZC84	D3ZC84_RAT	Ubiquitin carboxyl-terminal hydrolase (EC 3.4.19.12)	Usp9x Usp9x_predicted rCG_42844	2547	1.36562	0.259968	1.53841	0.231326	1.12653	0.169393	>0.05
D3ZCA0	D3ZCA0_RAT	Proline synthetase co-transcribed (Predicted) (Protein Prosc)	Prosc Prosc_predicted rCG_43085	275	0.494076	0.220084	1.12926	0.185102	2.2856	0.374644	<0.05
D3ZCV0	D3ZCV0_RAT	Protein Actn2 (RCG30552)	Actn2 rCG_30552	894	22.6099	0.832589	23.7245	0.941935	1.0493	0.0416603	>0.05
D3ZCZ9	D3ZCZ9_RAT	Protein LOC100912599 (RCG41951, isoform CRA_a)	LOC100912599 LOC679739 rCG_41951	116	4.30204	0.210929	5.3143	0.389371	1.2353	0.0905085	<0.05
D3ZD04	D3ZD04_RAT	Dystrobrevin	Dtna	687	0.487843	0.162665	0.91997	0.238129	1.88579	0.488126	>0.05
D3ZD09	D3ZD09_RAT	Cytochrome c oxidase subunit 6B1	Cox6b1 LOC681754	86	13.2989	0.426013	13.001	0.483102	0.9776	0.0363265	>0.05
D3ZD73	D3ZD73_RAT	Protein Ddx6 (RCG58047)	Ddx6 rCG_58047	483	0.585194	0.159418	0.716916	0.266422	1.22509	0.455271	>0.05
D3ZDT1	D3ZDT1_RAT	Protein Epb41l2	Epb41l2	919	6.85984	0.502576	6.95973	0.305779	1.01456	0.0445753	>0.05
D3ZE15	D3ZE15_RAT	Protein LOC100911483 (RCG38845, isoform CRA_b)	LOC100911483 Ndufa13 rCG_38845	144	2.54918	0.168607	1.01913	0.370924	0.399787	0.145507	<0.05
D3ZE32	D3ZE32_RAT	Protein Vat1l	Vat1l LOC361414	416	3.13833	0.327412	3.99514	0.247748	1.27302	0.0789425	>0.05
D3ZEI4	D3ZEI4_RAT	Protein Hepacam	Hepacam	417	3.82181	0.457532	4.60924	0.283635	1.20604	0.0742148	>0.05
D3ZER6	D3ZER6_RAT	Protein Tnpo2 (Transportin 2 (Importin 3, karyopherin beta 2b) (Predicted))	Tnpo2 Tnpo2_predicted rCG_51621	913	0	0	0.20683	0.20683	N/A	N/A	>0.05
D3ZF07	D3ZF07_RAT	Protein RGD1562402	RGD1562402	148	0.877981	0.227511	0.921266	0.183381	1.0493	0.208867	>0.05
D3ZF11	D3ZF11_RAT	Hepatitis B virus x interacting protein (Predicted), isoform CRA_a (Protein Lamtor5)	Lamtor5 Hbxip_predicted rCG_28577	156	0.294082	0.149743	0.410216	0.227646	1.3949	0.774092	>0.05
D3ZF13	D3ZF13_RAT	Acyl carrier protein	LOC683884 Ndufab1_predicted rCG_40178	156	2.45693	0.402416	1.74651	0.270797	0.710849	0.110218	>0.05
D3ZF21	D3ZF21_RAT	Protein Gprin3	Gprin3	757	5.10294	0.308063	3.67019	0.394567	0.71923	0.0773215	<0.05
D3ZFB6	PRRT2_RAT	Proline-rich transmembrane protein 2 (Dispanin subfamily B member 3) (DSPB3)	Prrt2	344	1.46161	0.259655	0.915376	0.281176	0.626278	0.192373	>0.05
D3ZFD0	D3ZFD0_RAT	Uncharacterized protein	Myo18a	2044	0.68058	0.251851	0.511646	0.170578	0.751779	0.250637	>0.05
D3ZFY8	D3ZFY8_RAT	Protein LOC100362142	LOC100912618 LOC100362142	147	3.42989	0.27317	4.19625	0.281514	1.22344	0.0820768	>0.05
D3ZG43	D3ZG43_RAT	NADH dehydrogenase (Ubiquinone) Fe-S protein 3 (Predicted), isoform CRA_c (Protein Ndufs3)	Ndufs3 Ndufs3_predicted rCG_26180	264	7.43689	0.337763	7.4759	0.540853	1.00525	0.0727257	>0.05
D3ZGL0	D3ZGL0_RAT	GRIP1-associated protein 1	Gripap1	793	0.684966	0.208955	0.50759	0.225398	0.741044	0.329065	>0.05
D3ZGN2	D3ZGN2_RAT	Copine 5 protein (Copine V (Predicted)) (Protein Cpne5)	Cpne5 Cpne5_predicted rCG_60637	593	4.10552	0.436735	2.8589	0.419803	0.696355	0.102253	>0.05
D3ZGQ8	D3ZGQ8_RAT	Protein Rsf1	Rsf1	1444	2.24171	0.453124	2.03842	0.662398	0.909316	0.295488	>0.05
D3ZGS3	OCRL_RAT	Inositol polyphosphate 5-phosphatase OCRL-1 (EC 3.1.3.36)	Ocrl	902	0.580173	0.256443	0.20253	0.135025	0.349086	0.232732	>0.05
D3ZHI9	D3ZHI9_RAT	Protein Ppp2r5e (Protein phosphatase 2, regulatory subunit B (B56), epsilon isoform (Predicted))	Ppp2r5e Ppp2r5e_predicted rCG_62385	429	2.83678	0.302344	3.17456	0.3282	1.11907	0.115694	>0.05
D3ZHX3	D3ZHX3_RAT	Protein Diras2	Diras2	199	0.293356	0.149473	0.20109	0.20109	0.685481	0.685481	>0.05
D3ZHZ3	D3ZHZ3_RAT	Oxysterol-binding protein	Osbpl3 RGD1564287_predicted rCG_52333	855	0.291838	0.207305	0	0	0	0	>0.05
D3ZIE9	D3ZIE9_RAT	Protein Aldh18a1 (Pyrroline-5-carboxylate synthetase (Glutamate gamma-semialdehyde synthetase) (Predicted))	Aldh18a1 Pycs_predicted rCG_57763	795	0.976808	0.206466	0.10342	0.10342	0.105875	0.105875	<0.05
D3ZIP8	D3ZIP8_RAT	Protein Endod1 (RCG31867)	Endod1 rCG_31867	500	0.777666	0.129743	1.01907	0.26032	1.31042	0.334745	>0.05
D3ZJ01	D3ZJ01_RAT	Protein RGD1307235 (Similar to RIKEN cDNA 2310035C23 (Predicted))	RGD1307235 RGD1307235_predicted rCG_24062	1218	0.687696	0.2126	0.71683	0.266325	1.04236	0.387272	>0.05
D3ZJ08	D3ZJ08_RAT	Histone H3	Hist2h3c2 Hist1h2ail Hist1h2ail1 Hist1h3a Hist1h3c Hist1h3f Hist2h3c LOC102549173 LOC679994 LOC684762 LOC684819 LOC684841 rCG_45187 rCG_45215 rCG_51970	136	7.24036	0.365302	6.64407	0.566261	0.917644	0.078209	>0.05
D3ZJ32	D3ZJ32_RAT	Protein Esyt2	Esyt2	845	0.494982	0.222469	0	0	0	0	<0.05
D3ZJ77	D3ZJ77_RAT	Calcium binding protein 39 (Predicted), isoform CRA_a (Protein Cab39)	Cab39 Cab39_predicted rCG_23700	196	0.976823	0.384438	0.92562	0.1846	0.947582	0.18898	>0.05
D3ZJH9	D3ZJH9_RAT	Malic enzyme	Me2	584	0.77748	0.191854	0.20623	0.137487	0.265254	0.176837	<0.05
D3ZJM7	D3ZJM7_RAT	Protein Mcph1	Mcph1	816	0.293153	0.208962	0	0	0	0	>0.05
D3ZJR1	D3ZJR1_RAT	Epidermal growth factor receptor pathway substrate 15-like 1 (Protein Eps15l1)	Eps15l1 LOC361120	878	1.28425	0.469326	1.53244	0.228302	1.19325	0.17777	>0.05
D3ZJX5	D3ZJX5_RAT	Protein LOC687295 (RCG54610, isoform CRA_a)	Timm50 LOC687295 rCG_54610	353	1.76032	0.195344	1.2294	0.138891	0.698394	0.0789012	<0.05
D3ZKY6	D3ZKY6_RAT	Protein Ankrd63	Ankrd63	390	1.35441	0.317776	2.14991	0.286127	1.58735	0.211257	>0.05
D3ZL49	D3ZL49_RAT	Protein Hmg1l1	Hmg1l1 LOC100909581	215	3.81386	0.340697	4.50298	0.276948	1.18069	0.0726163	>0.05
D3ZLT1	D3ZLT1_RAT	NADH dehydrogenase (Ubiquinone) 1 beta subcomplex, 7 (Predicted) (Protein Ndufb7)	Ndufb7 Ndufb7_predicted rCG_51107	137	1.96146	0.25753	2.2424	0.331387	1.14323	0.168949	>0.05
D3ZLY9	D3ZLY9_RAT	Histone H2B	Hist1h2bh Hist1h2bf Hist1h2bl rCG_23123	126	23.9455	0.974582	23.1414	1.29735	0.96642	0.0541792	>0.05
D3ZM21	D3ZM21_RAT	Catechol-O-methyltransferase domain containing 1 (Predicted), isoform CRA_a (Protein Comtd1)	Comtd1 Comtd1_predicted rCG_41841	262	0.976498	0.146119	0.10452	0.10452	0.107036	0.107036	<0.05
D3ZN21	D3ZN21_RAT	Protein Ddx3y (RCG20177)	Ddx3y RGD1309586 rCG_20177	659	1.5582	0.152998	0.71983	0.268846	0.461963	0.172536	<0.05
D3ZNK1	D3ZNK1_RAT	Protein Mtx3	Mtx3 LOC688905	311	0.584289	0.214939	0.40948	0.16719	0.700818	0.286142	>0.05
D3ZNQ6	D3ZNQ6_RAT	Protein Ube2m (Ubiquitin-conjugating enzyme E2M (UBC12 homolog, yeast) (Predicted), isoform CRA_a)	Ube2m Ube2m_predicted rCG_27455	183	0.397324	0.221259	0.304686	0.155155	0.766845	0.390501	>0.05
D3ZP47	D3ZP47_RAT	Phosphohistidine phosphatase 1 (Predicted), isoform CRA_a (Protein Phpt1)	Phpt1 Phpt1_predicted rCG_45807	124	2.05338	0.425767	1.0216	0.30576	0.497521	0.148906	>0.05
D3ZPC4	D3ZPC4_RAT	Neural cell adhesion molecule L1	L1cam	1255	5.56638	0.489763	5.32075	0.452581	0.955873	0.0813061	>0.05
D3ZPJ0	D3ZPJ0_RAT	Protein Shisa7	Shisa7	558	0.783926	0.197002	0.610886	0.166319	0.779265	0.212162	>0.05
D3ZPU3	D3ZPU3_RAT	Estradiol 17-beta-dehydrogenase 12	Hsd17b12	290	1.37275	0.163033	1.02246	0.153334	0.744826	0.111699	>0.05
D3ZQD3	D3ZQD3_RAT	2-oxoglutarate dehydrogenase, mitochondrial (Oxoglutarate dehydrogenase-like (Predicted), isoform CRA_a)	Ogdhl Ogdhl_predicted rCG_42296	1029	2.72511	0.489133	2.7638	0.221527	1.0142	0.0812912	>0.05
D3ZQG6	TRIM2_RAT	Tripartite motif-containing protein 2 (EC 6.3.2.-) (E3 ubiquitin-protein ligase TRIM2)	Trim2	744	2.73364	0.239717	3.36971	0.522488	1.23268	0.191133	>0.05
D3ZQL7	D3ZQL7_RAT	Protein Tppp (Similar to 25 kDa brain-specific protein (P25-alpha) (Predicted), isoform CRA_a)	Tppp RGD1310121_predicted rCG_42002	218	16.8317	0.697956	17.6938	0.609939	1.05122	0.0362375	>0.05
D3ZQR3	D3ZQR3_RAT	Protein Arpp21	Arpp21	808	0.577235	0.21026	0.714676	0.155998	1.2381	0.27025	>0.05
D3ZR34	D3ZR34_RAT	Protein Psd3 (Fragment)	Psd3	1039	2.43466	0.363544	2.03842	0.298608	0.83725	0.122649	>0.05
D3ZR53	D3ZR53_RAT	Protein phosphatase 1 regulatory subunit 12	Ppp1r12a	1032	0.694534	0.211339	0.307806	0.156769	0.443183	0.225719	>0.05
D3ZRM9	D3ZRM9_RAT	60S ribosomal protein L13	LOC100360491	211	1.26258	0.287049	0.3086	0.157162	0.244419	0.124476	<0.05
D3ZRN3	D3ZRN3_RAT	Protein Actbl2 (Similar to cytoplasmic beta-actin (Predicted))	Actbl2 RGD1309504_predicted rCG_44795	376	98.9186	3.76256	109.377	3.02302	1.10573	0.0305607	<0.05
D3ZRX4	D3ZRX4_RAT	Microtubule-associated protein	Mapt	498	26.3193	0.687649	25.67	0.532103	0.97533	0.0202172	>0.05
D3ZS58	D3ZS58_RAT	NADH dehydrogenase [ubiquinone] 1 alpha subcomplex subunit 2	Ndufa2 Ndufa2_predicted rCG_49583	97	2.72775	0.401647	2.75378	0.254831	1.00954	0.0934219	>0.05
D3ZSN6	D3ZSN6_RAT	Kinesin-like protein (Fragment)	Kif21a	1614	3.02482	0.261657	3.77955	0.335826	1.24951	0.111024	>0.05
D3ZSY8	D3ZSY8_RAT	Protein Tbc1d10b (TBC1 domain family, member 10b (Predicted))	Tbc1d10b Tbc1d10b_predicted rCG_40210	795	1.46005	0.210324	1.12098	0.281184	0.767766	0.192585	>0.05
D3ZSZ6	D3ZSZ6_RAT	Diacylglycerol kinase (DAG kinase) (EC 2.7.1.107)	Dgkh	1155	0.595777	0.264928	0	0	0	0	<0.05
D3ZT16	D3ZT16_RAT	Protein Map6d1 (Putative uncharacterized protein RGD1560102_predicted)	Map6d1 RGD1560102_predicted rCG_36606	191	0.680562	0.148622	0.822756	0.258698	1.20894	0.380124	>0.05
D3ZT36	D3ZT36_RAT	Protein Adam23	Adam23	828	1.08053	0.274396	0.5033	0.224296	0.465788	0.207579	>0.05
D3ZTB5	D3ZTB5_RAT	Protein S100a13	S100a13	98	1.17972	0.196623	0	0	0	0	<0.05
D3ZU22	D3ZU22_RAT	Protein LOC100361311	LOC100361311 LOC100910109	266	2.5431	0.330346	1.73473	0.40259	0.68213	0.158307	>0.05
D3ZU84	D3ZU84_RAT	Protein Stxbp5l	Stxbp5l	1136	0.786333	0.197202	0.200406	0.133605	0.254861	0.169909	<0.05
D3ZUB0	D3ZUB0_RAT	Protein Rcn1 (Reticulocalbin 1 (Predicted), isoform CRA_a)	Rcn1 Rcn1_predicted rCG_26388	325	1.6555	0.349216	1.4281	0.162442	0.862639	0.0981226	>0.05
D3ZUP5	D3ZUP5_RAT	Protein Brk1 (RCG56448, isoform CRA_a)	Brk1 rCG_56448	75	0.88437	0.373554	0.507006	0.225915	0.573296	0.255453	>0.05
D3ZUX5	D3ZUX5_RAT	Coiled-coil-helix-coiled-coil-helix domain containing 3 (Predicted), isoform CRA_a (Protein Chchd3)	Chchd3 Chchd3_predicted rCG_28180	227	5.28757	0.369474	3.68128	0.528497	0.696214	0.0999508	<0.05
D3ZUY8	D3ZUY8_RAT	Adaptor protein complex AP-2, alpha 1 subunit (Predicted) (Protein Ap2a1)	Ap2a1 Ap2a1_predicted rCG_54084	977	18.4046	0.685793	16.148	0.696675	0.877389	0.0378533	<0.05
D3ZV39	D3ZV39_RAT	Protein Armcx4	Armcx4	2344	0.098787	0.098787	0.41303	0.228592	4.18102	2.31399	>0.05
D3ZVF3	D3ZVF3_RAT	Phosphoinositide-3-kinase, class 2, beta polypeptide (Predicted) (Protein Pik3c2b)	Pik3c2b Pik3c2b_predicted rCG_46177	1621	0.20019	0.20019	0.10343	0.10343	0.516659	0.516659	>0.05
D3ZVN3	D3ZVN3_RAT	F-box only protein 10 (Predicted), isoform CRA_a (Protein Fbxo10)	Fbxo10 Fbxo10_predicted rCG_55077	950	0.296863	0.212261	0.408726	0.16689	1.37682	0.562179	>0.05
D3ZVQ0	D3ZVQ0_RAT	Ubiquitin carboxyl-terminal hydrolase (EC 3.4.19.12)	Usp5 LOC100911959 Usp5_predicted rCG_29800	858	8.70188	0.29485	7.37009	0.483115	0.846954	0.0555185	<0.05
D3ZW08	D3ZW08_RAT	Adenylosuccinate lyase (ASL) (EC 4.3.2.2) (Adenylosuccinase)	Adsl Adsl_predicted rCG_60301	484	1.96053	0.211144	1.3256	0.150765	0.676142	0.0768999	<0.05
D3ZW55	ITPA_RAT	Inosine triphosphate pyrophosphatase (ITPase) (Inosine triphosphatase) (EC 3.6.1.19) (Non-canonical purine NTP pyrophosphatase) (Non-standard purine NTP pyrophosphatase) (Nucleoside-triphosphate diphosphatase) (Nucleoside-triphosphate pyrophosphatase) (NTPase)	Itpa	198	3.33265	0.271614	2.96484	0.235583	0.889634	0.0706892	>0.05
D3ZWQ0	D3ZWQ0_RAT	Protein Prrt3	Prrt3	974	0.787923	0.131431	1.12449	0.184039	1.42715	0.233574	>0.05
D3ZWV7	D3ZWV7_RAT	Succinate-semialdehyde dehydrogenase, mitochondrial	Aldh5a1	495	13.8857	0.633567	13.0828	0.556269	0.942179	0.0400606	>0.05
D3ZX10	D3ZX10_RAT	Protein Bahcc1 (Fragment)	Bahcc1	2596	0.48212	0.212955	0	0	0	0	<0.05
D3ZX82	D3ZX82_RAT	Cytoplasmic FMR1 interacting protein 2 (Predicted) (Protein Cyfip2)	Cyfip2 Cyfip2_predicted rCG_35313	593	3.90344	0.317799	3.06349	0.256772	0.784818	0.0657811	>0.05
D3ZY46	D3ZY46_RAT	Engulfment and cell motility 1, ced-12 homolog (C. elegans) (Predicted), isoform CRA_a (Protein Elmo1)	Elmo1 Elmo1_predicted rCG_23103	727	0.197883	0.131955	0.70954	0.214818	3.58565	1.08558	>0.05
D3ZYH3	D3ZYH3_RAT	Protein LOC100912928 (RCG22822)	LOC100912928 Nudt10 Nudt11 rCG_22822	164	0.597574	0.30721	0.509236	0.169778	0.852172	0.284112	>0.05
D3ZZ21	D3ZZ21_RAT	NADH dehydrogenase (Ubiquinone) 1 beta subcomplex, 6 (Predicted) (Protein Ndufb6)	Ndufb6 Ndufb6_predicted rCG_55056	128	3.03836	0.187516	2.66001	0.311984	0.875476	0.102682	>0.05
D3ZZK3	D3ZZK3_RAT	Receptor protein-tyrosine kinase (EC 2.7.10.1)	Epha4	986	1.46981	0.16535	1.01994	0.261335	0.693926	0.177802	>0.05
D3ZZM9	D3ZZM9_RAT	Protein Ccsap (Similar to 1700054N08Rik protein (Predicted))	Ccsap RGD1563235_predicted rCG_50909	252	0.489176	0.218911	0.203386	0.135618	0.415773	0.277238	>0.05
D3ZZQ0	D3ZZQ0_RAT	Protein Tnik (Similar to Traf2 and NCK interacting kinase, splice variant 4 (Predicted), isoform CRA_a)	Tnik RGD1561817_predicted rCG_41596	1354	1.07645	0.0982434	0.40526	0.222578	0.376479	0.206771	<0.05
D3ZZR9	D3ZZR9_RAT	Peptidyl-prolyl cis-trans isomerase	Fkbp2 Fkbp2_predicted rCG_47860	140	0.691155	0.257481	0.40989	0.167356	0.593051	0.242139	>0.05
D4A055	D4A055_RAT	Calcium channel, voltage-dependent, beta 4 subunit, isoform CRA_b (Protein Cacnb4)	Cacnb4 rCG_37774	486	0.683242	0.211929	1.12751	0.283261	1.65024	0.414584	>0.05
D4A0A1	D4A0A1_RAT	Protein LOC100363248	Soga3 LOC100363248	944	2.25265	0.25304	2.96366	0.234987	1.31563	0.104316	>0.05
D4A0E2	D4A0E2_RAT	Protein Napg (RCG46917, isoform CRA_b)	Napg rCG_46917	230	9.18731	0.393043	8.07968	0.461302	0.879439	0.0502108	>0.05
D4A0H4	D4A0H4_RAT	Cullin 2 (Predicted), isoform CRA_a (Protein Cul2)	Cul2 Cul2_predicted rCG_45320	725	0.971266	0.139807	0.6097	0.222959	0.627737	0.229555	>0.05
D4A0I5	D4A0I5_RAT	DnaJ (Hsp40) homolog, subfamily C, member 6 (Predicted) (Protein Dnajc6)	Dnajc6 Dnajc6_predicted rCG_53429	911	2.93237	0.355255	2.96097	0.317919	1.00975	0.108417	>0.05
D4A0T0	D4A0T0_RAT	Protein Ndufb10 (RCG32945)	Ndufb10 rCG_32945	176	7.32575	0.25869	7.47054	0.34671	1.01976	0.0473275	>0.05
D4A0X3	D4A0X3_RAT	Protein Btbd8	Btbd8 LOC100364240	1367	0.394767	0.161192	1.02106	0.215965	2.58648	0.547069	<0.05
D4A133	D4A133_RAT	Protein Atp6v1a (RCG52629)	Atp6v1a rCG_52629	617	51.6141	1.08857	48.625	1.50729	0.942088	0.029203	>0.05
D4A148	D4A148_RAT	Uncharacterized protein	Zfr2	872	0.094785	0.094785	0.20506	0.20506	2.16342	2.16342	>0.05
D4A1A5	D4A1A5_RAT	Protein Ppp2r5c	Ppp2r5c	524	1.57341	0.265796	1.73858	0.155677	1.10497	0.0989423	>0.05
D4A1G1	D4A1G1_RAT	Acylphosphatase (EC 3.6.1.7)	Acyp2 rCG_23240	124	1.36132	0.150567	0.71739	0.218803	0.526981	0.160728	<0.05
D4A1G8	D4A1G8_RAT	Protein Cep170b	Cep170b	1575	0.676205	0.290641	1.53956	0.353036	2.27677	0.522084	>0.05
D4A2G9	D4A2G9_RAT	Protein RGD1565297 (RCG36598)	Ranbp1 RGD1565297 rCG_36598	203	1.07479	0.268827	0.713726	0.2162	0.66406	0.201155	>0.05
D4A3B0	D4A3B0_RAT	Protein Tln2	Tln2	2132	2.04007	0.494987	2.04745	0.484453	1.00362	0.237469	>0.05
D4A3C2	D4A3C2_RAT	Protein RGD1304884 (Similar to RIKEN cDNA 6430548M08 (Predicted), isoform CRA_b)	RGD1304884 RGD1304884_predicted rCG_51327	407	2.25557	0.217245	1.94056	0.179346	0.860341	0.0795124	>0.05
D4A3V2	D4A3V2_RAT	NADH dehydrogenase [ubiquinone] 1 alpha subcomplex subunit 6	Ndufa6 Ndufa6_predicted rCG_59408	130	3.1205	0.231259	1.12879	0.323563	0.361734	0.10369	<0.05
D4A3Z3	D4A3Z3_RAT	Protein Tbc1d24 (Similar to CG9339-PA (Predicted))	Tbc1d24 RGD1306143_predicted rCG_35255	556	0.877711	0.17567	0.510136	0.170084	0.581212	0.193781	>0.05
D4A435	D4A435_RAT	Protein Icam5 (RCG31795)	Icam5 rCG_31795	917	6.94409	0.493993	6.65034	0.488375	0.957698	0.0703295	>0.05
D4A4T9	CHRD1_RAT	Cysteine and histidine-rich domain-containing protein 1 (CHORD domain-containing protein 1) (CHP-1) (Morgana)	Chordc1	331	3.40215	0.546361	2.9657	0.23709	0.871714	0.0696883	>0.05
D4A565	D4A565_RAT	NADH dehydrogenase (Ubiquinone) 1 beta subcomplex, 5 (Predicted), isoform CRA_b (Protein Ndufb5)	Ndufb5 Ndufb5_predicted rCG_41492	189	4.1974	0.236974	3.98561	0.231087	0.949543	0.0550548	>0.05
D4A5I9	D4A5I9_RAT	Protein Myo6	Myo6	1261	0.974089	0.139857	0.920076	0.185057	0.94455	0.189979	>0.05
D4A5L9	D4A5L9_RAT	Protein LOC690675	LOC679794 LOC684936 LOC690675	105	16.2329	0.64563	17.9068	0.366349	1.10312	0.0225683	<0.05
D4A5X7	D4A5X7_RAT	Ganglioside-induced differentiation-associated-protein 1 (Predicted) (Protein Gdap1)	Gdap1 Gdap1_predicted rCG_30362	358	2.14051	0.270868	2.45241	0.269949	1.14572	0.126114	>0.05
D4A644	D4A644_RAT	Protein Map7d1 (RCG31495)	Map7d1 rCG_31495	817	0.585875	0.216219	0.91691	0.281659	1.56503	0.480749	>0.05
D4A6C5	D4A6C5_RAT	Protein Arhgap1	Arhgap1	439	1.46009	0.215457	0.71374	0.265493	0.488832	0.181833	<0.05
D4A6C9	D4A6C9_RAT	Protein Tom1l2 (Target of myb1-like 2 (Chicken) (Predicted), isoform CRA_a)	Tom1l2 Tom1l2_predicted rCG_33818	284	0.292666	0.149118	0.51044	0.226776	1.7441	0.774863	>0.05
D4A6H8	D4A6H8_RAT	Protein Ctnna2 (Fragment)	Ctnna2	922	5.76706	0.506993	5.94125	0.816984	1.0302	0.141664	>0.05
D4A6K9	D4A6K9_RAT	Active BCR-related gene (Predicted) (Protein Abr)	Abr Abr_predicted rCG_33397	859	1.07577	0.371456	0.8168	0.254503	0.759273	0.236579	>0.05
D4A6X4	D4A6X4_RAT	Acylphosphatase (EC 3.6.1.7)	Acyp1 Acyp1_predicted rCG_20688	99	0.980538	0.149408	0.613906	0.16714	0.626091	0.170457	>0.05
D4A746	D4A746_RAT	GDP-mannose pyrophosphorylase B (Predicted), isoform CRA_a (Protein Gmppb)	Gmppb Gmppb_predicted rCG_25921	360	1.07732	0.100081	0.612656	0.166784	0.568686	0.154814	<0.05
D4A781	D4A781_RAT	Protein Ipo5	Ipo5	1097	1.07146	0.172651	1.22296	0.201111	1.14139	0.187698	>0.05
D4A7B4	D4A7B4_RAT	Protein LOC100360611	LOC100360611	160	0.678879	0.148248	0.20904	0.20904	0.307919	0.307919	>0.05
D4A7H9	D4A7H9_RAT	CHMP family, member 7 (Predicted), isoform CRA_a (Protein Chmp7)	Chmp7 Chmp7_predicted rCG_37053	450	0.200869	0.133915	0.20904	0.20904	1.04068	1.04068	>0.05
D4A7L4	D4A7L4_RAT	NADH dehydrogenase (Ubiquinone) 1 beta subcomplex, 11 (Predicted) (Protein Ndufb11)	Ndufb11 Ndufb11_predicted rCG_42934	151	2.15988	0.388521	1.84494	0.337113	0.854184	0.15608	>0.05
D4A7N1	MIC25_RAT	MICOS complex subunit Mic25 (Coiled-coil-helix-coiled-coil-helix domain-containing protein 6)	Chchd6 Mic25	261	2.15397	0.250569	1.73613	0.214533	0.806014	0.099599	>0.05
D4A830	D4A830_RAT	Protein Ppa2	Ppa2	304	1.47864	0.341718	1.4291	0.346862	0.966494	0.234581	>0.05
D4A8H8	D4A8H8_RAT	Cytoplasmic FMR1 interacting protein 1 (Predicted) (Protein Cyfip1)	Cyfip1 Cyfip1_predicted rCG_45119	1253	5.38602	0.501526	4.38816	0.389645	0.814731	0.0723437	>0.05
D4A8U7	D4A8U7_RAT	Dynactin 1, isoform CRA_a (Dynactin subunit 1)	Dctn1 rCG_56074	1281	5.76676	0.369571	4.60856	0.352665	0.799159	0.0611548	<0.05
D4A9D6	D4A9D6_RAT	DEAH (Asp-Glu-Ala-His) box polypeptide 9 (Predicted) (Protein Dhx9)	Dhx9 Dhx9_predicted rCG_46521	1174	1.16889	0.242343	0.715476	0.218813	0.612099	0.187197	>0.05
D4A9D8	D4A9D8_RAT	Oxysterol-binding protein	Osbp Osbp_predicted rCG_47114	682	2.35064	0.263976	1.73251	0.259058	0.737039	0.110208	>0.05
D4A9H7	D4A9H7_RAT	Protein Spata2L (Similar to RIKEN cDNA 2610039E05 (Predicted), isoform CRA_a)	Spata2L RGD1560840_predicted rCG_51414	426	1.95708	0.0145825	1.43469	0.169595	0.733075	0.086657	<0.05
D4A9L2	D4A9L2_RAT	Protein Srsf1 (RCG34610, isoform CRA_c)	Srsf1 rCG_34610	248	0.687265	0.210239	1.01932	0.299779	1.48315	0.436191	>0.05
D4AA63	D4AA63_RAT	Protein Ubqln2 (Ubiquilin 2 (Predicted))	Ubqln2 Ubqln2_predicted rCG_38924	638	4.88824	0.405459	5.32222	0.372893	1.08878	0.0762837	>0.05
D4AAE9	D4AAE9_RAT	Protein Cisd2 (Similar to RIKEN cDNA 1500009M05 (Predicted))	Cisd2 RGD1566242_predicted rCG_28708	135	1.57064	0.220233	1.94355	0.102182	1.23742	0.0650577	>0.05
D4AB01	D4AB01_RAT	Histidine triad nucleotide binding protein 2 (Predicted), isoform CRA_a (Protein Hint2)	Hint2 Hint2_predicted rCG_54875	163	1.26381	0.35457	2.45779	0.229049	1.94474	0.181237	<0.05
D4AB03	D4AB03_RAT	Protein Fam120a	Fam120a	1115	0.389414	0.214869	0.61732	0.168043	1.58525	0.431529	>0.05
D4AB17	D4AB17_RAT	Protein LOC100912917	LOC100912917 Pfas	1273	0.192172	0.128129	0.504986	0.225408	2.62778	1.17295	>0.05
D4AB25	D4AB25_RAT	Protein Fjx1 (RCG27341)	Fjx1 rCG_27341	449	0	0	0.20405	0.20405	N/A	N/A	>0.05
D4ABF0	D4ABF0_RAT	Synaptonemal complex protein SC65	P3h4 Leprel4	431	0.098097	0.098097	0.20109	0.20109	2.04991	2.04991	>0.05
D4ABI7	D4ABI7_RAT	Protein LOC100365676 (Similar to Butyrate-induced transcript 1 (Predicted))	LOC100365676 Ptplad1 RGD1565496_predicted rCG_58140	362	0.093649	0.093649	0.61268	0.272523	6.5423	2.91005	>0.05
D4ABT8	D4ABT8_RAT	Protein Hnrnpul2	Hnrnpul2	745	0.680323	0.208464	0.820726	0.206172	1.20638	0.30305	>0.05
D4AC23	D4AC23_RAT	Protein Cct7 (RCG55994, isoform CRA_c)	Cct7 rCG_55994	544	3.23291	0.300894	4.19123	0.277209	1.29643	0.085746	<0.05
D4ACB8	D4ACB8_RAT	Chaperonin subunit 8 (Theta) (Predicted), isoform CRA_a (Protein Cct8)	Cct8 Cct8_predicted rCG_58706	548	6.47587	0.478202	8.07849	0.483108	1.24748	0.0746013	<0.05
D4ADS4	D4ADS4_RAT	Protein Mgst3 (RCG46430)	Mgst3 rCG_46430	152	1.75762	0.31869	1.63145	0.161828	0.928215	0.092072	>0.05
D4AE00	D4AE00_RAT	AP-3 complex subunit beta	Ap3b2	1082	2.81737	0.459781	2.65491	0.406484	0.942338	0.144278	>0.05
D4AE68	D4AE68_RAT	Guanine nucleotide binding protein, alpha q polypeptide, isoform CRA_a (Guanine nucleotide-binding protein G(q) subunit alpha)	Gnaq rCG_47814	359	8.59753	0.377686	7.97103	0.349787	0.92713	0.0406846	>0.05
D4AEP0	D4AEP0_RAT	Adenylosuccinate synthetase isozyme 2 (AMPSase 2) (AdSS 2) (EC 6.3.4.4) (Adenylosuccinate synthetase, acidic isozyme) (Adenylosuccinate synthetase, liver isozyme) (IMP--aspartate ligase 2)	Adss Adss2 Adss_predicted rCG_20425	456	1.56204	0.216498	0.8204	0.334473	0.525211	0.214126	>0.05
E9PSX6	E9PSX6_RAT	Calcium-transporting ATPase (EC 3.6.3.8)	Atp2a2	999	16.1453	0.593102	17.591	0.547005	1.08954	0.0338801	>0.05
E9PT22	E9PT22_RAT	Uncharacterized protein	0	1271	0.596229	0.22132	0.714066	0.216212	1.19764	0.362633	>0.05
E9PT53	E9PT53_RAT	Protein Wfs1 (Wolfram syndrome 1 homolog (Human))	Wfs1 rCG_36058	890	0.583569	0.215234	0.20455	0.136367	0.350516	0.233678	>0.05
E9PTD2	E9PTD2_RAT	Phosphatidylinositol-binding clathrin assembly protein	Picalm	597	5.08786	0.320312	4.81007	0.308732	0.945401	0.0606801	>0.05
E9PTK8	E9PTK8_RAT	Protein Lmo7	Lmo7	1726	1.76593	0.288221	0.611306	0.225442	0.346167	0.127662	<0.05
E9PTW1	E9PTW1_RAT	Protein Scamp3	Scamp3	350	2.05544	0.229291	2.05024	0.311971	0.997468	0.151778	>0.05
E9PTX9	E9PTX9_RAT	Protein Slc12a2	Slc12a2	1203	1.6548	0.198953	1.63616	0.273815	0.988736	0.165467	>0.05
E9PU16	E9PU16_RAT	Ras-related protein Rab-1A	Rab1	300	12.4361	0.425616	12.7855	0.506553	1.0281	0.0407326	>0.05
E9PU24	E9PU24_RAT	Protein Dnah11 (Fragment)	Dnah11	2808	0.20184	0.20184	0.10343	0.10343	0.512436	0.512436	>0.05
F1LM19	F1LM19_RAT	Alpha-2-HS-glycoprotein	Ahsg	351	1.17029	0.124737	2.75827	0.335949	2.35692	0.287066	<0.05
F1LM33	F1LM33_RAT	Leucine-rich PPR motif-containing protein, mitochondrial (Leucine-rich PPR-motif containing, isoform CRA_b)	Lrpprc rCG_61623	1392	3.04054	0.375444	2.55575	0.167315	0.840559	0.0550282	>0.05
F1LM42	F1LM42_RAT	Protein Ank2	Ank2	3965	30.8617	1.16775	28.7521	0.931767	0.931643	0.0301917	>0.05
F1LM47	F1LM47_RAT	Succinyl-CoA ligase subunit beta (EC 6.2.1.-)	Sucla2	465	14.9946	0.603772	12.7928	0.471615	0.853158	0.0314523	<0.05
F1LMC2	F1LMC2_RAT	Xin actin-binding repeat-containing protein 2	Xirp2	3302	0.094785	0.094785	0.921496	0.239275	9.72196	2.5244	<0.05
F1LMH0	F1LMH0_RAT	Neuronal-specific septin-3 (Fragment)	42250	358	3.72772	0.489564	5.62922	0.440302	1.5101	0.118116	<0.05
F1LMS1	F1LMS1_RAT	Voltage-dependent R-type calcium channel subunit alpha-1E	Cacna1e	2296	1.27355	0.151488	1.42775	0.379032	1.12108	0.297619	>0.05
F1LMV8	F1LMV8_RAT	Protein kinase C (EC 2.7.11.13)	Prkce	736	4.80229	0.247946	5.02113	0.478632	1.04557	0.0996674	>0.05
F1LMZ8	PSD11_RAT	26S proteasome non-ATPase regulatory subunit 11 (26S proteasome regulatory subunit RPN6)	Psmd11	422	0.1999	0.1999	0	0	0	0	>0.05
F1LN76	F1LN76_RAT	Protein Cfap43 (Fragment)	Cfap43 Wdr96	1665	0.492375	0.222713	0.10202	0.10202	0.2072	0.2072	>0.05
F1LN88	F1LN88_RAT	Aldehyde dehydrogenase, mitochondrial (RCG21519, isoform CRA_a)	Aldh2 rCG_21519	519	8.0074	0.499742	6.44261	0.568125	0.804582	0.07095	>0.05
F1LN92	F1LN92_RAT	Protein Afg3l2	Afg3l2	802	0.196005	0.13067	0.713286	0.217646	3.63912	1.11041	>0.05
F1LNB2	F1LNB2_RAT	Phosphatase and actin regulator	Phactr1	580	7.14745	0.535159	8.08026	0.353066	1.13051	0.0493974	>0.05
F1LNK0	F1LNK0_RAT	Microtubule-associated protein	Map2	1860	76.0411	1.54909	75.4878	1.62279	0.992724	0.0213409	>0.05
F1LNR0	F1LNR0_RAT	Protein Clasp1	Clasp1	1471	0.876752	0.226384	0.92011	0.237609	1.04945	0.271011	>0.05
F1LP01	F1LP01_RAT	Diacylglycerol kinase (DAG kinase) (EC 2.7.1.107)	Dgkb rCG_62181	802	8.70622	0.511526	8.50065	0.453749	0.976388	0.0521177	>0.05
F1LP21	F1LP21_RAT	Protein Timm8a1	Timm8a1	97	1.6607	0.327871	0.61962	0.227883	0.373108	0.137221	<0.05
F1LPB9	F1LPB9_RAT	Rabphilin-3A	Rph3a	684	15.1653	0.427347	12.2788	0.31487	0.809664	0.0207625	<0.05
F1LPG5	F1LPG5_RAT	Protein LOC691675	LOC688963 LOC691675	129	3.51445	0.354701	2.3491	0.398775	0.668412	0.113467	<0.05
F1LPM3	F1LPM3_RAT	Sorbin and SH3 domain-containing protein 2	Sorbs2	1196	0.384966	0.21355	0.714676	0.155998	1.85647	0.405225	>0.05
F1LPP3	F1LPP3_RAT	Protein kinase C and casein kinase substrate in neurons protein 1	Pacsin1	441	30.9282	0.583313	31.6075	0.546063	1.02196	0.0176558	>0.05
F1LPP6	F1LPP6_RAT	A-kinase anchor protein 5	Akap5	714	14.2946	0.685611	14.3091	0.707144	1.00101	0.0494693	>0.05
F1LPS8	F1LPS8_RAT	Transcriptional activator protein Pur-alpha	Pura	303	6.65131	0.31899	5.53004	0.239332	0.831421	0.0359826	<0.05
F1LPV0	F1LPV0_RAT	Protein Nars (RCG46601, isoform CRA_b)	Nars rCG_46601	558	3.70836	0.393766	3.38846	0.493044	0.913735	0.132955	>0.05
F1LPV8	F1LPV8_RAT	Succinyl-CoA ligase subunit beta (EC 6.2.1.-)	Suclg2	431	0.776535	0.191746	0.303836	0.154732	0.391271	0.199259	>0.05
F1LQ48	F1LQ48_RAT	Protein Fblim1	Hnrnpl Fblim1	623	6.37163	0.505782	6.34071	0.387569	0.995147	0.0608273	>0.05
F1LQI1	F1LQI1_RAT	Hydroxyacyl glutathione hydrolase (Hydroxyacylglutathione hydrolase, mitochondrial)	Hagh rCG_35488	309	1.97642	0.394295	1.33331	0.437181	0.674608	0.221199	>0.05
F1LQQ1	F1LQQ1_RAT	Malic enzyme (Fragment)	Me1	549	1.06534	0.221644	0.81765	0.2532	0.767504	0.237672	>0.05
F1LQW3	F1LQW3_RAT	Protein Sfpq (Fragment)	Sfpq	606	1.66354	0.209379	2.75311	0.517788	1.65497	0.311256	>0.05
F1LQX4	RHG44_RAT	Rho GTPase-activating protein 44 (Rho-type GTPase-activating protein RICH2) (RhoGAP interacting with CIP4 homologs protein 2) (RICH-2)	Arhgap44 Rich2	814	0.580189	0.157981	0.30859	0.219204	0.531878	0.377815	>0.05
F1LQY6	F1LQY6_RAT	EF hand calcium binding protein 2 (Protein Necab2)	Necab2 Efcbp2 rCG_51128	352	2.05293	0.268664	2.45167	0.270004	1.19423	0.131521	>0.05
F1LR80	F1LR80_RAT	CaM kinase-like vesicle-associated protein	Camkv	504	17.7142	0.662435	16.9865	0.708517	0.95892	0.0399971	>0.05
F1LRB8	F1LRB8_RAT	S-adenosylmethionine synthase (EC 2.5.1.6)	LOC100363915 rCG_56483	395	1.36019	0.204427	1.63332	0.224992	1.20081	0.165413	>0.05
F1LRI7	F1LRI7_RAT	AP2-associated protein kinase 1	Aak1	963	13.8688	0.436835	13.8071	0.665704	0.995551	0.0480001	>0.05
F1LRJ2	F1LRJ2_RAT	Protein Srrm2	Srrm2	2707	0.192882	0.128612	0.411446	0.228144	2.13315	1.18282	>0.05
F1LRK0	F1LRK0_RAT	Clathrin coat assembly protein AP180	Snap91	919	24.1329	0.83984	19.7548	0.861282	0.818584	0.0356891	<0.05
F1LRL9	F1LRL9_RAT	Microtubule-associated protein 1B	Map1b	2461	45.4201	1.07245	46.958	1.14813	1.03386	0.025278	>0.05
F1LRV6	F1LRV6_RAT	GMP reductase (EC 1.7.1.7)	Gmpr	345	1.27156	0.211706	2.04636	0.00980535	1.60933	0.00771129	<0.05
F1LRW9	F1LRW9_RAT	Phosphatidylinositol 4-kinase alpha	Pi4ka	2044	0.583653	0.15899	1.73456	0.339846	2.9719	0.582274	<0.05
F1LRZ7	F1LRZ7_RAT	Neurofilament heavy polypeptide	Nefh	1064	25.9345	0.56501	24.0525	0.580441	0.927433	0.022381	<0.05
F1LSE0	F1LSE0_RAT	Protein Dnah2 (Fragment)	Dnah2	4371	0.191746	0.127874	0.19971	0.19971	1.04153	1.04153	>0.05
F1LSE6	F1LSE6_RAT	Liprin-alpha-3	Ppfia3	1192	4.77416	0.631186	4.09583	0.408685	0.857916	0.0856035	>0.05
F1LSL8	F1LSL8_RAT	Protein Sptbn4	Sptbn4	2561	0.672254	0.318317	0.10452	0.10452	0.155477	0.155477	>0.05
F1LSM5	F1LSM5_RAT	Nck-associated protein 1 (Fragment)	Nckap1	1093	2.75927	0.51099	3.37487	0.428368	1.2231	0.155247	>0.05
F1LT49	F1LT49_RAT	Protein Lrrc47	Lrrc47	580	0.780393	0.241129	0.9242	0.185278	1.18428	0.237417	>0.05
F1LTD7	F1LTD7_RAT	Protein Dennd4c	Dennd4c	1603	0.198046	0.132038	0.41023	0.227661	2.07139	1.14954	>0.05
F1LU71	F1LU71_RAT	AU RNA binding protein/enoyl-coenzyme A hydratase (Predicted), isoform CRA_a (Protein Auh)	Auh Auh_predicted rCG_44030	315	2.4453	0.162733	3.7916	0.381164	1.55057	0.155876	<0.05
F1LUA1	F1LUA1_RAT	Protein Eea1 (Fragment)	Eea1	1411	3.6122	0.316469	3.47837	0.226623	0.962951	0.0627382	>0.05
F1LUD4	F1LUD4_RAT	Protein Fnip1	Fnip1 LOC100362347	1164	0.491575	0.219631	0	0	0	0	<0.05
F1LUT4	F1LUT4_RAT	Phospholipid-translocating ATPase (EC 3.6.3.1) (Fragment)	Atp8a1	1133	3.03091	0.531896	3.4671	0.398045	1.14391	0.131329	>0.05
F1LV89	F1LV89_RAT	Protein Rap1gap (RAP1, GTPase activating protein 1, isoform CRA_a)	Rap1gap Rap1ga1 rCG_31337	727	6.55609	0.395414	4.09454	0.37444	0.62454	0.0571133	<0.05
F1LVC3	F1LVC3_RAT	Protein Rab6b (RAB6B, member RAS oncogene family (Predicted))	Rab6b Rab6b_predicted rCG_25123	175	7.84078	0.389718	7.36046	0.443194	0.938741	0.0565243	>0.05
F1LVL5	F1LVL5_RAT	Protein Shroom4	Shroom4	1487	0.19582	0.19582	0.20795	0.138636	1.06194	0.707975	>0.05
F1LVR4	F1LVR4_RAT	Protein Camk1d (Fragment)	Camk1d	383	0.881457	0.179675	1.32539	0.307393	1.50363	0.348733	>0.05
F1LW91	F1LW91_RAT	Protein Numa1 (Fragment)	Numa1	2078	0.889326	0.233764	0.61188	0.224067	0.688027	0.251952	>0.05
F1LWD6	F1LWD6_RAT	Uncharacterized protein (Fragment)	0	298	0.289839	0.207793	0.20304	0.135368	0.700527	0.467047	>0.05
F1LX07	F1LX07_RAT	Protein Slc25a12 (Fragment)	Slc25a12 LOC100360985	675	26.994	0.583743	24.9683	1.1685	0.924957	0.0432875	>0.05
F1LX22	F1LX22_RAT	Protein LOC100909950	Pip4k2a LOC100909950	403	1.95556	0.250486	3.07381	0.269694	1.57183	0.137911	<0.05
F1LXA0	F1LXA0_RAT	NADH dehydrogenase (Ubiquinone) 1 alpha subcomplex, 12 (Predicted), isoform CRA_b (Protein LOC100910710)	Ndufa12 LOC100910710 Ndufa12_predicted rCG_49121	145	5.07901	0.393581	4.40121	0.407376	0.866549	0.0802078	>0.05
F1LXD9	F1LXD9_RAT	Protein Ccdc180 (Fragment)	Ccdc180 LOC100910460	1640	0.20019	0.20019	0.10202	0.10202	0.509616	0.509616	>0.05
F1LXU4	F1LXU4_RAT	Protein Nbea (Fragment)	Nbea	1382	2.83343	0.306788	2.24475	0.195326	0.792238	0.0689361	>0.05
F1LY09	F1LY09_RAT	Protein Actr3b (Fragment)	Actr3b	315	1.66976	0.215431	1.22824	0.137252	0.735575	0.0821986	>0.05
F1LYA6	F1LYA6_RAT	Protein Abi2	Abi2	534	1.27607	0.257236	1.32749	0.218446	1.0403	0.171187	>0.05
F1LYK3	F1LYK3_RAT	Protein LOC685707	Nav1 LOC685707	1875	0.193572	0.129082	0.51933	0.279321	2.68288	1.44298	>0.05
F1LYS1	F1LYS1_RAT	Regulating synaptic membrane exocytosis protein 1	Rims1	1553	1.86765	0.274401	1.7366	0.153895	0.929833	0.0824005	>0.05
F1LZ64	F1LZ64_RAT	Protein Abhd12b	Abhd12b	212	0.20019	0.20019	0.20805	0.138702	1.03926	0.692852	>0.05
F1M0Z1	F1M0Z1_RAT	Protein Trio	Trio	3104	0.772946	0.405462	0.82031	0.257384	1.06128	0.332992	>0.05
F1M0Z3	F1M0Z3_RAT	Copine IV (Predicted), isoform CRA_a (Protein Cpne4)	Cpne4 Cpne4_predicted rCG_25293	567	1.56416	0.212573	1.84179	0.296652	1.1775	0.189656	>0.05
F1M111	F1M111_RAT	Protein Myo5c	Myo5c	1742	0.584631	0.25996	0.10055	0.10055	0.171989	0.171989	>0.05
F1M2D3	F1M2D3_RAT	Uncharacterized protein	Vdac1	282	26.9728	0.587806	26.5988	0.801389	0.986134	0.029711	>0.05
F1M386	RPGF2_RAT	Rap guanine nucleotide exchange factor 2 (Cyclic nucleotide ras GEF) (CNrasGEF) (Neural RAP guanine nucleotide exchange protein) (nRap GEP) (PDZ domain-containing guanine nucleotide exchange factor 1) (PDZ-GEF1) (RA-GEF-1) (Ras/Rap1-associating GEF-1)	Rapgef2 Pdzgef1	1496	2.16086	0.392725	2.14908	0.472809	0.99455	0.218806	>0.05
F1M392	F1M392_RAT	Protein Limch1	Limch1	1085	0.396715	0.221117	0.20507	0.136745	0.51692	0.344694	>0.05
F1M3D3	F1M3D3_RAT	Heterogeneous nuclear ribonucleoprotein M	Hnrnpm	729	1.27464	0.152808	1.43794	0.352542	1.12811	0.276582	>0.05
F1M3H8	F1M3H8_RAT	Protein Hnrnpa0	Hnrnpa0	303	1.17341	0.129432	1.02119	0.152902	0.870269	0.130305	>0.05
F1M3W5	F1M3W5_RAT	Protein Dmxl2 (Fragment)	Dmxl2	2244	5.76738	0.48521	5.81776	0.59634	1.00874	0.103399	>0.05
F1M403	F1M403_RAT	Protein Ube2o (Fragment)	Ube2o	1287	1.2773	0.300992	1.53697	0.231029	1.20329	0.180873	>0.05
F1M471	F1M471_RAT	Protein Epm2aip1	Epm2aip1	474	1.46223	0.262982	1.33105	0.157593	0.910282	0.107776	>0.05
F1M4K6	F1M4K6_RAT	Leucine-rich repeat-containing protein 7 (Fragment)	Lrrc7	1494	3.2185	0.278504	2.24496	0.249951	0.697517	0.0776606	<0.05
F1M4Q3	F1M4Q3_RAT	Protein Hmcn1	Hmcn1	5190	0.098097	0.098097	0.403476	0.222714	4.11303	2.27035	>0.05
F1M542	F1M542_RAT	Protein Adam22	Adam22	879	3.12243	0.376687	2.45776	0.314768	0.787131	0.100809	>0.05
F1M5N4	F1M5N4_RAT	Malic enzyme	Me3	605	7.33033	0.482144	5.82128	0.445033	0.794136	0.0607112	<0.05
F1M649	NLRC4_RAT	NLR family CARD domain-containing protein 4 (Ice protease-activating factor) (Ipaf)	Nlrc4 Ipaf	1023	0.693868	0.335242	0.616956	0.227371	0.889155	0.327687	>0.05
F1M678	F1M678_RAT	Protein Ptprd (Fragment)	Ptprd	1871	0.387262	0.158212	1.64304	0.53935	4.24271	1.39273	<0.05
F1M6Q3	F1M6Q3_RAT	Protein Col4a2	Col4a2	1690	0.485174	0.217933	0.50622	0.22504	1.04338	0.463834	>0.05
F1M6T6	F1M6T6_RAT	Protein Ppp6r2 (Fragment)	Ppp6r2	882	0.289133	0.147262	0.30787	0.21894	1.0648	0.757228	>0.05
F1M787	F1M787_RAT	Catenin delta-2 (Fragment)	Ctnnd2	866	2.64475	0.418004	1.54113	0.353073	0.582713	0.133499	>0.05
F1M7N4	F1M7N4_RAT	Protein Clca5	Clca5	903	0.496373	0.267782	0.40656	0.222981	0.819061	0.44922	>0.05
F1M7W7	F1M7W7_RAT	NEDD8-activating enzyme E1 regulatory subunit	Nae1	534	0.486892	0.218515	0.10253	0.10253	0.210581	0.210581	>0.05
F1M7Y3	F1M7Y3_RAT	Protein Rap1gds1 (RAP1, GTP-GDP dissociation stimulator 1 (Predicted), isoform CRA_b)	Rap1gds1 Rap1gds1_predicted rCG_28604	478	9.10292	0.401403	9.72144	0.381368	1.06795	0.0418951	>0.05
F1M820	F1M820_RAT	Sorbin and SH3 domain-containing protein 1 (Fragment)	Sorbs1	1290	1.36094	0.256945	1.84543	0.208599	1.356	0.153276	>0.05
F1M836	F1M836_RAT	MAP/microtubule affinity-regulating kinase 3	Mark3	797	2.04352	0.365813	1.84108	0.202396	0.900933	0.0990427	>0.05
F1M882	F1M882_RAT	Secretory carrier-associated membrane protein 5 (Fragment)	Scamp5	234	5.76779	0.331733	5.10615	0.415698	0.885287	0.0720724	>0.05
F1M8G9	F1M8G9_RAT	Protein Ncam2 (Fragment)	Ncam2	819	2.26374	0.369825	2.24363	0.327734	0.991115	0.144775	>0.05
F1M8H6	F1M8H6_RAT	Phosphatidylinositol 4-phosphate 5-kinase type-1 gamma	Pip5k1c	688	4.49777	0.213543	3.47907	0.350387	0.77351	0.0779023	<0.05
F1M8K1	F1M8K1_RAT	Protein Pcdh1 (Fragment)	Pcdh1	1017	2.34868	0.263101	2.14492	0.415791	0.913245	0.177032	>0.05
F1M949	F1M949_RAT	Protein Ckap5	Ckap5	2032	0.88049	0.228182	0.610676	0.166251	0.693564	0.188816	>0.05
F1M978	F1M978_RAT	Inositol monophosphatase 1	Impa1	277	3.41893	0.488549	2.66181	0.229687	0.778551	0.0671809	>0.05
F1M9N9	F1M9N9_RAT	Protein Ank2 (Fragment)	Ank2	3903	34.0846	1.22759	30.7983	1.19228	0.903584	0.0349801	>0.05
F1M9T2	F1M9T2_RAT	Protein Parp8 (Fragment)	Parp8	804	0.18957	0.18957	0	0	0	0	>0.05
F1M9V7	F1M9V7_RAT	Protein Npepps	Npepps	920	12.7056	0.925446	13.009	0.64825	1.02388	0.0510209	>0.05
F1M9Y7	F1M9Y7_RAT	Protein Tcp11l1	Tcp11l1	509	0.779799	0.130143	0.407496	0.226209	0.522565	0.290087	>0.05
F1MA36	F1MA36_RAT	Spectrin beta 3 (Spectrin beta chain, non-erythrocytic 2)	Sptbn2 Spnb3 rCG_48072	2388	55.8517	1.08288	50.8147	1.38428	0.909815	0.024785	<0.05
F1MAF8	F1MAF8_RAT	Protein Atg2b	Atg2b	2075	0.19582	0.19582	0.10281	0.10281	0.525023	0.525023	>0.05
F1MAK3	F1MAK3_RAT	Protein Arhgap32	Arhgap32	2086	0.495517	0.221294	0.20683	0.20683	0.417402	0.417402	>0.05
F1MAP9	F1MAP9_RAT	E3 ubiquitin-protein ligase HUWE1	Huwe1	4181	0.294977	0.209625	0.20696	0.137973	0.701614	0.467743	>0.05
F2Z3Q8	F2Z3Q8_RAT	Importin subunit beta-1	Kpnb1	876	5.78944	0.583931	6.04514	0.459622	1.04417	0.0793897	>0.05
F7EPE0	F7EPE0_RAT	Sulfated glycoprotein 1	Psap	557	0.583768	0.215801	0.50293	0.30755	0.861524	0.526837	>0.05
F7EYB9	F7EYB9_RAT	Protein Omg (RCG34300)	Omg rCG_34300	443	3.51294	0.432838	4.60311	0.275575	1.31033	0.0784456	<0.05
F7EZQ4	F7EZQ4_RAT	Protein Fcgbpl1	Fcgbpl1	2537	0.19582	0.19582	0	0	0	0	>0.05
F8WFM2	F8WFM2_RAT	Beta-soluble NSF attachment protein	Napb	298	24.2429	0.549763	22.7066	0.54247	0.936629	0.0223765	>0.05
F8WG67	F8WG67_RAT	Acyl-CoA thioesterase 7, isoform CRA_a (Cytosolic acyl coenzyme A thioester hydrolase)	Acot7 rCG_30783	372	3.52091	0.461173	3.37834	0.311809	0.959508	0.0885593	>0.05
G3V624	G3V624_RAT	Coronin	Coro1c RGD1564490_predicted rCG_21130	474	1.56689	0.264138	0.919626	0.185011	0.586912	0.118075	>0.05
G3V644	G3V644_RAT	NADH dehydrogenase (Ubiquinone) flavoprotein 3-like, isoform CRA_a (NADH dehydrogenase [ubiquinone] flavoprotein 3, mitochondrial)	Ndufv3 Ndufv3l rCG_60955	458	1.46702	0.267028	1.53358	0.312148	1.04537	0.212777	>0.05
G3V672	G3V672_RAT	Protein Nrip1 (RGD1563102 (Predicted))	Nrip1 RGD1563102_predicted rCG_58711	1162	0	0	0.30617	0.218622	N/A	N/A	>0.05
G3V6A8	G3V6A8_RAT	Golgi autoantigen, golgin subfamily b, macrogolgin 1, isoform CRA_c (Protein Golgb1)	Golgb1 rCG_52814	3187	0	0	0.40939	0.225976	N/A	N/A	>0.05
G3V6D3	G3V6D3_RAT	ATP synthase subunit beta (EC 3.6.3.14)	Atp5b rCG_42467	529	289.359	3.59873	315.755	2.95212	1.09122	0.0102023	<0.05
G3V6H9	G3V6H9_RAT	Nucleosome assembly protein 1-like 1 (RCG48740, isoform CRA_a)	Nap1l1 rCG_48740	391	1.86174	0.272857	1.74301	0.223317	0.936225	0.119951	>0.05
G3V6L4	G3V6L4_RAT	Kinesin-like protein (Fragment)	Kif5c	914	2.63158	0.430536	3.47199	0.43301	1.31936	0.164544	>0.05
G3V6L8	G3V6L8_RAT	RCG61894, isoform CRA_a (Striatin)	Strn rCG_61894	780	6.17336	0.372422	3.47556	0.267888	0.562993	0.0433942	<0.05
G3V6P2	G3V6P2_RAT	Dihydrolipoamide S-succinyltransferase (E2 component of 2-oxo-glutarate complex), isoform CRA_a (Dihydrolipoyllysine-residue succinyltransferase component of 2-oxoglutarate dehydrogenase complex, mitochondrial)	Dlst rCG_21026	454	6.16548	0.443419	5.93533	0.26059	0.962671	0.042266	>0.05
G3V6P7	G3V6P7_RAT	Myosin, heavy polypeptide 9, non-muscle (Protein LOC100911597)	LOC100911597 Myh9 rCG_59912	1960	6.38745	0.580269	6.85485	0.460054	1.07317	0.0720247	>0.05
G3V6P8	G3V6P8_RAT	Guanine nucleotide-binding protein subunit gamma	Gng12 rCG_55333	72	3.22919	0.210291	2.86862	0.209213	0.88834	0.0647881	>0.05
G3V6Q3	G3V6Q3_RAT	Protein Wdr13	Wdr13	392	1.36502	0.154832	1.53403	0.170029	1.12382	0.124562	>0.05
G3V6Q6	G3V6Q6_RAT	Guanine nucleotide binding protein, alpha 11 (Guanine nucleotide-binding protein subunit alpha-11)	Gna11 rCG_29464	359	4.59205	0.286131	5.10492	0.418486	1.11169	0.0911328	>0.05
G3V6S2	G3V6S2_RAT	Aconitate hydratase (Aconitase) (EC 4.2.1.3)	Aco1 rCG_55067	889	1.6615	0.148217	1.23156	0.254509	0.741232	0.15318	>0.05
G3V6U3	G3V6U3_RAT	Asparagine-linked glycosylation 2 homolog (Yeast, alpha-1,3-mannosyltransferase), isoform CRA_a (Protein Alg2)	Alg2 rCG_60347	415	2.17286	0.417235	1.94018	0.321874	0.892914	0.148134	>0.05
G3V6W6	G3V6W6_RAT	Protein Psmc6 (RCG61291)	Psmc6 LOC100365869 rCG_61291	403	0.877615	0.0977255	0.924046	0.185303	1.05291	0.211144	>0.05
G3V6Y6	G3V6Y6_RAT	Alpha-1,4 glucan phosphorylase (EC 2.4.1.1)	Pygb rCG_37246	843	22.9841	0.49025	27.1106	0.846967	1.17954	0.0368501	<0.05
G3V728	G3V728_RAT	4-nitrophenylphosphatase domain and non-neuronal SNAP25-like protein homolog 1 (C. elegans), isoform CRA_b (Protein Nipsnap1)	Nipsnap1 rCG_35740	284	3.6103	0.468213	2.04484	0.399185	0.566391	0.110568	<0.05
G3V741	G3V741_RAT	Phosphate carrier protein, mitochondrial (Solute carrier family 25 (Mitochondrial carrier; adenine nucleotide translocator), member 3, isoform CRA_c)	Slc25a3 rCG_49152	356	22.1698	0.934105	22.0944	0.354597	0.996599	0.0159946	>0.05
G3V746	G3V746_RAT	Glutamate receptor ionotropic, NMDA 2B (Glutamate receptor, ionotropic, N-methyl D-aspartate 2B, isoform CRA_a)	Grin2b rCG_29810	1482	0.494217	0.22012	0.718276	0.221058	1.45336	0.447289	>0.05
G3V786	G3V786_RAT	Protein Akr1b8 (RCG27994)	Akr1b8 rCG_27994	316	0.387262	0.158212	1.02253	0.214386	2.6404	0.553593	<0.05
G3V7I8	G3V7I8_RAT	RCG57812, isoform CRA_b (STE20-like serine/threonine-protein kinase)	Slk rCG_57812	1203	1.76278	0.198059	2.56021	0.274076	1.45237	0.155479	<0.05
G3V7J0	G3V7J0_RAT	Aldehyde dehydrogenase family 6, subfamily A1, isoform CRA_b (Methylmalonate-semialdehyde dehydrogenase [acylating], mitochondrial)	Aldh6a1 rCG_20746	535	3.73205	0.301797	3.27771	0.335178	0.87826	0.0898106	>0.05
G3V7P1	STX12_RAT	Syntaxin-12 (Syntaxin-13)	Stx12 Stx13	274	3.33435	0.269888	3.48083	0.23055	1.04393	0.0691439	>0.05
G3V7T8	G3V7T8_RAT	Discs, large (Drosophila) homolog-associated protein 3, isoform CRA_b (Disks large-associated protein 3)	Dlgap3 rCG_31018	977	0.398926	0.220883	1.42754	0.308181	3.57846	0.772528	<0.05
G3V7U2	G3V7U2_RAT	Microtubule-associated protein 1 A, isoform CRA_c (Microtubule-associated protein 1A)	Map1a Mtap1a rCG_27021	2776	79.3506	1.50769	79.167	1.88386	0.997686	0.023741	>0.05
G3V7U4	G3V7U4_RAT	Lamin-B1 (RCG46767, isoform CRA_c)	Lmnb1 rCG_46767	587	1.25997	0.384716	1.23506	0.33864	0.980226	0.268768	>0.05
G3V7X5	G3V7X5_RAT	SPARC-like 1 (Mast9, hevin), isoform CRA_a (SPARC-like protein 1)	Sparcl1 rCG_37980	634	0.78253	0.130625	0.61098	0.223894	0.780775	0.286115	>0.05
G3V7Y3	G3V7Y3_RAT	ATP synthase subunit delta, mitochondrial (ATP synthase, H+ transporting, mitochondrial F1 complex, delta subunit, isoform CRA_b)	Atp5d rCG_29527	168	9.49428	0.469357	8.593	0.378497	0.905071	0.0398658	>0.05
G3V803	G3V803_RAT	Cadherin-2 (RCG49564, isoform CRA_a)	Cdh2 rCG_49564	906	1.76645	0.249208	1.23143	0.397782	0.697121	0.225187	>0.05
G3V826	G3V826_RAT	Transketolase (EC 2.2.1.1)	Tkt rCG_42377	655	13.5192	1.05961	14.108	0.44459	1.04355	0.0328859	>0.05
G3V864	G3V864_RAT	Lipid phosphate phosphatase-related protein type 4 (RCG28720)	Lppr4 rCG_28720	766	2.33784	0.292683	1.73788	0.267701	0.74337	0.114508	>0.05
G3V874	G3V874_RAT	Erythrocyte protein band 4.1-like 3, isoform CRA_b (Protein Epb41l3)	Epb41l3 Epb4.1l3 rCG_35644	963	16.7549	0.749764	16.3709	0.630537	0.977081	0.037633	>0.05
G3V881	G3V881_RAT	Leucine rich repeat neuronal 6A, isoform CRA_a (Protein Lingo1)	Lingo1 Lrrn6a rCG_57832	620	0.5797	0.21404	0.609646	0.223591	1.05166	0.385701	>0.05
G3V8A5	G3V8A5_RAT	Vacuolar protein sorting-associated protein 35	Vps35 Vps35_mapped rCG_44281	796	6.56298	0.234008	6.5427	0.427711	0.99691	0.0651703	>0.05
G3V8B6	G3V8B6_RAT	26S proteasome non-ATPase regulatory subunit 1 (Proteasome (Prosome, macropain) 26S subunit, non-ATPase, 1, isoform CRA_a)	Psmd1 rCG_23832	953	1.36518	0.260099	1.12184	0.238654	0.821747	0.174815	>0.05
G3V8E8	G3V8E8_RAT	Guanine nucleotide-binding protein G(olf) subunit alpha	Gnal	381	12.6123	0.527876	12.4865	0.381051	0.990024	0.0302127	>0.05
G3V8G4	G3V8G4_RAT	Brevican core protein (Brevican, isoform CRA_a)	Bcan LOC100910284 rCG_62833	883	11.1472	0.478723	10.6459	0.430804	0.955032	0.0386468	>0.05
G3V8H5	G3V8H5_RAT	Inhibitor of kappaB kinase beta, isoform CRA_b (Inhibitor of nuclear factor kappa-B kinase subunit beta)	Ikbkb rCG_43029	757	0	0	0.19971	0.19971	N/A	N/A	>0.05
G3V8K2	G3V8K2_RAT	Guanine nucleotide-binding protein subunit gamma	Gng3 rCG_47413	75	3.028	0.222361	3.68599	0.232278	1.2173	0.0767099	>0.05
G3V8L3	G3V8L3_RAT	Lamin A, isoform CRA_b (Prelamin-A/C)	Lmna rCG_62695	665	3.12313	0.311119	2.5582	0.274204	0.819114	0.0877977	>0.05
G3V8Q2	G3V8Q2_RAT	Alpha-internexin (Internexin, alpha)	Ina Inexa rCG_57469	506	66.0166	1.12241	68.464	1.1247	1.03707	0.0170367	>0.05
G3V8R2	G3V8R2_RAT	Neurocan core protein (Protein LOC102550316) (RCG38677)	Ncan LOC100911345 LOC102550316 rCG_38677	1263	1.86069	0.231716	1.63876	0.272164	0.880727	0.14627	>0.05
G3V8T4	G3V8T4_RAT	DNA damage-binding protein 1 (Damage-specific DNA binding protein 1)	Ddb1 rCG_47402	1140	0.481587	0.217189	0.41179	0.168117	0.855069	0.34909	>0.05
G3V8V3	G3V8V3_RAT	Alpha-1,4 glucan phosphorylase (EC 2.4.1.1)	Pygm rCG_48197	842	7.82602	0.462123	6.64517	0.592167	0.849112	0.0756665	>0.05
G3V8W2	G3V8W2_RAT	Phosphatidate cytidylyltransferase (EC 2.7.7.41)	Cds2 rCG_26193	444	2.2438	0.32624	1.94909	0.327738	0.868657	0.146064	>0.05
G3V914	G3V914_RAT	Glutamate receptor 2	Gria2	883	3.32196	0.291563	5.00645	0.409823	1.50708	0.123368	<0.05
G3V918	G3V918_RAT	Phosphoribosylglycinamide formyltransferase, isoform CRA_a (Protein Gart)	Gart rCG_58778	1010	1.07607	0.178038	0.615306	0.167524	0.571809	0.155681	>0.05
G3V928	G3V928_RAT	Protein Lrp1 (RCG59548)	Lrp1 rCG_59548	4545	0.682099	0.255274	0.40958	0.167238	0.60047	0.245181	>0.05
G3V936	G3V936_RAT	Citrate synthase	Cs rCG_42519	466	18.8597	0.714629	17.4862	0.737839	0.927173	0.0391225	>0.05
G3V940	G3V940_RAT	Coronin	Coro1b rCG_48535	484	2.83057	0.21707	3.27193	0.130122	1.15593	0.0459703	>0.05
G3V949	G3V949_RAT	CAP-Gly domain-containing linker protein 2 (Cytoplasmic linker 2)	Clip2 Cyln2 rCG_21414	1047	1.46747	0.335635	1.32678	0.263472	0.904126	0.179542	>0.05
G3V957	G3V957_RAT	Protein LOC100359960	LOC100359960	263	1.37566	0.301138	0.921056	0.239459	0.669538	0.174068	>0.05
G3V963	G3V963_RAT	RCG47487, isoform CRA_b (Transmembrane protein 132A)	Tmem132a rCG_47487	1021	0.686512	0.209241	0.10202	0.10202	0.148606	0.148606	<0.05
G3V964	G3V964_RAT	Neurotrimin (RCG22798)	Ntm rCG_22798	344	5.29911	0.443955	4.70357	0.270143	0.887615	0.050979	>0.05
G3V984	G3V984_RAT	Protein bassoon (RCG25274, isoform CRA_a)	Bsn rCG_25274	3933	30.8258	1.21694	31.6124	1.24751	1.02552	0.0404698	>0.05
G3V9G1	G3V9G1_RAT	Adenylate cyclase 5 (Adenylate cyclase type 5)	Adcy5 rCG_52683	1262	6.06863	0.384828	5.53116	0.520885	0.911435	0.0858323	>0.05
G3V9K0	G3V9K0_RAT	Cysteinyl-tRNA synthetase (Predicted), isoform CRA_b (Protein Cars)	Cars Cars_predicted rCG_47503	748	0.485219	0.2179	0	0	0	0	<0.05
G3V9N8	G3V9N8_RAT	AP complex subunit beta	Ap1b1 rCG_35796	942	20.1233	1.17928	20.1336	1.07713	1.00051	0.0535266	>0.05
G3V9Q3	G3V9Q3_RAT	Heterogeneous nuclear ribonucleoprotein H (Heterogeneous nuclear ribonucleoprotein H1, isoform CRA_b)	Hnrnph1 Hnrph1 rCG_32746	449	7.82987	0.336955	6.13934	0.343616	0.784092	0.0438852	<0.05
G3V9T7	G3V9T7_RAT	ATPase Asna1 (EC 3.6.-.-) (Arsenical pump-driving ATPase) (Arsenite-stimulated ATPase)	Asna1 rCG_51373	348	1.76307	0.239013	2.35452	0.433515	1.33547	0.245887	>0.05
G3V9Y1	G3V9Y1_RAT	Myosin, heavy polypeptide 10, non-muscle, isoform CRA_b (Myosin-10)	Myh10 rCG_34638	1976	36.2964	0.75794	35.8307	1.25186	0.98717	0.03449	>0.05
G3V9Z6	G3V9Z6_RAT	Septin 8 (Predicted) (Septin-8)	Sept8 Sept8_predicted rCG_33165	429	9.08245	0.374774	6.94834	0.745274	0.765029	0.0820565	<0.05
H1UBM5	H1UBM5_RAT	Copine 6 protein	Cpne6	552	1.85973	0.227233	1.93864	0.281819	1.04243	0.151538	>0.05
H9KVF8	H9KVF8_RAT	NADH-ubiquinone oxidoreductase chain 1 (EC 1.6.5.3) (Fragment)	ND1	318	0.880963	0.17589	0.819996	0.255561	0.930795	0.290093	>0.05
I6L9G6	I6L9G6_RAT	Protein Tardbp (RCG31562, isoform CRA_c) (Tardbp protein)	Tardbp rCG_31562	285	0.675336	0.25022	0.306816	0.156254	0.454316	0.231373	>0.05
I7EFB0	I7EFB0_RAT	Myelin basic protein transcript variant N (Fragment)	Mbp	209	149.813	4.15615	140.409	5.69973	0.937228	0.0380456	>0.05
M0R544	M0R544_RAT	Glucosidase, alpha, acid, isoform CRA_a (Lysosomal alpha-glucosidase)	Gaa rCG_33228	953	0.983701	0.149146	1.22925	0.138655	1.24961	0.140952	>0.05
M0R5A9	M0R5A9_RAT	Protein Dennd5b (Fragment)	Dennd5b	918	0.390924	0.216493	0.40813	0.227141	1.04401	0.581035	>0.05
M0R5C6	M0R5C6_RAT	Protein Iqsec1	Iqsec1 LOC686590	1099	1.27424	0.152335	1.54037	0.280733	1.20885	0.220314	>0.05
M0R5N3	M0R5N3_RAT	Uncharacterized protein (Fragment)	0	250	4.70007	0.292663	4.19563	0.361427	0.892674	0.0768982	>0.05
M0R5N4	M0R5N4_RAT	Prefoldin subunit 4	Pfdn4 LOC100366237 rCG_32197	134	0.391304	0.216387	0	0	0	0	>0.05
M0R618	M0R618_RAT	Protein Etl4 (Fragment)	Etl4	1981	2.14303	0.367618	0.407476	0.22695	0.19014	0.105902	<0.05
M0R660	M0R660_RAT	Glyceraldehyde-3-phosphate dehydrogenase (EC 1.2.1.12)	RGD1565368	333	190.575	6.05054	215.095	4.38239	1.12866	0.0229956	<0.05
M0R6H3	M0R6H3_RAT	Protein LOC100912526	Rgag1 LOC100912526	1368	0.098097	0.098097	0.410156	0.315233	4.18113	3.21348	>0.05
M0R776	M0R776_RAT	Protein Mrps36 (RCG44686, isoform CRA_a)	Mrps36 rCG_44686	103	1.5715	0.217769	1.22442	0.201605	0.779138	0.128288	>0.05
M0R781	M0R781_RAT	Protein Dpp9	Dpp9	862	0	0	0.40866	0.226554	N/A	N/A	>0.05
M0R7F3	M0R7F3_RAT	Protein Wasf3	Wasf3	501	0.878301	0.176782	0.924236	0.241153	1.0523	0.274567	>0.05
M0R7U1	M0R7U1_RAT	Protein Ak5 (RCG28422)	Ak5 rCG_28422	562	1.07592	0.0971372	0.611866	0.166567	0.568692	0.154814	<0.05
M0R7V3	M0R7V3_RAT	Protein Apoo	Apoo	198	2.64846	0.219326	2.35525	0.271751	0.88929	0.102607	>0.05
M0R7W2	M0R7W2_RAT	Protein Arhgef10l	Arhgef10l	1202	0.098097	0.098097	0.20687	0.20687	2.10883	2.10883	>0.05
M0R809	M0R809_RAT	Guanine nucleotide-binding protein subunit gamma	Gng4 rCG_19927	75	0.9724	0.14147	0.714816	0.156055	0.735105	0.160485	>0.05
M0R8T2	M0R8T2_RAT	10-formyltetrahydrofolate dehydrogenase (EC 1.5.1.6)	Aldh1l1	902	0.576045	0.290699	0.40931	0.167115	0.710552	0.290108	>0.05
M0R8U1	M0R8U1_RAT	Protein Dnah5	Dnah5	3470	2.05434	0.268869	1.53532	0.171244	0.747355	0.0833571	>0.05
M0R9D5	M0R9D5_RAT	Protein Ahnak	Ahnak	5363	0.199707	0.133147	0.40657	0.223621	2.03583	1.11974	>0.05
M0R9I8	M0R9I8_RAT	40S ribosomal protein S12	LOC100364427	132	1.4684	0.164133	1.83789	0.201924	1.25163	0.137513	>0.05
M0R9L0	M0R9L0_RAT	Protein Naca	Naca	2163	2.44109	0.155333	3.07029	0.216365	1.25775	0.0886344	<0.05
M0RA24	M0RA24_RAT	Protein LOC100362391	LOC100362391	100	1.96008	0.15339	1.22346	0.254762	0.624189	0.129975	<0.05
M0RAD5	M0RAD5_RAT	ATP-dependent Clp protease proteolytic subunit (EC 3.4.21.92)	Clpp	272	1.28133	0.216223	0.50718	0.225288	0.395824	0.175824	<0.05
M0RAJ5	M0RAJ5_RAT	Protein Prr14l	Prr14l	1967	0.39425	0.219349	0	0	0	0	>0.05
M0RAP5	M0RAP5_RAT	Protein Sbf1	Sbf1	1893	1.37503	0.165533	1.43281	0.312794	1.04202	0.227482	>0.05
M0RB63	M0RB63_RAT	Protein LOC684509 (RCG63041)	LOC684509 rCG_63041	84	1.96129	0.257541	1.43072	0.272926	0.72948	0.139157	>0.05
M0RBH6	M0RBH6_RAT	Uncharacterized protein (Fragment)	0	320	74.2426	2.26031	75.8398	2.27968	1.02151	0.0307058	>0.05
M0RBJ0	M0RBJ0_RAT	Guanine nucleotide-binding protein subunit gamma (Fragment)	Gng2	58	3.23174	0.157878	3.1719	0.18421	0.981484	0.0570003	>0.05
M0RBL5	M0RBL5_RAT	Uncharacterized protein (Fragment)	0	528	7.32848	0.31201	6.45272	0.387998	0.880499	0.0529439	>0.05
M0RBL8	M0RBL8_RAT	Protein Tceal6	Tceal6 LOC679974 Tceal3	199	4.5015	0.302465	4.49699	0.212945	0.998998	0.0473053	>0.05
M0RC57	M0RC57_RAT	Protein unc-45 homolog A	Smap1 LOC684800	440	3.12173	0.346168	1.53179	0.347671	0.490686	0.111371	<0.05
M0RC58	M0RC58_RAT	Protein Dpy19l2	Dpy19l2 Dyp19l2	773	0	0	0.40896	0.224362	N/A	N/A	>0.05
M0RC65	M0RC65_RAT	Cofilin 2, muscle (Predicted), isoform CRA_b (Protein Cfl2)	Cfl2 Cfl2_predicted rCG_62072	166	13.202	0.490653	13.3968	0.333699	1.01476	0.0252764	>0.05
M0RD40	M0RD40_RAT	Protein Sik3	Sik3 LOC684112	1366	0.587275	0.213425	0	0	0	0	<0.05
M0RDI5	M0RDI5_RAT	Protein Mcu (Similar to CG18769-PB, isoform B, isoform CRA_b)	Mcu LOC294560 rCG_22037	350	0.200039	0.133359	1.01739	0.262599	5.08594	1.31274	<0.05
M9MMM9	M9MMM9_RAT	Microtubule-actin cross-linking factor 1	Macf1	5430	2.44644	0.164363	1.84575	0.339114	0.754462	0.138615	>0.05
O08557	DDAH1_RAT	N(G),N(G)-dimethylarginine dimethylaminohydrolase 1 (DDAH-1) (Dimethylarginine dimethylaminohydrolase 1) (EC 3.5.3.18) (DDAHI) (Dimethylargininase-1)	Ddah1 Ddah	285	7.04506	0.410674	6.34664	0.434504	0.900864	0.061675	>0.05
O08618	KPRB_RAT	Phosphoribosyl pyrophosphate synthase-associated protein 2 (PRPP synthase-associated protein 2) (41 kDa phosphoribosypyrophosphate synthetase-associated protein) (PAP41)	Prpsap2	369	1.07423	0.173524	0.816506	0.205008	0.760086	0.190842	>0.05
O08629	TIF1B_RAT	Transcription intermediary factor 1-beta (TIF1-beta) (E3 SUMO-protein ligase TRIM28) (EC 6.3.2.-) (KRAB-associated protein 1) (Nuclear corepressor KAP-1) (Tripartite motif-containing protein 28)	Trim28 Kap1 Tif1b	835	0.197883	0.131955	0.41194	0.228182	2.08174	1.15312	>0.05
O08651	SERA_RAT	D-3-phosphoglycerate dehydrogenase (3-PGDH) (EC 1.1.1.95)	Phgdh	533	7.04073	0.406889	7.36166	0.654176	1.04558	0.092913	>0.05
O08679	MARK2_RAT	Serine/threonine-protein kinase MARK2 (EC 2.7.11.1) (EC 2.7.11.26) (ELKL motif kinase 1) (EMK-1) (MAP/microtubule affinity-regulating kinase 2)	Mark2	722	3.51547	0.247796	3.68465	0.313405	1.04812	0.0891501	>0.05
O08838	AMPH_RAT	Amphiphysin	Amph Amph1	683	15.4599	0.33345	15.029	0.896568	0.972128	0.0579931	>0.05
O08839	BIN1_RAT	Myc box-dependent-interacting protein 1 (Amphiphysin II) (Amphiphysin-like protein) (Bridging integrator 1)	Bin1 Amph2 Amphl	588	12.1148	0.50526	10.2276	0.480482	0.844226	0.0396607	<0.05
O08875	DCLK1_RAT	Serine/threonine-protein kinase DCLK1 (EC 2.7.11.1) (Calcium/calmodulin-dependent protein kinase type I-like CPG16) (Doublecortin-like and CAM kinase-like 1) (Doublecortin-like kinase 1)	Dclk1 Cpg16 Dcamkl1	433	2.81754	0.424669	2.55796	0.516582	0.907871	0.183345	>0.05
O35049	NSMA2_RAT	Sphingomyelin phosphodiesterase 3 (EC 3.1.4.12) (Confluent 3Y1 cell-associated protein 1) (Neutral sphingomyelinase 2) (nSMase-2) (nSMase2) (Neutral sphingomyelinase II)	Smpd3 Cca1	655	0.58675	0.159765	0.71076	0.26211	1.21135	0.446715	>0.05
O35077	GPDA_RAT	Glycerol-3-phosphate dehydrogenase [NAD(+)], cytoplasmic (GPD-C) (GPDH-C) (EC 1.1.1.8)	Gpd1	349	2.34433	0.153619	2.96576	0.316728	1.26508	0.135104	>0.05
O35095	NCDN_RAT	Neurochondrin (Neurite outgrowth-related protein from the rat brain) (Norbin)	Ncdn	729	14.2625	0.560984	13.3024	0.439823	0.932684	0.0308377	>0.05
O35112	CD166_RAT	CD166 antigen (Activated leukocyte cell adhesion molecule) (HB2) (KG-CAM) (Protein MEMD) (SB-10 antigen) (CD antigen CD166)	Alcam	583	1.27718	0.292811	1.7367	0.378245	1.35979	0.296155	>0.05
O35142	COPB2_RAT	Coatomer subunit beta' (Beta'-coat protein) (Beta'-COP) (p102)	Copb2	905	0.486725	0.218442	0.510166	0.170094	1.04816	0.349465	>0.05
O35179	SH3G2_RAT	Endophilin-A1 (Endophilin-1) (SH3 domain protein 2A) (SH3 domain-containing GRB2-like protein 2) (SH3p4)	Sh3gl2 Sh3d2a Sh3p4	352	14.3891	0.560176	15.5368	0.499676	1.07976	0.034726	>0.05
O35180	SH3G3_RAT	Endophilin-A3 (Endophilin-3) (SH3 domain protein 2C) (SH3 domain-containing GRB2-like protein 3) (SH3p13)	Sh3gl3 Sh3d2c1 Sh3p13	347	0.978652	0.286618	0.71981	0.308558	0.735512	0.315289	>0.05
O35244	PRDX6_RAT	Peroxiredoxin-6 (EC 1.11.1.15) (1-Cys peroxiredoxin) (1-Cys PRX) (Acidic calcium-independent phospholipase A2) (aiPLA2) (EC 3.1.1.-) (Antioxidant protein 2) (Non-selenium glutathione peroxidase) (NSGPx) (EC 1.11.1.9) (Thiol-specific antioxidant protein)	Prdx6 Aipla2 Aop2 Tsa	224	11.154	0.573965	10.5374	0.502047	0.944716	0.0450104	>0.05
O35264	PA1B2_RAT	Platelet-activating factor acetylhydrolase IB subunit beta (EC 3.1.1.47) (PAF acetylhydrolase 30 kDa subunit) (PAF-AH 30 kDa subunit) (PAF-AH subunit beta) (PAFAH subunit beta) (Platelet-activating factor acetylhydrolase alpha 2 subunit) (PAF-AH alpha 2)	Pafah1b2 Pafahb	229	0.390574	0.159545	1.94494	0.184764	4.9797	0.473059	<0.05
O35274	NEB2_RAT	Neurabin-2 (Neurabin-II) (Neural tissue-specific F-actin-binding protein II) (PP1bp134) (Protein phosphatase 1 regulatory subunit 9B) (Spinophilin) (p130)	Ppp1r9b	817	5.07989	0.267799	4.49262	0.331599	0.884393	0.0652769	>0.05
O35303	DNM1L_RAT	Dynamin-1-like protein (EC 3.6.5.5) (Dynamin-like protein)	Dnm1l Dlp1	755	18.2619	0.987794	15.7475	0.994769	0.862314	0.0544723	>0.05
O35314	SCG1_RAT	Secretogranin-1 (Chromogranin-B) (CgB) (Glucagonoma peptide) (Secretogranin-I) (SgI) [Cleaved into: CCB peptide short form; CCB peptide long form]	Chgb	675	2.34183	0.21037	1.63593	0.225796	0.698569	0.0964189	<0.05
O35458	VIAAT_RAT	Vesicular inhibitory amino acid transporter (GABA and glycine transporter) (Solute carrier family 32 member 1) (Vesicular GABA transporter) (rGVAT)	Slc32a1 Vgat Viaat	525	2.24447	0.201237	2.34717	0.211279	1.04576	0.0941334	>0.05
O35509	RB11B_RAT	Ras-related protein Rab-11B	Rab11b	218	5.1834	0.255164	6.64959	0.411001	1.28286	0.0792918	<0.05
O35550	RABE1_RAT	Rab GTPase-binding effector protein 1 (Rabaptin-5) (Rabaptin-5alpha)	Rabep1 Rabpt5 Rabpt5a	862	0.979436	0.249573	0.20394	0.135977	0.208222	0.138832	<0.05
O35567	PUR9_RAT	Bifunctional purine biosynthesis protein PURH [Includes: Phosphoribosylaminoimidazolecarboxamide formyltransferase (EC 2.1.2.3) (5-aminoimidazole-4-carboxamide ribonucleotide formyltransferase) (AICAR transformylase); IMP cyclohydrolase (EC 3.5.4.10) (ATIC) (IMP synthase) (Inosinicase)]	Atic Purh	592	4.91581	0.620014	3.27112	0.363372	0.665428	0.0739191	<0.05
O35764	NPTXR_RAT	Neuronal pentraxin receptor	Nptxr Npr	494	0.394477	0.216841	0.51359	0.229778	1.30195	0.582489	>0.05
O35796	C1QBP_RAT	Complement component 1 Q subcomponent-binding protein, mitochondrial (GC1q-R protein) (Glycoprotein gC1qBP) (C1qBP)	C1qbp Gc1qbp	279	8.13386	0.363779	7.66705	0.449734	0.942609	0.0552916	>0.05
O35814	STIP1_RAT	Stress-induced-phosphoprotein 1 (STI1) (Hsc70/Hsp90-organizing protein) (Hop)	Stip1 Hop	543	11.2433	0.581435	9.60976	0.566822	0.854708	0.0504141	>0.05
O35828	CORO7_RAT	Coronin-7 (Crn7) (70 kDa WD repeat tumor rejection antigen)	Coro7	922	0.487847	0.261996	0.815356	0.202376	1.67134	0.414835	>0.05
O35867	NEB1_RAT	Neurabin-1 (Neurabin-I) (Neural tissue-specific F-actin-binding protein I) (PP1bp175) (Protein phosphatase 1 regulatory subunit 9A) (p180)	Ppp1r9a	1095	6.26636	0.560242	5.30463	0.481093	0.846525	0.0767739	>0.05
O35964	SH3G1_RAT	Endophilin-A2 (Endophilin-2) (SH3 domain protein 2B) (SH3 domain-containing GRB2-like protein 1) (SH3p8)	Sh3gl1 Sh3p8	368	6.94894	0.407593	6.84525	0.554466	0.985078	0.0797915	>0.05
O35987	NSF1C_RAT	NSFL1 cofactor p47 (XY body-associated protein XY40) (p97 cofactor p47)	Nsfl1c	370	7.9161	0.411054	7.98075	0.334619	1.00817	0.0422707	>0.05
O54975	XPP1_RAT	Xaa-Pro aminopeptidase 1 (EC 3.4.11.9) (Aminoacylproline aminopeptidase) (Cytosolic aminopeptidase P) (Soluble aminopeptidase P) (sAmp) (X-Pro aminopeptidase 1) (X-prolyl aminopeptidase 1, soluble) [Cleaved into: Xaa-Pro aminopeptidase 1, N-terminally processed]	Xpnpep1 App	623	2.25258	0.260047	1.53981	0.317418	0.683576	0.140913	>0.05
O55096	DPP3_RAT	Dipeptidyl peptidase 3 (EC 3.4.14.4) (Dipeptidyl aminopeptidase III) (Dipeptidyl arylamidase III) (Dipeptidyl peptidase III) (DPP III) (Enkephalinase B)	Dpp3	738	2.82896	0.295073	2.1529	0.322806	0.761022	0.114108	>0.05
O55173	PDPK1_RAT	3-phosphoinositide-dependent protein kinase 1 (EC 2.7.11.1) (Protein kinase B kinase) (PkB kinase)	Pdpk1 Pdk1	559	1.27493	0.153222	0.819986	0.205389	0.643161	0.161098	>0.05
O70196	PPCE_RAT	Prolyl endopeptidase (PE) (EC 3.4.21.26) (Post-proline cleaving enzyme) (rPop)	Prep	710	0.783662	0.285874	0	0	0	0	<0.05
O70257	STX7_RAT	Syntaxin-7	Stx7	261	1.85628	0.173614	2.1475	0.183155	1.15689	0.0986682	>0.05
O70351	HCD2_RAT	3-hydroxyacyl-CoA dehydrogenase type-2 (EC 1.1.1.35) (17-beta-hydroxysteroid dehydrogenase 10) (17-beta-HSD 10) (EC 1.1.1.51) (3-hydroxy-2-methylbutyryl-CoA dehydrogenase) (EC 1.1.1.178) (3-hydroxyacyl-CoA dehydrogenase type II) (Endoplasmic reticulum-associated amyloid beta-peptide-binding protein) (Mitochondrial ribonuclease P protein 2) (Mitochondrial RNase P protein 2) (Type II HADH)	Hsd17b10 Erab Hadh2	261	7.04773	0.300054	5.53244	0.584987	0.784996	0.0830036	<0.05
O70419	O70419_RAT	Cortactin isoform C	0	471	1.47952	0.311058	3.58208	0.232287	2.4211	0.157002	<0.05
O70441	SYN3_RAT	Synapsin-3 (Synapsin III)	Syn3	579	1.2772	0.360121	2.45729	0.170389	1.92396	0.133408	<0.05
O70511	ANK3_RAT	Ankyrin-3 (ANK-3) (Ankyrin-G)	Ank3	2622	7.00165	0.753454	5.53522	0.452314	0.790559	0.0646011	>0.05
O70593	SGTA_RAT	Small glutamine-rich tetratricopeptide repeat-containing protein alpha (Alpha-SGT) (Small glutamine-rich protein with tetratricopeptide repeats 1)	Sgta Sgt Sgt1 Stg	314	0.675143	0.203067	1.02715	0.155887	1.52138	0.230894	>0.05
O88339	EPN1_RAT	Epsin-1 (EPS-15-interacting protein 1)	Epn1	575	3.99811	0.284722	3.47563	0.307539	0.869318	0.076921	>0.05
O88377	PI42B_RAT	Phosphatidylinositol 5-phosphate 4-kinase type-2 beta (EC 2.7.1.149) (1-phosphatidylinositol 5-phosphate 4-kinase 2-beta) (Diphosphoinositide kinase 2-beta) (Phosphatidylinositol 5-phosphate 4-kinase type II beta) (PI(5)P 4-kinase type II beta) (PIP4KII-beta) (Phosphatidylinositol-phosphate kinase IIgamma) (PIPKIIgamma) (PtdIns(5)P-4-kinase isoform 2-beta)	Pip4k2b Pip5k2b	416	3.03309	0.271461	3.68584	0.410411	1.21521	0.135311	>0.05
O88483	PDP1_RAT	[Pyruvate dehydrogenase [acetyl-transferring]]-phosphatase 1, mitochondrial (PDP 1) (EC 3.1.3.43) (Protein phosphatase 2C) (Pyruvate dehydrogenase phosphatase catalytic subunit 1) (PDPC 1)	Pdp1 Ppm2c	538	0.872871	0.224692	0.71526	0.26613	0.819434	0.30489	>0.05
O88588	PACS1_RAT	Phosphofurin acidic cluster sorting protein 1 (PACS-1)	Pacs1	961	3.7048	0.469649	1.84234	0.369382	0.497284	0.0997035	<0.05
O88600	HSP74_RAT	Heat shock 70 kDa protein 4 (Ischemia responsive 94 kDa protein)	Hspa4 Irp94	840	22.2147	0.729916	22.9474	1.14655	1.03298	0.0516124	>0.05
O88637	PCY2_RAT	Ethanolamine-phosphate cytidylyltransferase (EC 2.7.7.14) (CTP:phosphoethanolamine cytidylyltransferase) (Phosphorylethanolamine transferase)	Pcyt2	404	0.488267	0.218617	0.407256	0.166297	0.834085	0.340586	>0.05
O88767	PARK7_RAT	Protein deglycase DJ-1 (EC 3.1.2.-) (EC 3.5.1.-) (Contraception-associated protein 1) (Protein CAP1) (Fertility protein SP22) (Parkinson disease protein 7 homolog)	Park7 Cap1	189	13.5953	0.568166	14.8323	0.551694	1.09099	0.0405798	>0.05
O88831	KKCC2_RAT	Calcium/calmodulin-dependent protein kinase kinase 2 (CaM-KK 2) (CaM-kinase kinase 2) (CaMKK 2) (EC 2.7.11.17) (Calcium/calmodulin-dependent protein kinase kinase beta) (CaM-KK beta) (CaM-kinase kinase beta) (CaMKK beta)	Camkk2	587	1.36985	0.29921	0.613146	0.166929	0.447601	0.12186	<0.05
O88989	MDHC_RAT	Malate dehydrogenase, cytoplasmic (EC 1.1.1.37) (Cytosolic malate dehydrogenase)	Mdh1 Mdh	334	41.2361	1.13562	44.1906	0.875321	1.07165	0.0212271	>0.05
O89049	TRXR1_RAT	Thioredoxin reductase 1, cytoplasmic (TR) (EC 1.8.1.9) (NADPH-dependent thioredoxin reductase) (Thioredoxin reductase TR1)	Txnrd1 Trxr1	499	0.381313	0.290051	0.51098	0.22688	1.34005	0.594997	>0.05
P00507	AATM_RAT	Aspartate aminotransferase, mitochondrial (mAspAT) (EC 2.6.1.1) (EC 2.6.1.7) (Fatty acid-binding protein) (FABP-1) (Glutamate oxaloacetate transaminase 2) (Kynurenine aminotransferase 4) (Kynurenine aminotransferase IV) (Kynurenine--oxoglutarate transaminase 4) (Kynurenine--oxoglutarate transaminase IV) (Plasma membrane-associated fatty acid-binding protein) (FABPpm) (Transaminase A)	Got2 Maat	430	46.0781	0.883503	48.0673	1.05547	1.04317	0.0229061	>0.05
P00787	CATB_RAT	Cathepsin B (EC 3.4.22.1) (Cathepsin B1) (RSG-2) [Cleaved into: Cathepsin B light chain; Cathepsin B heavy chain]	Ctsb	339	2.83632	0.572025	3.06953	0.305677	1.08222	0.107772	>0.05
P01041	CYTB_RAT	Cystatin-B (Cystatin-beta) (Liver thiol proteinase inhibitor) (Stefin-B)	Cstb Cst6	98	0.680588	0.14865	1.53989	0.175709	2.26258	0.258172	<0.05
P01830	THY1_RAT	Thy-1 membrane glycoprotein (Thy-1 antigen) (CD antigen CD90)	Thy1 Thy-1	161	10.8561	0.504615	12.0665	0.552508	1.1115	0.0508939	>0.05
P01946	HBA_RAT	Hemoglobin subunit alpha-1/2 (Alpha-1/2-globin) (Hemoglobin alpha-1/2 chain)	Hba1 Hba-a1	142	110.088	1.61061	106.112	3.32242	0.963885	0.0301797	>0.05
P02091	HBB1_RAT	Hemoglobin subunit beta-1 (Beta-1-globin) (Hemoglobin beta chain, major-form) (Hemoglobin beta-1 chain)	Hbb	147	130.792	2.26999	140.955	2.86818	1.0777	0.0219294	<0.05
P02262	H2A1_RAT	Histone H2A type 1	0	130	15.6634	0.524746	17.1054	0.877525	1.09206	0.0560239	>0.05
P02401	RLA2_RAT	60S acidic ribosomal protein P2	Rplp2 Rp2	115	7.73104	0.318067	7.26217	0.41396	0.939352	0.0535452	>0.05
P02625	PRVA_RAT	Parvalbumin alpha	Pvalb Pva	110	0.876895	0.225541	0.817256	0.204762	0.931988	0.233508	>0.05
P02650	APOE_RAT	Apolipoprotein E (Apo-E)	Apoe	312	7.92573	0.480804	8.28823	0.391899	1.04574	0.0494465	>0.05
P02770	ALBU_RAT	Serum albumin	Alb	608	36.865	0.979983	39.3946	0.521725	1.06862	0.0141523	<0.05
P03994	HPLN1_RAT	Hyaluronan and proteoglycan link protein 1 (Cartilage-linking protein 1) (Cartilage-link protein) (Proteoglycan link protein)	Hapln1 Crtl1	354	2.84113	0.231489	2.24874	0.252897	0.791495	0.0890127	>0.05
P04094	PENK_RAT	Proenkephalin-A [Cleaved into: Synenkephalin; Met-enkephalin (Opioid growth factor) (OGF); PENK(114-133); PENK(143-185); Met-enkephalin-Arg-Gly-Leu; Leu-enkephalin; PENK(239-260); Met-enkephalin-Arg-Phe]	Penk Penk-rs Penk1	269	3.52855	0.336989	3.26787	0.288725	0.926123	0.0818254	>0.05
P04177	TY3H_RAT	Tyrosine 3-monooxygenase (EC 1.14.16.2) (Tyrosine 3-hydroxylase) (TH)	Th	498	12.7255	0.508933	10.2211	0.506094	0.8032	0.0397701	<0.05
P04182	OAT_RAT	Ornithine aminotransferase, mitochondrial (EC 2.6.1.13) (Ornithine--oxo-acid aminotransferase)	Oat	439	2.64032	0.293538	2.0366	0.294664	0.771346	0.111601	>0.05
P04218	OX2G_RAT	OX-2 membrane glycoprotein (MRC OX-2 antigen) (CD antigen CD200)	Cd200 Mox2	278	1.46665	0.262431	0.40359	0.222708	0.275179	0.151848	<0.05
P04631	S100B_RAT	Protein S100-B (S-100 protein beta chain) (S-100 protein subunit beta) (S100 calcium-binding protein B)	S100b	92	20.3725	0.741218	19.8495	0.602419	0.974328	0.0295702	>0.05
P04636	MDHM_RAT	Malate dehydrogenase, mitochondrial (EC 1.1.1.37)	Mdh2 Mor1	338	82.4306	1.65577	81.184	2.2186	0.984877	0.0269148	>0.05
P04642	LDHA_RAT	L-lactate dehydrogenase A chain (LDH-A) (EC 1.1.1.27) (LDH muscle subunit) (LDH-M)	Ldha Ldh-1 Ldh1	332	37.0725	0.850255	37.8497	0.39211	1.02096	0.0105768	>0.05
P04692	TPM1_RAT	Tropomyosin alpha-1 chain (Alpha-tropomyosin) (Tropomyosin-1)	Tpm1 Alpha-tm Tpma	284	12.2586	0.814727	10.5228	0.806215	0.858395	0.0657671	>0.05
P04762	CATA_RAT	Catalase (EC 1.11.1.6)	Cat Cas1	527	2.32779	0.313973	1.94876	0.240708	0.837172	0.103406	>0.05
P04764	ENOA_RAT	Alpha-enolase (EC 4.2.1.11) (2-phospho-D-glycerate hydro-lyase) (Enolase 1) (Non-neural enolase) (NNE)	Eno1 Eno-1	434	160.328	3.99924	165.94	2.51735	1.035	0.0157013	>0.05
P04775	SCN2A_RAT	Sodium channel protein type 2 subunit alpha (Sodium channel protein brain II subunit alpha) (Sodium channel protein type II subunit alpha) (Voltage-gated sodium channel subunit alpha Nav1.2)	Scn2a Scn2a1	2005	1.07663	0.098633	1.23114	0.141467	1.14351	0.131398	>0.05
P04785	PDIA1_RAT	Protein disulfide-isomerase (PDI) (EC 5.3.4.1) (Cellular thyroid hormone-binding protein) (Prolyl 4-hydroxylase subunit beta)	P4hb Pdia1	509	2.73945	0.243948	2.14806	0.358815	0.784121	0.130981	>0.05
P04797	G3P_RAT	Glyceraldehyde-3-phosphate dehydrogenase (GAPDH) (EC 1.2.1.12) (38 kDa BFA-dependent ADP-ribosylation substrate) (BARS-38) (Peptidyl-cysteine S-nitrosylase GAPDH) (EC 2.6.99.-)	Gapdh Gapd	333	256.236	7.82403	289.537	4.77043	1.12996	0.0186173	<0.05
P04897	GNAI2_RAT	Guanine nucleotide-binding protein G(i) subunit alpha-2 (Adenylate cyclase-inhibiting G alpha protein)	Gnai2 Gnai-2	355	29.2485	0.865258	26.6135	0.739701	0.90991	0.0252902	<0.05
P04904	GSTA3_RAT	Glutathione S-transferase alpha-3 (EC 2.5.1.18) (GST 2-2) (GST A3-3) (GST AA) (Glutathione S-transferase Yc-1) (GST Yc1)	Gsta3 Gstyc1	221	0.294098	0.209303	0.41103	0.16783	1.3976	0.570661	>0.05
P04905	GSTM1_RAT	Glutathione S-transferase Mu 1 (EC 2.5.1.18) (GST 3-3) (GSTM1-1) (Glutathione S-transferase Yb-1) (GST Yb1)	Gstm1	218	10.2705	0.524596	7.88444	0.384128	0.767677	0.037401	<0.05
P04906	GSTP1_RAT	Glutathione S-transferase P (EC 2.5.1.18) (Chain 7) (GST 7-7) (GST class-pi)	Gstp1	210	13.9068	0.542611	12.5812	0.483203	0.90468	0.0347458	>0.05
P05065	ALDOA_RAT	Fructose-bisphosphate aldolase A (EC 4.1.2.13) (Muscle-type aldolase)	Aldoa	364	102.662	2.03492	92.7826	2.00361	0.903769	0.0195166	<0.05
P05197	EF2_RAT	Elongation factor 2 (EF-2)	Eef2	858	15.8498	0.51284	14.0228	0.630945	0.88473	0.0398078	<0.05
P05370	G6PD_RAT	Glucose-6-phosphate 1-dehydrogenase (G6PD) (EC 1.1.1.49)	G6pdx G6pd	515	0.590505	0.299985	0.40567	0.222704	0.686988	0.377142	>0.05
P05371	CLUS_RAT	Clusterin (Dimeric acid glycoprotein) (DAG) (Sulfated glycoprotein 2) (SGP-2) (Testosterone repressed prostate message 2) (TRPM-2) [Cleaved into: Clusterin beta chain; Clusterin alpha chain]	Clu	447	1.76549	0.321324	2.24914	0.202311	1.27394	0.114591	>0.05
P05708	HXK1_RAT	Hexokinase-1 (EC 2.7.1.1) (Brain form hexokinase) (Hexokinase type I) (HK I)	Hk1	918	56.8919	1.39394	52.4659	0.595824	0.922203	0.0104729	<0.05
P05712	RAB2A_RAT	Ras-related protein Rab-2A	Rab2a Rab2	212	6.15325	0.300626	5.21513	0.273736	0.847541	0.0444865	<0.05
P06685	AT1A1_RAT	Sodium/potassium-transporting ATPase subunit alpha-1 (Na(+)/K(+) ATPase alpha-1 subunit) (EC 3.6.3.9) (Sodium pump subunit alpha-1)	Atp1a1	1023	148.343	1.89487	164.907	2.59075	1.11166	0.0174646	<0.05
P06686	AT1A2_RAT	Sodium/potassium-transporting ATPase subunit alpha-2 (Na(+)/K(+) ATPase alpha-2 subunit) (EC 3.6.3.9) (Na(+)/K(+) ATPase alpha(+) subunit) (Sodium pump subunit alpha-2)	Atp1a2	1020	143.718	1.85702	160.698	2.00386	1.11815	0.013943	<0.05
P06687	AT1A3_RAT	Sodium/potassium-transporting ATPase subunit alpha-3 (Na(+)/K(+) ATPase alpha-3 subunit) (EC 3.6.3.9) (Na(+)/K(+) ATPase alpha(III) subunit) (Sodium pump subunit alpha-3)	Atp1a3	1013	258.331	2.82823	294.011	3.11161	1.13812	0.012045	<0.05
P06761	GRP78_RAT	78 kDa glucose-regulated protein (GRP-78) (Heat shock 70 kDa protein 5) (Immunoglobulin heavy chain-binding protein) (BiP) (Steroidogenesis-activator polypeptide)	Hspa5 Grp78	654	29.5413	0.729797	32.4101	1.03407	1.09711	0.0350043	<0.05
P07153	RPN1_RAT	Dolichyl-diphosphooligosaccharide--protein glycosyltransferase subunit 1 (EC 2.4.99.18) (Dolichyl-diphosphooligosaccharide--protein glycosyltransferase 67 kDa subunit) (Ribophorin I) (RPN-I) (Ribophorin-1)	Rpn1	605	0.393072	0.219172	0.81883	0.297739	2.08316	0.757466	>0.05
P07171	CALB1_RAT	Calbindin (Calbindin D28) (D-28K) (Spot 35 protein) (Vitamin D-dependent calcium-binding protein, avian-type)	Calb1	261	10.7912	0.764338	10.033	0.472677	0.929745	0.0438022	>0.05
P07323	ENOG_RAT	Gamma-enolase (EC 4.2.1.11) (2-phospho-D-glycerate hydro-lyase) (Enolase 2) (Neural enolase) (Neuron-specific enolase) (NSE)	Eno2 Eno-2	434	165.243	3.66214	158.694	5.18323	0.960367	0.0313673	>0.05
P07335	KCRB_RAT	Creatine kinase B-type (EC 2.7.3.2) (B-CK) (Creatine kinase B chain)	Ckb Ckbb	381	354.181	4.23427	394.082	3.72926	1.11266	0.0105293	<0.05
P07340	AT1B1_RAT	Sodium/potassium-transporting ATPase subunit beta-1 (Sodium/potassium-dependent ATPase subunit beta-1)	Atp1b1	304	30.1566	0.773716	31.4264	0.66808	1.04211	0.0221537	>0.05
P07483	FABPH_RAT	Fatty acid-binding protein, heart (Fatty acid-binding protein 3) (Heart-type fatty acid-binding protein) (H-FABP)	Fabp3	133	3.71714	0.354089	3.57077	0.40413	0.960623	0.108721	>0.05
P07722	MAG_RAT	Myelin-associated glycoprotein (Brain neuron cytoplasmic protein 3) (Sialic acid-binding Ig-like lectin 4a) (Siglec-4a)	Mag	626	8.5105	0.464674	8.17191	0.682397	0.960215	0.080183	>0.05
P07825	SYPH_RAT	Synaptophysin (Major synaptic vesicle protein p38)	Syp	307	18.8739	0.596814	20.1569	1.11005	1.06798	0.0588139	>0.05
P07895	SODM_RAT	Superoxide dismutase [Mn], mitochondrial (EC 1.15.1.1)	Sod2	222	5.28379	0.420942	4.08711	0.20306	0.773519	0.0384307	<0.05
P07936	NEUM_RAT	Neuromodulin (Axonal membrane protein GAP-43) (Growth-associated protein 43) (Protein F1)	Gap43	226	23.8443	0.613359	22.1907	0.568518	0.93065	0.0238429	>0.05
P07943	ALDR_RAT	Aldose reductase (AR) (EC 1.1.1.21) (Aldehyde reductase)	Akr1b1 Akr1b4 Aldr1	316	6.45975	0.371664	4.71037	0.539743	0.729188	0.0835548	<0.05
P08009	GSTM4_RAT	Glutathione S-transferase Yb-3 (EC 2.5.1.18) (Chain 4) (GST Yb3) (GST class-mu 3)	Gstm3	218	10.4482	0.352782	10.4362	0.544457	0.998854	0.0521101	>0.05
P08050	CXA1_RAT	Gap junction alpha-1 protein (Connexin-43) (Cx43) (Gap junction 43 kDa heart protein)	Gja1 Cxn-43	382	5.38036	0.447205	6.96083	0.551812	1.29375	0.10256	<0.05
P08081	CLCA_RAT	Clathrin light chain A (Lca)	Clta	248	1.76992	0.600532	0.40359	0.222708	0.228027	0.125829	<0.05
P08082	CLCB_RAT	Clathrin light chain B (Lcb)	Cltb	229	8.22334	0.459583	9.81137	0.535729	1.19311	0.0651473	<0.05
P08413	KCC2B_RAT	Calcium/calmodulin-dependent protein kinase type II subunit beta (CaM kinase II subunit beta) (CaMK-II subunit beta) (EC 2.7.11.17)	Camk2b	542	33.6579	0.839429	31.9047	0.77404	0.947911	0.0229973	>0.05
P08461	ODP2_RAT	Dihydrolipoyllysine-residue acetyltransferase component of pyruvate dehydrogenase complex, mitochondrial (EC 2.3.1.12) (70 kDa mitochondrial autoantigen of primary biliary cirrhosis) (PBC) (Dihydrolipoamide acetyltransferase component of pyruvate dehydrogenase complex) (Pyruvate dehydrogenase complex component E2) (PDC-E2) (PDCE2)	Dlat	632	16.7988	0.572919	16.954	1.18313	1.00924	0.0704296	>0.05
P08753	GNAI3_RAT	Guanine nucleotide-binding protein G(k) subunit alpha (G(i) alpha-3)	Gnai3 Gnai-3	354	18.6707	0.522976	17.1938	0.546592	0.920897	0.0292754	>0.05
P09117	ALDOC_RAT	Fructose-bisphosphate aldolase C (EC 4.1.2.13) (Brain-type aldolase)	Aldoc	363	41.2064	0.962838	42.3368	1.062	1.02743	0.0257727	>0.05
P09215	KPCD_RAT	Protein kinase C delta type (EC 2.7.11.13) (nPKC-delta) [Cleaved into: Protein kinase C delta type regulatory subunit; Protein kinase C delta type catalytic subunit (Sphingosine-dependent protein kinase-1) (SDK1)]	Prkcd Pkcd	673	1.75685	0.193198	1.63602	0.347591	0.931226	0.197849	>0.05
P09495	TPM4_RAT	Tropomyosin alpha-4 chain (Tropomyosin-4) (TM-4)	Tpm4	248	6.95813	0.305974	4.9068	0.46747	0.705189	0.0671833	<0.05
P09527	RAB7A_RAT	Ras-related protein Rab-7a (Ras-related protein BRL-RAS) (Ras-related protein p23)	Rab7a Rab7	207	5.6731	0.242062	3.88691	0.298566	0.685147	0.0526284	<0.05
P09606	GLNA_RAT	Glutamine synthetase (GS) (EC 6.3.1.2) (Glutamate decarboxylase) (EC 4.1.1.15) (Glutamate--ammonia ligase)	Glul Glns	373	17.4057	0.809178	18.2166	0.637057	1.04659	0.0366005	>0.05
P09895	RL5_RAT	60S ribosomal protein L5	Rpl5	297	0.976799	0.209192	0.81933	0.254771	0.838791	0.260822	>0.05
P09951	SYN1_RAT	Synapsin-1 (Synapsin I)	Syn1	704	84.2972	1.56745	85.738	2.17643	1.01709	0.0258185	>0.05
P0C0S7	H2AZ_RAT	Histone H2A.Z (H2A/z)	H2afz H2az	128	9.69811	0.377853	8.9137	0.533842	0.919117	0.055046	>0.05
P0C5X8	TTYH1_RAT	Protein tweety homolog 1	Ttyh1	450	2.53609	0.464469	2.35157	0.21738	0.927242	0.0857146	>0.05
P0C643	GRP2_RAT	RAS guanyl-releasing protein 2 (Calcium and DAG-regulated guanine nucleotide exchange factor I) (CalDAG-GEFI)	Rasgrp2	608	1.17446	0.282299	1.42674	0.345442	1.21481	0.294129	>0.05
P0C6S7	ANS1B_RAT	Ankyrin repeat and sterile alpha motif domain-containing protein 1B (Amyloid-beta protein intracellular domain-associated protein 1) (AIDA-1) (E2A-PBX1-associated protein) (EB-1)	Anks1b	1260	2.44169	0.392815	1.73888	0.219422	0.712163	0.0898647	>0.05
P0DJJ3	SGIP1_RAT	SH3-containing GRB2-like protein 3-interacting protein 1 (Endophilin-3-interacting protein)	Sgip1	827	4.5098	0.429784	4.70474	0.310711	1.04323	0.0688969	>0.05
P10111	PPIA_RAT	Peptidyl-prolyl cis-trans isomerase A (PPIase A) (EC 5.2.1.8) (Cyclophilin A) (Cyclosporin A-binding protein) (Rotamase A) (p1B15) (p31) [Cleaved into: Peptidyl-prolyl cis-trans isomerase A, N-terminally processed]	Ppia	164	51.5582	1.10509	49.4137	1.40327	0.958406	0.0272172	>0.05
P10536	RAB1B_RAT	Ras-related protein Rab-1B	Rab1b	201	11.7546	0.383939	12.4749	0.552012	1.06128	0.0469613	>0.05
P10687	PLCB1_RAT	1-phosphatidylinositol 4,5-bisphosphate phosphodiesterase beta-1 (EC 3.1.4.11) (PLC-154) (Phosphoinositide phospholipase C-beta-1) (Phospholipase C-I) (PLC-I) (Phospholipase C-beta-1) (PLC-beta-1)	Plcb1	1216	16.145	0.693079	17.3937	0.510409	1.07734	0.0316141	>0.05
P10760	SAHH_RAT	Adenosylhomocysteinase (AdoHcyase) (EC 3.3.1.1) (S-adenosyl-L-homocysteine hydrolase)	Ahcy	432	5.66942	0.344313	5.22255	0.520586	0.921179	0.0918236	>0.05
P10818	CX6A1_RAT	Cytochrome c oxidase subunit 6A1, mitochondrial (Cytochrome c oxidase polypeptide VIa-liver)	Cox6a1 Cox6al	111	6.76177	0.494463	5.82276	0.51411	0.86113	0.0760319	>0.05
P10824	GNAI1_RAT	Guanine nucleotide-binding protein G(i) subunit alpha-1 (Adenylate cyclase-inhibiting G alpha protein)	Gnai1 Gnai-1	354	25.0432	0.413187	23.9394	0.435285	0.955924	0.0173814	>0.05
P10860	DHE3_RAT	Glutamate dehydrogenase 1, mitochondrial (GDH 1) (EC 1.4.1.3) (Memory-related gene 2 protein) (MRG-2)	Glud1 Glud	558	34.2281	0.900961	34.2934	0.771752	1.00191	0.0225473	>0.05
P10888	COX41_RAT	Cytochrome c oxidase subunit 4 isoform 1, mitochondrial (Cytochrome c oxidase polypeptide IV) (Cytochrome c oxidase subunit IV isoform 1) (COX IV-1)	Cox4i1 Cox4 Cox4a	169	11.7539	0.453601	13.0978	0.570131	1.11433	0.0485056	>0.05
P11030	ACBP_RAT	Acyl-CoA-binding protein (ACBP) (Diazepam-binding inhibitor) (DBI) (Endozepine) (EP) [Cleaved into: Triakontatetraneuropeptide (TTN); Octadecaneuropeptide (ODN)]	Dbi	87	6.45527	0.211652	5.72527	0.216579	0.886914	0.0335508	<0.05
P11167	GTR1_RAT	Solute carrier family 2, facilitated glucose transporter member 1 (Glucose transporter type 1, erythrocyte/brain) (GLUT-1)	Slc2a1 Glut-1 Glut1	492	0.679953	0.208211	1.53301	0.313466	2.25458	0.461012	<0.05
P11232	THIO_RAT	Thioredoxin (Trx)	Txn Txn1	105	0.198736	0.132493	2.13929	0.349012	10.7645	1.75616	<0.05
P11240	COX5A_RAT	Cytochrome c oxidase subunit 5A, mitochondrial (Cytochrome c oxidase polypeptide Va)	Cox5a	146	19.2394	0.973791	20.5706	0.954799	1.06919	0.0496273	>0.05
P11275	KCC2A_RAT	Calcium/calmodulin-dependent protein kinase type II subunit alpha (CaM kinase II subunit alpha) (CaMK-II subunit alpha) (EC 2.7.11.17)	Camk2a	478	53.7868	0.562773	53.5034	1.29717	0.994731	0.0241169	>0.05
P11348	DHPR_RAT	Dihydropteridine reductase (EC 1.5.1.34) (HDHPR) (Quinoid dihydropteridine reductase)	Qdpr Dhpr	241	11.6178	0.468844	12.2733	0.597269	1.05642	0.0514099	>0.05
P11442	CLH1_RAT	Clathrin heavy chain 1	Cltc	1675	152.604	2.32764	158.834	3.19787	1.04082	0.0209553	>0.05
P11506	AT2B2_RAT	Plasma membrane calcium-transporting ATPase 2 (PMCA2) (EC 3.6.3.8) (Plasma membrane calcium ATPase isoform 2) (Plasma membrane calcium pump isoform 2)	Atp2b2	1243	28.6426	0.55849	26.7153	0.730942	0.932712	0.0255194	>0.05
P11517	HBB2_RAT	Hemoglobin subunit beta-2 (Beta-2-globin) (Hemoglobin beta chain, minor-form) (Hemoglobin beta-2 chain)	0	147	62.8367	1.91988	66.4001	1.5467	1.05671	0.0246146	>0.05
P11598	PDIA3_RAT	Protein disulfide-isomerase A3 (EC 5.3.4.1) (58 kDa glucose-regulated protein) (58 kDa microsomal protein) (p58) (Disulfide isomerase ER-60) (Endoplasmic reticulum resident protein 57) (ER protein 57) (ERp57) (Endoplasmic reticulum resident protein 60) (ER protein 60) (ERp60) (HIP-70) (Q-2)	Pdia3 Erp60 Grp58	505	13.2955	0.49938	14.5194	0.812762	1.09205	0.0611306	>0.05
P11730	KCC2G_RAT	Calcium/calmodulin-dependent protein kinase type II subunit gamma (CaM kinase II subunit gamma) (CaMK-II subunit gamma) (EC 2.7.11.17)	Camk2g	527	17.6119	0.540229	17.483	0.626756	0.992681	0.0355871	>0.05
P11915	NLTP_RAT	Non-specific lipid-transfer protein (NSL-TP) (EC 2.3.1.176) (Propanoyl-CoA C-acyltransferase) (SCP-chi) (SCPX) (Sterol carrier protein 2) (SCP-2) (Sterol carrier protein X) (SCP-X)	Scp2 Scp-2	547	1.08564	0.232332	0.713066	0.21605	0.656814	0.199006	>0.05
P11951	CX6C2_RAT	Cytochrome c oxidase subunit 6C-2 (Cytochrome c oxidase polypeptide VIc-2)	Cox6c2 Cox6c	76	4.99443	0.380911	3.68566	0.228958	0.737954	0.0458427	<0.05
P11980	KPYM_RAT	Pyruvate kinase PKM (EC 2.7.1.40) (Pyruvate kinase muscle isozyme)	Pkm Pkm2 Pykm	531	122.351	1.14644	125.829	2.57904	1.02843	0.021079	>0.05
P12001	RL18_RAT	60S ribosomal protein L18	Rpl18	188	0.673339	0.289574	0.715966	0.265932	1.06331	0.394945	>0.05
P12007	IVD_RAT	Isovaleryl-CoA dehydrogenase, mitochondrial (IVD) (EC 1.3.8.4)	Ivd	424	1.3621	0.294223	1.02403	0.264784	0.751803	0.194394	>0.05
P12075	COX5B_RAT	Cytochrome c oxidase subunit 5B, mitochondrial (Cytochrome c oxidase polypeptide Vb) (Cytochrome c oxidase subunit VIA*)	Cox5b	129	6.47386	0.583635	4.49795	0.308146	0.694786	0.0475985	<0.05
P12368	KAP2_RAT	cAMP-dependent protein kinase type II-alpha regulatory subunit	Prkar2a	401	5.96617	0.266654	5.52464	0.482473	0.925994	0.0808681	>0.05
P12369	KAP3_RAT	cAMP-dependent protein kinase type II-beta regulatory subunit	Prkar2b	416	25.2382	0.86304	24.8728	0.738276	0.985522	0.0292523	>0.05
P12785	FAS_RAT	Fatty acid synthase (EC 2.3.1.85) [Includes: [Acyl-carrier-protein] S-acetyltransferase (EC 2.3.1.38); [Acyl-carrier-protein] S-malonyltransferase (EC 2.3.1.39); 3-oxoacyl-[acyl-carrier-protein] synthase (EC 2.3.1.41); 3-oxoacyl-[acyl-carrier-protein] reductase (EC 1.1.1.100); 3-hydroxyacyl-[acyl-carrier-protein] dehydratase (EC 4.2.1.59); Enoyl-[acyl-carrier-protein] reductase (EC 1.3.1.39); Ole…	Fasn	2505	4.8786	0.462341	5.11332	0.370593	1.04811	0.0759629	>0.05
P12839	NFM_RAT	Neurofilament medium polypeptide (NF-M) (160 kDa neurofilament protein) (Neurofilament 3) (Neurofilament triplet M protein)	Nefm Nef3 Nfm	846	38.1936	1.13083	31.9187	0.69289	0.835708	0.0181415	<0.05
P13084	NPM_RAT	Nucleophosmin (NPM) (Nucleolar phosphoprotein B23) (Nucleolar protein NO38) (Numatrin)	Npm1	292	1.08145	0.230364	1.53113	0.167105	1.41581	0.154519	>0.05
P13086	SUCA_RAT	Succinyl-CoA ligase [ADP/GDP-forming] subunit alpha, mitochondrial (EC 6.2.1.4) (EC 6.2.1.5) (Succinyl-CoA synthetase subunit alpha) (SCS-alpha)	Suclg1	346	5.18377	0.285472	5.01299	0.286255	0.967055	0.0552214	>0.05
P13221	AATC_RAT	Aspartate aminotransferase, cytoplasmic (cAspAT) (EC 2.6.1.1) (EC 2.6.1.3) (Cysteine aminotransferase, cytoplasmic) (Cysteine transaminase, cytoplasmic) (cCAT) (Glutamate oxaloacetate transaminase 1) (Transaminase A)	Got1	413	18.0069	0.823215	20.0422	0.925017	1.11303	0.0513702	>0.05
P13233	CN37_RAT	2',3'-cyclic-nucleotide 3'-phosphodiesterase (CNP) (CNPase) (EC 3.1.4.37)	Cnp Cnp1	420	102.739	1.90192	112.835	1.12595	1.09827	0.0109593	<0.05
P13234	KCC4_RAT	Calcium/calmodulin-dependent protein kinase type IV (CaMK IV) (EC 2.7.11.17) (CaM kinase-GR) (Calspermin)	Camk4	474	3.52354	0.219817	2.14678	0.280579	0.609268	0.0796299	<0.05
P13264	GLSK_RAT	Glutaminase kidney isoform, mitochondrial (GLS) (EC 3.5.1.2) (K-glutaminase) (L-glutamine amidohydrolase) [Cleaved into: Glutaminase kidney isoform 68 kDa chain; Glutaminase kidney isoform 65 kDa chain]	Gls	674	18.0791	0.649009	16.0675	0.583514	0.888733	0.0322756	<0.05
P13383	NUCL_RAT	Nucleolin (Protein C23)	Ncl Nuc	713	3.22991	0.329653	1.63941	0.316292	0.507571	0.097926	<0.05
P13471	RS14_RAT	40S ribosomal protein S14	Rps14	151	0.679758	0.148448	0.41194	0.228182	0.60601	0.335682	>0.05
P13596	NCAM1_RAT	Neural cell adhesion molecule 1 (N-CAM-1) (NCAM-1) (CD antigen CD56)	Ncam1 Ncam	858	34.8262	1.04989	36.4257	1.03026	1.04593	0.029583	>0.05
P13668	STMN1_RAT	Stathmin (Leukemia-associated phosphoprotein p18) (Metablastin) (Oncoprotein 18) (Op18) (Phosphoprotein p19) (pp19) (Pr22 protein) (Prosolin) (pp17)	Stmn1 Lap18	149	4.79566	0.376703	6.84421	0.466254	1.42717	0.0972241	<0.05
P13803	ETFA_RAT	Electron transfer flavoprotein subunit alpha, mitochondrial (Alpha-ETF)	Etfa	333	3.62741	0.305964	3.99383	0.246671	1.10101	0.0680019	>0.05
P14046	A1I3_RAT	Alpha-1-inhibitor 3 (Alpha-1-inhibitor 3 variant II) (Alpha-1-inhibitor III)	A1i3 Mug1	1477	4.12592	0.573313	4.60818	0.416212	1.11689	0.100877	>0.05
P14173	DDC_RAT	Aromatic-L-amino-acid decarboxylase (AADC) (EC 4.1.1.28) (DOPA decarboxylase) (DDC)	Ddc	480	2.04795	0.261476	2.14687	0.0969059	1.0483	0.0473186	>0.05
P14604	ECHM_RAT	Enoyl-CoA hydratase, mitochondrial (EC 4.2.1.17) (Enoyl-CoA hydratase 1) (Short-chain enoyl-CoA hydratase) (SCEH)	Echs1	290	6.43985	0.386651	6.14106	0.271421	0.953603	0.042147	>0.05
P14668	ANXA5_RAT	Annexin A5 (Anchorin CII) (Annexin V) (Annexin-5) (Calphobindin I) (CBP-I) (Endonexin II) (Lipocortin V) (Placental anticoagulant protein 4) (PP4) (Placental anticoagulant protein I) (PAP-I) (Thromboplastin inhibitor) (Vascular anticoagulant-alpha) (VAC-alpha)	Anxa5 Anx5	319	4.90742	0.452018	4.59457	0.399027	0.93625	0.0813109	>0.05
P14669	ANXA3_RAT	Annexin A3 (35-alpha calcimedin) (Annexin III) (Annexin-3) (Lipocortin III) (Placental anticoagulant protein III) (PAP-III)	Anxa3 Anx3	324	2.15186	0.280437	1.5323	0.408747	0.712082	0.189951	>0.05
P14841	CYTC_RAT	Cystatin-C (Cystatin-3)	Cst3	140	3.22745	0.147014	3.27352	0.13526	1.01427	0.0419091	>0.05
P14882	PCCA_RAT	Propionyl-CoA carboxylase alpha chain, mitochondrial (PCCase subunit alpha) (EC 6.4.1.3) (Propanoyl-CoA:carbon dioxide ligase subunit alpha)	Pcca	737	1.07302	0.17484	0.31247	0.22269	0.291207	0.207536	<0.05
P15650	ACADL_RAT	Long-chain specific acyl-CoA dehydrogenase, mitochondrial (LCAD) (EC 1.3.8.8)	Acadl	430	0.294518	0.150077	0.404376	0.222995	1.37301	0.757153	>0.05
P15791	KCC2D_RAT	Calcium/calmodulin-dependent protein kinase type II subunit delta (CaM kinase II subunit delta) (CaMK-II subunit delta) (EC 2.7.11.17)	Camk2d	533	13.3102	0.81162	11.6679	0.333181	0.876613	0.025032	>0.05
P15865	H14_RAT	Histone H1.4 (H1d)	Hist1h1e H1f4	219	7.64629	0.546164	6.85045	0.335764	0.895918	0.043912	>0.05
P15999	ATPA_RAT	ATP synthase subunit alpha, mitochondrial	Atp5a1	553	172.047	2.51552	185.873	4.10931	1.08036	0.0238848	<0.05
P16086	SPTN1_RAT	Spectrin alpha chain, non-erythrocytic 1 (Alpha-II spectrin) (Fodrin alpha chain)	Sptan1 Spna2 Spta2	2472	217.683	3.27443	213.558	2.8511	0.98105	0.0130975	>0.05
P16446	PIPNA_RAT	Phosphatidylinositol transfer protein alpha isoform (PI-TP-alpha) (PtdIns transfer protein alpha) (PtdInsTP alpha)	Pitpna Pitpn	271	4.00722	0.36599	3.79603	0.411992	0.947297	0.102813	>0.05
P16617	PGK1_RAT	Phosphoglycerate kinase 1 (EC 2.7.2.3)	Pgk1 Pgk-1	417	57.1165	0.987761	54.5616	1.54729	0.955269	0.02709	>0.05
P16638	ACLY_RAT	ATP-citrate synthase (EC 2.3.3.8) (ATP-citrate (pro-S-)-lyase) (Citrate cleavage enzyme)	Acly	1100	6.44599	0.51366	4.58835	0.605553	0.711815	0.0939426	<0.05
P17105	IP3KA_RAT	Inositol-trisphosphate 3-kinase A (EC 2.7.1.127) (Inositol 1,4,5-trisphosphate 3-kinase A) (IP3 3-kinase A) (IP3K A) (InsP 3-kinase A)	Itpka	459	0.879594	0.31256	1.43403	0.225139	1.63033	0.255958	>0.05
P17764	THIL_RAT	Acetyl-CoA acetyltransferase, mitochondrial (EC 2.3.1.9) (Acetoacetyl-CoA thiolase)	Acat1	424	13.7814	0.478549	13.7	0.648836	0.994093	0.0470806	>0.05
P18088	DCE1_RAT	Glutamate decarboxylase 1 (EC 4.1.1.15) (67 kDa glutamic acid decarboxylase) (GAD-67) (Glutamate decarboxylase 67 kDa isoform)	Gad1 Gad67	593	0.687361	0.208336	1.22616	0.204417	1.78386	0.297394	>0.05
P18265	GSK3A_RAT	Glycogen synthase kinase-3 alpha (GSK-3 alpha) (EC 2.7.11.26) (Factor A) (FA) (Serine/threonine-protein kinase GSK3A) (EC 2.7.11.1)	Gsk3a	483	2.83332	0.365394	3.16468	0.352466	1.11695	0.1244	>0.05
P18266	GSK3B_RAT	Glycogen synthase kinase-3 beta (GSK-3 beta) (EC 2.7.11.26) (Factor A) (FA) (Serine/threonine-protein kinase GSK3B) (EC 2.7.11.1)	Gsk3b	420	1.56866	0.267119	2.14899	0.320211	1.36995	0.20413	>0.05
P18297	SPRE_RAT	Sepiapterin reductase (SPR) (EC 1.1.1.153)	Spr	262	0.873265	0.224204	1.43048	0.165076	1.63808	0.189033	>0.05
P18418	CALR_RAT	Calreticulin (CALBP) (CRP55) (Calcium-binding protein 3) (CABP3) (Calregulin) (Endoplasmic reticulum resident protein 60) (ERp60) (HACBP)	Calr	416	11.4604	0.458671	14.2135	0.635135	1.24022	0.0554198	<0.05
P18484	AP2A2_RAT	AP-2 complex subunit alpha-2 (100 kDa coated vesicle protein C) (Adaptor protein complex AP-2 subunit alpha-2) (Adaptor-related protein complex 2 subunit alpha-2) (Alpha-adaptin C) (Alpha2-adaptin) (Clathrin assembly protein complex 2 alpha-C large chain) (Plasma membrane adaptor HA2/AP2 adaptin alpha C subunit)	Ap2a2 Adtab	938	31.11	0.792063	29.1738	0.852843	0.937763	0.0274138	>0.05
P18666	ML12B_RAT	Myosin regulatory light chain 12B (Myosin RLC-B) (Myosin regulatory light chain 2-B, smooth muscle isoform) (MLC-2) (Myosin regulatory light chain 20 kDa) (MLC20) (Myosin regulatory light chain MRLC2)	Myl12b Mrlc2 Mrlcb Mylc2b	172	3.41193	0.321633	1.31961	0.300852	0.386764	0.0881766	<0.05
P19103	PPR1A_RAT	Protein phosphatase 1 regulatory subunit 1A (Protein phosphatase inhibitor 1) (I-1) (IPP-1)	Ppp1r1a Ipp1	171	0.788707	0.323338	0.71835	0.221061	0.910795	0.280283	>0.05
P19139	CSK21_RAT	Casein kinase II subunit alpha (CK II alpha) (EC 2.7.11.1)	Csnk2a1	391	3.79939	0.381912	4.80934	0.31041	1.26582	0.0817	>0.05
P19234	NDUV2_RAT	NADH dehydrogenase [ubiquinone] flavoprotein 2, mitochondrial (EC 1.6.5.3) (EC 1.6.99.3) (NADH-ubiquinone oxidoreductase 24 kDa subunit)	Ndufv2	248	8.90901	0.438324	8.98591	0.669557	1.00863	0.0751551	>0.05
P19490	GRIA1_RAT	Glutamate receptor 1 (GluR-1) (AMPA-selective glutamate receptor 1) (GluR-A) (GluR-K1) (Glutamate receptor ionotropic, AMPA 1) (GluA1)	Gria1 Glur1	907	0.093649	0.093649	0.51138	0.274423	5.4606	2.93033	>0.05
P19492	GRIA3_RAT	Glutamate receptor 3 (GluR-3) (AMPA-selective glutamate receptor 3) (GluR-C) (GluR-K3) (Glutamate receptor ionotropic, AMPA 3) (GluA3)	Gria3 Glur3	888	1.55955	0.209394	2.14696	0.234661	1.37666	0.150467	>0.05
P19511	AT5F1_RAT	ATP synthase F(0) complex subunit B1, mitochondrial (ATP synthase subunit b) (ATPase subunit b)	Atp5f1 Atp5f	256	15.4614	0.555598	16.8648	1.12594	1.09077	0.0728226	>0.05
P19527	NFL_RAT	Neurofilament light polypeptide (NF-L) (68 kDa neurofilament protein) (Neurofilament triplet L protein)	Nefl Nf68 Nfl	542	41.3729	0.800636	42.5808	1.67447	1.0292	0.0404725	>0.05
P19627	GNAZ_RAT	Guanine nucleotide-binding protein G(z) subunit alpha (G(x) alpha chain) (Gz-alpha)	Gnaz	355	4.9971	0.538793	5.12181	0.320373	1.02496	0.0641117	>0.05
P19643	AOFB_RAT	Amine oxidase [flavin-containing] B (EC 1.4.3.4) (Monoamine oxidase type B) (MAO-B)	Maob	520	2.54588	0.338258	1.74008	0.268262	0.683489	0.105371	>0.05
P19804	NDKB_RAT	Nucleoside diphosphate kinase B (NDK B) (NDP kinase B) (EC 2.7.4.6) (Histidine protein kinase NDKB) (EC 2.7.13.3) (P18)	Nme2	152	32.0671	0.624216	31.5047	1.16997	0.982462	0.0364851	>0.05
P19944	RLA1_RAT	60S acidic ribosomal protein P1	Rplp1	114	2.15457	0.32224	1.94492	0.284634	0.902695	0.132107	>0.05
P19945	RLA0_RAT	60S acidic ribosomal protein P0 (60S ribosomal protein L10E)	Rplp0 Arbp	317	4.60065	0.448058	6.24334	0.324831	1.35706	0.0706055	<0.05
P20070	NB5R3_RAT	NADH-cytochrome b5 reductase 3 (B5R) (Cytochrome b5 reductase) (EC 1.6.2.2) (Diaphorase-1) [Cleaved into: NADH-cytochrome b5 reductase 3 membrane-bound form; NADH-cytochrome b5 reductase 3 soluble form]	Cyb5r3 Dia1	301	0.693524	0.257714	0.61538	0.224792	0.887323	0.324131	>0.05
P20171	RASH_RAT	GTPase HRas (H-Ras-1) (Transforming protein p21) (c-H-ras) (p21ras) [Cleaved into: GTPase HRas, N-terminally processed]	Hras Hras1	189	4.70102	0.25661	5.72991	0.382554	1.21887	0.0813767	<0.05
P20650	PPM1A_RAT	Protein phosphatase 1A (EC 3.1.3.16) (Protein phosphatase 2C isoform alpha) (PP2C-alpha) (Protein phosphatase IA)	Ppm1a Pp2c1 Pppm1a	382	2.05721	0.406836	2.75454	0.396856	1.33897	0.19291	>0.05
P20651	PP2BB_RAT	Serine/threonine-protein phosphatase 2B catalytic subunit beta isoform (EC 3.1.3.16) (CAM-PRP catalytic subunit) (Calmodulin-dependent calcineurin A subunit beta isoform)	Ppp3cb	525	20.4529	0.899152	21.3804	0.876878	1.04535	0.042873	>0.05
P20788	UCRI_RAT	Cytochrome b-c1 complex subunit Rieske, mitochondrial (EC 1.10.2.2) (Complex III subunit 5) (Cytochrome b-c1 complex subunit 5) (Liver regeneration-related protein LRRGT00195) (Rieske iron-sulfur protein) (RISP) (Ubiquinol-cytochrome c reductase iron-sulfur subunit) [Cleaved into: Cytochrome b-c1 complex subunit 11 (Complex III subunit IX) (Ubiquinol-cytochrome c reductase 8 kDa protein)]	Uqcrfs1	274	9.78266	0.462793	8.89894	0.431031	0.909665	0.0440607	>0.05
P21396	AOFA_RAT	Amine oxidase [flavin-containing] A (EC 1.4.3.4) (Monoamine oxidase type A) (MAO-A)	Maoa	526	3.70313	0.303052	4.39865	0.262037	1.18782	0.0707609	>0.05
P21531	RL3_RAT	60S ribosomal protein L3 (L4)	Rpl3	403	1.95719	0.209667	1.12221	0.17951	0.573377	0.0917184	<0.05
P21533	RL6_RAT	60S ribosomal protein L6 (Neoplasm-related protein C140)	Rpl6	298	2.7484	0.391169	1.63288	0.40854	0.594118	0.148646	>0.05
P21571	ATP5J_RAT	ATP synthase-coupling factor 6, mitochondrial (ATPase subunit F6)	Atp5j	108	15.5704	0.803259	15.8537	0.786196	1.01819	0.050493	>0.05
P21575	DYN1_RAT	Dynamin-1 (EC 3.6.5.5) (B-dynamin) (D100) (Dynamin, brain)	Dnm1 Dnm	864	63.7525	1.59294	62.8349	2.08992	0.985607	0.0327817	>0.05
P21707	SYT1_RAT	Synaptotagmin-1 (Synaptotagmin I) (SytI) (p65)	Syt1	421	44.5557	0.898489	36.2305	0.967504	0.813151	0.0217145	<0.05
P21913	SDHB_RAT	Succinate dehydrogenase [ubiquinone] iron-sulfur subunit, mitochondrial (EC 1.3.5.1) (Iron-sulfur subunit of complex II) (Ip)	Sdhb Sdh1	282	3.6287	0.308846	5.11676	0.344773	1.41008	0.0950128	<0.05
P22062	PIMT_RAT	Protein-L-isoaspartate(D-aspartate) O-methyltransferase (PIMT) (EC 2.1.1.77) (L-isoaspartyl protein carboxyl methyltransferase) (Protein L-isoaspartyl/D-aspartyl methyltransferase) (Protein-beta-aspartate methyltransferase)	Pcmt1	227	11.4587	0.676768	12.2678	0.564964	1.0706	0.0493042	>0.05
P22063	CNTN2_RAT	Contactin-2 (Axonal glycoprotein TAG-1) (Axonin-1) (Transient axonal glycoprotein 1) (TAX-1)	Cntn2 Tax1	1040	1.66581	0.210244	1.33454	0.270326	0.801134	0.162279	>0.05
P23358	RL12_RAT	60S ribosomal protein L12	Rpl12	165	3.4266	0.168641	3.17039	0.182409	0.925229	0.0532333	>0.05
P23514	COPB_RAT	Coatomer subunit beta (Beta-coat protein) (Beta-COP)	Copb1 Copb	953	0.584838	0.215051	0.20545	0.136971	0.351294	0.234203	>0.05
P23565	AINX_RAT	Alpha-internexin (Alpha-Inx)	Ina Inexa	505	70.1288	1.1246	75.6228	1.2511	1.07834	0.01784	<0.05
P23965	ECI1_RAT	Enoyl-CoA delta isomerase 1, mitochondrial (EC 5.3.3.8) (3,2-trans-enoyl-CoA isomerase) (Delta(3),Delta(2)-enoyl-CoA isomerase) (D3,D2-enoyl-CoA isomerase) (Dodecenoyl-CoA isomerase)	Eci1 Dci	289	1.26888	0.145834	0.924466	0.286556	0.728568	0.225833	>0.05
P23977	SC6A3_RAT	Sodium-dependent dopamine transporter (DA transporter) (DAT) (Solute carrier family 6 member 3)	Slc6a3	619	1.07946	0.104526	1.12449	0.184039	1.04172	0.170492	>0.05
P23978	SC6A1_RAT	Sodium- and chloride-dependent GABA transporter 1 (GAT-1) (Solute carrier family 6 member 1)	Slc6a1 Gabt1 Gat-1 Gat1	599	3.71365	0.189029	3.68	0.268677	0.990939	0.0723485	>0.05
P24049	RL17_RAT	60S ribosomal protein L17 (Amino acid starvation-induced protein) (ASI) (L23)	Rpl17	184	1.56359	0.158428	1.12174	0.23612	0.717412	0.151011	>0.05
P24155	THOP1_RAT	Thimet oligopeptidase (EC 3.4.24.15) (Endo-oligopeptidase A) (Endopeptidase 24.15) (PZ-peptidase) (Soluble metallo-endopeptidase)	Thop1	687	2.2449	0.383257	1.43421	0.16915	0.638872	0.0753485	>0.05
P24329	THTR_RAT	Thiosulfate sulfurtransferase (EC 2.8.1.1) (Rhodanese)	Tst	297	4.2181	0.275561	3.06325	0.54545	0.726215	0.129312	>0.05
P24368	PPIB_RAT	Peptidyl-prolyl cis-trans isomerase B (PPIase B) (EC 5.2.1.8) (CYP-S1) (Cyclophilin B) (Rotamase B) (S-cyclophilin) (SCYLP)	Ppib	216	0.677647	0.291759	0.506466	0.168851	0.747389	0.249172	>0.05
P24942	EAA1_RAT	Excitatory amino acid transporter 1 (Glial glutamate transporter) (Sodium-dependent glutamate/aspartate transporter 1) (GLAST-1) (Solute carrier family 1 member 3)	Slc1a3 Eaat1	543	13.2955	0.411902	10.2307	0.407	0.769487	0.0306118	<0.05
P25113	PGAM1_RAT	Phosphoglycerate mutase 1 (EC 3.1.3.13) (EC 5.4.2.11) (EC 5.4.2.4) (BPG-dependent PGAM 1) (Phosphoglycerate mutase isozyme B) (PGAM-B)	Pgam1	254	44.6417	1.27064	45.938	1.26113	1.02904	0.0282501	>0.05
P25304	AGRIN_RAT	Agrin [Cleaved into: Agrin N-terminal 110 kDa subunit; Agrin C-terminal 110 kDa subunit; Agrin C-terminal 90 kDa fragment (C90); Agrin C-terminal 22 kDa fragment (C22)]	Agrn Agrin	1959	1.46152	0.390665	1.43698	0.466919	0.983205	0.319474	>0.05
P26284	ODPA_RAT	Pyruvate dehydrogenase E1 component subunit alpha, somatic form, mitochondrial (EC 1.2.4.1) (PDHE1-A type I)	Pdha1	390	24.4475	0.732787	21.2848	0.805324	0.870633	0.032941	<0.05
P26453	BASI_RAT	Basigin (Glycoprotein CE9) (OX-47 antigen) (CD antigen CD147)	Bsg	388	2.74553	0.439984	3.27328	0.567614	1.19222	0.206741	>0.05
P26772	CH10_RAT	10 kDa heat shock protein, mitochondrial (Hsp10) (10 kDa chaperonin) (Chaperonin 10) (CPN10)	Hspe1	102	12.0258	0.467446	11.0398	0.518024	0.918014	0.0430761	>0.05
P27139	CAH2_RAT	Carbonic anhydrase 2 (EC 4.2.1.1) (Carbonate dehydratase II) (Carbonic anhydrase II) (CA-II)	Ca2	260	8.21619	0.35965	7.88732	0.626198	0.959973	0.0762151	>0.05
P27274	CD59_RAT	CD59 glycoprotein (MAC-inhibitory protein) (MAC-IP) (Membrane attack complex inhibition factor) (MACIF) (Protectin) (CD antigen CD59)	Cd59	126	0.978535	0.00729035	1.12967	0.185571	1.15445	0.189642	>0.05
P27605	HPRT_RAT	Hypoxanthine-guanine phosphoribosyltransferase (HGPRT) (HGPRTase) (EC 2.4.2.8)	Hprt1 Hprt	218	4.29855	0.32651	3.37354	0.373045	0.784809	0.0867838	>0.05
P27653	C1TC_RAT	C-1-tetrahydrofolate synthase, cytoplasmic (C1-THF synthase) [Cleaved into: C-1-tetrahydrofolate synthase, cytoplasmic, N-terminally processed] [Includes: Methylenetetrahydrofolate dehydrogenase (EC 1.5.1.5); Methenyltetrahydrofolate cyclohydrolase (EC 3.5.4.9); Formyltetrahydrofolate synthetase (EC 6.3.4.3)]	Mthfd1 Mthfd	935	1.46555	0.370728	1.63991	0.489672	1.11897	0.334122	>0.05
P27682	7B2_RAT	Neuroendocrine protein 7B2 (Secretogranin V) (Secretogranin-5) (Secretory granule endocrine protein I) [Cleaved into: N-terminal peptide; C-terminal peptide]	Scg5 Sgne1	210	0.793089	0.199209	1.22572	0.133365	1.5455	0.168159	>0.05
P28075	PSB5_RAT	Proteasome subunit beta type-5 (EC 3.4.25.1) (Macropain epsilon chain) (Multicatalytic endopeptidase complex epsilon chain) (Proteasome chain 6) (Proteasome epsilon chain) (Proteasome subunit X)	Psmb5	263	0	0	0.3016	0.214588	N/A	N/A	>0.05
P28480	TCPA_RAT	T-complex protein 1 subunit alpha (TCP-1-alpha) (CCT-alpha)	Tcp1 Cct1 Ccta	556	7.53649	0.59185	7.57072	0.650067	1.00454	0.086256	>0.05
P29066	ARRB1_RAT	Beta-arrestin-1 (Arrestin beta-1)	Arrb1	418	1.18215	0.200366	0.510126	0.170081	0.431523	0.143874	<0.05
P29147	BDH_RAT	D-beta-hydroxybutyrate dehydrogenase, mitochondrial (BDH) (EC 1.1.1.30) (3-hydroxybutyrate dehydrogenase)	Bdh1 Bdh	343	2.54592	0.262915	2.75706	0.29998	1.08293	0.117828	>0.05
P29266	3HIDH_RAT	3-hydroxyisobutyrate dehydrogenase, mitochondrial (HIBADH) (EC 1.1.1.31)	Hibadh	335	2.3517	0.265483	0.818606	0.205922	0.348091	0.0875631	<0.05
P29314	RS9_RAT	40S ribosomal protein S9	Rps9	194	0.786262	0.195673	0.61207	0.224125	0.778456	0.285052	>0.05
P29315	RINI_RAT	Ribonuclease inhibitor (Ribonuclease/angiogenin inhibitor 1)	Rnh1 Rnh	456	2.55812	0.344611	1.83219	0.327423	0.716226	0.127994	>0.05
P29411	KAD3_RAT	GTP:AMP phosphotransferase AK3, mitochondrial (EC 2.7.4.10) (Adenylate kinase 3) (AK 3) (Adenylate kinase 3 alpha-like 1)	Ak3 Ak3l1 Akl3l	227	1.26889	0.205447	1.53472	0.170637	1.2095	0.134477	>0.05
P29419	ATP5I_RAT	ATP synthase subunit e, mitochondrial (ATPase subunit e)	Atp5i	71	2.34605	0.257896	2.86491	0.254163	1.22116	0.108337	>0.05
P30009	MARCS_RAT	Myristoylated alanine-rich C-kinase substrate (MARCKS) (Protein kinase C substrate 80 kDa protein)	Marcks Macs	309	13.415	0.455879	11.7475	0.670473	0.875702	0.0499794	>0.05
P30427	PLEC_RAT	Plectin (PCN) (PLTN) (Plectin-1)	Plec Plec1	4687	16.7294	1.25511	13.4147	1.0376	0.801863	0.0620225	>0.05
P30835	PFKAL_RAT	ATP-dependent 6-phosphofructokinase, liver type (ATP-PFK) (PFK-L) (EC 2.7.1.11) (6-phosphofructokinase type B) (Phosphofructo-1-kinase isozyme B) (PFK-B) (Phosphohexokinase)	Pfkl Pfk-l	780	6.75233	0.407945	7.47297	0.48654	1.10672	0.0720551	>0.05
P31000	VIME_RAT	Vimentin	Vim	466	8.79535	0.256319	8.9004	0.530018	1.01194	0.0602611	>0.05
P31016	DLG4_RAT	Disks large homolog 4 (Postsynaptic density protein 95) (PSD-95) (Synapse-associated protein 90) (SAP-90) (SAP90)	Dlg4 Dlgh4 Psd95	724	12.0147	0.468697	14.2175	0.594718	1.18334	0.0494992	<0.05
P31044	PEBP1_RAT	Phosphatidylethanolamine-binding protein 1 (PEBP-1) (23 kDa morphine-binding protein) (HCNPpp) (P23K) [Cleaved into: Hippocampal cholinergic neurostimulating peptide (HCNP)]	Pebp1 Pbp Pebp	187	29.5717	0.850014	30.1941	0.528568	1.02105	0.0178741	>0.05
P31399	ATP5H_RAT	ATP synthase subunit d, mitochondrial (ATPase subunit d)	Atp5h Atp5jd	161	21.0639	0.873772	19.5374	0.551115	0.92753	0.0261639	>0.05
P31422	GRM3_RAT	Metabotropic glutamate receptor 3 (mGluR3)	Grm3 Gprc1c Mglur3	879	2.15464	0.318683	1.94052	0.2804	0.900623	0.130137	>0.05
P31424	GRM5_RAT	Metabotropic glutamate receptor 5 (mGluR5)	Grm5 Gprc1e Mglur5	1203	0.597064	0.220633	0.302936	0.154261	0.507376	0.258366	>0.05
P31596	EAA2_RAT	Excitatory amino acid transporter 2 (GLT-1) (Sodium-dependent glutamate/aspartate transporter 2) (GLUT-R) (Solute carrier family 1 member 2)	Slc1a2 Eaat2 Glt1	573	59.2762	1.06171	58.3385	1.07118	0.984181	0.018071	>0.05
P31647	S6A11_RAT	Sodium- and chloride-dependent GABA transporter 3 (GAT-3) (Solute carrier family 6 member 11)	Slc6a11 Gabt3 Gat-3 Gat-b	627	1.67143	0.215367	2.25167	0.207171	1.34715	0.123949	>0.05
P31662	S6A17_RAT	Sodium-dependent neutral amino acid transporter SLC6A17 (Sodium-dependent neurotransmitter transporter NTT4) (Solute carrier family 6 member 17)	Slc6a17 Ntt4 Rxt1	727	1.95979	0.151921	0.819516	0.25596	0.418166	0.130606	<0.05
P31977	EZRI_RAT	Ezrin (Cytovillin) (Villin-2) (p81)	Ezr Vil2	586	4.00376	0.359645	4.19072	0.573194	1.0467	0.143164	>0.05
P32551	QCR2_RAT	Cytochrome b-c1 complex subunit 2, mitochondrial (Complex III subunit 2) (Core protein II) (Ubiquinol-cytochrome-c reductase complex core protein 2)	Uqcrc2	452	31.4979	0.56136	29.1709	0.778052	0.926122	0.0247017	<0.05
P32736	OPCM_RAT	Opioid-binding protein/cell adhesion molecule (OBCAM) (OPCML) (Opioid-binding cell adhesion molecule)	Opcml Obcam	345	4.49385	0.291842	4.90657	0.246852	1.09184	0.054931	>0.05
P33124	ACSL6_RAT	Long-chain-fatty-acid--CoA ligase 6 (EC 6.2.1.3) (Long-chain acyl-CoA synthetase 6) (LACS 6) (Long-chain-fatty-acid--CoA ligase, brain isozyme)	Acsl6 Acs2 Facl6	697	3.82494	0.402449	2.35182	0.430742	0.614864	0.112614	<0.05
P34058	HS90B_RAT	Heat shock protein HSP 90-beta (Heat shock 84 kDa) (HSP 84) (HSP84)	Hsp90ab1 Hsp84 Hspcb	724	53.7861	0.897688	54.0203	1.10258	1.00435	0.0204993	>0.05
P35171	CX7A2_RAT	Cytochrome c oxidase subunit 7A2, mitochondrial (Cytochrome c oxidase subunit VIIa-liver/heart) (Cytochrome c oxidase subunit VIIa-L)	Cox7a2 Cox7a3 Cox7al	83	4.9025	0.305062	4.18552	0.307617	0.853752	0.062747	>0.05
P35213	1433B_RAT	14-3-3 protein beta/alpha (Prepronerve growth factor RNH-1) (Protein kinase C inhibitor protein 1) (KCIP-1) [Cleaved into: 14-3-3 protein beta/alpha, N-terminally processed]	Ywhab	246	51.5758	1.8275	59.9088	1.88888	1.16157	0.0366233	<0.05
P35234	PTN5_RAT	Tyrosine-protein phosphatase non-receptor type 5 (EC 3.1.3.48) (Neural-specific protein-tyrosine phosphatase) (Striatum-enriched protein-tyrosine phosphatase) (STEP)	Ptpn5	369	3.81791	0.23637	2.45367	0.405055	0.642674	0.106093	<0.05
P35280	RAB8A_RAT	Ras-related protein Rab-8A	Rab8a Rab8	207	10.7705	0.293844	10.3176	0.647569	0.957952	0.0601246	>0.05
P35332	HPCL4_RAT	Hippocalcin-like protein 4 (Neural visinin-like protein 2) (NVL-2) (NVP-2) (Visinin-like protein 2) (VILIP-2)	Hpcal4	191	6.74253	0.387517	5.94396	0.441596	0.881562	0.065494	>0.05
P35439	NMDZ1_RAT	Glutamate receptor ionotropic, NMDA 1 (GluN1) (Glutamate [NMDA] receptor subunit zeta-1) (N-methyl-D-aspartate receptor subunit NR1) (NMD-R1)	Grin1 Nmdar1	938	0.780183	0.192181	0.61524	0.167492	0.788584	0.214683	>0.05
P35465	PAK1_RAT	Serine/threonine-protein kinase PAK 1 (EC 2.7.11.1) (Alpha-PAK) (Protein kinase MUK2) (p21-activated kinase 1) (PAK-1) (p68-PAK)	Pak1	544	5.08111	0.395302	4.50356	0.555436	0.886334	0.109314	>0.05
P35565	CALX_RAT	Calnexin	Canx	591	8.34523	0.669536	10.1206	0.696164	1.21274	0.0834206	>0.05
P35571	GPDM_RAT	Glycerol-3-phosphate dehydrogenase, mitochondrial (GPD-M) (GPDH-M) (EC 1.1.5.3)	Gpd2	727	2.05772	0.274648	2.55683	0.225951	1.24255	0.109806	>0.05
P35704	PRDX2_RAT	Peroxiredoxin-2 (EC 1.11.1.15) (Thiol-specific antioxidant protein) (TSA) (Thioredoxin peroxidase 1) (Thioredoxin-dependent peroxide reductase 1)	Prdx2 Tdpx1	198	12.832	0.810578	11.7668	0.46747	0.916985	0.03643	>0.05
P36201	CRIP2_RAT	Cysteine-rich protein 2 (CRP-2) (Protein ESP1)	Crip2 Crp2	208	5.18618	0.290184	5.42782	0.278728	1.04659	0.0537443	>0.05
P36876	2ABA_RAT	Serine/threonine-protein phosphatase 2A 55 kDa regulatory subunit B alpha isoform (PP2A subunit B isoform B55-alpha) (PP2A subunit B isoform BRA) (PP2A subunit B isoform PR55-alpha) (PP2A subunit B isoform R2-alpha) (PP2A subunit B isoform alpha)	Ppp2r2a	447	2.34933	0.298715	1.63152	0.309261	0.69446	0.131637	>0.05
P36970	GPX41_RAT	Phospholipid hydroperoxide glutathione peroxidase, mitochondrial (PHGPx) (EC 1.11.1.12) (Glutathione peroxidase 4) (GPx-4) (GSHPx-4)	Gpx4	197	0.781673	0.192291	0.20795	0.138636	0.266032	0.177358	<0.05
P36972	APT_RAT	Adenine phosphoribosyltransferase (APRT) (EC 2.4.2.7)	Aprt	180	1.75696	0.240353	1.02254	0.304377	0.581993	0.17324	>0.05
P37285	KLC1_RAT	Kinesin light chain 1 (KLC 1)	Klc1 Klc Kns2	560	1.46695	0.162693	0.922086	0.285111	0.628574	0.194356	>0.05
P37377	SYUA_RAT	Alpha-synuclein	Snca	140	26.8177	0.669824	27.5059	0.664309	1.02566	0.0247713	>0.05
P37397	CNN3_RAT	Calponin-3 (Calponin, acidic isoform) (Calponin, non-muscle isoform)	Cnn3	330	0.575222	0.209821	0.20398	0.136004	0.354611	0.236437	>0.05
P37805	TAGL3_RAT	Transgelin-3 (Neuronal protein 22) (NP22) (Neuronal protein NP25)	Tagln3 Np25	199	10.0571	0.458088	8.27965	0.529654	0.823268	0.0526649	<0.05
P37996	ARL3_RAT	ADP-ribosylation factor-like protein 3 (ARD3)	Arl3	182	0.689876	0.211876	0.20534	0.136893	0.297648	0.198432	>0.05
P38650	DYHC1_RAT	Cytoplasmic dynein 1 heavy chain 1 (Cytoplasmic dynein heavy chain 1) (Dynein heavy chain, cytosolic) (MAP 1C)	Dync1h1 Dhc1 Dnch1 Dnchc1 Dnec1 Dyhc Map1c	4644	34.1519	1.6447	30.2554	0.897321	0.885907	0.0262744	>0.05
P38656	LA_RAT	Lupus La protein homolog (La autoantigen homolog) (La ribonucleoprotein)	Ssb Ss-b	415	0.394556	0.217375	0	0	0	0	>0.05
P38718	MPC2_RAT	Mitochondrial pyruvate carrier 2 (Brain protein 44) (Protein 0-44)	Mpc2 Brp44	127	2.43847	0.35746	2.25258	0.14045	0.923768	0.0575975	>0.05
P38983	RSSA_RAT	40S ribosomal protein SA (37 kDa laminin receptor precursor) (37LRP) (37/67 kDa laminin receptor) (LRP/LR) (67 kDa laminin receptor) (67LR) (Laminin receptor 1) (LamR) (Laminin-binding protein precursor p40) (LBP/p40)	Rpsa Lamr1	295	3.71663	0.381286	4.09907	0.276144	1.1029	0.0742994	>0.05
P39052	DYN2_RAT	Dynamin-2 (EC 3.6.5.5)	Dnm2 Dyn2	870	13.1938	0.594805	11.7708	0.773856	0.892149	0.0586531	>0.05
P39069	KAD1_RAT	Adenylate kinase isoenzyme 1 (AK 1) (EC 2.7.4.3) (EC 2.7.4.6) (ATP-AMP transphosphorylase 1) (ATP:AMP phosphotransferase) (Adenylate monophosphate kinase) (Myokinase)	Ak1	194	9.90383	0.627257	8.67706	0.609336	0.876132	0.0615253	>0.05
P40112	PSB3_RAT	Proteasome subunit beta type-3 (EC 3.4.25.1) (Proteasome chain 13) (Proteasome component C10-II) (Proteasome theta chain)	Psmb3	205	0.496139	0.223606	0.41188	0.168179	0.830171	0.338975	>0.05
P40241	CD9_RAT	CD9 antigen (CD antigen CD9)	Cd9	226	1.55891	0.207729	2.66128	0.350536	1.70714	0.22486	<0.05
P41498	PPAC_RAT	Low molecular weight phosphotyrosine protein phosphatase (LMW-PTP) (LMW-PTPase) (EC 3.1.3.48) (Low molecular weight cytosolic acid phosphatase) (EC 3.1.3.2)	Acp1	158	2.34657	0.215446	1.83195	0.289471	0.780694	0.123359	>0.05
P41499	PTN11_RAT	Tyrosine-protein phosphatase non-receptor type 11 (EC 3.1.3.48) (Protein-tyrosine phosphatase 1D) (PTP-1D) (Protein-tyrosine phosphatase SYP) (SH-PTP2) (SHP-2) (Shp2)	Ptpn11	597	0.49263	0.222771	0.71463	0.264434	1.45064	0.536779	>0.05
P41542	USO1_RAT	General vesicular transport factor p115 (Protein USO1 homolog) (Transcytosis-associated protein) (TAP) (Vesicle-docking protein)	Uso1 Vdp	959	1.66667	0.260222	1.12732	0.186485	0.676389	0.111891	>0.05
P41562	IDHC_RAT	Isocitrate dehydrogenase [NADP] cytoplasmic (IDH) (EC 1.1.1.42) (Cytosolic NADP-isocitrate dehydrogenase) (IDP) (NADP(+)-specific ICDH) (Oxalosuccinate decarboxylase)	Idh1	414	0.595083	0.265073	1.02473	0.215201	1.72199	0.361632	>0.05
P42123	LDHB_RAT	L-lactate dehydrogenase B chain (LDH-B) (EC 1.1.1.27) (LDH heart subunit) (LDH-H)	Ldhb Ldh-2 Ldh2	334	57.7574	1.13518	57.2828	0.986731	0.991783	0.0170841	>0.05
P43138	APEX1_RAT	DNA-(apurinic or apyrimidinic site) lyase (EC 3.1.-.-) (EC 4.2.99.18) (APEX nuclease) (APEN) (Apurinic-apyrimidinic endonuclease 1) (AP endonuclease 1) (REF-1) (Redox factor-1) [Cleaved into: DNA-(apurinic or apyrimidinic site) lyase, mitochondrial]	Apex1 Ape Apex Ref1	317	0.481587	0.217189	1.53607	0.231086	3.1896	0.479843	<0.05
P43244	MATR3_RAT	Matrin-3 (Nuclear scaffold protein p130/MAT3)	Matr3	845	8.0165	0.495968	5.51787	0.364952	0.688314	0.0455252	<0.05
P43425	GBG7_RAT	Guanine nucleotide-binding protein G(I)/G(S)/G(O) subunit gamma-7	Gng7 Gngt7	68	6.25831	0.328522	6.24001	0.359298	0.997076	0.0574114	>0.05
P45479	PPT1_RAT	Palmitoyl-protein thioesterase 1 (PPT-1) (EC 3.1.2.22) (Palmitoyl-protein hydrolase 1)	Ppt1 Ppt	306	1.76605	0.13562	1.02011	0.213417	0.577624	0.120845	<0.05
P45592	COF1_RAT	Cofilin-1 (Cofilin, non-muscle isoform)	Cfl1	166	57.5671	1.4336	59.707	1.51159	1.03717	0.0262578	>0.05
P45953	ACADV_RAT	Very long-chain specific acyl-CoA dehydrogenase, mitochondrial (VLCAD) (EC 1.3.8.9)	Acadvl Vlcad	655	1.07663	0.098633	1.01292	0.298241	0.940826	0.277014	>0.05
P46101	DPP6_RAT	Dipeptidyl aminopeptidase-like protein 6 (DPPX) (Dipeptidyl aminopeptidase-related protein) (Dipeptidyl peptidase 6) (Dipeptidyl peptidase IV-like protein) (Dipeptidyl peptidase VI) (DPP VI)	Dpp6	859	5.3973	0.46488	4.29915	0.430348	0.796537	0.0797339	>0.05
P46462	TERA_RAT	Transitional endoplasmic reticulum ATPase (TER ATPase) (EC 3.6.4.6) (15S Mg(2+)-ATPase p97 subunit) (Valosin-containing protein) (VCP)	Vcp	806	22.2095	0.497644	23.3233	1.08249	1.05015	0.0487397	>0.05
P46844	BIEA_RAT	Biliverdin reductase A (BVR A) (EC 1.3.1.24) (Biliverdin-IX alpha-reductase)	Blvra Blvr	295	0.97353	0.206691	0.305806	0.155733	0.314121	0.159968	<0.05
P47727	CBR1_RAT	Carbonyl reductase [NADPH] 1 (EC 1.1.1.184) (15-hydroxyprostaglandin dehydrogenase [NADP(+)]) (EC 1.1.1.197) (20-beta-hydroxysteroid dehydrogenase) (NADPH-dependent carbonyl reductase 1) (Prostaglandin 9-ketoreductase) (Prostaglandin-E(2) 9-reductase) (EC 1.1.1.189)	Cbr1 Cbr	277	4.40264	0.216759	4.80505	0.368798	1.0914	0.0837676	>0.05
P47728	CALB2_RAT	Calretinin (CR)	Calb2	271	2.25487	0.211063	2.45712	0.383416	1.0897	0.170039	>0.05
P47819	GFAP_RAT	Glial fibrillary acidic protein (GFAP)	Gfap	430	20.7573	0.684981	21.6885	0.291745	1.04486	0.0140551	>0.05
P47860	PFKAP_RAT	ATP-dependent 6-phosphofructokinase, platelet type (ATP-PFK) (PFK-P) (EC 2.7.1.11) (6-phosphofructokinase type C) (Phosphofructo-1-kinase isozyme C) (PFK-C) (Phosphohexokinase)	Pfkp Pfkc	788	22.4816	0.557682	23.1073	1.05234	1.02783	0.0468088	>0.05
P47863	AQP4_RAT	Aquaporin-4 (AQP-4) (Mercurial-insensitive water channel) (MIWC) (WCH4)	Aqp4	323	4.89204	0.292973	6.94761	0.441735	1.42019	0.0902967	<0.05
P47875	CSRP1_RAT	Cysteine and glycine-rich protein 1 (Cysteine-rich protein 1) (CRP) (CRP1)	Csrp1 Csrp	193	3.32384	0.360188	4.39904	0.217751	1.32348	0.0655119	<0.05
P47942	DPYL2_RAT	Dihydropyrimidinase-related protein 2 (DRP-2) (Collapsin response mediator protein 2) (CRMP-2) (Turned on after division 64 kDa protein) (TOAD-64)	Dpysl2	572	267.979	4.84944	290.335	2.7542	1.08342	0.0102777	<0.05
P47971	NPTX1_RAT	Neuronal pentraxin-1 (NP1) (47 kDa taipoxin-binding protein) (Neuronal pentraxin I) (NP-I)	Nptx1	432	1.7569	0.286084	2.24783	0.253237	1.27943	0.144139	>0.05
P48004	PSA7_RAT	Proteasome subunit alpha type-7 (EC 3.4.25.1) (Proteasome subunit RC6-1)	Psma7	254	0.978535	0.00729035	1.42348	0.267285	1.45471	0.273149	>0.05
P48500	TPIS_RAT	Triosephosphate isomerase (TIM) (EC 5.3.1.1) (Triose-phosphate isomerase)	Tpi1	249	48.9218	1.5643	57.9629	1.99785	1.18481	0.0408376	<0.05
P48721	GRP75_RAT	Stress-70 protein, mitochondrial (75 kDa glucose-regulated protein) (GRP-75) (Heat shock 70 kDa protein 9) (Mortalin) (Peptide-binding protein 74) (PBP74) (mtHSP70)	Hspa9 Grp75 Hspa9a	679	21.106	0.423657	20.6625	0.666545	0.978987	0.0315808	>0.05
P48768	NAC2_RAT	Sodium/calcium exchanger 2 (Na(+)/Ca(2+)-exchange protein 2) (Solute carrier family 8 member 2)	Slc8a2 Ncx2	921	8.79372	0.355094	7.4706	0.742729	0.849538	0.0844613	>0.05
P49242	RS3A_RAT	40S ribosomal protein S3a (V-fos transformation effector protein) [Cleaved into: 40S ribosomal protein S3b]	Rps3a Fte-1 Fte1	264	3.71413	0.453035	2.96438	0.28114	0.798136	0.0756948	>0.05
P49432	ODPB_RAT	Pyruvate dehydrogenase E1 component subunit beta, mitochondrial (PDHE1-B) (EC 1.2.4.1)	Pdhb	359	25.7083	0.822267	24.0544	0.939026	0.935667	0.0365262	>0.05
P49803	RGS7_RAT	Regulator of G-protein signaling 7 (RGS7)	Rgs7	477	3.72323	0.540136	2.65772	0.37668	0.713821	0.10117	>0.05
P49911	AN32A_RAT	Acidic leucine-rich nuclear phosphoprotein 32 family member A (Leucine-rich acidic nuclear protein) (LANP)	Anp32a Lanp	247	2.74517	0.294061	2.04799	0.217731	0.746035	0.0793144	>0.05
P50398	GDIA_RAT	Rab GDP dissociation inhibitor alpha (Rab GDI alpha) (Guanosine diphosphate dissociation inhibitor 1) (GDI-1)	Gdi1 Rabgdia	447	69.0912	1.58642	62.2261	1.54527	0.900637	0.0223657	<0.05
P50399	GDIB_RAT	Rab GDP dissociation inhibitor beta (Rab GDI beta) (GDI-3) (Guanosine diphosphate dissociation inhibitor 2) (GDI-2)	Gdi2 Gdi3	445	23.2675	0.564711	21.9902	0.755921	0.945104	0.0324883	>0.05
P50408	VATF_RAT	V-type proton ATPase subunit F (V-ATPase subunit F) (V-ATPase 14 kDa subunit) (Vacuolar proton pump subunit F)	Atp6v1f Atp6s14 Vatf	119	3.03776	0.470887	2.25902	0.458084	0.743648	0.150797	>0.05
P50411	IPP2_RAT	Protein phosphatase inhibitor 2 (IPP-2)	Ppp1r2 Ipp2	205	0.971107	0.201112	0.20336	0.135584	0.20941	0.139618	<0.05
P50475	SYAC_RAT	Alanine--tRNA ligase, cytoplasmic (EC 6.1.1.7) (Alanyl-tRNA synthetase) (AlaRS)	Aars	968	3.13207	0.322862	3.27445	0.334555	1.04546	0.106816	>0.05
P50503	F10A1_RAT	Hsc70-interacting protein (Hip) (Protein FAM10A1) (Protein ST13 homolog)	St13 Fam10a1 Hip	368	4.69092	0.184357	3.26901	0.248238	0.69688	0.0529188	<0.05
P50554	GABT_RAT	4-aminobutyrate aminotransferase, mitochondrial (EC 2.6.1.19) ((S)-3-amino-2-methylpropionate transaminase) (EC 2.6.1.22) (GABA aminotransferase) (GABA-AT) (Gamma-amino-N-butyrate transaminase) (GABA transaminase) (GABA-T) (L-AIBAT) [Cleaved into: 4-aminobutyrate aminotransferase, brain isoform; 4-aminobutyrate aminotransferase, liver isoform]	Abat Gabat	500	47.9675	1.18509	47.1625	1.03417	0.983218	0.0215598	>0.05
P51635	AK1A1_RAT	Alcohol dehydrogenase [NADP(+)] (EC 1.1.1.2) (3-DG-reducing enzyme) (Aldehyde reductase) (Aldo-keto reductase family 1 member A1)	Akr1a1 Alr	325	6.75042	0.424298	6.74771	0.425761	0.999599	0.0630717	>0.05
P51647	AL1A1_RAT	Retinal dehydrogenase 1 (RALDH 1) (RalDH1) (EC 1.2.1.36) (ALDH-E1) (ALHDII) (Aldehyde dehydrogenase family 1 member A1) (Aldehyde dehydrogenase, cytosolic)	Aldh1a1 Aldh	501	3.51312	0.32197	2.55221	0.432491	0.72648	0.123107	>0.05
P52481	CAP2_RAT	Adenylyl cyclase-associated protein 2 (CAP 2)	Cap2	477	5.86566	0.321517	5.2172	0.469218	0.889448	0.079994	>0.05
P52555	ERP29_RAT	Endoplasmic reticulum resident protein 29 (ERp29) (Endoplasmic reticulum resident protein 31) (ERp31)	Erp29	260	2.4472	0.366741	1.42813	0.222586	0.583577	0.0909554	<0.05
P52873	PYC_RAT	Pyruvate carboxylase, mitochondrial (EC 6.4.1.1) (Pyruvic carboxylase) (PCB)	Pc	1178	7.02692	0.739735	3.68405	0.464833	0.524277	0.0661503	<0.05
P54290	CA2D1_RAT	Voltage-dependent calcium channel subunit alpha-2/delta-1 (Voltage-gated calcium channel subunit alpha-2/delta-1) [Cleaved into: Voltage-dependent calcium channel subunit alpha-2-1; Voltage-dependent calcium channel subunit delta-1]	Cacna2d1 Cacnl2a Cchl2a	1091	7.20529	0.654831	5.83272	0.5763	0.809505	0.0799829	>0.05
[truncated: 625 more rows]
